# Supplementary material for: Advantages of Tyrosine Kinase Anti-Angiogenic Cediranib over Bevacizumab: Cell Cycle Abrogation and Synergy with Chemotherapy
Source: Pharmaceuticals (Basel). 2021 Jul 16;14(7):682. doi: 10.3390/ph14070682 (PMC8308742; doi:10.3390/ph14070682)
Supplement: Supplementary file 1 [file pharmaceuticals-14-00682-s001.zip › Supplemental Table S2 - Raw data for phosphoproteomic array.xlsx]

## Sheet: Recommended Leads
												Globally Normalized Values for the signal intensity of samples analyzed with the KAM-1325 antibody microarray data were colourized using the Conditional Formatting feature under Format in the pull down menu of MS-Excel. This feature lets users colourize cells in the spreadsheet according to their desired criteria. In the case of your data, the Globally Normalized intensity signals with a value of…
												The Conditional Formatting feature for %CFC (change from control) is set to blue for -100%, white for 0 changes, and orange for +200%. In this case, it is best to focus on orange coloured cells for follow up immunoblotting studies.
Recommended Leads for Order 4047
KAM-1325 ARRAY DETAILS												Lead Selection Recommendation for Follow Up Immunoblotting
Sample IDs:		Control ID: Hec50 CT (Kinexus ID: 20589) vs Treated ID: Hec50 bev (Kineuxs ID: 20590) vs Hec50 cediranib (Kinexus ID: 20591)										Priority	lead selection criteria: %CFC ≥75%; Sum of %Error <75% of %CFC; Average Normalized Net Signal ≥1500
Array Barcode:		K01803-1273, -1279		Protocol: Chemical cleavage pre-homogenization: Biotin-labelling								Possible	lead selection criteria: %CFC ≥45% + <75%; Sum of %Errors <80% of %CFC; Average Normalized Net Signal ≥750
Date of Report:		2020-02-21		Reviewed by: Dr. Steven Pelech
						Hec50 CT		Hec50 Bev				Hec50 Cediranib
Final Sort	Ab Spot ID #	Antibody Codes	Target Name	P-Site	Full Target Protein Name	Average Normalized Net Signal	% Error in Duplicate from Average	Average Normalized Net Signal	% Error in Duplicate from Average	%CFC	Lead	Average Normalized Net Signal	% Error in Duplicate from Average	%CFC	Lead		Preferred Protein Kinase Name	Protein Kinase	Kinase or Phosphatase Type	Protein Type	Kinase Type	Kinase Group	Kinase Family	Kinase Subfamily	Transcription Factor	Stress Protein	Protein Phosphatase	Adapter	Metabolic Enzyme	Antigen Sequence	Sequence Location in Target	Effect of Phosphorylation	Kinases Known to Target Phosphosite(s) in vitro	Protein Type - Extended	UniProt Link	PhosphoNET Link	KinaseNET Link	OncoNET Link	GO_CelComponent_list	GO_MolFunctin_list	GO_BioProcess_list
35	17	PK509	Abl2 (Arg)	Y439	Abelson murine leukemia viral oncogene homologue 2	3312.83	1.08248	1471.53	5.98067	-55.581	Possible	2192.2	6.29456	-33.8269			ARG	X	PYK	Protein kinase - Non-receptor-tyrosine kinase	Protein-tyrosine kinase	TK	Abl							GDT(pY)TAH(bA)C	Corresponds to amino acid residues G436 to H442; In the protein kinase catalytic domain activation T loop region between subdomains VII and VIII.	Y439 phosphorylation is predicted to be stimulatory for phosphotransferase activity. This phosphosite is located in the kinase activation loop between catalytic subdomains VII and VIII. It is the most predominent phosphorylation site in Abl2 by mass spectrometry (≥1165 reports).	Abl2	EC 2.7.10.2; Protein kinase, tyrosine (non-receptor); TK group; Abl family	P42684	P42684	P42684	P42684	GO:0015629; GO:0005829; GO:0031234	GO:0051015; GO:0003785; GO:0005524; GO:0000287; GO:0030145; GO:0004715; GO:0001784; GO:0004672; GO:0004713; GO:0005102	GO:0007155; GO:0006464; GO:0071300; GO:0045087; GO:0038083; GO:0018108; GO:0007204; GO:0010976; GO:0051353; GO:0010863; GO:2000249; GO:0010506; GO:0030155; GO:2000145; GO:0042127; GO:0030100; GO:0007165; GO:0007169
41	20	PN733	ACC1 (ACACA)	S29	Acetyl-CoA carboxylase 1	1178.37	4.80601	577.629	0.820327	-50.9808	Possible	798.901	13.285	-32.2031						Fatty acid synthesis									X	EDN(pS)EDE(bA)C	Corresponds to amino acid residues E26 to E32.	The effect of S29 phosphorylation is unclear. This is one of the major in vivo phosphorylation sites in ACC1 (≥78 reports based on mass spectrometry studies). This human phosphosite is highly conserved in vertebrates and also found in fish.	CK2a1 (CSNK2A1)	EC 6.4.1.2; Ligase; Carbohydrate Metabolism - pyruvate; EC 6.3.4.14; Carbohydrate Metabolism - propanoate; Lipid Metabolism - fatty acid biosynthesis	Q13085	Q13085		Q13085	GO:0015629; GO:0005829; GO:0001650	GO:0003989; GO:0005524; GO:0004075; GO:0042802; GO:0046872	GO:0006084; GO:0006853; GO:0071380; GO:0006633; GO:0046949; GO:0055088; GO:2001295; GO:0031325; GO:0051289; GO:0019538; GO:0045540; GO:0001894
43	21	PN202	ACC1 (ACACA)	S78+S80	Acetyl-CoA carboxylase 1	954.013	13.7982	506.135	4.671	-46.9467	Possible	660.561	14.8383	-30.7598															X	Not precisely defined.	Antibody raised against amino acid residues that encompass the S78 and S80 phosphosites.	The effect of S78 phosphorylation is unclear and it has been rarely observed (3 mass spectrometry reports). S80 phosphorylation produces enzyme inhibition. This is one of the major in vivo phosphorylation sites in ACC1 (≥80 reports based on mass spectrometry studies).	S78: PKACa (PRKACA). S80: AMPKa1 (PRKAA1); AMPKa2 (PRKAA2).	EC 6.4.1.2; Ligase; Carbohydrate Metabolism - pyruvate; EC 6.3.4.14; Carbohydrate Metabolism - propanoate; Lipid Metabolism - fatty acid biosynthesis	Q13085	Q13085		Q13085	GO:0015629; GO:0005829; GO:0001650	GO:0003989; GO:0005524; GO:0004075; GO:0042802; GO:0046872	GO:0006084; GO:0006853; GO:0071380; GO:0006633; GO:0046949; GO:0055088; GO:2001295; GO:0031325; GO:0051289; GO:0019538; GO:0045540; GO:0001894
207	102	NK193-3	AurKB (Aurora B, AIM-1)	Pan-specific	Aurora Kinase B (serine/threonine protein kinase 12)	5331.2	63.9287	9845.59	6.19459	84.6787	Possible	8479.39	5.04028	59.0522			AurB	X	PSTK	Protein kinase - Non-receptor protein-serine/threonine	Protein-serine/threonine kinase	Other	AUR							CDILTRHFTIDDFEIG	Corresponds to amino acid residues D66 to G80.			Protein-serine kinase, Other group, AUR family	Q96GD4	Q96GD4	Q96GD4	Q96GD4	GO:0010369; GO:0032133; GO:0000779; GO:0000780; GO:0005829; GO:0000776; GO:0030496; GO:1990023; GO:0005654; GO:0005634; GO:0005819; GO:0005876; GO:0051233; GO:0031616	GO:0005524; GO:0035174; GO:0019900; GO:0046872; GO:0004712; GO:0004674	GO:0009838; GO:0007568; GO:0031145; GO:0008608; GO:0008283; GO:0034644; GO:0036089; GO:0043988; GO:0016570; GO:0044878; GO:0051256; GO:0002903; GO:0032466; GO:0032091; GO:0000122; GO:0032467; GO:0051973; GO:1904355; GO:0032212; GO:0046777; GO:0034501; GO:0006468; GO:0051983; GO:1901796; GO:0031577; GO:0007051
275	138	PN116	BRCA1	S1423	Breast cancer type 1 susceptibility protein	101.078	94.9517	981.65	31.688	871.18	Possible	345.658	98.6696	241.971				X		Transcription, coactivator/corepressor										HG(pS)QP	Corresponds to amino acid residues H1421 to P1425; Surrounds the S1423 phosphosite.	S1423 phosphorylation induces interaction with ATM. This is one of the minor in vivo phosphorylation sites in BRCA1 (≥2 reports from high throughput mass spectrometry studies).	ATM; ATR	Nuclear receptor co-regulator; Transcription, coactivator/corepressor; Ubiquitin conjugating system; Tumor suppressor	P38398	P38398		P38398	GO:0070531; GO:0031436; GO:0005694; GO:0005737; GO:0008274; GO:0000800; GO:0005654; GO:0005634; GO:0005886; GO:0032991; GO:1990904; GO:0000151	GO:0050681; GO:0003684; GO:0003677; GO:0019899; GO:0042802; GO:0003723; GO:0070063; GO:0003713; GO:0044212; GO:0015631; GO:0031625; GO:0004842; GO:0008270	GO:0030521; GO:0006915; GO:0006974; GO:0071681; GO:0071356; GO:0007098; GO:0043009; GO:0007059; GO:0006978; GO:0000729; GO:0006260; GO:0009048; GO:0006302; GO:0000724; GO:0006303; GO:0006633; GO:0008630; GO:0044818; GO:0046600; GO:1902042; GO:0045717; GO:0070317; GO:0035067; GO:0051572; GO:0051573; GO:0033147; GO:2000378; GO:0045892; GO:0045766; GO:0071158; GO:0045739; GO:0010628; GO:0035066; GO:…
317	160	NK302-2	CaMK2a	Pan-specific	Calcium/calmodulin-dependent protein kinase type II subunit alpha	41.184	37.6056	6694.76	15.0559	16155.7	Likely Ab spot mis-print	2611.88	67.3199	6241.98	Likely Ab spot mis-print		CaMK2a	X	PSTK	Protein kinase - Non-receptor protein-serine/threonine	Protein-serine/threonine kinase	CAMK	CAMK2							Epitope undefined.				EC 2.7.11.17; Protein kinase, Ser/Thr (non-receptor); CAMK domain target; CAMK</A> group; CAMK2 family	Q9UQM7	Q9UQM7	Q9UQM7		GO:0005954; GO:0030054; GO:0005737; GO:0005829; GO:0043197; GO:0030666; GO:0005739; GO:0043005; GO:0005654; GO:0005634; GO:0005886; GO:0014069; GO:0042734; GO:0098685	GO:0005524; GO:0009931; GO:0005516; GO:0004683; GO:0035254; GO:0042802; GO:0016301; GO:0046872; GO:0042803; GO:0004674; GO:0005088	GO:0038166; GO:0006816; GO:0030154; GO:0048813; GO:0060996; GO:0000082; GO:0060333; GO:0035556; GO:0000165; GO:0007399; GO:0018105; GO:1990443; GO:0018107; GO:0051928; GO:0010666; GO:0051092; GO:0046777; GO:0006468; GO:1902108; GO:0048168; GO:2001222; GO:0046928; GO:0099148; GO:0002931; GO:0007223
353	184	NN022-1	Caveolin 2	Pan-specific	Caveolin 2	416.349	36.8818	993.236	52.3041	138.559	Possible	365.153	21.1088	-12.2965																Epitope undefined.				Adapter/scaffold protein	P51636	P51636			GO:0002080; GO:0005901; GO:0031410; GO:0031234; GO:0005925; GO:0005794; GO:0000139; GO:0005887; GO:0005622; GO:0016020; GO:0045121; GO:0005634; GO:0048471; GO:0005886; GO:0032991; GO:0030133	GO:0031748; GO:0030674; GO:0032947; GO:0046982; GO:0042803; GO:0019901; GO:0097110	GO:0070836; GO:0007029; GO:0008286; GO:0007005; GO:0001937; GO:0030512; GO:0044794; GO:0044791; GO:0060161; GO:0001938; GO:0043547; GO:0043410; GO:0051259; GO:0019065; GO:0007088; GO:0048741; GO:0048278; GO:0006906; GO:0016050
361	188	PN171	Cbl	Y700	E3 ubiquitin-protein ligase CBL	547.32	65.6186	1398.68	25.5884	155.551	Possible	955.84	11.4094	74.6402						Ubiquitin protein ligase										TE(pY)MT	Corresponds to amino acid residues T768 to T772.	Y700 phosphorylation induces interaction with CRK, Src, and VAV1. This is one of the major in vivo phosphorylation sites in Cbl (≥505 reports from high throughput mass spectrometry studies).	Abl1; Fyn; InsR; Lck; Src; Syk; Yes	Ubiquitin conjugating system; EC 6.3.2.-; Ligase; Adaptor/scaffold	P22681	P22681		P22681	GO:0005829; GO:0016600; GO:0005925; GO:0030426; GO:0042629; GO:0045121; GO:0048471; GO:0005886	GO:0045296; GO:0005509; GO:0003700; GO:0046875; GO:0005154; GO:0036312; GO:0001784; GO:0030971; GO:0017124; GO:0061630; GO:0004842	GO:0007166; GO:0006974; GO:0071364; GO:1990090; GO:0090650; GO:0036120; GO:0019221; GO:0035635; GO:0007173; GO:0008543; GO:0070102; GO:0008584; GO:0043303; GO:0061024; GO:0043066; GO:0007175; GO:0042059; GO:1901215; GO:0070997; GO:0045742; GO:0014068; GO:0048260; GO:0006513; GO:0000209; GO:0016567; GO:0014823; GO:0045471; GO:0010332; GO:0042594; GO:0033574; GO:0007179; GO:0006511
661	327	NN039-3	eIF4E	Pan-specific	Eukaryotic translation initiation factor 4 (mRNA cap binding protein)	666.879	18.119	490.677	26.2312	-26.4219		1062.49	0.620902	59.3222	Possible															Not precisely defined.	Antibody raised against full length human eIF4E.			Protein synthesis protein	P06730	P06730		P06730	GO:0033391; GO:0005737; GO:0036464; GO:0010494; GO:0005829; GO:0016281; GO:0070062; GO:0098978; GO:0005845; GO:0000932; GO:0048471; GO:0099524; GO:0016442	GO:0019899; GO:0031370; GO:0070491; GO:0000340; GO:0003723; GO:0000339; GO:0003743; GO:0045182	GO:0001662; GO:0071549; GO:0000082; GO:0030324; GO:0006406; GO:0045665; GO:0017148; GO:0045931; GO:0006417; GO:0099578; GO:0006405; GO:0019827; GO:0006413; GO:0016032
703	347	PK610	EphB2	Y780	Ephrin type-B receptor 2 protein-tyrosine kinase	736.392	19.5846	636.192	38.4836	-13.607		1155.01	5.35406	56.8475	Possible		EPHB2	X	PYK	Protein kinase - Receptor-tyrosine kinase	Protein-tyrosine kinase	TK	Eph							DPT(pY)TSA(bA)C	Corresponds to amino acid residues D777 to A783; In protein kinase catalytic domain activation T-loop between subdomains VII and VIII.	Y780 phosphorylation is predicted to be stimulatory for phosphotransferase activity. This phosphosite is located in the kinase activation loop between catalytic subdomains VII and VIII. This is the major in vivo phosphorylation site in EphB2 (≥152reports from high throughput mass spectrometry studies).		EC 2.7.10.1; Receptor tyrosine kinase; TK domain target; TK</A> group; Eph family	P29323	P29323	P29323	P29323	GO:0030424; GO:0005829; GO:0030425; GO:0005576; GO:0098978; GO:0005887; GO:0099055; GO:0099056; GO:0043025; GO:0005634; GO:0005886; GO:0098794	GO:0001540; GO:0005524; GO:0008046; GO:0042802; GO:0044877; GO:0004713; GO:0005102; GO:0005005	GO:0001525; GO:0007413; GO:0007411; GO:0048593; GO:0021952; GO:0071679; GO:0022038; GO:0060996; GO:0060997; GO:0048013; GO:0051389; GO:0042472; GO:0007612; GO:0007611; GO:0050771; GO:0070373; GO:1904782; GO:0001933; GO:0046580; GO:0007399; GO:0106028; GO:0021631; GO:0018108; GO:0016310; GO:0010628; GO:0048170; GO:1900273; GO:1904783; GO:1903078; GO:0051965; GO:0031915; GO:0097104; GO:0050878; GO:…
705	348	PK611	EphB3	Y600	Ephrin type-B receptor 3 protein-tyrosine kinase	1080.52	2.1749	921.584	18.0725	-14.7088		1721.08	8.31208	59.2829	Possible		EPHB3	X	PYK	Protein kinase - Receptor-tyrosine kinase	Protein-tyrosine kinase	TK	Eph							LQQ(pY)IAP(bA)C	Corresponds to amino acid residues L597 to P603; In the EphA2_TM region between the transmembrane and kinase catalytic domains.	The effect of Y600 phosphorylation is unclear. This is the major in vivo phosphorylation site for EphB3 (≥310 reports from high throughput mass spectrometry studies).		Receptor tyrosine kinase; EC 2.7.10.1; TK group; Eph family	P54753	P54753	P54753	P54753	GO:0005829; GO:0030425; GO:0005576; GO:0005887; GO:0005886	GO:0005524; GO:0008046; GO:0005003; GO:0004713	GO:0001525; GO:0007413; GO:0007411; GO:0016477; GO:0021952; GO:0022038; GO:0060996; GO:0060997; GO:0048546; GO:0048013; GO:0051965; GO:0046777; GO:0050770; GO:0022407; GO:0043087; GO:0031290; GO:0060021; GO:0034446; GO:0048538; GO:0001655
815	405	PK151	FAK (PTK2)	Y576+Y577	Focal adhesion protein-tyrosine kinase	683.196	1.67948	1039.16	27.9393	52.1024	Possible	771.986	17.1584	12.9963			FAK	X	PYK	Protein kinase - Non-receptor protein-tyrosine	Protein-tyrosine kinase	TK	Fak							ST(pY)(pY)KA	Corresponds to amino acid residues S574 to A579.	Y576 and Y577 phosphorylation stimulates phosphotransferase activity. These phosphosites are located in the kinase activation loop between catalytic subdomains VII and VIII. These are two of the major in vivo phosphorylation sites in FAK (≥2549 and ≥1764 reports, respectively, by mass spectrometry).	Y576: Bmx (Etk); FAK (PTK2); Fgr, Met; Ret; Src. Y577: Bmx (Etk); FAK (PTK2); Fgr, Met; Ret; Src.	Protein-tyrosine kinase, TK group, Fak family	Q05397	Q05397	Q05397	Q05397	GO:0016324; GO:0005938; GO:0005737; GO:0005856; GO:0005829; GO:0031234; GO:0005925; GO:0030027; GO:0005815; GO:0005634; GO:0005886; GO:0001725	GO:0003779; GO:0005524; GO:0008432; GO:0004715; GO:0004672; GO:0019901; GO:0019903; GO:0004713; GO:0005088; GO:0042169; GO:0005102	GO:0001525; GO:0007411; GO:0048870; GO:0021955; GO:0043542; GO:0048013; GO:0007173; GO:0030010; GO:0030198; GO:0038096; GO:0060396; GO:0003007; GO:0045087; GO:0007229; GO:0000165; GO:0000226; GO:2000811; GO:0043066; GO:0010507; GO:0050771; GO:0022408; GO:0046621; GO:0051964; GO:0038007; GO:0001764; GO:0007097; GO:0038083; GO:0018108; GO:0001890; GO:0010613; GO:0030335; GO:0008284; GO:0043552; GO:…
959	477	NN260-2	GFAP	Pan-specific	Glial fibrillary acidic protein	149.329	38.9061	1490.92	32.5133	898.414	Possible	1979.61	0.16671	1225.67	Priority															Epitope undefined.				Cytoskeletal protein	P14136	P14136			GO:0097450; GO:0044297; GO:0005737; GO:0098574; GO:0005829; GO:0005882; GO:0043209	GO:0042802; GO:0005178; GO:0019900; GO:0005200	GO:0014002; GO:0060020; GO:0030198; GO:0045109; GO:0060291; GO:0010977; GO:0031102; GO:0010625; GO:1904714; GO:0051580; GO:0043254; GO:0009611
1005	499	PK188	GSK3b	S9	Glycogen synthase-serine kinase 3 beta	629.514	11.9162	931.448	14.7867	47.9631	Possible	904.041	10.0593	43.6094			GSK3B	X	PSTK	Protein kinase - Non-receptor protein-serine/threonine	Protein-serine/threonine kinase	CMGC	GSK							Not precisely defined.	Antibody raised against amino acid residues that encompass the S9 phosphosite.	S9 phosphorylation inhibits phosphotransferase activity. Phosphorylation regulates apoptosis, cell adhesion, cell growth, cell motility, cytoskeletal reorganization, transcription, alters intracellular location, and protein degradation. This is one of the less major in vivo phosphorylation sites in GSK3b (≥262reports from high throughput mass spectrometry studies).	Akt1 (PKBa); Akt3 (PKBg); AurA (STK15); GSK3b; ILK; KHS1 (MAP4K5); p70S6K (RPS6KB1); PKACa (PRKACA); PKCa (PRKCA); PKCb1 (PRKCB1); PKCd (PRKCD); PKCg (PRKCG); PKCh (PRKCH); PKCz (PRKCZ); PKG1 (PRKG1); RSK1 (RPS6KA1); RSK2 (RPS6KA3); SGK3	Protein kinase, Ser/Thr (non-receptor); EC 2.7.11.26; CMGC group; GSK family; GSK subfamily	P49841	P49841	P49841	P49841	GO:0030424; GO:0030877; GO:0005813; GO:0005737; GO:0005829; GO:0030425; GO:0098978; GO:0005739; GO:0005654; GO:0005634; GO:0005886; GO:0098794; GO:1990909	GO:0005524; GO:0008013; GO:0034452; GO:0016301; GO:0051059; GO:0002039; GO:0002020; GO:0034236; GO:0004672; GO:0019901; GO:0004674; GO:0001085; GO:0050321; GO:0031625	GO:1904885; GO:1904886; GO:1904646; GO:0036016; GO:0007623; GO:0007212; GO:0001837; GO:0006983; GO:0030010; GO:0060079; GO:0097191; GO:0097192; GO:0005977; GO:0021766; GO:0035556; GO:0030011; GO:0043066; GO:0070885; GO:0090090; GO:1904339; GO:2000466; GO:0045719; GO:1901215; GO:0032515; GO:1901984; GO:0032091; GO:0031333; GO:1900181; GO:2000077; GO:0031175; GO:0106028; GO:0018105; GO:0018107; GO:…
1007	500	PK883	GSK3b	T275+T277	Glycogen synthase-serine kinase 3 beta	8110.48	22.6203	11729.2	1.54206	44.6178	Possible	12613.7	0.620278	55.5239	Possible		GSK3B	X	PSTK	Protein kinase - Non-receptor protein-serine/threonine	Protein-serine/threonine kinase	CMGC	GSK							VLG(pT)P(pT)REQ(bA)C	Corresponds to amino acid residues V272 to Q280. These sites are located in the Gap/Insert 10 (G/I10) region in the protein-serine/threonine kinase catalytic domain of GSK3b, and they are also found in GSK3a at T338 and T340.	The effects of T275 and T277 phosphorylation are unclear. T275 and T277 have not yet been identified as phosphosites in GSK3b by mass spectrometry studies.		Protein kinase, Ser/Thr (non-receptor); EC 2.7.11.26; CMGC group; GSK family; GSK subfamily	P49841	P49841	P49841	P49841	GO:0030424; GO:0030877; GO:0005813; GO:0005737; GO:0005829; GO:0030425; GO:0098978; GO:0005739; GO:0005654; GO:0005634; GO:0005886; GO:0098794; GO:1990909	GO:0005524; GO:0008013; GO:0034452; GO:0016301; GO:0051059; GO:0002039; GO:0002020; GO:0034236; GO:0004672; GO:0019901; GO:0004674; GO:0001085; GO:0050321; GO:0031625	GO:1904885; GO:1904886; GO:1904646; GO:0036016; GO:0007623; GO:0007212; GO:0001837; GO:0006983; GO:0030010; GO:0060079; GO:0097191; GO:0097192; GO:0005977; GO:0021766; GO:0035556; GO:0030011; GO:0043066; GO:0070885; GO:0090090; GO:1904339; GO:2000466; GO:0045719; GO:1901215; GO:0032515; GO:1901984; GO:0032091; GO:0031333; GO:1900181; GO:2000077; GO:0031175; GO:0106028; GO:0018105; GO:0018107; GO:…
1377	684	PN759	MAT1A	T341	S-adenosylmethionine synthase isoform type-1	9338.03	71.409	20289.8	0.968838	117.282	Priority	10351	10.2565	10.8475															X	SQK(pT)ERE(bA)C	Corresponds to amino acid residues S338 to E344.	The effect of T341 phosphorylation is unclear. Phosphorylation at this site in MAT1A has only been reported in one mass spectrometry study. This human phosphosite is highly conserved in vertebrates and also found in yeast.		Enzyme, transferase	Q00266	Q00266			GO:0005829	GO:0005524; GO:0042802; GO:0046872; GO:0004478; GO:0098601	GO:0009087; GO:0032259; GO:0006730; GO:0051289; GO:0006556; GO:0001887; GO:0000096
1393	692	PN622	MEF2A	T108	Myocyte-specific enhancer factor 2A	7553.68	86.3699	17239.8	5.28816	128.231	Possible	10416.4	15.349	37.8988						Transcription protein					X					SYVL(pT)PHTE(bA)C	Corresponds to amino acid residues S104 to E112.	The effect of T108 phosphorylation is unclear. This is one of the major in vivo phosphorylation sites in MEF2A (≥26 reports from high throughput mass spectrometry studies).	p38a MAPK (MAPK14)	Transcription protein	Q02078	Q02078			GO:0005829; GO:0000790; GO:0005654; GO:0005634; GO:0005667	GO:0033613; GO:0003682; GO:0003700; GO:0035035; GO:0042826; GO:0046982; GO:0019901; GO:0000978; GO:0000977; GO:0000981; GO:0001085; GO:0043565; GO:0046332; GO:0001077; GO:0003713; GO:0003705	GO:0006915; GO:0061337; GO:0071277; GO:0048813; GO:0070375; GO:0007507; GO:0000165; GO:0000002; GO:0048311; GO:0007517; GO:0000122; GO:0010613; GO:0046326; GO:0051149; GO:0045944; GO:0006351; GO:0055005
1397	694	PN623	MEF2C	S396	Myocyte-specific enhancer factor 2C	6621.25	12.1239	9866.43	0.90718	49.0115	Possible	7276.94	0.478437	9.9028						Transcription protein					X					SEPV(pS)PPRD(bA)C	Corresponds to amino acid residues S392 to D400.	S396 phosphorylation induces MEF2C transcriptional activity and facilitates its sumoylation at K391, which in turn recruits co-repressors to inhibit transcription. This is one of the less major in vivo phosphorylation sites in MEF2C (≥8 reports from high throughput mass spectrometry studies).	CDK1 (CDC2)	Transcription protein	Q06413	Q06413		Q06413	GO:0005737; GO:0005829; GO:0043231; GO:0016607; GO:0005654; GO:0005634; GO:0098794; GO:0032991; GO:0016528	GO:0033613; GO:0003680; GO:0003682; GO:0003677; GO:0003700; GO:0042826; GO:0071837; GO:0046982; GO:0000980; GO:0000978; GO:0000977; GO:0000981; GO:0001205; GO:0001077; GO:0000983; GO:0044212	GO:0006915; GO:0001782; GO:0042100; GO:0050853; GO:0001568; GO:0001974; GO:0014898; GO:0003211; GO:0060536; GO:0048667; GO:0071277; GO:0035690; GO:0071498; GO:0071222; GO:0071374; GO:0071560; GO:0035984; GO:0002062; GO:0048703; GO:0001958; GO:2001013; GO:0060079; GO:0002467; GO:0072102; GO:0007507; GO:0001947; GO:0006959; GO:0007611; GO:0000165; GO:0030318; GO:0030224; GO:0007521; GO:0007517; GO:…
1701	846	PK737	NuaK1 (ARK5)/Nuak2	T211	NUAK family SNF1-like kinase 1; AMPK-related protein kinase 5	13268.4	9.25084	8529.24	1.34505	-35.7176		6300.42	0.213298	-52.5156	Possible		NUAK1	X	PSTK	Protein kinase - Non-receptor protein-serine/threonine	Protein-serine/threonine kinase	CAMK	CAMKL	NuaK						FLQ(pT)FCG(bA)C	Corresponds to amino acid residues F208 to G214; In protein kinase catalytic domain activation T-loop between subdomains VII and VIII.	T211 phosphorylation stimulates phosphotransferase activity. This phosphosite is located in the kinase activation loop between catalytic subdomains VII and VIII. This is a minor in vivo phosphorylation sites in Nuak1 (≥1 report from high throughput mass spectrometry studies).	LKB1 (STK11); NDR2 (STK38L)	EC 2.7.11.1; Protein kinase, Ser/Thr (non-receptor); CAMK group; CAMKL family; NuaK subfamily	O60285	O60285	O60285	O60285	GO:0005737; GO:0001650; GO:0015630; GO:0005654; GO:0005634	GO:0005524; GO:0046872; GO:0002039; GO:0004674	GO:0007155; GO:0006974; GO:0035556; GO:0006468; GO:0030155; GO:0042127; GO:2000772; GO:0035507; GO:1901796
1725	860	PK742	p38d MAPK (MAPK13)	T180+Y182	Mitogen-activated protein-serine kinase p38 delta; Mitogen-activated protein kinase 13	1121.13	27.748	511.296	8.50377	-54.3944	Possible	757.71	8.58288	-32.4152			p38d	X	PSTK	Protein kinase - Non-receptor protein-serine/threonine	Protein-serine/threonine kinase	CMGC	MAPK	p38						AEM(pT)G(pY)(bA)C	Corresponds to amino acid residues A177 to Y182; In the protein kinase catalytic domain activation T loop region between subdomains VII and VIII.	T180 and Y182 phosphorylation is stimulatory for phosphotransferase activity. These phosphosites are located in the kinase activation loop between catalytic subdomains VII and VIII. These are two of the major in vivo phosphorylation sites in p38a (≥382 and >986 reports, respectively, from high throughput mass spectrometry studies).	T180: MKK3 (MAP2K3, MEK3); MKK6 (MAP2K6, MEK6). Y182: MKK3 (MAP2K3, MEK3); MKK6 (MAP2K6, MEK6).	EC 2.7.11.24; EC 2.7.1.37; Protein kinase, Ser/Thr (non-receptor); CMGC group; MAPK family; MAPK/p38 subfamily; p38 subfamily	O15264	O15264	O15264	O15264	GO:0005737; GO:0005829; GO:0005634	GO:0005524; GO:0004707; GO:0004674	GO:0007049; GO:0072740; GO:0070301; GO:0071347; GO:1903936; GO:0072709; GO:0034644; GO:0018105; GO:0050729; GO:0032755; GO:0010468; GO:0006355; GO:0006970; GO:0051403; GO:0006351
1763	879	NK223-2	p70S6K (S6Ka, RPS6KB1)	Pan-specific	Ribosomal protein S6 kinase beta-1; Ribosomal protein S6 kinase 1	8055.86	31.3285	4312.03	1.50546	-46.4734	Possible	6370.45	6.31154	-20.9216			p70S6K	X	PSTK	Protein kinase - Non-receptor protein-serine/threonine	Protein-serine/threonine kinase	AGC	RSK	p70						MAGVFDIDLDQPEDAC	Corresponds to amino acid residues M24 to A38; Post-N-terminus.			Protein-serine kinase, AGC group, RSK family, p70 subfamily	P23443	P23443	P23443	P23443	GO:0030054; GO:0009986; GO:0005737; GO:0005829; GO:0005741; GO:0005739; GO:0043005; GO:0005654; GO:0005634; GO:0048471; GO:0045202	GO:0005524; GO:0042802; GO:0016301; GO:0030165; GO:0042277; GO:0004672; GO:0051721; GO:0004712; GO:0004674; GO:0004711	GO:0007568; GO:0006915; GO:0001662; GO:0016477; GO:0071549; GO:0071363; GO:0032869; GO:0071346; GO:0000082; GO:0007281; GO:0044539; GO:0007616; GO:0043066; GO:2001237; GO:0046627; GO:0018105; GO:0048015; GO:0045931; GO:0048633; GO:0014911; GO:0048661; GO:0045727; GO:0045948; GO:0043491; GO:0046324; GO:0014878; GO:0045471; GO:0033762; GO:0009749; GO:0009408; GO:0043201; GO:0032496; GO:0009612; GO:…
1765	880	PK145	p70S6K (S6Ka, RPS6KB1)	T252	Ribosomal protein S6 kinase beta-1; Ribosomal protein S6 kinase 1	379.329	43.9183	733.255	3.36419	93.3029	Possible	325.231	2.96581	-14.2616			p70S6K	X	PSTK	Protein kinase - Non-receptor protein-serine/threonine	Protein-serine/threonine kinase	AGC	RSK	p70						Not precisely defined.	Antibody raised against amino acid residues that encompass the T229 phosphosite.	T252 phosphorylation stimulates phosphotransferase activity. This phosphosite is located in the kinase activation loop between catalytic subdomains VII and VIII. Phosphorylation regulates protein translation and protein conformation. This is one of the minor in vivo phosphorylation sites in p70 S6K (≥18 reports from high throughput mass spectrometry studies).	PDPK1 (PDK1); PIK3CD	Protein-serine kinase, AGC group, RSK family, p70 subfamily	P23443	P23443	P23443	P23443	GO:0030054; GO:0009986; GO:0005737; GO:0005829; GO:0005741; GO:0005739; GO:0043005; GO:0005654; GO:0005634; GO:0048471; GO:0045202	GO:0005524; GO:0042802; GO:0016301; GO:0030165; GO:0042277; GO:0004672; GO:0051721; GO:0004712; GO:0004674; GO:0004711	GO:0007568; GO:0006915; GO:0001662; GO:0016477; GO:0071549; GO:0071363; GO:0032869; GO:0071346; GO:0000082; GO:0007281; GO:0044539; GO:0007616; GO:0043066; GO:2001237; GO:0046627; GO:0018105; GO:0048015; GO:0045931; GO:0048633; GO:0014911; GO:0048661; GO:0045727; GO:0045948; GO:0043491; GO:0046324; GO:0014878; GO:0045471; GO:0033762; GO:0009749; GO:0009408; GO:0043201; GO:0032496; GO:0009612; GO:…
1889	945	PN524	PFN1	Y129	Profilin 1	2209.8	14.7411	805.552	8.37503	-63.5465	Possible	1678.99	9.98386	-24.0207																KKC(pY)EMA(bA)C	Corresponds to amino acid residues K126 to A132; In the end of the Profilin domain.	Y129 phosphorylation induces interaction with VHL. This is the major in vivo phosphorylation site in Profilin 1 (≥666 reports from high throughput mass spectrometry studies).	KDR (VEGFR2); Src	Cytoskeletal protein; Actin binding protein	P07737	P07737		P07737	GO:0072562; GO:0005938; GO:0005737; GO:0005856; GO:0005829; GO:0070062; GO:0005925; GO:0098978; GO:0016020; GO:0043005; GO:0005634; GO:0098688; GO:0098794; GO:0098793; GO:0098685	GO:0003779; GO:0003785; GO:0000774; GO:0045296; GO:0005546; GO:0070064; GO:0017048; GO:0003723; GO:0005102	GO:0030036; GO:0071363; GO:0098885; GO:0032232; GO:0030837; GO:0051497; GO:0001843; GO:0032233; GO:0030838; GO:0032781; GO:0051054; GO:0010634; GO:1900029; GO:0051496; GO:0045944; GO:0050434; GO:0050821; GO:0060074; GO:0060071
2007	1006	NK139-2	PKD3 (PRKCN)	Pan-specific	Protein-serine kinase C nu; Serine/threonine-protein kinase D3	1463.52	9.89581	2496.96	12.0368	70.6125	Possible	2418.56	26.9007	65.2561	Possible		PKD3	X	PSTK	Protein kinase - Non-receptor protein-serine/threonine	Protein-serine/threonine kinase	CAMK	PKD							TDTMVYFVGENNGDSSHNGC	Corresponds to amino acid residues T490 to N507; Just before kinase catalytic domain.			Protein kinase, Ser/Thr (non-receptor); EC 2.7.11.13; CAMK group; PKD family	O94806	O94806	O94806		GO:0005829; GO:0016020; GO:0005654	GO:0005524; GO:0016301; GO:0046872; GO:0004697; GO:0004674	GO:0007205; GO:0089700; GO:0006468; GO:0030148
2113	1057	PK782	PRKACA/B (PKA, PKACA/B)	T196+T198	cAMP-dependent protein kinase catalytic subunit alpha/beta	5482.44	37.9965	9674.53	8.67586	76.4639	Priority	9022.23	5.0142	64.566	Possible		PKACa	X	PSTK	Protein kinase - Non-receptor protein-serine/threonine	Protein-serine/threonine kinase	AGC	PKA							KGR(pT)W(pT)LCG(bA)C	Corresponds to amino acid residues K193 to G201; In the protein kinase catalytic domain activation T loop region between subdomains VII and VIII.	T196 and T198 phosphorylation stimulate phosphotransferase activity and regulates stability. This phosphosite is located in the kinase activation loop between catalytic subdomains VII and VIII. These are two of the major sites of in vivo phosphorylation of PRKACA.	T198: PDPK1 (PDK1); PKACa (PRKACA)	EC 2.7.11.11; Protein kinase, Ser/Thr (non-receptor); AGC group; PKA family	P17612	P17612	P17612		GO:0001669; GO:0034704; GO:0005952; GO:0005813; GO:0097546; GO:0005737; GO:0005829; GO:0070062; GO:0045171; GO:0016020; GO:0005739; GO:0031514; GO:0016607; GO:0005654; GO:0031588; GO:0005634; GO:0048471; GO:0044853; GO:0097225	GO:0005524; GO:0004691; GO:0004672; GO:0034237; GO:0019901; GO:0004712; GO:0004674; GO:0031625	GO:0034199; GO:0007596; GO:0035584; GO:0086064; GO:0071872; GO:0071377; GO:0071333; GO:0034605; GO:0097711; GO:0019221; GO:0000086; GO:0034380; GO:0006397; GO:0018105; GO:0071158; GO:0010737; GO:0006468; GO:2000810; GO:1903779; GO:0055117; GO:0010881; GO:0051480; GO:0010389; GO:0002027; GO:0016241; GO:0045667; GO:0061136; GO:0043393; GO:0060314; GO:0003091; GO:0048240; GO:0002223
2143	1071	PP509	PTPN1 (PTP1B)	S50	Tyrosine-protein phosphatase non-receptor type 1	908.789	2.94743	918.607	29.3728	1.08031		1306.4	0.861967	43.7519	Possible				PYP	Protein phosphatase, tyrosine (non-receptor)							X			RDV(pS)PFD(bA)C	Corresponds to amino acid residues R47 to D53.	S50 phosphorylation stimulates phosphatase activity and protein interaction inhibition. This is one of the major sites of in vivo phosphorylation of PTPN1 (≥30 reports from high throughput mass spectrometry studies). This particular human phosphosite is highly conserved in vertebrates and also found in the frog.	Akt3 (PKBg); CLK1; CLK2	Phosphatase; EC 3.1.3.48; Protein phosphatase, tyrosine (non-receptor)	P18031	P18031			GO:0098554; GO:0005829; GO:0005769; GO:0005783; GO:0097443	GO:0045296; GO:0019899; GO:0046875; GO:0005158; GO:0019901; GO:0051721; GO:0004725; GO:0030971; GO:0003723; GO:0008270	GO:0031532; GO:0007257; GO:0034620; GO:0030968; GO:0008286; GO:0036498; GO:0060397; GO:1902236; GO:0070373; GO:0046627; GO:0043407; GO:1903898; GO:0009968; GO:0030948; GO:0035335; GO:1990264; GO:0035791; GO:1903896; GO:0061098; GO:2000646; GO:0006470; GO:0030100; GO:1902202; GO:0033157; GO:0009966; GO:0060338
2221	1107	PK791	Raf1 (RafC)	S296	Raf1 proto-oncogene-encoded protein-serine kinase	5951.04	7.63687	8661.53	10.4872	45.5464	Possible	6212.74	1.54476	4.39749			RAF1	X	PSTK	Protein kinase - Non-receptor protein-serine/threonine	Protein-serine/threonine kinase	TKL	RAF							LSS(pS)PNN(bA)C	Corresponds to amino acid residues L293 to N299; In the region between the C1_1 and kinase catalytic domains.	S296 phosphorylation inhibits phosphotransferase activity and inhibits interaction with H-Ras-1. This is a major in vivo phosphorylation site in Raf1.	ERK1 (MAPK3)	Protein kinase, Ser/Thr (non-receptor); EC 2.7.11.1; TKL group; RAF family	P04049	P04049	P04049	P04049	GO:0005737; GO:0005829; GO:0005794; GO:0005741; GO:0016607; GO:0005886; GO:0031143	GO:0010856; GO:0008179; GO:0005524; GO:0019899; GO:0042802; GO:0016301; GO:0004709; GO:0046872; GO:0031434; GO:0046982; GO:0004672; GO:0004674	GO:0007190; GO:0000186; GO:0006915; GO:0030154; GO:0008283; GO:0071550; GO:0060324; GO:0007507; GO:0035773; GO:0045104; GO:0034220; GO:0000165; GO:0007275; GO:0043066; GO:0008285; GO:0043154; GO:1902042; GO:0031333; GO:0009968; GO:0048011; GO:0030168; GO:0070374; GO:0033138; GO:0045944; GO:0006468; GO:0042981; GO:0045595; GO:2000145; GO:0035023; GO:0001666; GO:0035994; GO:0007165; GO:0035019; GO:…
2225	1109	PK212	Raf1 (RafC)	S621	Raf1 proto-oncogene-encoded protein-serine kinase	750.176	0.578903	707.851	9.89779	-5.64202		1136.94	18.8577	51.5566	Possible		RAF1	X	PSTK	Protein kinase - Non-receptor protein-serine/threonine	Protein-serine/threonine kinase	TKL	RAF							Epitope undefined.	Antibody raised against amino acid residues that encompass the S621 phosphosite.	Phosphorylation of S621 stimulates phosphotransferase activity, but has also been reported to be inhibitory; Phosphorylation regulates protein interactions and cell growth. This is one of the major sites of in vivo phosphorylation of Raf-1.	PKACa (PRKACA); Raf1	Protein kinase, Ser/Thr (non-receptor); EC 2.7.11.1; TKL group; RAF family	P04049	P04049	P04049	P04049	GO:0005737; GO:0005829; GO:0005794; GO:0005741; GO:0016607; GO:0005886; GO:0031143	GO:0010856; GO:0008179; GO:0005524; GO:0019899; GO:0042802; GO:0016301; GO:0004709; GO:0046872; GO:0031434; GO:0046982; GO:0004672; GO:0004674	GO:0007190; GO:0000186; GO:0006915; GO:0030154; GO:0008283; GO:0071550; GO:0060324; GO:0007507; GO:0035773; GO:0045104; GO:0034220; GO:0000165; GO:0007275; GO:0043066; GO:0008285; GO:0043154; GO:1902042; GO:0031333; GO:0009968; GO:0048011; GO:0030168; GO:0070374; GO:0033138; GO:0045944; GO:0006468; GO:0042981; GO:0045595; GO:2000145; GO:0035023; GO:0001666; GO:0035994; GO:0007165; GO:0035019; GO:…
2253	1123	NN170	RelB	Pan-specific	Transcription factor RelB	437.219	67.7997	846.25	8.71079	93.5526	Possible	859.726	1.31767	96.6349	Possible					Transcription protein					X					LLSPG	Corresponds to amino acid residues L550 to G554; Surrounds the S552 phosphosite.			Transcription protein	Q01201	Q01201		Q01201	GO:0005829; GO:0033256; GO:0005815; GO:0005654; GO:0005634; GO:0032991	GO:0003682; GO:0003700; GO:0042802; GO:0019901; GO:0000980; GO:0000977; GO:0000981; GO:0003714	GO:0019882; GO:0071470; GO:0032922; GO:0007249; GO:0006954; GO:0045087; GO:0030098; GO:0043011; GO:0032688; GO:0000122; GO:0038061; GO:0045944; GO:0034097; GO:0002223; GO:0045063; GO:0006351
2427	1211	PK107	Src	Y419	Src oncogene-encoded protein-tyrosine kinase	1184.36	6.24193	133.897	11.9104	-88.6945	Possible	1161.07	5.12705	-1.96601			SRC	X	PYK	Protein kinase - Non-receptor-tyrosine kinase	Protein-tyrosine kinase	TK	Src							Not precisely defined.	Antibody raised against amino acid residues that encompass the Y418 phosphosite.	Y419 phosphorylation stimulates phosphotransferase activity and induces interaction with Cbl-c and SHPS1. This is one of the major sites of in vivo phosphorylation of Src.	EphB2; FAK (PTK2); Met; PDGFRA; PDGFRB; PKACa (PRKACA); PYK2 (PTK2B; FAK2); Src	Protein-tyrosine kinase, TK group, Src family	P12931	P12931	P12931	P12931	GO:0005884; GO:0005901; GO:0005737; GO:0005829; GO:0070062; GO:0031234; GO:0098978; GO:0005770; GO:0005764; GO:0005743; GO:0005739; GO:0043005; GO:0005634; GO:0048471; GO:0005886; GO:0002102; GO:0014069; GO:0099091; GO:0032587	GO:0005524; GO:0045296; GO:0071253; GO:0019899; GO:0046875; GO:0030331; GO:0070851; GO:0020037; GO:0051427; GO:0005158; GO:0005178; GO:0044325; GO:0016301; GO:0019900; GO:0004715; GO:0046934; GO:0051219; GO:0008022; GO:0004672; GO:0005080; GO:0004713; GO:0097110; GO:0042169; GO:0005070; GO:0005102; GO:0031625	GO:0032148; GO:0034332; GO:0086098; GO:0007411; GO:0045453; GO:0060444; GO:0098609; GO:0007049; GO:0008283; GO:0071398; GO:0071498; GO:0071456; GO:0032869; GO:0071222; GO:0071375; GO:0036120; GO:0071393; GO:0034614; GO:0007417; GO:0035635; GO:0048013; GO:0007173; GO:0038096; GO:0030900; GO:0045087; GO:0007229; GO:0030520; GO:0035556; GO:0050900; GO:0016236; GO:2000811; GO:0043066; GO:0043154; GO:…
2487	1241	PK822	Syk	Y352	Spleen protein-tyrosine kinase	1129.51	29.434	996.297	76.0615	-11.7941		1954.86	0.979408	73.0707	Possible		SYK	X	PYK	Protein kinase - Non-receptor-tyrosine kinase	Protein-tyrosine kinase	TK	Syk							ESP(pY)ADP(bA)C	Corresponds to amino acid residues E349 to P355; In the region between the SH2 and kinase catalytic domains.	Y352 phosphorylation stimulates phosphotransferase activity and regulates molecular association, including inducing interaction with ITGAM, PLCG1, and CLTC. This is one of the major sites of in vivo phosphorylation of Syk.	Lck; Lyn; Syk	EC 2.7.10.2; Protein kinase, tyrosine (non-receptor); TK group; Syk family	P43405	P43405	P43405	P43405	GO:0019815; GO:0005737; GO:0005829; GO:0032009; GO:0031234; GO:0005634; GO:0005886; GO:0032991; GO:0042101	GO:0005524; GO:0005178; GO:0004715; GO:0019902; GO:0001784; GO:0004672; GO:0019901; GO:0004674; GO:0004713; GO:0042169; GO:0035325	GO:0007257; GO:0002250; GO:0001525; GO:0009887; GO:0050853; GO:0043366; GO:0048514; GO:0008283; GO:0071404; GO:0071226; GO:0038063; GO:0042742; GO:0038095; GO:0038096; GO:0006954; GO:0045087; GO:0007229; GO:0038110; GO:0038156; GO:0002366; GO:0007159; GO:0019370; GO:0001945; GO:0002281; GO:0002283; GO:0030593; GO:0018105; GO:0038083; GO:0030168; GO:0046638; GO:0046641; GO:0045579; GO:0045780; GO:…
2489	1242	PK823	Syk	Y525+Y526	Spleen protein-tyrosine kinase	474.175	7.73119	491.205	0.648796	3.59154		728.11	1.9526	53.5531	Possible		SYK	X	PYK	Protein kinase - Non-receptor-tyrosine kinase	Protein-tyrosine kinase	TK	Syk							DEN(pY)(pY)KAQ(bA)C	Corresponds to amino acid residues D522 to Q529; In protein kinase catalytic domain activation T-loop between subdomains VII and VIII.	Y525 and Y526 phosphorylation stimulate phosphotransferase activity. These phosphosites are located in the kinase activation loop between catalytic subdomains VII and VIII. This is one of the major sites of in vivo phosphorylation of Syk(≥XXX reports from high throughput mass spectrometry studies).	Y525: Syk. Y526: Syk.	EC 2.7.10.2; Protein kinase, tyrosine (non-receptor); TK group; Syk family	P43405	P43405	P43405	P43405	GO:0019815; GO:0005737; GO:0005829; GO:0032009; GO:0031234; GO:0005634; GO:0005886; GO:0032991; GO:0042101	GO:0005524; GO:0005178; GO:0004715; GO:0019902; GO:0001784; GO:0004672; GO:0019901; GO:0004674; GO:0004713; GO:0042169; GO:0035325	GO:0007257; GO:0002250; GO:0001525; GO:0009887; GO:0050853; GO:0043366; GO:0048514; GO:0008283; GO:0071404; GO:0071226; GO:0038063; GO:0042742; GO:0038095; GO:0038096; GO:0006954; GO:0045087; GO:0007229; GO:0038110; GO:0038156; GO:0002366; GO:0007159; GO:0019370; GO:0001945; GO:0002281; GO:0002283; GO:0030593; GO:0018105; GO:0038083; GO:0030168; GO:0046638; GO:0046641; GO:0045579; GO:0045780; GO:…
2503	1249	NK087-2	TAO3 (JIK, TAOK3)	Pan-specific	Serine/threonine-protein kinase TAO3	622.555	0.866218	695.243	2.15398	11.6757		911.357	5.57524	46.3897	Possible		TAO3	X	PSTK	Protein kinase - Non-receptor protein-serine/threonine	Protein-serine/threonine kinase	STE	STE20	TAO						CSEHGTSLNREMDSLGSNHS	Corresponds to amino acid residues S331 to S349; After catalytic domain.			Protein kinase, Ser/Thr (non-receptor); EC 2.7.11.1; STE domain target; STE</A> group; STE20 family; TAO subfamily	Q9H2K8	Q9H2K8	Q9H2K8	Q9H2K8	GO:0005737; GO:0005886	GO:0005524; GO:0004709; GO:0004860; GO:0004674; GO:0016740	GO:0006974; GO:0006281; GO:0000165; GO:0007095; GO:0046329; GO:0007399; GO:0046330; GO:0043507; GO:0032874; GO:0046777; GO:0006468; GO:0042981
2553	1274	PK833	TRIM28 (TIF1B)	S473	Transcription intermediary factor 1-beta	1107.5	0.213079	861	2.56015	-22.2574		1703.71	10.6245	53.8337	Possible		TIF1b	X	PSTK	Protein kinase - Non-receptor protein-serine/threonine	Protein-serine/threonine kinase	Atypical	TIF1		X					RSR(pS)GEG(bA)C	Corresponds to amino acid residues R470 to G476; In the mid-region of the protein kinase between the zf-B_box and PHD domains.	S473 phosphorylation stimulates transcription and induces DNA repair and inhibits interaction with HP1-alpha. This is one of the major sites of in vivo phosphorylation of TRIM28.	Chk1 (CHEK1)	Protein kinase, atypical; Nuclear receptor co-regulator; Transcription, coactivator/corepressor; ATYPICAL domain target; ATYPICAL</A> group; TIF1 family	Q13263	Q13263	Q13263		GO:0005719; GO:0005720; GO:0005654; GO:0005634; GO:0090575	GO:0003682; GO:0070087; GO:0003677; GO:0003700; GO:0035851; GO:1990841; GO:0004672; GO:0003723; GO:0043565; GO:0019789; GO:0003713; GO:0003714; GO:0031625; GO:0004842; GO:0008270	GO:0006325; GO:0060028; GO:0043045; GO:0006281; GO:0007566; GO:0060669; GO:0001837; GO:0045087; GO:1901536; GO:0045869; GO:0045892; GO:0000122; GO:1902187; GO:0043388; GO:0045739; GO:0090309; GO:0042307; GO:0045893; GO:0046777; GO:0051259; GO:0016925; GO:0007265; GO:2000653; GO:0006367; GO:0016032
2673	1335	PN681	YAP1	S109	Yorkie homologue	8013.12	9.97267	12041.8	9.49649	50.2761	Possible	8213.28	1.68291	2.4979						Transcription, coactivator/corepressor					X					SRQA(pS)TDAGC	Corresponds to amino acid residues S105 to G113.	S109 phosphorylation promotes nuclear export. This is one of the major sites of in vivo phosphorylation of YAP1.	LATS1; LATS2 (KPM)	Transcription, coactivator/corepressor	P46937	P46937		P46937	GO:0005737; GO:0005829; GO:0016020; GO:0005654; GO:0005634; GO:0071148; GO:0071149	GO:0033613; GO:0003682; GO:0070064; GO:0008022; GO:0046982; GO:0000978; GO:0003713; GO:0003714; GO:0001076; GO:0044212	GO:0060449; GO:0061026; GO:0000902; GO:0008283; GO:0006974; GO:0071480; GO:0071300; GO:0060242; GO:0003143; GO:0003015; GO:0035329; GO:0030216; GO:0048368; GO:0060487; GO:0030857; GO:2001237; GO:2000737; GO:0030903; GO:0048339; GO:0090263; GO:0060045; GO:0033148; GO:1902459; GO:0045893; GO:0045944; GO:0050847; GO:0065003; GO:1902036; GO:0010837; GO:0072307; GO:0050767; GO:0072091; GO:0032570; GO:…

## Sheet: Normalized Full Values
												Globally Normalized Values for the signal intensity of samples analyzed with the KAM-1325 antibody microarray data were colourized using the Conditional Formatting feature under Format in the pull down menu of MS-Excel. This feature lets users colourize cells in the spreadsheet according to their desired criteria. In the case of your data, the Globally Normalized intensity signals with a value of…
												The Conditional Formatting feature for %CFC (change from control) is set to blue for -100%, white for 0 changes, and orange for +200%. In this case, it is best to focus on orange coloured cells for follow up immunoblotting studies.
Normalized Full Values for Order 4047
KAM-1325 ARRAY DETAILS												Lead Selection Recommendation for Follow Up Immunoblotting
Sample IDs:		Control ID: Hec50 CT (Kinexus ID: 20589) vs Treated ID: Hec50 bev (Kineuxs ID: 20590) vs Hec50 cediranib (Kinexus ID: 20591)										Priority	lead selection criteria: %CFC ≥75%; Sum of %Error <75% of %CFC; Average Normalized Net Signal ≥1500
Array Barcode:		K01803-1273, -1279		Protocol: Chemical cleavage pre-homogenization: Biotin-labelling								Possible	lead selection criteria: %CFC ≥45% + <75%; Sum of %Errors <80% of %CFC; Average Normalized Net Signal ≥750
Date of Report:		2020-02-21		Reviewed by: Dr. Steven Pelech
												Globally Normalized Median									Globally Normalized Median												Globally Normalized Median
						Sample ID: Hec50 CT (#20589)						4192.27			Sample ID: Hec50 Bev (#20590)						4042.85			Changes			Sample ID: Hec50 Cediranib (#20591)						4254.79			Changes
Final Sort	Ab Spot ID #	Antibody Codes	Target Name	P-Site	Full Target Protein Name	Flag	Signal Median	Background Median	Spot Area	Not Normalized Net Signal	Normalized Net Signal	Average Normalized Net Signal	Error in Duplicate from Average	% Error in Duplicate from Average	Flag	Signal Median	Background Median	Spot Area	Not Normalized Net Signal	Normalized Net Signal	Average Normalized Net Signal	Error in Duplicate from Average	% Error in Duplicate from Average	SUM % Error	%CFC	Lead	Flag	Signal Median	Background Median	Spot Area	Not Normalized Net Signal	Normalized Net Signal	Average Normalized Net Signal	Error in Duplicate from Average	% Error in Duplicate from Average	SUM % Error	%CFC	Lead		Preferred Protein Kinase Name	Protein Kinase	Kinase or Phosphatase Type	Protein Type	Kinase Type	Kinase Group	Kinase Family	Kinase Subfamily	Transcription Factor	Stress Protein
5	2	NN166-2	4E-BP1 (PHAS1)	Pan-specific	Eukaryotic translation initiation factor 4E binding protein 1 (PHAS1)	0	598	58	391	211.14	371.004	467.757	96.7529	20.6844	0	310	52	414	106.812	186.624	209.921	23.2974	11.0982	31.7826	-55.1218		0	602	50	378	208.656	356.977	389.216	32.2391	8.28308	28.9675	-16.7909
6	2	NN166-2	4E-BP1 (PHAS1)	Pan-specific	Eukaryotic translation initiation factor 4E binding protein 1 (PHAS1)	0	715	30	469	321.265	564.51				0	516	46	284	133.48	233.218							0	708	44	371	246.344	421.456
7	3	PN550	4E-BP1 (PHAS1)	T37+T46	4E transcription factor binding protein 1	0	6899	20	586	4031.09	7083.22	6982.21	101.017	1.44677	0	7145	18	524	3734.55	6525.06	6015.82	509.24	8.46501	9.91178	-13.8407		0	7224	18	600	4323.6	7396.99	6393.32	1003.68	15.6988	17.1456	-8.43414
8	3	PN550	4E-BP1 (PHAS1)	T37+T46	4E transcription factor binding protein 1	0	6534	18	601	3916.12	6881.19				0	6112	16	517	3151.63	5506.58							0	6312	24	501	3150.29	5389.64
9	4	PK501	A6 (Twinfilin-1)	Y309	Twinfilin, actin-binding protein, 1; Protein tyrosine kinase 9;	0	8468	18	677	5720.65	10052	10171.1	119.092	1.17089	0	6864	14	545	3733.25	6522.79	6739.89	217.104	3.22117	4.39206	-33.7349		0	8778	16	722	6326.16	10823.1	9066.92	1756.14	19.3687	20.5395	-10.8562			A6	X	PSTK	Protein kinase, dual-specificity	Protein-serine/threonine kinase	ATYPICAL	A6 family
10	4	PK501	A6 (Twinfilin-1)	Y309	Twinfilin, actin-binding protein, 1; Protein tyrosine kinase 9;	0	7966	20	737	5856.2	10290.2				0	6127	20	652	3981.76	6957							0	6572	18	652	4273.21	7310.78								A6	X	PSTK	Protein kinase, dual-specificity	Protein-serine/threonine kinase	ATYPICAL	A6 family
11	5	PK502	A6r (Twinfin-2)	Y309	Twinfilin, actin-binding protein, 2; Protein tyrosine kinase 9-like	0	5234	14	681	3554.82	6246.34	5687.38	558.959	9.82805	0	5488	12	514	2814.66	4917.82	4692.61	225.216	4.79938	14.6274	-17.4909		0	5108	14	633	3224.5	5516.61	4956.9	559.716	11.2917	21.1197	-12.844			A6r	X	PSTK	Protein kinase, dual-specificity	Protein-serine/threonine kinase	ATYPICAL	A6 family
12	5	PK502	A6r (Twinfin-2)	Y309	Twinfilin, actin-binding protein, 2; Protein tyrosine kinase 9-like	0	4550	18	644	2918.61	5128.42				0	4459	20	576	2556.86	4467.39							0	4567	18	565	2570.18	4397.18								A6r	X	PSTK	Protein kinase, dual-specificity	Protein-serine/threonine kinase	ATYPICAL	A6 family
13	6	PK503	AAK1	S637	AP2-associated protein kinase 1	0	7593	12	704	5337.02	9377.94	8966.07	411.861	4.59355	0	399	8	917	358.547	626.459	3331.97	2705.51	81.1985	85.7921	-62.838		0	7442	12	677	5030.11	8605.72	5039.88	3565.84	70.7525	75.346	-43.7894			AAK1	X	PSTK	Protein kinase - Non-receptor protein-serine/threonine	Protein-serine/threonine kinase	Other	NAK
14	6	PK503	AAK1	S637	AP2-associated protein kinase 1	0	7866	14	620	4868.24	8554.21				0	6370	18	544	3455.49	6037.48							0	1062	10	819	861.588	1474.04								AAK1	X	PSTK	Protein kinase - Non-receptor protein-serine/threonine	Protein-serine/threonine kinase	Other	NAK
15	7	NK001-2	Abl (Abl1)	Pan-specific	Abelson murine leukemia viral oncogene homologue 1	0	6012	12	654	3924	6895.04	6926.25	31.2069	0.45056	0	5519	12	562	3094.93	5407.52	5498.57	91.0509	1.6559	2.10646	-20.6127		0	5742	10	559	3204.19	5481.86	5514.81	32.9517	0.597512	1.04807	-20.3782			ABL1	X	PYK	Protein kinase - Non-receptor-tyrosine kinase	Protein-tyrosine kinase	TK	Abl
16	7	NK001-2	Abl (Abl1)	Pan-specific	Abelson murine leukemia viral oncogene homologue 1	0	5854	14	678	3959.52	6957.46				0	4798	16	669	3199.16	5589.62							0	5155	16	631	3242.71	5547.76								ABL1	X	PYK	Protein kinase - Non-receptor-tyrosine kinase	Protein-tyrosine kinase	TK	Abl
17	8	NK001-6	Abl (Abl1)	Pan-specific	Abelson murine leukemia viral oncogene homologue 1	0	5444	14	569	3089.67	5429	5446.19	17.1867	0.315572	0	4590	10	481	2202.98	3849.08	3511.41	337.672	9.61643	9.932	-35.5254		0	4756	10	463	2197.4	3759.4	3601.91	157.492	4.37245	4.68802	-33.8637			ABL1	X	PYK	Protein kinase - Non-receptor-tyrosine kinase	Protein-tyrosine kinase	TK	Abl
18	8	NK001-6	Abl (Abl1)	Pan-specific	Abelson murine leukemia viral oncogene homologue 1	0	5492	18	568	3109.23	5463.38				0	4015	14	454	1816.45	3173.74							0	4518	14	447	2013.29	3444.42								ABL1	X	PYK	Protein kinase - Non-receptor-tyrosine kinase	Protein-tyrosine kinase	TK	Abl
19	9	PK504	Abl (Abl1)	Y139	Abelson murine leukemia viral oncogene homologue 1	0	5330	14	779	4141.16	7276.63	5652.84	1623.79	28.7252	0	4917	14	581	2848.64	4977.19	4543.04	434.156	9.55651	38.2817	-19.6327		0	5420	11	658	3559.12	6089.09	4786.03	1303.06	27.2263	55.9516	-15.334			ABL1	X	PYK	Protein kinase - Non-receptor-tyrosine kinase	Protein-tyrosine kinase	TK	Abl
20	9	PK504	Abl (Abl1)	Y139	Abelson murine leukemia viral oncogene homologue 1	0	3802	12	605	2292.95	4029.05				0	3942	16	599	2351.67	4108.88							0	3502	16	584	2035.82	3482.97								ABL1	X	PYK	Protein kinase - Non-receptor-tyrosine kinase	Protein-tyrosine kinase	TK	Abl
21	10	PK505	Abl (Abl1)	Y226	Abelson murine leukemia viral oncogene homologue 1	0	8236	20	686	5636.18	9903.59	10521.6	617.982	5.87348	0	9316	16	617	5738.1	10025.7	8679.02	1346.67	15.5164	21.3899	-17.5121		0	8286	14	638	5277.54	9029.03	8328.87	700.158	8.4064	14.2799	-20.8401			ABL1	X	PYK	Protein kinase - Non-receptor-tyrosine kinase	Protein-tyrosine kinase	TK	Abl
22	10	PK505	Abl (Abl1)	Y226	Abelson murine leukemia viral oncogene homologue 1	0	7721	18	823	6339.57	11139.6				0	6962	14	604	4196.59	7332.35							0	7208	16	620	4459.04	7628.71								ABL1	X	PYK	Protein kinase - Non-receptor-tyrosine kinase	Protein-tyrosine kinase	TK	Abl
23	11	PK506	Abl (Abl1)	Y257	Abelson murine leukemia viral oncogene homologue 1	0	5680	18	623	3527.43	6198.21	6849.36	651.149	9.50673	0	7338	14	655	4797.22	8381.78	7043.63	1338.15	18.998	28.5047	2.83635		0	6212	12	653	4048.6	6926.51	6512.98	413.536	6.34942	15.8561	-4.9111			ABL1	X	PYK	Protein kinase - Non-receptor-tyrosine kinase	Protein-tyrosine kinase	TK	Abl
24	11	PK506	Abl (Abl1)	Y257	Abelson murine leukemia viral oncogene homologue 1	0	6401	30	670	4268.57	7500.5				0	5606	24	585	3265.47	5705.48							0	5677	18	630	3565.17	6099.44								ABL1	X	PYK	Protein kinase - Non-receptor-tyrosine kinase	Protein-tyrosine kinase	TK	Abl
25	12	PK507	Abl (Abl1)	Y264	Abelson murine leukemia viral oncogene homologue 1	0	6230	18	683	4242.8	7455.22	7164.98	290.24	4.05082	0	7626	14	679	5168.55	9030.57	6984.35	2046.22	29.2972	33.348	-2.52101		0	6173	13	684	4213.44	7208.53	6995.51	213.02	3.0451	7.09592	-2.36523			ABL1	X	PYK	Protein kinase - Non-receptor-tyrosine kinase	Protein-tyrosine kinase	TK	Abl
26	12	PK507	Abl (Abl1)	Y264	Abelson murine leukemia viral oncogene homologue 1	0	5676	14	691	3912.44	6874.74				0	3038	12	934	2826.28	4938.13							0	5712	16	696	3964.42	6782.49								ABL1	X	PYK	Protein kinase - Non-receptor-tyrosine kinase	Protein-tyrosine kinase	TK	Abl
27	13	PK873	Abl (Abl1)	Y393+T394	Abelson murine leukemia viral oncogene homologue 1	0	12652	32	822	10373.6	18228	19784.1	1556.09	7.86538	0	16784	44	733	12270.4	21439.1	21219.1	219.915	1.0364	8.90177	7.25353		0	15314	62	685	10447.6	17874.2	18350.6	476.429	2.59625	10.4616	-7.24548			ABL1	X	PYK	Protein kinase - Non-receptor-tyrosine kinase	Protein-tyrosine kinase	TK	Abl
28	13	PK873	Abl (Abl1)	Y393+T394	Abelson murine leukemia viral oncogene homologue 1	0	15243	62	800	12144.8	21340.2				0	15528	40	776	12018.7	20999.2							0	14892	81	743	11004.6	18827.1								ABL1	X	PYK	Protein kinase - Non-receptor-tyrosine kinase	Protein-tyrosine kinase	TK	Abl
29	14	PK177	Abl (Abl1)	Y413	Abelson murine leukemia viral oncogene homologue 1	0	842	122	442	318.24	559.194	582.326	23.1311	3.97219	0	330	60	505	136.35	238.233	233.175	5.05819	2.16927	6.14146	-59.958		0	457	52	511	206.955	354.067	342.66	11.407	3.32896	7.30116	-41.1566			ABL1	X	PYK	Protein kinase - Non-receptor-tyrosine kinase	Protein-tyrosine kinase	TK	Abl
30	14	PK177	Abl (Abl1)	Y413	Abelson murine leukemia viral oncogene homologue 1	0	648	62	588	344.568	605.457				0	388	48	384	130.56	228.116							0	460	40	461	193.62	331.253								ABL1	X	PYK	Protein kinase - Non-receptor-tyrosine kinase	Protein-tyrosine kinase	TK	Abl
31	15	PK508	Abl (Abl1)	Y469	Abelson murine leukemia viral oncogene homologue 1	0	9272	22	667	6169.75	10841.2	11738.6	897.401	7.6449	0	13265	30	609	8060.11	14082.8	10862.2	3220.6	29.6497	37.2946	-7.46601		0	9464	22	651	6146.74	10516.1	9680.36	835.744	8.6334	16.2783	-17.5337			ABL1	X	PYK	Protein kinase - Non-receptor-tyrosine kinase	Protein-tyrosine kinase	TK	Abl
32	15	PK508	Abl (Abl1)	Y469	Abelson murine leukemia viral oncogene homologue 1	0	6968	20	1035	7191.18	12636				0	7870	18	557	4373.56	7641.56							0	7996	18	648	5169.74	8844.61								ABL1	X	PYK	Protein kinase - Non-receptor-tyrosine kinase	Protein-tyrosine kinase	TK	Abl
33	16	NK238-1	Abl2 (Arg)	Pan-specific	Abelson murine leukemia viral oncogene homologue 2	0	8107	16	732	5922.61	10406.9	10928.3	521.405	4.77114	0	6600	16	554	3647.54	6373.03	7048.05	675.024	9.57746	14.3486	-35.5064		0	7084	18	587	4147.74	7096.13	7649.62	553.488	7.2355	12.0066	-30.0018			ARG	X	PYK	Protein kinase - Non-receptor-tyrosine kinase	Protein-tyrosine kinase	TK	Abl
34	16	NK238-1	Abl2 (Arg)	Pan-specific	Abelson murine leukemia viral oncogene homologue 2	0	8681	16	752	6516.08	11449.7				0	7470	16	593	4420.22	7723.08							0	7994	16	601	4794.78	8203.1								ARG	X	PYK	Protein kinase - Non-receptor-tyrosine kinase	Protein-tyrosine kinase	TK	Abl
35	17	PK509	Abl2 (Arg)	Y439	Abelson murine leukemia viral oncogene homologue 2	0	3079	20	623	1905.76	3348.7	3312.83	35.8607	1.08248	0	1764	16	453	791.844	1383.52	1471.53	88.0072	5.98067	7.06314	-55.581	Possible	0	2764	18	496	1362.02	2330.19	2192.2	137.99	6.29456	7.37704	-33.8269			ARG	X	PYK	Protein kinase - Non-receptor-tyrosine kinase	Protein-tyrosine kinase	TK	Abl
36	17	PK509	Abl2 (Arg)	Y439	Abelson murine leukemia viral oncogene homologue 2	0	2707	12	692	1864.94	3276.97				0	1949	17	462	892.584	1559.54							0	2350	14	514	1200.7	2054.21								ARG	X	PYK	Protein kinase - Non-receptor-tyrosine kinase	Protein-tyrosine kinase	TK	Abl
37	18	PK510	Abl2 (Arg)	Y439+T440	Abelson murine leukemia viral oncogene homologue 2	0	11844	14	725	8576.75	15070.6	17764.6	2694.02	15.1651	0	12652	18	619	7820.45	13664	14055	390.987	2.78183	17.9469	-20.8822		0	12843	16	752	9645.9	16502.6	14179.6	2322.96	16.3824	31.5474	-20.1804			ARG	X	PYK	Protein kinase - Non-receptor-tyrosine kinase	Protein-tyrosine kinase	TK	Abl
38	18	PK510	Abl2 (Arg)	Y439+T440	Abelson murine leukemia viral oncogene homologue 2	0	15022	18	776	11643.1	20458.6				0	15616	16	530	8268	14446							0	11156	14	622	6930.32	11856.7								ARG	X	PYK	Protein kinase - Non-receptor-tyrosine kinase	Protein-tyrosine kinase	TK	Abl
39	19	NN390-1	ACC1 (ACACA)	Pan-specific	Acetyl-CoA carboxylase 1	0	336	12	594	192.456	338.173	342.327	4.1539	1.21343	0	202	8	471	91.374	159.65	141.572	18.0784	12.7698	13.9832	-58.6444		0	309	12	508	150.876	258.125	238.337	19.7876	8.30235	9.51578	-30.3774
40	19	NN390-1	ACC1 (ACACA)	Pan-specific	Acetyl-CoA carboxylase 1	0	330	14	624	197.184	346.481				0	164	12	465	70.68	123.493							0	266	10	499	127.744	218.55
41	20	PN733	ACC1 (ACACA)	S29	Acetyl-CoA carboxylase 1	0	1228	12	578	702.848	1235.01	1178.37	56.6328	4.80601	0	756	12	448	333.312	582.368	577.629	4.73845	0.820327	5.62634	-50.9808	Possible	0	1072	14	500	529	905.035	798.901	106.134	13.285	18.091	-32.2031						Fatty acid synthesis
42	20	PN733	ACC1 (ACACA)	S29	Acetyl-CoA carboxylase 1	0	1038	10	621	638.388	1121.74				0	804	12	414	327.888	572.891							0	898	10	456	404.928	692.768											Fatty acid synthesis
43	21	PN202	ACC1 (ACACA)	S78+S80	Acetyl-CoA carboxylase 1	0	840	14	748	617.848	1085.65	954.013	131.637	13.7982	0	532	7	526	276.15	482.493	506.135	23.6416	4.671	18.4692	-46.9467	Possible	0	792	10	567	443.394	758.577	660.561	98.0158	14.8383	28.6365	-30.7598
44	21	PN202	ACC1 (ACACA)	S78+S80	Acetyl-CoA carboxylase 1	0	654	12	729	468.018	822.376				0	353	10	884	303.212	529.777							0	574	10	583	328.812	562.545
45	22	PN002	ACC1 (ACACA)	S80	Acetyl-CoA carboxylase 1	0	7712	16	428	3293.89	5787.85	5416.29	371.557	6.86	0	9844	16	354	3479.11	6078.76	5205.71	873.05	16.771	23.631	-3.88791		0	7775	14	346	2685.31	4594.13	3994.19	599.942	15.0204	21.8804	-26.2559
46	22	PN002	ACC1 (ACACA)	S80	Acetyl-CoA carboxylase 1	0	7066	12	407	2870.98	5044.73				0	7644	14	325	2479.75	4332.66							0	5746	12	346	1983.96	3394.25
47	23	PN734	ACC2 (ACACB)	T1342	Acetyl CoA carboxylase beta	0	14294	16	781	11151.1	19594.2	19931.4	337.249	1.69205	0	15634	20	655	10227.2	17869.1	17510.5	358.563	2.04771	3.73975	-12.1462		0	14962	10	702	10496.3	17957.5	15946.6	2010.88	12.6101	14.3021	-19.9924						Fatty acid synthesis
48	23	PN734	ACC2 (ACACB)	T1342	Acetyl CoA carboxylase beta	0	14564	18	793	11535	20268.7				0	14780	18	665	9816.73	17151.9							0	12433	16	656	8145.55	13935.7											Fatty acid synthesis
49	24	NK002	ACK1 (TNK2)	Pan-specific	Activated CDC42 kinase 1	0	498	20	683	326.474	573.663	505.027	68.6359	13.5905	0	474	14	659	303.14	529.651	423.333	106.318	25.1145	38.7051	-16.1762		0	476	12	589	273.296	467.566	424.918	42.6479	10.0367	23.6273	-15.8622			ACK1	X	PYK	Protein kinase - Non-receptor protein-tyrosine	Protein-tyrosine kinase	TK	Ack
50	24	NK002	ACK1 (TNK2)	Pan-specific	Activated CDC42 kinase 1	0	432	16	597	248.352	436.391				0	338	18	567	181.44	317.015							0	406	14	570	223.44	382.27								ACK1	X	PYK	Protein kinase - Non-receptor protein-tyrosine	Protein-tyrosine kinase	TK	Ack
51	25	PK511	ACK1 (TNK2)	Y284	Activated CDC42 kinase 1	0	9222	22	737	6780.4	11914.2	11840	74.1867	0.626579	0	10218	20	791	8066.62	14094.1	12698.1	1395.99	10.9937	11.6202	7.24796		0	9833	18	798	7832.37	13399.9	12656.5	743.444	5.87401	6.50059	6.89635			ACK1	X	PYK	Protein kinase - Non-receptor protein-tyrosine	Protein-tyrosine kinase	TK	Ack
52	25	PK511	ACK1 (TNK2)	Y284	Activated CDC42 kinase 1	0	9178	18	731	6695.96	11765.8				0	8926	16	726	6468.66	11302.1							0	9292	20	751	6963.27	11913.1								ACK1	X	PYK	Protein kinase - Non-receptor protein-tyrosine	Protein-tyrosine kinase	TK	Ack
53	26	PK512	ACK1 (TNK2)	Y518	Activated CDC42 kinase 1	0	16844	22	858	14433.3	25361.4	23262.7	2098.68	9.02166	0	15014	24	674	10103.3	17652.6	17469.7	182.912	1.04703	10.0687	-24.9027		0	13762	20	792	10883.7	18620.2	17642.9	977.299	5.53933	14.561	-24.1579			ACK1	X	PYK	Protein kinase - Non-receptor protein-tyrosine	Protein-tyrosine kinase	TK	Ack
54	26	PK512	ACK1 (TNK2)	Y518	Activated CDC42 kinase 1	0	16060	22	751	12044.5	21164				0	14034	20	706	9893.88	17286.7							0	13166	20	741	9741.19	16665.6								ACK1	X	PYK	Protein kinase - Non-receptor protein-tyrosine	Protein-tyrosine kinase	TK	Ack
55	27	PK513	ACK1 (TNK2)	Y859+Y860	Activated CDC42 kinase 1	0	9507	22	702	6658.47	11699.9	11829.1	129.199	1.09222	0	12158	18	594	7211.16	12599.4	10864.4	1735.04	15.97	17.0622	-8.15534		0	9380	16	598	5599.67	9580.15	8755.63	824.523	9.41706	10.5093	-25.9824			ACK1	X	PYK	Protein kinase - Non-receptor protein-tyrosine	Protein-tyrosine kinase	TK	Ack
56	27	PK513	ACK1 (TNK2)	Y859+Y860	Activated CDC42 kinase 1	0	8604	22	793	6805.53	11958.3				0	8432	18	621	5225.09	9129.36							0	7902	18	588	4635.79	7931.1								ACK1	X	PYK	Protein kinase - Non-receptor protein-tyrosine	Protein-tyrosine kinase	TK	Ack
57	28	PN735	ACLY	S455	ATP-citrate synthase	0	8570	14	645	5518.62	9697.03	8749.8	947.229	10.8257	0	8396	14	554	4643.63	8113.42	7787.19	326.229	4.1893	15.015	-11.0015		0	8192	16	575	4701.2	8043.01	7579.06	463.949	6.12145	16.9472	-13.3802						Enzyme - Fatty acid synthesis
58	28	PN735	ACLY	S455	ATP-citrate synthase	0	7822	18	569	4440.48	7802.57				0	7651	12	559	4270.2	7460.96							0	7671	12	543	4158.84	7115.11											Enzyme - Fatty acid synthesis
59	29	PN686	ACLY	Y682	ATP-citrate synthase	0	10752	18	812	8716.01	15315.3	12899.6	2415.71	18.727	0	9916	16	568	5623.2	9824.94	10717.1	892.201	8.32499	27.052	-16.9188		0	10313	14	604	6220.6	10642.5	10614.5	27.9517	0.263335	18.9904	-17.7144						Enzyme - Fatty acid synthesis
60	29	PN686	ACLY	Y682	ATP-citrate synthase	0	9927	16	602	5966.42	10483.9				0	10116	18	658	6644.48	11609.3							0	10504	16	590	6187.92	10586.5											Enzyme - Fatty acid synthesis
61	30	PN736	ACO1	S711	Cytoplasmic aconitate hydratase	0	8662	14	608	5257.98	9239.05	8785.84	453.207	5.15838	0	9735	14	591	5745.11	10037.9	10642.4	604.488	5.67998	10.8384	21.1316		0	9072	14	575	5208.35	8910.66	8335.93	574.733	6.89465	12.053	-5.12092						Enzyme
62	30	PN736	ACO1	S711	Cytoplasmic aconitate hydratase	0	7788	14	610	4742.14	8332.64				0	8762	16	736	6437.06	11246.9							0	7714	12	589	4536.48	7761.19											Enzyme
63	31	PN737	ACO1	S806	Cytoplasmic aconitate hydratase	0	5792	18	595	3435.53	6036.73	5623.48	413.251	7.34867	0	7258	16	543	3932.41	6870.76	6294.82	575.943	9.14949	16.4982	11.9381		0	6320	12	592	3734.34	6388.86	5425.74	963.12	17.751	25.0996	-3.51638						Enzyme
64	31	PN737	ACO1	S806	Cytoplasmic aconitate hydratase	0	4810	12	618	2965.16	5210.23				0	5224	12	628	3273.14	5718.87							0	4744	10	551	2608.43	4462.62											Enzyme
65	32	PN687	ACP1	Y132+Y133	Low molecular weight phosphotyrosine protein phosphatase	0	1924	16	564	1076.11	1890.89	1800.68	90.2049	5.00948	0	1264	10	486	609.444	1064.83	1410.64	345.815	24.5147	29.5242	-21.6605		0	1884	12	544	1018.37	1742.27	1682.49	59.7717	3.55256	8.56205	-6.56349						Phosphatase
66	32	PN687	ACP1	Y132+Y133	Low molecular weight phosphotyrosine protein phosphatase	0	1702	12	576	973.44	1710.48				0	1713	12	591	1005.29	1756.46							0	1775	12	538	948.494	1622.72											Phosphatase
67	33	PN688	ACS1 (ACSL1)	Y567	Long-chain-fatty-acid--CoA ligase 1	0	6466	12	637	4111.2	7223.98	8179.22	955.24	11.6789	0	6323	14	572	3608.75	6305.26	6897.24	591.98	8.58286	20.2617	-15.6736		0	6867	14	637	4365.36	7468.44	6958.56	509.879	7.32737	19.0062	-14.9239						Enzyme - Fatty acid synthesis
68	33	PN688	ACS1 (ACSL1)	Y567	Long-chain-fatty-acid--CoA ligase 1	0	7548	14	690	5198.46	9134.46				0	6641	16	647	4286.38	7489.22							0	5920	12	638	3769.3	6448.68											Enzyme - Fatty acid synthesis
69	34	NN218-1	ACTB	Pan-specific	Actin, cytoplasmic 1; Beta-actin	0	1804	10	347	622.518	1093.86	577.148	516.707	89.5277	0	3244	10	325	1051.05	1836.41	1404.98	431.435	30.7076	120.235	143.434		0	1820	10	312	564.72	966.146	510.832	455.315	89.1321	178.66	-11.4904						Cytoskeletal/contractile protein
70	34	NN218-1	ACTB	Pan-specific	Actin, cytoplasmic 1; Beta-actin	0	63	10	649	34.397	60.4406				0	1586	12	354	557.196	973.541							0	58	8	649	32.45	55.5168											Cytoskeletal/contractile protein
71	35	PN501	ACTB	Y53	Actin, cytoplasmic 1; Beta-actin	0	2693	16	688	1841.78	3236.27	3233.14	3.13124	0.0968481	0	2476	14	573	1410.73	2464.84	2724.04	259.194	9.51508	9.61193	-15.7464		0	3081	14	644	1975.15	3379.16	2998.02	381.148	12.7133	12.8102	-7.27228						Cytoskeletal/contractile protein
72	35	PN501	ACTB	Y53	Actin, cytoplasmic 1; Beta-actin	0	2560	14	722	1838.21	3230.01				0	2402	14	715	1707.42	2983.23							0	2417	12	636	1529.58	2616.87											Cytoskeletal/contractile protein
73	36	PN500	ACTB	Y294	Actin, cytoplasmic 1; Beta-actin	0	7166	14	774	5535.65	9726.95	9715.38	11.5655	0.119044	0	7563	18	666	5024.97	8779.7	9805.49	1025.79	10.4614	10.5804	0.927497		0	7632	16	751	5719.62	9785.36	9215.33	570.025	6.18562	6.30466	-5.147						Cytoskeletal/contractile protein
74	36	PN500	ACTB	Y294	Actin, cytoplasmic 1; Beta-actin	0	7078	16	782	5522.48	9703.82				0	6928	17	897	6199.17	10831.3							0	6812	20	744	5053.25	8645.31											Cytoskeletal/contractile protein
75	37	PN502	ACTN1	Y246	Alpha-actinin-1	0	10630	22	814	8634.91	15172.8	15583.3	410.441	2.63386	0	11754	18	744	8731.58	15256	14882.5	373.436	2.50922	5.14309	-4.49669		0	10854	16	798	8648.72	14796.6	14342.1	454.539	3.16927	5.80314	-7.96492						Cytoskeletal/contractile protein
76	37	PN502	ACTN1	Y246	Alpha-actinin-1	0	10956	16	832	9102.08	15993.7				0	10270	18	810	8304.12	14509.1							0	10383	16	783	8117.36	13887.5											Cytoskeletal/contractile protein
77	38	NK357-1	ACTR-I (ALK2	Pan-specific	Activin receptor type-1	0	176	10	564	93.624	164.511	143.473	21.0383	14.6636	0	241	12	483	110.607	193.254	167.578	25.6762	15.3219	29.9856	16.8012		0	186	10	526	92.576	158.383	139.632	18.7508	13.4287	28.0924	-2.677			ALK2	X	PSTK	Protein kinase - Non-receptor protein-serine/threonine	Protein-serine/threonine kinase	TKL	STKR	Type 1
78	38	NK357-1	ACTR-I (ALK2	Pan-specific	Activin receptor type-1	0	136	10	553	69.678	122.434				0	154	10	564	81.216	141.902							0	138	10	552	70.656	120.881								ALK2	X	PSTK	Protein kinase - Non-receptor protein-serine/threonine	Protein-serine/threonine kinase	TKL	STKR	Type 1
79	39	PN003-PN004	Adducin a/g (ADD3)	S726	Adducin-alpha/gamma	0	956	14	339	319.338	561.124	328.606	232.518	70.7589	0	1088	18	300	321	560.856	482.343	78.5129	16.2774	87.0363	46.7848		0	838	12	336	277.536	474.82	436.836	37.9841	8.69528	79.4542	32.9362						Cytoskeletal/contractile protein
80	39	PN003-PN004	Adducin a/g (ADD3)	S726	Adducin-alpha/gamma	0	94	10	651	54.684	96.0878				0	706	14	334	231.128	403.83							0	708	10	334	233.132	398.852											Cytoskeletal/contractile protein
81	40	PN689	ADK	S86	Adenosine kinase	0	534	16	585	303.03	532.468	489.135	43.333	8.8591	0	517	14	532	267.596	467.548	422.651	44.8964	10.6226	19.4817	-13.5921		0	555	12	487	264.441	452.417	471.353	18.9364	4.01747	12.8766	-3.63543						Enzyme - Nucleotide metabolism
82	40	PN689	ADK	S86	Adenosine kinase	0	488	12	533	253.708	445.802				0	431	12	516	216.204	377.755							0	532	10	549	286.578	490.29											Enzyme - Nucleotide metabolism
83	41	NK129-3	Akt1 (PKBa)	Pan-specific	RAC-alpha serine/threonine-protein kinase	0	2106	12	640	1340.16	2354.86	2195.63	159.226	7.25193	0	2618	14	617	1606.67	2807.19	2351.67	455.525	19.3703	26.6222	7.1067		0	2239	10	602	1341.86	2295.71	2045.57	250.134	12.228	19.48	-6.83446			AKT1	X	PSTK	Protein kinase - Non-receptor protein-serine/threonine	Protein-serine/threonine kinase	AGC	AKT
84	41	NK129-3	Akt1 (PKBa)	Pan-specific	RAC-alpha serine/threonine-protein kinase	0	1822	14	641	1158.93	2036.41				0	1794	12	609	1085.24	1896.14							0	1807	10	584	1049.45	1795.44								AKT1	X	PSTK	Protein kinase - Non-receptor protein-serine/threonine	Protein-serine/threonine kinase	AGC	AKT
85	42	NK129-5	Akt1 (PKBa)	Pan-specific	RAC-alpha serine/threonine-protein kinase	0	7106	14	657	4659.44	8187.33	7964.3	223.029	2.80036	0	7822	16	611	4769.47	8333.28	7776.02	557.26	7.16639	9.96676	-2.36399		0	7158	16	610	4356.62	7453.49	6902.67	550.819	7.9798	10.7802	-13.3299			AKT1	X	PSTK	Protein kinase - Non-receptor protein-serine/threonine	Protein-serine/threonine kinase	AGC	AKT
86	42	NK129-5	Akt1 (PKBa)	Pan-specific	RAC-alpha serine/threonine-protein kinase	0	6629	14	666	4405.59	7741.27				0	6498	12	637	4131.58	7218.76							0	5864	8	634	3712.7	6351.85								AKT1	X	PSTK	Protein kinase - Non-receptor protein-serine/threonine	Protein-serine/threonine kinase	AGC	AKT
87	43	NK129	Akt1 (PKBa)	Pan-specific	RAC-alpha serine/threonine-protein kinase	0	681	12	528	353.232	620.681	619.064	1.61658	0.261132	0	517	10	450	228.15	398.627	441.331	42.7037	9.67612	9.93725	-28.71		0	649	16	474	300.042	513.324	509.364	3.9606	0.777558	1.03869	-17.7203			AKT1	X	PSTK	Protein kinase - Non-receptor protein-serine/threonine	Protein-serine/threonine kinase	AGC	AKT
88	43	NK129	Akt1 (PKBa)	Pan-specific	RAC-alpha serine/threonine-protein kinase	0	642	10	556	351.392	617.447				0	592	10	476	277.032	484.035							0	610	12	494	295.412	505.403								AKT1	X	PSTK	Protein kinase - Non-receptor protein-serine/threonine	Protein-serine/threonine kinase	AGC	AKT
89	44	PK515	Akt1 (PKBa)	T308	RAC-alpha serine/threonine-protein kinase	0	7784	14	694	5392.38	9475.2	8603.25	871.954	10.1352	0	8120	16	601	4870.5	8509.82	8599.37	89.5553	1.04142	11.1766	-0.0450517		0	8257	18	653	5380.07	9204.44	8260.86	943.586	11.4224	21.5576	-3.97983			AKT1	X	PSTK	Protein kinase - Non-receptor protein-serine/threonine	Protein-serine/threonine kinase	AGC	AKT
90	44	PK515	Akt1 (PKBa)	T308	RAC-alpha serine/threonine-protein kinase	0	6748	10	653	4399.91	7731.3				0	7620	16	654	4973.02	8688.93							0	6596	16	650	4277	7317.27								AKT1	X	PSTK	Protein kinase - Non-receptor protein-serine/threonine	Protein-serine/threonine kinase	AGC	AKT
91	45	PK516	Akt1 (PKBa)	Y315	RAC-alpha serine/threonine-protein kinase	0	5830	18	697	4050.96	7118.14	6959.26	158.879	2.28299	0	6460	14	603	3886.94	6791.32	6558.55	232.771	3.54912	5.83212	-5.75799		0	6636	16	725	4799.5	8211.18	7076.85	1134.33	16.0288	18.3118	1.68971			AKT1	X	PSTK	Protein kinase - Non-receptor protein-serine/threonine	Protein-serine/threonine kinase	AGC	AKT
92	45	PK516	Akt1 (PKBa)	Y315	RAC-alpha serine/threonine-protein kinase	0	5526	13	702	3870.13	6800.38				0	5282	12	687	3620.49	6325.77							0	5366	14	649	3473.45	5942.52								AKT1	X	PSTK	Protein kinase - Non-receptor protein-serine/threonine	Protein-serine/threonine kinase	AGC	AKT
93	46	PK517	Akt1 (PKBa)	Y326	RAC-alpha serine/threonine-protein kinase	0	2116	14	540	1135.08	1994.5	2182.95	188.443	8.63253	0	1288	16	479	609.288	1064.56	1376.87	312.316	22.683	31.3155	-36.9259		0	2271	14	539	1216.52	2081.28	2046.82	34.4589	1.68353	10.3161	-6.23592			AKT1	X	PSTK	Protein kinase - Non-receptor protein-serine/threonine	Protein-serine/threonine kinase	AGC	AKT
94	46	PK517	Akt1 (PKBa)	Y326	RAC-alpha serine/threonine-protein kinase	0	2288	16	594	1349.57	2371.39				0	1884	14	517	966.79	1689.19							0	2280	18	520	1176.24	2012.36								AKT1	X	PSTK	Protein kinase - Non-receptor protein-serine/threonine	Protein-serine/threonine kinase	AGC	AKT
95	47	PK071-8	Akt1 (PKBa)	T450/T451/T447	RAC-alpha serine/threonine-protein kinase	0	658	10	552	357.696	628.524	578.013	50.5109	8.73871	0	884	12	546	476.112	831.87	703.609	128.261	18.2291	26.9678	21.7288		0	898	16	478	421.596	721.284	738.122	16.8381	2.28121	11.0199	27.6998			AKT1	X	PSTK	Protein kinase - Non-receptor protein-serine/threonine	Protein-serine/threonine kinase	AGC	AKT
96	47	PK071-8	Akt1 (PKBa)	T450/T451/T447	RAC-alpha serine/threonine-protein kinase	0	550	12	558	300.204	527.503				0	612	10	547	329.294	575.347							0	798	10	560	441.28	754.96								AKT1	X	PSTK	Protein kinase - Non-receptor protein-serine/threonine	Protein-serine/threonine kinase	AGC	AKT
97	48	PK869	Akt1 (PKBa)	S473	RAC-alpha serine/threonine-protein kinase	0	4670	16	646	3006.48	5282.83	5157.4	125.43	2.43205	0	4267	18	602	2557.9	4469.2	4166.17	303.032	7.27364	9.70568	-19.2197		0	4519	20	574	2582.43	4418.12	4235.24	182.884	4.31815	6.75019	-17.8804			AKT1	X	PSTK	Protein kinase - Non-receptor protein-serine/threonine	Protein-serine/threonine kinase	AGC	AKT
98	48	PK869	Akt1 (PKBa)	S473	RAC-alpha serine/threonine-protein kinase	0	4447	14	646	2863.72	5031.97				0	3804	18	584	2211.02	3863.13							0	3882	18	613	2368.63	4052.35								AKT1	X	PSTK	Protein kinase - Non-receptor protein-serine/threonine	Protein-serine/threonine kinase	AGC	AKT
99	49	PK071-6	Akt1 (PKBa)	S473/S474/S472	RAC-alpha serine/threonine-protein kinase	0	278	12	545	144.97	254.734	254.843	0.109822	0.0430938	0	212	12	534	106.8	186.603	223.109	36.5063	16.3626	16.4056	-12.4526		0	310	12	483	143.934	246.248	226.447	19.8013	8.74433	8.78743	-11.1427			AKT1	X	PSTK	Protein kinase - Non-receptor protein-serine/threonine	Protein-serine/threonine kinase	AGC	AKT
100	49	PK071-6	Akt1 (PKBa)	S473/S474/S472	RAC-alpha serine/threonine-protein kinase	0	269	14	569	145.095	254.953				0	260	18	614	148.588	259.615							0	258	12	491	120.786	206.646								AKT1	X	PSTK	Protein kinase - Non-receptor protein-serine/threonine	Protein-serine/threonine kinase	AGC	AKT
101	50	PK071-7	Akt1 (PKBa)	S473/S474/S472	RAC-alpha serine/threonine-protein kinase	0	108	10	449	44.002	77.318	65.3114	12.0066	18.3836	0	94	10	414	34.776	60.7612	71.2916	10.5305	14.771	33.1546	9.15648		0	90	12	442	34.476	58.983	63.3353	4.35238	6.87196	25.2556	-3.02557			AKT1	X	PSTK	Protein kinase - Non-receptor protein-serine/threonine	Protein-serine/threonine kinase	AGC	AKT
102	50	PK071-7	Akt1 (PKBa)	S473/S474/S472	RAC-alpha serine/threonine-protein kinase	0	74	10	474	30.336	53.3048				0	82	12	669	46.83	81.8221							0	96	12	471	39.564	67.6877								AKT1	X	PSTK	Protein kinase - Non-receptor protein-serine/threonine	Protein-serine/threonine kinase	AGC	AKT
103	1052	PN062	AKT1S1 (PRAS40)	T246	Proline-rich AKT1 substrate 1	0	580	10	305	173.85	305.48	273.983	31.4969	11.4959	0	472	12	276	126.96	221.826	247.893	26.0667	10.5153	22.0112	-9.52248		0	477	12	389	180.885	309.466	283.663	25.8021	9.09601	20.5919	3.5332
104	1052	PN062	AKT1S1 (PRAS40)	T246	Proline-rich AKT1 substrate 1	0	470	10	300	138	242.486				0	570	12	281	156.798	273.96							0	452	10	341	150.722	257.861
105	51	NK130-8	Akt2 (PKBb)	Pan-specific	RAC-beta serine/threonine-protein kinase	0	6086	10	621	3773.2	6630.06	6576.58	53.477	0.813143	0	6340	16	629	3977.8	6950.07	6512.7	437.366	6.71559	7.52874	-0.97138		0	6761	10	761	5137.51	8789.47	8642.75	146.714	1.69754	2.51068	31.4171			AKT2	X	PSTK	Protein kinase - Non-receptor protein-serine/threonine	Protein-serine/threonine kinase	AGC	AKT
106	51	NK130-8	Akt2 (PKBb)	Pan-specific	RAC-beta serine/threonine-protein kinase	0	6072	16	613	3712.33	6523.11				0	5733	14	608	3477.15	6075.33							0	6512	12	764	4966	8496.04								AKT2	X	PSTK	Protein kinase - Non-receptor protein-serine/threonine	Protein-serine/threonine kinase	AGC	AKT
107	52	NK130-9	Akt2 (PKBb)	Pan-specific	RAC-beta serine/threonine-protein kinase	0	9844	18	692	6799.59	11947.9	12212.2	264.35	2.16464	0	10166	20	865	8776.29	15334.1	13421.5	1912.56	14.2499	16.4146	9.90218		0	9852	16	680	6688.48	11442.9	12550.7	1107.8	8.82661	10.9912	2.77181			AKT2	X	PSTK	Protein kinase - Non-receptor protein-serine/threonine	Protein-serine/threonine kinase	AGC	AKT
108	52	NK130-9	Akt2 (PKBb)	Pan-specific	RAC-beta serine/threonine-protein kinase	0	10262	16	693	7100.48	12476.6				0	9455	18	698	6587.03	11509							0	9752	16	820	7983.52	13658.5								AKT2	X	PSTK	Protein kinase - Non-receptor protein-serine/threonine	Protein-serine/threonine kinase	AGC	AKT
109	53	NK131-3	Akt3 (PKBg)	Pan-specific	RAC-gamma serine/threonine-protein kinase	0	7936	18	716	5669.29	9961.77	9332.11	629.657	6.7472	0	8192	16	661	5404.34	9442.54	8905.51	537.028	6.03028	12.7775	-4.57136		0	7642	10	641	4892.11	8369.63	7919.16	450.471	5.68838	12.4356	-15.1408			AKT3	X	PSTK	Protein kinase - Non-receptor protein-serine/threonine	Protein-serine/threonine kinase	AGC	AKT
110	53	NK131-3	Akt3 (PKBg)	Pan-specific	RAC-gamma serine/threonine-protein kinase	0	7373	14	673	4952.61	8702.46				0	7282	14	659	4789.61	8368.48							0	7008	12	624	4365.5	7468.68								AKT3	X	PSTK	Protein kinase - Non-receptor protein-serine/threonine	Protein-serine/threonine kinase	AGC	AKT
111	54	NK003-2	ALK	Pan-specific	Anaplastic lymphoma receptor-tyrosine kinase	0	2294	14	616	1404.48	2467.88	2145.55	322.323	15.0228	0	2148	12	622	1328.59	2321.34	2009.12	312.213	15.5398	30.5626	-6.35882		0	2324	10	577	1335.18	2284.28	2147.5	136.78	6.36928	21.3921	0.090568			ALK	X	PYK	Protein kinase - Receptor-tyrosine kinase	Protein-tyrosine kinase	TK	Alk
112	54	NK003-2	ALK	Pan-specific	Anaplastic lymphoma receptor-tyrosine kinase	0	1855	12	563	1037.61	1823.23				0	1736	14	564	971.208	1696.91							0	2002	10	590	1175.28	2010.72								ALK	X	PYK	Protein kinase - Receptor-tyrosine kinase	Protein-tyrosine kinase	TK	Alk
113	55	NK003-3	ALK	Pan-specific	Anaplastic lymphoma receptor-tyrosine kinase	0	3884	12	716	2772.35	4871.43	4622.21	249.223	5.39187	0	4065	16	744	3012.46	5263.41	4876.01	387.4	7.94501	13.3369	5.49094		0	4291	10	738	3159.38	5405.19	5065.99	339.2	6.69562	12.0875	9.60122			ALK	X	PYK	Protein kinase - Receptor-tyrosine kinase	Protein-tyrosine kinase	TK	Alk
114	55	NK003-3	ALK	Pan-specific	Anaplastic lymphoma receptor-tyrosine kinase	0	3600	14	694	2488.68	4372.98				0	3598	10	716	2569.01	4488.61							0	3684	10	752	2762.85	4726.79								ALK	X	PYK	Protein kinase - Receptor-tyrosine kinase	Protein-tyrosine kinase	TK	Alk
115	56	PK518	ALK	Y1092	Anaplastic lymphoma receptor-tyrosine kinase	0	7502	18	739	5530.68	9718.21	9315.41	402.796	4.32397	0	8328	16	714	5934.77	10369.3	9469.79	899.529	9.49894	13.8229	1.65718		0	8095	12	667	5391.36	9223.76	8527.88	695.886	8.16013	12.4841	-8.45412			ALK	X	PYK	Protein kinase - Receptor-tyrosine kinase	Protein-tyrosine kinase	TK	Alk
116	56	PK518	ALK	Y1092	Anaplastic lymphoma receptor-tyrosine kinase	0	7108	14	715	5072.21	8912.62				0	7240	16	679	4905.1	8570.26							0	6898	14	665	4577.86	7831.99								ALK	X	PYK	Protein kinase - Receptor-tyrosine kinase	Protein-tyrosine kinase	TK	Alk
117	57	PK519	ALK	Y1096	Anaplastic lymphoma receptor-tyrosine kinase	0	7216	18	695	5002.61	8790.32	8365.01	425.307	5.08435	0	7819	18	732	5710.33	9977.18	9012.91	964.264	10.6987	15.783	7.74537		0	7862	20	739	5795.24	9914.73	9083.51	831.224	9.15092	14.2353	8.58929			ALK	X	PYK	Protein kinase - Receptor-tyrosine kinase	Protein-tyrosine kinase	TK	Alk
118	57	PK519	ALK	Y1096	Anaplastic lymphoma receptor-tyrosine kinase	0	6730	16	673	4518.52	7939.71				0	6871	16	672	4606.56	8048.65							0	6736	18	718	4823.52	8252.28								ALK	X	PYK	Protein kinase - Receptor-tyrosine kinase	Protein-tyrosine kinase	TK	Alk
119	58	PK520	ALK	Y1507	Anaplastic lymphoma receptor-tyrosine kinase	0	11736	18	731	8565.86	15051.5	14935.3	116.172	0.777835	0	12350	20	678	8359.74	14606.3	14291	315.268	2.20606	2.98389	-4.31395		0	12963	20	758	9810.79	16784.7	14699.7	2084.96	14.1837	14.9615	-1.57713			ALK	X	PYK	Protein kinase - Receptor-tyrosine kinase	Protein-tyrosine kinase	TK	Alk
120	58	PK520	ALK	Y1507	Anaplastic lymphoma receptor-tyrosine kinase	0	11306	16	747	8433.63	14819.1				0	12232	20	655	7998.86	13975.7							0	11258	18	656	7373.44	12614.8								ALK	X	PYK	Protein kinase - Receptor-tyrosine kinase	Protein-tyrosine kinase	TK	Alk
121	59	PN738	ALOX5 (5-LO)	S272	Arachidonate 5-lipoxygenase	0	8444	18	625	5266.25	9253.57	10467	1213.39	11.5926	0	10076	16	653	6569.18	11477.8	12273.9	796.168	6.48666	18.0792	17.2636		0	10723	18	618	6615.69	11318.4	10647	671.432	6.30632	17.8989	1.7197
122	59	PN738	ALOX5 (5-LO)	S272	Arachidonate 5-lipoxygenase	0	10012	16	665	6647.34	11680.4				0	11333	16	661	7480.54	13070.1							0	9072	18	644	5830.78	9975.53
123	60	PN568	AML1 (RUNX1)	T273	Runt-related transcription factor 1	0	7252	16	799	5781.56	10159.1	10030.8	128.282	1.27889	0	8838	17	799	7047.98	12314.3	10988.2	1326.1	12.0684	13.3473	9.54518		0	8396	18	725	6074.05	10391.7	9795.76	595.972	6.08397	7.36286	-2.34289						Transcription protein					X
124	60	PN568	AML1 (RUNX1)	T273	Runt-related transcription factor 1	0	7006	14	806	5635.55	9902.49				0	7579	14	731	5530.02	9662.13							0	6538	20	825	5377.35	9199.79											Transcription protein					X
125	61	PN569	AML2 (RUNX3)	T231	Runt-related transcription factor 3	0	6276	12	829	5192.86	9124.61	8656.81	467.798	5.40382	0	7338	24	885	6472.89	11309.5	10000.9	1308.66	13.0855	18.4893	15.526		0	7242	16	766	5535.12	9469.71	9148.62	321.083	3.50963	8.91345	5.68119						Transcription protein					X
126	61	PN569	AML2 (RUNX3)	T231	Runt-related transcription factor 3	0	6124	16	763	4660.4	8189.01				0	6612	14	754	4974.89	8692.21							0	6349	18	815	5159.77	8827.54											Transcription protein					X
127	62	NK259-1	AMPKa1 (PRKAA1)	Pan-specific	5'-AMP-activated protein kinase catalytic subunit alpha-1	0	3500	12	636	2218.37	3898	3632.65	265.347	7.30449	0	3178	16	546	1726.45	3016.48	3047.12	30.6322	1.00528	8.30978	-16.1187		0	3777	16	594	2234.03	3822.08	3808.07	14.0067	0.367815	7.67231	4.82897			AMPKa1	X	PSTK	Protein kinase - Non-receptor protein-serine/threonine	Protein-serine/threonine kinase	CAMK	CAMKL	AMPK
128	62	NK259-1	AMPKa1 (PRKAA1)	Pan-specific	5'-AMP-activated protein kinase catalytic subunit alpha-1	0	3086	10	623	1916.35	3367.3				0	3020	14	586	1761.52	3077.75							0	3224	10	690	2217.66	3794.06								AMPKa1	X	PSTK	Protein kinase - Non-receptor protein-serine/threonine	Protein-serine/threonine kinase	CAMK	CAMKL	AMPK
129	63	NK259-2	AMPKa1 (PRKAA1)	Pan-specific	5'-AMP-activated protein kinase catalytic subunit alpha-1	0	2568	12	638	1630.73	2865.43	2812.78	52.6511	1.87186	0	2544	18	631	1593.91	2784.9	2672.46	112.439	4.20731	6.07916	-4.98864		0	2700	16	628	1685.55	2883.71	2999.48	115.764	3.85948	5.73133	6.63752			AMPKa1	X	PSTK	Protein kinase - Non-receptor protein-serine/threonine	Protein-serine/threonine kinase	CAMK	CAMKL	AMPK
130	63	NK259-2	AMPKa1 (PRKAA1)	Pan-specific	5'-AMP-activated protein kinase catalytic subunit alpha-1	0	2320	10	680	1570.8	2760.13				0	2214	14	666	1465.2	2560.02							0	2318	16	791	1820.88	3115.24								AMPKa1	X	PSTK	Protein kinase - Non-receptor protein-serine/threonine	Protein-serine/threonine kinase	CAMK	CAMKL	AMPK
131	64	PK521	AMPKa1 (PRKAA1)	T183+S184	5'-AMP-activated protein kinase catalytic subunit alpha-1	0	15052	18	727	10929.7	19205.1	18713.1	491.997	2.62915	0	15954	13	792	12625.3	22059.1	21654	405.067	1.87064	4.49979	15.7156		0	15741	18	730	11477.8	19636.7	20070.8	434.088	2.16279	4.79194	7.25503			AMPKa1	X	PSTK	Protein kinase - Non-receptor protein-serine/threonine	Protein-serine/threonine kinase	CAMK	CAMKL	AMPK
132	64	PK521	AMPKa1 (PRKAA1)	T183+S184	5'-AMP-activated protein kinase catalytic subunit alpha-1	0	10941	14	949	10369.7	18221.1				0	15214	12	800	12161.6	21248.9							0	14760	18	813	11985.2	20504.9								AMPKa1	X	PSTK	Protein kinase - Non-receptor protein-serine/threonine	Protein-serine/threonine kinase	CAMK	CAMKL	AMPK
133	65	NK260-2	AMPKa2 (PRKAA2)	Pan-specific	5'-AMP-activated protein kinase catalytic subunit alpha-2	0	5940	18	711	4210.54	7398.54	7574.69	176.145	2.32545	0	5726	20	708	4039.85	7058.48	6985.34	73.1393	1.04704	3.37248	-7.78041		0	6166	12	702	4320.11	7391.02	7953.45	562.432	7.07155	9.39699	5.00042			AMPKa2	X	PSTK	Protein kinase - Non-receptor protein-serine/threonine	Protein-serine/threonine kinase	CAMK	CAMKL	AMPK
134	65	NK260-2	AMPKa2 (PRKAA2)	Pan-specific	5'-AMP-activated protein kinase catalytic subunit alpha-2	0	6040	14	732	4411.03	7750.83				0	5507	20	721	3956.13	6912.21							0	6116	16	816	4977.6	8515.88								AMPKa2	X	PSTK	Protein kinase - Non-receptor protein-serine/threonine	Protein-serine/threonine kinase	CAMK	CAMKL	AMPK
135	66	NK260-1	AMPKa2 (PRKAA2)	Pan-specific	5'-AMP-activated protein kinase catalytic subunit alpha-2	0	9912	16	662	6551.15	11511.3	11289.2	222.174	1.96803	0	11074	14	640	7078.4	12367.5	12504.5	136.973	1.09539	3.06342	10.7652		0	8419	12	670	5632.69	9636.64	8086.23	1550.41	19.1735	21.1415	-28.3718			AMPKa2	X	PSTK	Protein kinase - Non-receptor protein-serine/threonine	Protein-serine/threonine kinase	CAMK	CAMKL	AMPK
136	66	NK260-1	AMPKa2 (PRKAA2)	Pan-specific	5'-AMP-activated protein kinase catalytic subunit alpha-2	0	9224	16	684	6298.27	11067				0	11444	14	633	7235.19	12641.4							0	6142	10	623	3820.24	6535.82								AMPKa2	X	PSTK	Protein kinase - Non-receptor protein-serine/threonine	Protein-serine/threonine kinase	CAMK	CAMKL	AMPK
137	67	PK522	AMPKa2 (PRKAA2)	S377	5'-AMP-activated protein kinase catalytic subunit alpha-2	0	6497	14	765	4959.49	8714.56	8567.09	147.474	1.7214	0	6721	12	691	4635.92	8099.95	7718.43	381.521	4.94299	6.66439	-9.90606		0	6930	12	684	4731.91	8095.55	7636	459.549	6.01819	7.73959	-10.8682			AMPKa2	X	PSTK	Protein kinase - Non-receptor protein-serine/threonine	Protein-serine/threonine kinase	CAMK	CAMKL	AMPK
138	67	PK522	AMPKa2 (PRKAA2)	S377	5'-AMP-activated protein kinase catalytic subunit alpha-2	0	6245	14	769	4791.64	8419.61				0	5808	16	725	4199.2	7336.91							0	6206	10	677	4194.69	7176.45								AMPKa2	X	PSTK	Protein kinase - Non-receptor protein-serine/threonine	Protein-serine/threonine kinase	CAMK	CAMKL	AMPK
139	68	PK523	ANKRD3 (RIPK4, DIK)	S438	Ankyrin repeat domain protein-serine kinase 3	0	6818	14	705	4796.82	8428.72	8258.68	170.042	2.05895	0	6782	14	679	4595.47	8029.28	7475.76	553.515	7.40413	9.46308	-9.47988		0	7424	12	792	5870.3	10043.2	9204.8	838.358	9.10784	11.1668	11.4561			ANKRD3	X	PSTK	Protein kinase - Non-receptor protein-serine/threonine	Protein-serine/threonine kinase	TKL	RIPK
140	68	PK523	ANKRD3 (RIPK4, DIK)	S438	Ankyrin repeat domain protein-serine kinase 3	0	6521	10	707	4603.28	8088.63				0	6353	14	625	3961.88	6922.25							0	6324	14	775	4890.25	8366.44								ANKRD3	X	PSTK	Protein kinase - Non-receptor protein-serine/threonine	Protein-serine/threonine kinase	TKL	RIPK
141	69	PN503	ANXA1	Y207	Annexin A1	0	4732	14	687	3241.27	5695.38	5554.35	141.034	2.53916	0	4822	12	628	3020.68	5277.78	5046.41	231.366	4.58477	7.12393	-9.14482		0	5067	12	616	3113.88	5327.35	4846.92	480.438	9.91225	12.4514	-12.7365
142	69	PN503	ANXA1	Y207	Annexin A1	0	4434	14	697	3080.74	5413.31				0	4322	16	640	2755.84	4815.05							0	4200	16	610	2552.24	4366.48
143	70	PN504	ANXA2	Y238	Annexin A2	0	5382	14	627	3365.74	5914.09	5625.3	288.793	5.13383	0	6076	18	712	4313.3	7536.26	6676.25	860.007	12.8816	18.0154	18.6826		0	6546	14	708	4624.66	7912.05	7736.21	175.845	2.27302	7.40685	37.5253
144	70	PN504	ANXA2	Y238	Annexin A2	0	3219	12	947	3037.03	5336.51				0	5420	16	616	3328.86	5816.24							0	6311	16	702	4419.09	7560.36
145	71	PN739	APC	S2129	Adenomatous polyposis coli protein	0	8813	14	674	5930.53	10420.8	11312	891.158	7.87801	0	9029	14	724	6526.86	11403.8	11429.7	25.8518	0.226181	8.1042	1.04064		0	10896	18	731	7951.82	13604.3	11453.3	2151	18.7806	26.6586	1.24942
146	71	PN739	APC	S2129	Adenomatous polyposis coli protein	0	10366	16	671	6944.85	12203.1				0	10540	16	623	6556.45	11455.5							0	9046	14	602	5437.26	9302.3
147	72	PN570	AR	S96	Androgen receptor	0	14214	18	715	10150.1	17835.3	17929.8	94.5081	0.527101	0	15992	16	708	11311	19762.8	19531	231.723	1.18643	1.71353	8.93065		0	14166	18	678	9592.34	16411	14737.5	1673.51	11.3555	11.8826	-17.8046						Receptor (steroid), Transcription protein					X
148	72	PN570	AR	S96	Androgen receptor	0	13288	18	773	10257.7	18024.3				0	15708	18	704	11045.8	19299.3							0	11396	16	671	7635.98	13064											Receptor (steroid), Transcription protein					X
149	73	PN571	AR	S310	Androgen receptor	0	5969	18	814	4844.11	8511.82	8219.57	292.25	3.55554	0	6398	20	757	4828.15	8435.81	7936.74	499.073	6.28814	9.84368	-3.44096		0	6403	16	821	5243.73	8971.19	8417.12	554.064	6.58258	10.1381	2.40344						Receptor (steroid), Transcription protein					X
150	73	PN571	AR	S310	Androgen receptor	0	5570	14	812	4511.47	7927.32				0	5978	16	714	4256.87	7437.66							0	5354	16	861	4596.02	7863.06											Receptor (steroid), Transcription protein					X
151	74	PN203	AR	S310	Androgen receptor	0	170	14	491	76.596	134.59	124.035	10.5552	8.50982	0	179	12	457	76.319	133.346	117.552	15.794	13.4357	21.9456	-5.22713		0	172	12	534	85.44	146.174	158.092	11.9177	7.53847	16.0483	27.4573						Receptor (steroid), Transcription protein					X
152	74	PN203	AR	S310	Androgen receptor	0	110	12	659	64.582	113.48				0	142	12	448	58.24	101.758							0	196	14	546	99.372	170.01											Receptor (steroid), Transcription protein					X
153	75	PN740	ARID1A	S363	AT-rich interactive domain-containing protein 1A	0	16854	14	669	11266	19795.9	20131.2	335.288	1.66551	0	17982	18	685	12305.3	21500.1	11444.8	10055.3	87.8587	89.5242	-43.149		0	17822	18	771	13726.9	23484.5	22823.4	661.144	2.89679	4.5623	13.373						Nuclear receptor co-regulator; DNA binding protein					X
154	75	PN740	ARID1A	S363	AT-rich interactive domain-containing protein 1A	0	16512	14	706	11647.6	20466.5				0	794	12	1017	795.294	1389.55							0	16150	18	803	12954	22162.2											Nuclear receptor co-regulator; DNA binding protein					X
155	77	NN121	Arrestin b	Pan-specific	Arrestin beta 1	0	441	8	333	144.189	253.361	221.581	31.7806	14.3427	0	1282	10	291	370.152	646.735	422.04	224.695	53.2403	67.583	90.4678		0	484	10	312	147.888	253.013	222.464	30.5488	13.732	28.0747	0.398732
156	77	NN121	Arrestin b	Pan-specific	Arrestin beta 1	0	356	12	314	108.016	189.8				0	386	12	302	112.948	197.344							0	350	8	328	112.176	191.915
157	78	PN133	Arrestin b	S412	Arrestin beta 1	0	531	14	523	270.391	475.117	466.866	8.25068	1.76725	0	474	16	443	202.894	354.499	469.87	115.37	24.5537	26.3209	0.643398		0	626	18	694	421.952	721.893	698.762	23.1306	3.31022	5.07747	49.6709
158	78	PN133	Arrestin b	S412	Arrestin beta 1	0	512	12	522	261	458.615				0	636	18	542	334.956	585.24							0	592	18	688	394.912	675.632
159	79	NK007-3	ASK1 (MAP3K5)	Pan-specific	Apoptosis signal regulating protein-serine kinase 1	0	148	12	452	61.472	108.015	98.597	9.41831	9.55232	0	106	8	409	40.082	70.0319	58.184	11.8479	20.3628	29.9151	-40.9881		0	106	8	370	36.26	62.0351	72.0367	10.0016	13.884	23.4363	-26.9383			ASK1	X	PSTK	Protein kinase - Non-receptor protein-serine/threonine	Protein-serine/threonine kinase	STE	STE11
160	79	NK007-3	ASK1 (MAP3K5)	Pan-specific	Apoptosis signal regulating protein-serine kinase 1	0	112	8	488	50.752	89.1787				0	46	6	663	26.52	46.3361							0	116	8	444	47.952	82.0383								ASK1	X	PSTK	Protein kinase - Non-receptor protein-serine/threonine	Protein-serine/threonine kinase	STE	STE11
161	80	NK007-2	ASK1 (MAP3K5)	Pan-specific	Apoptosis signal regulating protein-serine kinase 1	0	1864	16	694	1282.51	2253.56	2217.63	35.9337	1.62036	0	1598	10	625	992.5	1734.11	1763.45	29.3357	1.66355	3.28391	-20.4805		0	1934	10	633	1217.89	2083.62	2058.29	25.3307	1.23067	2.85103	-7.18511			ASK1	X	PSTK	Protein kinase - Non-receptor protein-serine/threonine	Protein-serine/threonine kinase	STE	STE11
162	80	NK007-2	ASK1 (MAP3K5)	Pan-specific	Apoptosis signal regulating protein-serine kinase 1	0	1936	14	646	1241.61	2181.69				0	1770	10	583	1026.08	1792.78							0	1968	20	610	1188.28	2032.96								ASK1	X	PSTK	Protein kinase - Non-receptor protein-serine/threonine	Protein-serine/threonine kinase	STE	STE11
163	81	PK175	ASK1 (MAP3K5)	S83	Apoptosis signal regulating protein-serine kinase 1	0	198	10	505	94.94	166.824	160.417	6.40656	3.99369	0	168	10	454	71.732	125.331	118.148	7.1828	6.07947	10.0732	-26.3492		0	180	10	445	75.65	129.425	134.304	4.87932	3.63303	7.62672	-16.2779			ASK1	X	PSTK	Protein kinase - Non-receptor protein-serine/threonine	Protein-serine/threonine kinase	STE	STE11
164	81	PK175	ASK1 (MAP3K5)	S83	Apoptosis signal regulating protein-serine kinase 1	0	186	10	498	87.648	154.01				0	156	10	435	63.51	110.966							0	192	10	447	81.354	139.184								ASK1	X	PSTK	Protein kinase - Non-receptor protein-serine/threonine	Protein-serine/threonine kinase	STE	STE11
165	82	PK525	ASK1 (MAP3K5)	T838	Apoptosis signal regulating protein-serine kinase 1	0	9222	14	776	7145.41	12555.5	12136.2	419.297	3.45492	0	8877	16	696	6167.26	10775.5	11197.1	421.533	3.76468	7.2196	-7.73863		0	9356	12	702	6559.49	11222.2	11469.5	247.244	2.15567	5.61059	-5.49385			ASK1	X	PSTK	Protein kinase - Non-receptor protein-serine/threonine	Protein-serine/threonine kinase	STE	STE11
166	82	PK525	ASK1 (MAP3K5)	T838	Apoptosis signal regulating protein-serine kinase 1	0	8850	18	755	6668.16	11716.9				0	9086	14	733	6649.78	11618.6							0	8700	20	789	6848.52	11716.7								ASK1	X	PSTK	Protein kinase - Non-receptor protein-serine/threonine	Protein-serine/threonine kinase	STE	STE11
167	83	PK143	ASK1 (MAP3K5)	S966	Apoptosis signal regulating protein-serine kinase 1	0	804	12	283	224.136	393.84	355.587	38.2531	10.7577	0	1440	14	299	426.374	744.967	561.894	183.073	32.5815	43.3392	58.0188		0	798	10	250	197	337.036	283.23	53.806	18.9973	29.755	-20.3486			ASK1	X	PSTK	Protein kinase - Non-receptor protein-serine/threonine	Protein-serine/threonine kinase	STE	STE11
168	83	PK143	ASK1 (MAP3K5)	S966	Apoptosis signal regulating protein-serine kinase 1	0	610	12	302	180.596	317.334				0	816	10	269	216.814	378.821							0	464	14	298	134.1	229.424								ASK1	X	PSTK	Protein kinase - Non-receptor protein-serine/threonine	Protein-serine/threonine kinase	STE	STE11
169	84	PK524	ASK1 (MAP3K5)	S1033	Apoptosis signal regulating protein-serine kinase 1	0	7614	16	780	5926.44	10413.6	10175.8	237.832	2.33723	0	7741	20	680	5250.28	9173.37	9313.73	140.363	1.50706	3.84429	-8.47169		0	8086	18	725	5849.3	10007.2	9813.66	193.565	1.9724	4.30963	-3.55878			ASK1	X	PSTK	Protein kinase - Non-receptor protein-serine/threonine	Protein-serine/threonine kinase	STE	STE11
170	84	PK524	ASK1 (MAP3K5)	S1033	Apoptosis signal regulating protein-serine kinase 1	0	7692	18	737	5655.74	9937.96				0	7989	20	679	5410.95	9454.1							0	7244	35	780	5623.02	9620.1								ASK1	X	PSTK	Protein kinase - Non-receptor protein-serine/threonine	Protein-serine/threonine kinase	STE	STE11
171	85	PN741	ASS1	T174+S180	Argininosuccinate synthase	0	5208	18	688	3570.72	6274.28	6807.76	533.48	7.83636	0	6718	18	586	3926.2	6859.92	7427.25	567.338	7.6386	15.475	9.09983		0	7030	16	634	4446.88	7607.9	7740.65	132.752	1.715	9.55135	13.7034
172	85	PN741	ASS1	T174+S180	Argininosuccinate synthase	0	6142	16	682	4177.93	7341.24				0	6872	12	667	4575.62	7994.59							0	6587	22	701	4602.06	7873.4
173	86	PN742	ATASE (PPAT)	T356	Glutamine PRPP amidotransferase	0	10968	20	763	8353.32	14678	15187.1	509.102	3.35219	0	13030	16	673	8758.42	15302.8	15532.5	229.647	1.47849	4.83069	2.27413		0	12334	16	827	10187	17428.3	16773.4	654.898	3.90438	7.25657	10.445						De novo purine synthesis
174	86	PN742	ATASE (PPAT)	T356	Glutamine PRPP amidotransferase	0	11572	16	773	8932.79	15696.2				0	12922	16	699	9021.29	15762.1							0	11102	18	850	9421.4	16118.5											De novo purine synthesis
175	87	NN160-2	ATF2 (CRE-BP1)	Pan-specific	Cyclic AMP-dependent transcription factor ATF-2	0	140	13	494	62.738	110.24	112.143	1.90299	1.69693	0	122	12	489	53.79	93.9827	98.0293	4.04655	4.1279	5.82483	-12.5854		0	170	10	503	80.48	137.689	125.408	12.2804	9.79237	11.4893	11.8289						Transcription protein					X
176	87	NN160-2	ATF2 (CRE-BP1)	Pan-specific	Cyclic AMP-dependent transcription factor ATF-2	0	134	12	532	64.904	114.046				0	119	12	546	58.422	102.076							0	134	12	542	66.124	113.128											Transcription protein					X
177	88	PN572	ATF2 (CRE-BP1)	T69+T71	Cyclic AMP-dependent transcription factor ATF-2	0	9126	14	755	6879.56	12088.4	11696.6	391.798	3.34968	0	10044	16	750	7521	13140.8	12653.8	487.007	3.8487	7.19837	8.18357		0	10171	20	816	8283.22	14171.3	12932.5	1238.79	9.57887	12.9285	10.5662						Transcription protein					X
178	88	PN572	ATF2 (CRE-BP1)	T69+T71	Cyclic AMP-dependent transcription factor ATF-2	0	8962	14	719	6433.61	11304.8				0	9812	18	711	6963.53	12166.8							0	8708	12	786	6835.06	11693.7											Transcription protein					X
179	89	PN204	ATF2 (CRE-BP1)	T71	Cyclic AMP-dependent transcription factor ATF-2	0	304	14	548	158.92	279.246	263.502	15.744	5.97493	0	292	12	507	141.96	248.035	246.584	1.45019	0.58811	6.56304	-6.42018		0	332	14	548	174.264	298.138	292.42	5.71763	1.95528	7.9302	10.9748						Transcription protein					X
180	89	PN204	ATF2 (CRE-BP1)	T71	Cyclic AMP-dependent transcription factor ATF-2	0	260	10	564	141	247.758				0	242	12	610	140.3	245.134							0	304	10	570	167.58	286.703											Transcription protein					X
181	90	PN115	ATF2 (CRE-BP1)	S112	Cyclic AMP-dependent transcription factor ATF-2	0	198	12	258	47.988	84.322	67.007	17.3149	25.8405	0	410	10	205	82	143.272	105.616	37.656	35.6538	61.4942	57.6188		0	150	10	228	31.92	54.6101	45.6316	8.9785	19.6761	45.5165	-31.9003						Transcription protein					X
182	90	PN115	ATF2 (CRE-BP1)	S112	Cyclic AMP-dependent transcription factor ATF-2	0	80	10	404	28.28	49.6921				0	186	10	221	38.896	67.9597							0	58	6	412	21.424	36.6531											Transcription protein					X
183	91	NK230-2	ATM	Pan-specific	Ataxia telangiectasia mutated protein-serine kinase	0	9002	16	776	6973.14	12252.8	12492.2	239.422	1.91656	0	8842	16	752	6637.15	11596.5	12256	659.493	5.38097	7.29754	-1.89094		0	8878	18	797	7061.42	12081	11602.9	478.021	4.11982	6.03639	-7.1188			ATM	X	PSTK	Protein kinase - Atypical protein-serine kinase	Protein-serine/threonine kinase	Atypical	PIKK	ATM
184	91	NK230-2	ATM	Pan-specific	Ataxia telangiectasia mutated protein-serine kinase	0	9030	18	804	7245.65	12731.7				0	9146	20	810	7392.06	12915.5							0	8340	14	781	6502.61	11124.9								ATM	X	PSTK	Protein kinase - Atypical protein-serine kinase	Protein-serine/threonine kinase	Atypical	PIKK	ATM
185	92	NK230-1	ATM	Pan-specific	Ataxia telangiectasia mutated protein-serine kinase	0	8856	16	752	6647.68	11681	11917.1	236.134	1.98148	0	9566	16	719	6866.45	11997.2	11722	275.209	2.34781	4.32928	-1.63738		0	9186	12	708	6495.19	11112.2	9443.75	1668.49	17.6677	19.6491	-20.7545			ATM	X	PSTK	Protein kinase - Atypical protein-serine kinase	Protein-serine/threonine kinase	Atypical	PIKK	ATM
186	92	NK230-1	ATM	Pan-specific	Ataxia telangiectasia mutated protein-serine kinase	0	8767	12	790	6916.45	12153.2				0	9320	14	704	6551.42	11446.7							0	6729	16	677	4544.7	7775.26								ATM	X	PSTK	Protein kinase - Atypical protein-serine kinase	Protein-serine/threonine kinase	Atypical	PIKK	ATM
187	93	PK526	ATM	S1981	Ataxia telangiectasia mutated protein-serine kinase	0	4309	14	752	3229.84	5675.3	5627.28	48.0272	0.853472	0	5038	12	734	3689.08	6445.62	5907.49	538.135	9.10938	9.96285	4.97953		0	4662	14	777	3611.5	6178.7	5975.43	203.271	3.40178	4.25526	6.18682			ATM	X	PSTK	Protein kinase - Atypical protein-serine kinase	Protein-serine/threonine kinase	Atypical	PIKK	ATM
188	93	PK526	ATM	S1981	Ataxia telangiectasia mutated protein-serine kinase	0	4113	16	775	3175.18	5579.25				0	4520	14	682	3073.09	5369.35							0	4301	14	787	3373.87	5772.15								ATM	X	PSTK	Protein kinase - Atypical protein-serine kinase	Protein-serine/threonine kinase	Atypical	PIKK	ATM
189	94	PK527	ATM	Y2969	Ataxia telangiectasia mutated protein-serine kinase	0	4542	18	927	4193.75	7369.03	6517.04	851.995	13.0733	0	4764	18	929	4409.03	7703.53	6588.56	1114.97	16.9228	29.9962	1.09748		0	4482	18	808	3606.91	6170.85	5582.42	588.43	10.5408	23.6141	-14.3411			ATM	X	PSTK	Protein kinase - Atypical protein-serine kinase	Protein-serine/threonine kinase	Atypical	PIKK	ATM
190	94	PK527	ATM	Y2969	Ataxia telangiectasia mutated protein-serine kinase	0	4176	16	775	3224	5665.04				0	4193	16	750	3132.75	5473.59							0	3950	16	742	2919.03	4993.99								ATM	X	PSTK	Protein kinase - Atypical protein-serine kinase	Protein-serine/threonine kinase	Atypical	PIKK	ATM
191	95	NK237-1	ATR	Pan-specific	Ataxia telangiectasia and Rad3 related protein-serine kinase	0	2048	12	603	1227.71	2157.26	2263.51	106.251	4.69408	0	1790	14	657	1166.83	2038.71	2097.71	59.0069	2.81292	7.507	-7.32494		0	2308	10	562	1291.48	2209.51	2362.62	153.111	6.48055	11.1746	4.37846			ATR	X	PSTK	Protein kinase - Atypical protein-serine kinase	Protein-serine/threonine kinase	Atypical	PIKK	ATR
192	95	NK237-1	ATR	Pan-specific	Ataxia telangiectasia and Rad3 related protein-serine kinase	0	2258	14	601	1348.64	2369.77				0	2172	14	572	1234.38	2156.72							0	2405	14	615	1470.46	2515.73								ATR	X	PSTK	Protein kinase - Atypical protein-serine kinase	Protein-serine/threonine kinase	Atypical	PIKK	ATR
193	96	NK237-3	ATR	Pan-specific	Ataxia telangiectasia and Rad3 related protein-serine kinase	0	10668	14	868	9247.67	16249.5	16069.5	180.02	1.12026	0	9658	22	858	8267.69	14445.4	14716.9	271.475	1.84465	2.96491	-8.41715		0	11486	20	866	9929.56	16987.9	16012.7	975.149	6.08983	7.21009	-0.353165			ATR	X	PSTK	Protein kinase - Atypical protein-serine kinase	Protein-serine/threonine kinase	Atypical	PIKK	ATR
194	96	NK237-3	ATR	Pan-specific	Ataxia telangiectasia and Rad3 related protein-serine kinase	0	10462	20	866	9042.77	15889.5				0	10170	18	845	8578.44	14988.4							0	9512	20	926	8789.59	15037.6								ATR	X	PSTK	Protein kinase - Atypical protein-serine kinase	Protein-serine/threonine kinase	Atypical	PIKK	ATR
195	97	PK528	ATR	S435+S436	Ataxia telangiectasia and Rad3 related protein-serine kinase	0	6944	22	837	5793.71	10180.4	10176.5	3.86397	0.0379693	0	7400	38	887	6530.09	11409.5	10930.9	478.557	4.37801	4.41598	7.41293		0	7506	24	823	6157.69	10534.8	10030.8	504.004	5.02455	5.06252	-1.43194			ATR	X	PSTK	Protein kinase - Atypical protein-serine kinase	Protein-serine/threonine kinase	Atypical	PIKK	ATR
196	97	PK528	ATR	S435+S436	Ataxia telangiectasia and Rad3 related protein-serine kinase	0	6566	17	884	5789.32	10172.7				0	7245	20	828	5982.3	10452.4							0	6236	35	898	5568.5	9526.82								ATR	X	PSTK	Protein kinase - Atypical protein-serine kinase	Protein-serine/threonine kinase	Atypical	PIKK	ATR
197	98	NK008-3	AurKA (Aurora A, AIK, STK15)	Pan-specific	Aurora Kinase A (serine/threonine protein kinase 6)	0	4492	16	736	3294.34	5788.63	5783.91	4.72145	0.0816308	0	4430	22	797	3513.18	6138.27	5701.05	437.228	7.66927	7.7509	-1.43268		0	4652	14	697	3232.69	5530.61	5415.7	114.916	2.1219	2.20353	-6.36616			AurA	X	PSTK	Protein kinase - Non-receptor protein-serine/threonine	Protein-serine/threonine kinase	Other	AUR
198	98	NK008-3	AurKA (Aurora A, AIK, STK15)	Pan-specific	Aurora Kinase A (serine/threonine protein kinase 6)	0	4351	12	758	3288.96	5779.19				0	4328	18	699	3012.69	5263.82							0	4222	18	737	3098.35	5300.78								AurA	X	PSTK	Protein kinase - Non-receptor protein-serine/threonine	Protein-serine/threonine kinase	Other	AUR
199	99	NK008-4	AurKA (Aurora A, AIK, STK15)	Pan-specific	Aurora Kinase A (serine/threonine protein kinase 6)	0	6806	16	778	5282.62	9282.34	8810.27	472.065	5.35811	0	6802	16	768	5211.65	9105.87	9293.99	188.124	2.02415	7.38226	5.49041		0	7053	12	740	5210.34	8914.07	8752.29	161.777	1.8484	7.20651	-0.65817			AurA	X	PSTK	Protein kinase - Non-receptor protein-serine/threonine	Protein-serine/threonine kinase	Other	AUR
200	99	NK008-4	AurKA (Aurora A, AIK, STK15)	Pan-specific	Aurora Kinase A (serine/threonine protein kinase 6)	0	6360	16	748	4745.31	8338.21				0	6854	19	794	5426.99	9482.12							0	6334	18	795	5021.22	8590.51								AurA	X	PSTK	Protein kinase - Non-receptor protein-serine/threonine	Protein-serine/threonine kinase	Other	AUR
201	100	PK529	AurKA (Aurora A, AIK, STK15)	T287+T288	Aurora Kinase A (serine/threonine protein kinase 6)	0	10450	16	758	7908.97	13897.2	14208.7	311.468	2.1921	0	12753	20	786	10008.1	17486.4	15984.5	1501.83	9.39552	11.5876	12.4983		0	11135	18	740	8226.58	14074.4	15156.7	1082.38	7.14121	9.33331	6.67236			AurA	X	PSTK	Protein kinase - Non-receptor protein-serine/threonine	Protein-serine/threonine kinase	Other	AUR
202	100	PK529	AurKA (Aurora A, AIK, STK15)	T287+T288	Aurora Kinase A (serine/threonine protein kinase 6)	0	10718	14	772	8263.49	14520.2				0	12066	18	688	8289.02	14482.7							0	10796	22	881	9491.89	16239.1								AurA	X	PSTK	Protein kinase - Non-receptor protein-serine/threonine	Protein-serine/threonine kinase	Other	AUR
203	76	PK174	AurKA (Aurora A, AIK, STK15)	T288	Aurora Kinase A (serine/threonine protein kinase 6)	0	166	14	520	79.04	138.885	136.609	2.27551	1.6657	0	180	11	545	92.105	160.927	132.368	28.5591	21.5755	23.2412	-3.10465		0	190	10	636	114.48	195.857	170.345	25.5121	14.9767	16.6424	24.695				X	PSTK
204	76	PK174	AurKA (Aurora A, AIK, STK15)	T288	Aurora Kinase A (serine/threonine protein kinase 6)	0	149	10	550	76.45	134.334				0	130	8	487	59.414	103.809							0	160	12	572	84.656	144.833									X	PSTK
205	101	NK193-2	AurKB (Aurora B, AIM-1)	Pan-specific	Aurora Kinase B (serine/threonine protein kinase 12)	0	6338	16	748	4728.86	8309.29	7877.13	432.167	5.48635	0	6557	20	686	4484.38	7835.18	7740.04	95.1446	1.22925	6.7156	-1.74038		0	6694	18	707	4719.93	8075.06	7311	764.055	10.4508	15.9371	-7.18698			AurB	X	PSTK	Protein kinase - Non-receptor protein-serine/threonine	Protein-serine/threonine kinase	Other	AUR
206	101	NK193-2	AurKB (Aurora B, AIM-1)	Pan-specific	Aurora Kinase B (serine/threonine protein kinase 12)	0	5828	8	728	4236.96	7444.96				0	6240	16	703	4375.47	7644.89							0	5558	12	690	3826.74	6546.95								AurB	X	PSTK	Protein kinase - Non-receptor protein-serine/threonine	Protein-serine/threonine kinase	Other	AUR
207	102	NK193-3	AurKB (Aurora B, AIM-1)	Pan-specific	Aurora Kinase B (serine/threonine protein kinase 12)	0	7739	16	644	4973.61	8739.37	5331.2	3408.17	63.9287	0	7882	16	672	5285.95	9235.7	9845.59	609.894	6.19459	70.1233	84.6787	Possible	0	7906	18	660	5206.08	8906.78	8479.39	427.385	5.04028	68.969	59.0522			AurB	X	PSTK	Protein kinase - Non-receptor protein-serine/threonine	Protein-serine/threonine kinase	Other	AUR
208	102	NK193-3	AurKB (Aurora B, AIM-1)	Pan-specific	Aurora Kinase B (serine/threonine protein kinase 12)	0	1078	4	1019	1094.41	1923.03				0	7919	14	757	5984.09	10455.5							0	7145	14	660	4706.46	8052.01								AurB	X	PSTK	Protein kinase - Non-receptor protein-serine/threonine	Protein-serine/threonine kinase	Other	AUR
209	103	PK530	AurKB (Aurora B, AIM-1)	S227	Aurora Kinase B (serine/threonine protein kinase 12)	0	11754	14	641	7525.34	13223.1	13051	172.13	1.3189	0	11240	14	596	6690.7	11690.1	12325.1	634.976	5.15191	6.47082	-5.5623		0	12332	14	628	7735.7	13234.6	12913.2	321.385	2.48881	3.80772	-1.05601			AurB	X	PSTK	Protein kinase - Non-receptor protein-serine/threonine	Protein-serine/threonine kinase	Other	AUR
210	103	PK530	AurKB (Aurora B, AIM-1)	S227	Aurora Kinase B (serine/threonine protein kinase 12)	0	11650	16	630	7329.42	12878.9				0	12154	14	611	7417.54	12960							0	11792	16	625	7360	12591.8								AurB	X	PSTK	Protein kinase - Non-receptor protein-serine/threonine	Protein-serine/threonine kinase	Other	AUR
211	104	PK531	AurKB (Aurora B, AIM-1)	T232	Aurora Kinase B (serine/threonine protein kinase 12)	0	1836	18	604	1098.07	1929.47	1771.73	157.739	8.90309	0	1608	16	521	829.432	1449.2	1745.84	296.642	16.9914	25.8945	-1.46164		0	1892	12	586	1101.68	1884.8	1896.13	11.3258	0.597311	9.5004	7.02085			AurB	X	PSTK	Protein kinase - Non-receptor protein-serine/threonine	Protein-serine/threonine kinase	Other	AUR
212	104	PK531	AurKB (Aurora B, AIM-1)	T232	Aurora Kinase B (serine/threonine protein kinase 12)	0	1674	16	554	918.532	1614				0	1818	14	648	1168.99	2042.48							0	1725	15	652	1114.92	1907.45								AurB	X	PSTK	Protein kinase - Non-receptor protein-serine/threonine	Protein-serine/threonine kinase	Other	AUR
213	105	NK009-2	AurKC (Aurora C, AIK3)	Pan-specific	Aurora Kinase C (serine/threonine-protein kinase 13)	0	5532	18	842	4642.79	8158.06	7712.81	445.25	5.77287	0	5768	18	832	4784	8358.68	7373.93	984.746	13.3544	19.1273	-4.39372		0	5820	12	752	4367.62	7472.3	6488.88	983.417	15.1554	20.9283	-15.8688			AurC	X	PSTK	Protein kinase - Non-receptor protein-serine/threonine	Protein-serine/threonine kinase	Other	AUR
214	105	NK009-2	AurKC (Aurora C, AIK3)	Pan-specific	Aurora Kinase C (serine/threonine-protein kinase 13)	0	5514	14	752	4136	7267.56				0	5366	12	683	3656.78	6389.18							0	4910	12	657	3217.99	5505.46								AurC	X	PSTK	Protein kinase - Non-receptor protein-serine/threonine	Protein-serine/threonine kinase	Other	AUR
215	106	NK009-3	AurKC (Aurora C, AIK3)	Pan-specific	Aurora Kinase C (serine/threonine-protein kinase 13)	0	2002	12	577	1148.23	2017.61	1966.17	51.4422	2.61637	0	2002	12	551	1096.49	1915.8	1795.96	119.841	6.67283	9.2892	-8.65665		0	2127	10	522	1105.07	1890.61	1889.71	0.898192	0.0475307	2.6639	-3.8887			AurC	X	PSTK	Protein kinase - Non-receptor protein-serine/threonine	Protein-serine/threonine kinase	Other	AUR
216	106	NK009-3	AurKC (Aurora C, AIK3)	Pan-specific	Aurora Kinase C (serine/threonine-protein kinase 13)	0	1896	14	579	1089.68	1914.72				0	1893	12	510	959.31	1676.12							0	1898	14	586	1104.02	1888.81								AurC	X	PSTK	Protein kinase - Non-receptor protein-serine/threonine	Protein-serine/threonine kinase	Other	AUR
217	107	PK532	AurKC (Aurora C, AIK3)	S193	Aurora Kinase C (serine/threonine-protein kinase 13)	0	7175	16	743	5319.14	9346.51	9437.95	91.4446	0.968903	0	7396	20	780	5753.28	10052.2	9132.92	919.297	10.0658	11.0347	-3.23194		0	7106	10	696	4938.82	8449.53	7901.07	548.462	6.94161	7.91051	-16.284			AurC	X	PSTK	Protein kinase - Non-receptor protein-serine/threonine	Protein-serine/threonine kinase	Other	AUR
218	107	PK532	AurKC (Aurora C, AIK3)	S193	Aurora Kinase C (serine/threonine-protein kinase 13)	0	7274	14	747	5423.22	9529.39				0	6782	18	695	4700.98	8213.62							0	6438	14	669	4297.66	7352.61								AurC	X	PSTK	Protein kinase - Non-receptor protein-serine/threonine	Protein-serine/threonine kinase	Other	AUR
219	108	NK010-2	Axl (UFO)	Pan-specific	AXL oncogene-encoded protein-tyrosine kinase UFO	0	4452	10	653	2900.63	5096.83	4934.27	162.559	3.29449	0	4212	14	609	2556.58	4466.9	4587.82	120.923	2.63574	5.93023	-7.02121		0	4570	12	615	2803.17	4795.78	4523.48	272.301	6.01972	9.31421	-8.32522			AXL	X	PYK	Protein kinase - Receptor-tyrosine kinase	Protein-tyrosine kinase	TK	Axl
220	108	NK010-2	Axl (UFO)	Pan-specific	AXL oncogene-encoded protein-tyrosine kinase UFO	0	4540	14	600	2715.6	4771.71				0	4391	16	616	2695	4708.74							0	4341	12	574	2484.85	4251.18								AXL	X	PYK	Protein kinase - Receptor-tyrosine kinase	Protein-tyrosine kinase	TK	Axl
221	109	NK010-3	Axl (UFO)	Pan-specific	AXL oncogene-encoded protein-tyrosine kinase UFO	0	1686	14	594	993.168	1745.14	1939.49	194.349	10.0206	0	1506	14	560	835.52	1459.83	1641.14	181.305	11.0475	21.0681	-15.3831		0	2301	12	540	1236.06	2114.7	2294.92	180.218	7.85292	17.8735	18.3259			AXL	X	PYK	Protein kinase - Receptor-tyrosine kinase	Protein-tyrosine kinase	TK	Axl
222	109	NK010-3	Axl (UFO)	Pan-specific	AXL oncogene-encoded protein-tyrosine kinase UFO	0	2115	14	578	1214.38	2133.84				0	1888	12	556	1043.06	1822.44							0	2353	12	618	1446.74	2475.14								AXL	X	PYK	Protein kinase - Receptor-tyrosine kinase	Protein-tyrosine kinase	TK	Axl
223	110	PK533	Axl (UFO)	Y702+Y703	AXL oncogene-encoded protein-tyrosine kinase UFO	0	4954	18	758	3741.49	6574.34	6493.53	80.8182	1.2446	0	5992	18	898	5364.65	9373.2	7975.43	1397.77	17.526	18.7706	22.8212		0	5532	12	739	4079.28	6979	6389.84	589.159	9.22024	10.4648	-1.59672			AXL	X	PYK	Protein kinase - Receptor-tyrosine kinase	Protein-tyrosine kinase	TK	Axl
224	110	PK533	Axl (UFO)	Y702+Y703	AXL oncogene-encoded protein-tyrosine kinase UFO	0	4880	14	750	3649.5	6412.71				0	5166	16	731	3764.65	6577.65							0	4776	14	712	3390.54	5800.68								AXL	X	PYK	Protein kinase - Receptor-tyrosine kinase	Protein-tyrosine kinase	TK	Axl
225	111	PN573	B-Myb (MYBL2)	T487	Myb-related protein B	0	8360	12	710	5927.08	10414.8	9529.56	885.194	9.28894	0	10305	18	715	7355.2	12851.1	11670.7	1180.44	10.1145	19.4035	22.4683		0	8812	14	680	5982.64	10235.3	9722.19	513.158	5.27822	14.5672	2.02144						Transcription protein					X
226	111	PN573	B-Myb (MYBL2)	T487	Myb-related protein B	0	7242	18	681	4919.54	8644.36				0	9004	16	668	6003.98	10490.3							0	7193	16	750	5382.75	9209.03											Transcription protein					X
227	112	PN206	B-Myb (MYBL2)	T487	Myb-related protein B	0	606	10	579	345.084	606.363	523.359	83.0041	15.8599	0	450	16	528	229.152	400.378	441.818	41.4404	9.37952	25.2394	-15.5803		0	592	10	560	325.92	557.597	469.994	87.6036	18.6393	34.4992	-10.1967						Transcription protein					X
228	112	PN206	B-Myb (MYBL2)	T487	Myb-related protein B	0	464	10	552	250.608	440.355				0	478	10	591	276.588	483.259							0	446	12	515	223.51	382.39											Transcription protein					X
229	113	NN177-2	B23 (NPM)	Pan-specific	B23 (nucleophosmin, numatrin, nucleolar protein NO38)	0	126	12	494	56.316	98.9555	96.4463	2.50921	2.60166	0	135	12	571	70.233	122.712	100.578	22.1346	22.0075	24.6091	4.28351		0	132	12	492	59.04	101.008	104.901	3.89302	3.71113	6.31279	8.76635
230	113	NN177-2	B23 (NPM)	Pan-specific	B23 (nucleophosmin, numatrin, nucleolar protein NO38)	0	122	14	495	53.46	93.9371				0	102	10	488	44.896	78.443							0	135	12	517	63.591	108.794
231	114	PN009	B23 (NPM)	T234+T237	B23 (nucleophosmin, numatrin, nucleolar protein NO38)	0	14	2	731	8.772	15.4137	15.0447	0.369001	2.4527	0	18	2	735	11.76	20.5473	19.6789	0.868366	4.41268	6.86538	30.8028		0	14	2	735	8.82	15.0896	12.4447	2.64496	21.2538	23.7065	-17.2821
232	114	PN009	B23 (NPM)	T234+T237	B23 (nucleophosmin, numatrin, nucleolar protein NO38)	0	14	2	696	8.352	14.6757				0	16	2	769	10.766	18.8105							0	10	2	716	5.728	9.7997
233	115	PN207	Bad	S75	Bcl2 antagonist of cell death	0	370	14	510	181.56	319.028	265.414	53.6141	20.2002	0	320	10	477	147.87	258.361	216.595	41.7654	19.2827	39.4829	-18.3933		0	362	10	501	176.352	301.71	303.176	1.46619	0.48361	20.6838	14.228						Apoptosis protein
234	115	PN207	Bad	S75	Bcl2 antagonist of cell death	0	254	10	494	120.536	211.799				0	171	18	654	100.062	174.83							0	332	10	553	178.066	304.643											Apoptosis protein
235	116	PN208	Bad	S99	Bcl2 antagonist of cell death	0	192	10	491	89.362	157.022	161.39	4.36827	2.70665	0	198	8	500	95	165.985	156.407	9.57823	6.12391	8.83055	-3.08768		0	186	12	459	79.866	136.638	139.743	3.10518	2.22206	4.9287	-13.4129						Apoptosis protein
236	116	PN208	Bad	S99	Bcl2 antagonist of cell death	0	212	10	467	94.334	165.759				0	198	10	447	84.036	146.829							0	210	14	426	83.496	142.848											Apoptosis protein
237	119	NK257-1	BCKD (BCKDK)	Pan-specific	[3-methyl-2-oxobutanoate dehydrogenase [lipoamide]] kinase, mitochondrial	0	3970	10	750	2970	5218.73	5112	106.729	2.08782	0	4240	18	864	3647.81	6373.51	5660.46	713.047	12.597	14.6848	10.7289		0	4172	8	679	2827.36	4837.16	4520.97	316.187	6.99378	9.08159	-11.5615			BCKDK	X	PSTK	Protein kinase - Non-receptor protein-serine/threonine	Protein-serine/threonine kinase	Atypical	PDHK
238	119	NK257-1	BCKD (BCKDK)	Pan-specific	[3-methyl-2-oxobutanoate dehydrogenase [lipoamide]] kinase, mitochondrial	0	4024	12	710	2848.52	5005.27				0	4100	14	693	2831.6	4947.41							0	3621	12	681	2457.73	4204.78								BCKDK	X	PSTK	Protein kinase - Non-receptor protein-serine/threonine	Protein-serine/threonine kinase	Atypical	PDHK
239	120	NK257-2	BCKD (BCKDK)	Pan-specific	[3-methyl-2-oxobutanoate dehydrogenase [lipoamide]] kinase, mitochondrial	0	1262	16	625	778.75	1368.38	1340.94	27.4361	2.04603	0	1247	18	642	789.018	1378.58	1416.29	37.7084	2.66247	4.7085	5.61922		0	1326	14	577	757.024	1295.15	1183.19	111.959	9.46249	11.5085	-11.7644			BCKDK	X	PSTK	Protein kinase - Non-receptor protein-serine/threonine	Protein-serine/threonine kinase	Atypical	PDHK
240	120	NK257-2	BCKD (BCKDK)	Pan-specific	[3-methyl-2-oxobutanoate dehydrogenase [lipoamide]] kinase, mitochondrial	0	1153	10	654	747.522	1313.51				0	1236	14	681	832.182	1454							0	1086	12	583	626.142	1071.23								BCKDK	X	PSTK	Protein kinase - Non-receptor protein-serine/threonine	Protein-serine/threonine kinase	Atypical	PDHK
241	121	PN574	BCLAF1	S512	Bcl-2-associated transcription factor 1	0	8252	18	784	6455.46	11343.2	11032	311.225	2.82112	0	8348	16	783	6523.96	11398.8	11072.2	326.602	2.94976	5.77088	0.364337		0	8020	12	797	6382.38	10919.2	9949.1	970.129	9.75092	12.572	-9.81562						Transcription protein					X
242	121	PN574	BCLAF1	S512	Bcl-2-associated transcription factor 1	0	7631	14	801	6101.22	10720.7				0	8093	22	762	6150.1	10745.6							0	7344	14	716	5248.28	8978.97											Transcription protein					X
243	122	NK362-1	Bcr	Pan-specific	Breakpoint cluster region protein	0	390	8	547	208.954	367.163	363.823	3.33946	0.917879	0	530	16	653	335.642	586.439	455.868	130.571	28.6423	29.5602	25.2992		0	534	10	519	271.956	465.274	432.215	33.0586	7.64864	8.56652	18.798			BCR	X	PSTK	Protein kinase - Receptor-serine kinase	Protein-serine/threonine kinase	Atypical	BCR
244	122	NK362-1	Bcr	Pan-specific	Breakpoint cluster region protein	0	376	9	559	205.153	360.484				0	358	10	535	186.18	325.297							0	470	8	505	233.31	399.156								BCR	X	PSTK	Protein kinase - Receptor-serine kinase	Protein-serine/threonine kinase	Atypical	BCR
245	123	PK164	Bcr	Y177	Breakpoint cluster region protein	0	125	8	434	50.778	89.2244	96.694	7.46963	7.72502	0	468	14	327	148.458	259.388	178.263	81.1249	45.5085	53.2336	84.3579		0	84	8	442	33.592	57.4706	73.7304	16.2598	22.0531	29.7781	-23.7487			BCR	X	PSTK	Protein kinase - Receptor-serine kinase	Protein-serine/threonine kinase	Atypical	BCR
246	123	PK164	Bcr	Y177	Breakpoint cluster region protein	0	234	6	260	59.28	104.164				0	256	10	226	55.596	97.1382							0	210	10	263	52.6	89.9903								BCR	X	PSTK	Protein kinase - Receptor-serine kinase	Protein-serine/threonine kinase	Atypical	BCR
247	124	PK538	Bcr	Y177	Breakpoint cluster region protein	0	2503	10	854	2129.02	3741	3795.36	54.3573	1.4322	0	4604	16	747	3427.24	5988.12	4436.06	1552.05	34.9872	36.4194	16.8812		0	1404	10	850	1184.9	2027.18	3156.86	1129.68	35.785	37.2172	-16.8233			BCR	X	PSTK	Protein kinase - Receptor-serine kinase	Protein-serine/threonine kinase	Atypical	BCR
248	124	PK538	Bcr	Y177	Breakpoint cluster region protein	0	3448	14	638	2190.89	3849.72				0	1842	10	901	1650.63	2884.01							0	3752	18	671	2505.51	4286.54								BCR	X	PSTK	Protein kinase - Receptor-serine kinase	Protein-serine/threonine kinase	Atypical	BCR
249	125	PK539	Bcr	Y591	Breakpoint cluster region protein	0	4913	18	673	3294.34	5788.63	5412.5	376.13	6.94929	0	4882	20	630	3063.06	5351.82	5322.53	29.2903	0.550308	7.4996	-1.66218		0	5256	18	625	3273.75	5600.87	5962.97	362.1	6.07247	13.0218	10.1703			BCR	X	PSTK	Protein kinase - Receptor-serine kinase	Protein-serine/threonine kinase	Atypical	BCR
250	125	PK539	Bcr	Y591	Breakpoint cluster region protein	0	4872	14	590	2866.22	5036.37				0	4682	14	649	3029.53	5293.24							0	5048	18	735	3697.05	6325.07								BCR	X	PSTK	Protein kinase - Receptor-serine kinase	Protein-serine/threonine kinase	Atypical	BCR
251	126	PK540	Bcr	Y644	Breakpoint cluster region protein	0	6252	14	737	4597.41	8078.32	8520.46	442.141	5.18917	0	6492	20	772	4996.38	8729.76	8031.86	697.894	8.68906	13.8782	-5.73437		0	6257	16	700	4368.7	7474.15	6970.42	503.732	7.2267	12.4159	-18.192			BCR	X	PSTK	Protein kinase - Receptor-serine kinase	Protein-serine/threonine kinase	Atypical	BCR
252	126	PK540	Bcr	Y644	Breakpoint cluster region protein	0	5353	12	955	5100.65	8962.6				0	5926	14	710	4197.52	7333.97							0	5532	14	685	3779.83	6466.69								BCR	X	PSTK	Protein kinase - Receptor-serine kinase	Protein-serine/threonine kinase	Atypical	BCR
253	127	PK541	BLK	Y187	B lymphoid tyrosine kinase	0	534	12	536	279.792	491.636	454.606	37.0301	8.14555	0	492	12	501	240.48	420.17	377.716	42.4547	11.2399	19.3854	-16.9136		0	561	10	490	269.99	461.91	472.516	10.6055	2.24448	10.39	3.93969			BLK	X	PYK	Protein kinase - Non-receptor protein-tyrosine	Protein-tyrosine kinase	TK	Src
254	127	PK541	BLK	Y187	B lymphoid tyrosine kinase	0	505	14	484	237.644	417.575				0	395	12	501	191.883	335.261							0	466	12	622	282.388	483.121								BLK	X	PYK	Protein kinase - Non-receptor protein-tyrosine	Protein-tyrosine kinase	TK	Src
255	128	PK542	BLK	Y188	B lymphoid tyrosine kinase	0	14	2	731	8.772	15.4137	13.2735	2.1402	16.1239	0	10	2	752	6.016	10.5112	8.01622	2.49502	31.1247	47.2486	-39.6073		0	12	2	707	7.07	12.0956	9.74324	2.35241	24.144	40.2679	-26.5962			BLK	X	PYK	Protein kinase - Non-receptor protein-tyrosine	Protein-tyrosine kinase	TK	Src
256	128	PK542	BLK	Y188	B lymphoid tyrosine kinase	0	10	2	792	6.336	11.1333				0	6	2	790	3.16	5.5212							0	10	4	720	4.32	7.39083								BLK	X	PYK	Protein kinase - Non-receptor protein-tyrosine	Protein-tyrosine kinase	TK	Src
257	129	PK543	BLK	Y389	B lymphoid tyrosine kinase	0	4159	12	755	3130.99	5501.6	5401.11	100.486	1.86047	0	4118	18	766	3140.6	5487.3	5445.84	41.4649	0.761405	2.62187	0.828058		0	4435	14	825	3647.32	6239.99	5942.54	297.452	5.00547	6.86593	10.0244			BLK	X	PYK	Protein kinase - Non-receptor protein-tyrosine	Protein-tyrosine kinase	TK	Src
258	129	PK543	BLK	Y389	B lymphoid tyrosine kinase	0	3942	9	767	3016.61	5300.63				0	4000	14	776	3093.14	5404.37							0	4035	16	821	3299.6	5645.09								BLK	X	PYK	Protein kinase - Non-receptor protein-tyrosine	Protein-tyrosine kinase	TK	Src
259	130	PN013	BLNK	Y84	B-cell linker protein	0	923	14	580	527.22	926.403	897.015	29.3883	3.27623	0	1151	16	701	795.635	1390.15	1270.29	119.855	9.43521	12.7114	41.6132		0	1034	12	568	580.496	993.137	1142.48	149.339	13.0716	16.3478	27.3642
260	130	PN013	BLNK	Y84	B-cell linker protein	0	918	12	545	493.77	867.626				0	1130	14	590	658.44	1150.44							0	1262	16	606	755.076	1291.82
261	131	NK363-1	BMPR2 (BMPR-II)	Pan-specific	Bone morphogenetic protein receptor type-2	0	104	10	506	47.564	83.5769	72.3277	11.2493	15.5532	0	84	8	473	35.948	62.8089	46.5318	16.2771	34.9805	50.5337	-35.6652		0	32	6	652	16.952	29.0022	35.8182	6.81599	19.0294	34.5826	-50.4779			BMPR2	X	PSTK
262	131	NK363-1	BMPR2 (BMPR-II)	Pan-specific	Bone morphogenetic protein receptor type-2	0	98	10	395	34.76	61.0784				0	34	8	666	17.316	30.2548							0	78	8	356	24.92	42.6342								BMPR2	X	PSTK
263	132	PK544	BMPR2 (BMPR-II)	S375	Bone morphogenetic protein receptor type-2	0	4468	12	917	4086.15	7179.97	6453.98	725.993	11.2488	0	4712	18	846	3971.12	6938.41	6135.62	802.789	13.0841	24.3329	-4.93273		0	4381	8	739	3231.65	5528.84	5043.43	485.406	9.62452	20.8733	-21.8555			BMPR2	X	PSTK	Protein kinase - Non-receptor protein-serine/threonine	Protein-serine/threonine kinase	TKL	STKR	Type2
264	132	PK544	BMPR2 (BMPR-II)	S375	Bone morphogenetic protein receptor type-2	0	4204	14	778	3259.82	5727.98				0	4327	16	708	3052.19	5332.83							0	3818	12	700	2664.2	4558.02								BMPR2	X	PSTK	Protein kinase - Non-receptor protein-serine/threonine	Protein-serine/threonine kinase	TKL	STKR	Type2
265	133	NK012	Bmx (Etk)	Pan-specific	Bone marrow X protein-tyrosine kinase	0	139	8	352	46.112	81.0256	68.9575	12.0681	17.5008	0	254	10	402	98.088	171.381	121.763	49.6174	40.749	58.2498	76.5776		0	40	5	659	23.065	39.4606	52.3731	12.9126	24.655	42.1557	-24.0501			BMX	X	PYK
266	133	NK012	Bmx (Etk)	Pan-specific	Bone marrow X protein-tyrosine kinase	0	122	8	284	32.376	56.8894				0	158	10	279	41.292	72.146							0	130	10	318	38.16	65.2857								BMX	X	PYK
267	134	PK545	Bmx (Etk)	Y40	Bone marrow X protein-tyrosine kinase	0	2363	14	584	1371.82	2410.48	2384.93	25.5559	1.07156	0	2252	14	530	1186.14	2072.44	2085.56	13.1146	0.62883	1.70039	-12.5526		0	2292	10	541	1234.56	2112.14	2028.77	83.3659	4.10918	5.18074	-14.9335			BMX	X	PYK	Protein kinase - Non-receptor-tyrosine kinase	Protein-tyrosine kinase	TK	Tec
268	134	PK545	Bmx (Etk)	Y40	Bone marrow X protein-tyrosine kinase	0	2204	10	612	1342.73	2359.37				0	2222	14	544	1201.15	2098.67							0	2250	16	509	1137.11	1945.41								BMX	X	PYK	Protein kinase - Non-receptor-tyrosine kinase	Protein-tyrosine kinase	TK	Tec
269	135	NN395-1	BRCA1	Pan-specific	Breast cancer type 1 susceptibility protein homolog	0	164	12	532	80.864	142.09	157.37	15.2801	9.70969	0	226	14	637	135.044	235.951	194.349	41.6021	21.4059	31.1156	23.498		0	204	10	507	98.358	168.275	156.773	11.502	7.33672	17.0464	-0.37944							Transcription, coactivator/corepressor				X
270	135	NN395-1	BRCA1	Pan-specific	Breast cancer type 1 susceptibility protein homolog	0	188	10	552	98.256	172.65				0	171	10	543	87.423	152.747							0	195	12	464	84.912	145.271												Transcription, coactivator/corepressor				X
271	136	PN690	BRCA1	T509	Breast cancer type 1 susceptibility protein	0	3802	8	946	3589.12	6306.62	9346.27	3039.65	32.5226	0	12062	16	779	9383.83	16395.6	14494.9	1900.72	13.1131	45.6357	55.0871		0	11331	18	746	8439.5	14438.6	13590.5	848.119	6.24052	38.7631	45.4112				X		Transcription, coactivator/corepressor
272	136	PN690	BRCA1	T509	Breast cancer type 1 susceptibility protein	0	10374	8	680	7048.88	12385.9				0	10837	14	666	7208.12	12594.1							0	10271	12	726	7448.03	12742.4									X		Transcription, coactivator/corepressor
273	137	PN212	BRCA1	S988	Breast cancer type 1 susceptibility protein	0	280	12	558	149.544	262.771	247.227	15.5437	6.28723	0	280	14	667	177.422	309.994	258.495	51.4992	19.9227	26.2099	4.55783		0	293	10	511	144.613	247.41	272.3	24.8902	9.14072	15.4279	10.1417				X		Transcription, coactivator/corepressor
274	137	PN212	BRCA1	S988	Breast cancer type 1 susceptibility protein	0	250	12	554	131.852	231.683				0	246	10	502	118.472	206.996							0	302	12	599	173.71	297.19									X		Transcription, coactivator/corepressor
275	138	PN116	BRCA1	S1423	Breast cancer type 1 susceptibility protein	0	184	12	652	112.144	197.053	101.078	95.9754	94.9517	0	2028	12	367	739.872	1292.72	981.65	311.065	31.688	126.64	871.18	Possible	0	1307	8	309	401.391	686.716	345.658	341.059	98.6696	193.621	241.971				X		Transcription, coactivator/corepressor
276	138	PN116	BRCA1	S1423	Breast cancer type 1 susceptibility protein	1	10	2	363	2.904	5.10275				1	1373	12	282	383.802	670.585							1	9	2	384	2.688	4.59874									X		Transcription, coactivator/corepressor
277	139	NK013-2	BRD2	Pan-specific	Bromodomain-containing protein 2	0	170	8	523	84.726	148.876	142.903	5.97342	4.18006	0	138	10	496	63.488	110.927	103.163	7.76462	7.52659	11.7067	-27.8092		0	178	10	513	86.184	147.447	141.614	5.83311	4.11902	8.29909	-0.901709			BRD2	X	PSTK	Protein kinase - Non-receptor protein-serine/threonine	Protein-serine/threonine kinase	Atypical	BRD
278	139	NK013-2	BRD2	Pan-specific	Bromodomain-containing protein 2	0	161	12	523	77.927	136.929				0	128	8	455	54.6	95.3979							0	175	10	481	79.365	135.781								BRD2	X	PSTK	Protein kinase - Non-receptor protein-serine/threonine	Protein-serine/threonine kinase	Atypical	BRD
279	140	PK546	BRD2	S37	Bromodomain-containing protein-serine kinase 2	0	6528	10	763	4973.23	8738.7	8262.53	476.171	5.76302	0	6486	14	743	4808.7	8401.83	8023.65	378.181	4.71333	10.4763	-2.8912		0	6604	16	752	4954.18	8475.81	7768.24	707.57	9.1085	14.8715	-5.98233			BRD2	X	PSTK	Protein kinase - Non-receptor protein-serine/threonine	Protein-serine/threonine kinase	Atypical	BRD
280	140	PK546	BRD2	S37	Bromodomain-containing protein-serine kinase 2	0	5978	14	743	4431.25	7786.36				0	6138	18	715	4375.8	7645.46							0	5652	14	732	4127.02	7060.67								BRD2	X	PSTK	Protein kinase - Non-receptor protein-serine/threonine	Protein-serine/threonine kinase	Atypical	BRD
281	141	PK548	BRK	Y342	Protein-tyrosine kinase 6	0	4072	14	947	3842.93	6752.59	6016.11	736.475	12.2417	0	4768	16	830	3944.16	6891.3	6467.01	424.285	6.56076	18.8025	7.49488		0	4984	18	804	3992.66	6830.81	6362.32	468.497	7.36362	19.6053	5.75467			BRK	X	PYK	Protein kinase - Non-receptor protein-tyrosine	Protein-tyrosine kinase	TK	Src
282	141	PK548	BRK	Y342	Protein-tyrosine kinase 6	0	4352	10	692	3004.66	5279.64				0	4533	18	766	3458.49	6042.73							0	4443	15	778	3444.98	5893.82								BRK	X	PYK	Protein kinase - Non-receptor protein-tyrosine	Protein-tyrosine kinase	TK	Src
283	142	PK547	BRK	S446+Y447	Protein-tyrosine kinase 6	0	3839	18	731	2793.15	4907.98	4388.71	519.271	11.832	0	4081	20	860	3492.46	6102.08	5228.64	873.435	16.7048	28.5368	19.1386		0	2955	13	706	2077.05	3553.51	3529.66	23.8423	0.675483	12.5075	-19.5739			BRK	X	PYK	Protein kinase - Non-receptor protein-tyrosine	Protein-tyrosine kinase	TK	Src
284	142	PK547	BRK	S446+Y447	Protein-tyrosine kinase 6	0	3140	12	704	2202.11	3869.43				0	3806	12	657	2492.66	4355.21							0	2956	16	697	2049.18	3505.82								BRK	X	PYK	Protein kinase - Non-receptor protein-tyrosine	Protein-tyrosine kinase	TK	Src
285	143	NK364-1	BRSK1	Pan-specific	Protein-serine/threonine kinase BRSK1	0	162	8	614	94.556	166.149	153.316	12.8324	8.36991	0	154	12	581	82.502	144.149	152.927	8.77801	5.74001	14.1099	-0.254106		0	166	12	517	79.618	136.214	135.55	0.663806	0.489713	8.85963	-11.5881			BRSK1	X	PSTK	Protein kinase - Non-receptor protein-serine/threonine	Protein-serine/threonine kinase	CAMK	CAMKL	BRSK
286	143	NK364-1	BRSK1	Pan-specific	Protein-serine/threonine kinase BRSK1	0	142	12	615	79.95	140.484				0	162	12	617	92.55	161.705							0	168	10	499	78.842	134.886								BRSK1	X	PSTK	Protein kinase - Non-receptor protein-serine/threonine	Protein-serine/threonine kinase	CAMK	CAMKL	BRSK
287	144	PK549	BRSK1	T189	BR serine/threonine-protein kinase 1	0	9470	18	853	8062.56	14167.1	14579.3	412.188	2.82722	0	9624	18	823	7905.74	13813	13107.4	705.583	5.38307	8.21029	-10.0954		0	9762	16	777	7572.64	12955.6	12760.2	195.342	1.53087	4.35808	-12.4769			BRSK1	X	PSTK	Protein kinase - Non-receptor protein-serine/threonine	Protein-serine/threonine kinase	CAMK	CAMKL	BRSK
288	144	PK549	BRSK1	T189	BR serine/threonine-protein kinase 1	0	9542	20	896	8531.71	14991.5				0	9167	20	776	7098.07	12401.9							0	9348	16	787	7344.28	12564.9								BRSK1	X	PSTK	Protein kinase - Non-receptor protein-serine/threonine	Protein-serine/threonine kinase	CAMK	CAMKL	BRSK
289	145	NK014	Btk	Pan-specific	Bruton's agammaglobulinemia tyrosine kinase	0	706	12	615	426.81	749.968	776.984	27.0161	3.47705	0	646	14	629	397.528	694.567	652.667	41.9	6.41981	9.89686	-15.9999		0	716	10	562	396.772	678.814	637.607	41.2073	6.46281	9.93986	-17.9383			BTK	X	PYK	Protein kinase - Non-receptor- tyrosine kinase	Protein-tyrosine kinase	TK	Tec
290	145	NK014	Btk	Pan-specific	Bruton's agammaglobulinemia tyrosine kinase	0	752	14	620	457.56	804				0	621	12	574	349.566	610.767							0	595	14	600	348.6	596.399								BTK	X	PYK	Protein kinase - Non-receptor- tyrosine kinase	Protein-tyrosine kinase	TK	Tec
291	146	PK550	Btk	Y223+Y225	Bruton's agammaglobulinemia tyrosine kinase	0	1098	12	549	596.214	1047.64	1001.42	46.2147	4.61491	0	999	12	616	607.992	1062.29	1004.5	57.7944	5.75356	10.3685	0.307322		0	1084	12	485	519.92	889.501	884.936	4.56452	0.515803	5.13072	-11.6319			BTK	X	PYK	Protein kinase - Non-receptor- tyrosine kinase	Protein-tyrosine kinase	TK	Tec
292	146	PK550	Btk	Y223+Y225	Bruton's agammaglobulinemia tyrosine kinase	0	1030	12	534	543.612	955.206				0	1050	12	522	541.836	946.704							0	1033	12	504	514.584	880.372								BTK	X	PYK	Protein kinase - Non-receptor- tyrosine kinase	Protein-tyrosine kinase	TK	Tec
293	147	PK551	Btk	Y551	Bruton's agammaglobulinemia tyrosine kinase	0	4670	14	695	3235.92	5685.99	5703.95	17.9607	0.314882	0	4348	16	711	3080.05	5381.51	5027.83	353.682	7.03448	7.34936	-11.8535		0	4804	12	652	3124.38	5345.33	5732.12	386.794	6.74783	7.06271	0.493902			BTK	X	PYK	Protein kinase - Non-receptor- tyrosine kinase	Protein-tyrosine kinase	TK	Tec
294	147	PK551	Btk	Y551	Bruton's agammaglobulinemia tyrosine kinase	0	4865	12	671	3256.36	5721.91				0	4194	14	640	2675.2	4674.15							0	4898	12	732	3576.55	6118.91								BTK	X	PYK	Protein kinase - Non-receptor- tyrosine kinase	Protein-tyrosine kinase	TK	Tec
295	148	PK552	BUB1B (Bub1R)	S670	Mitotic checkpoint serine/threonine-protein kinase BUB1 beta	0	4390	14	725	3172.6	5574.72	5770.46	195.739	3.39209	0	4776	22	789	3750.91	6553.64	6054.06	499.576	8.25191	11.644	4.91469		0	4640	16	698	3227.55	5521.83	5467.32	54.5074	0.996967	4.38905	-5.25333			BUBR1	X	PSTK	Protein kinase - Non-receptor protein-serine/threonine	Protein-serine/threonine kinase	Other	BUB
296	148	PK552	BUB1B (Bub1R)	S670	Mitotic checkpoint serine/threonine-protein kinase BUB1 beta	0	4676	12	728	3395.39	5966.2				0	4564	16	699	3179.05	5554.49							0	4624	12	686	3163.83	5412.81								BUBR1	X	PSTK	Protein kinase - Non-receptor protein-serine/threonine	Protein-serine/threonine kinase	Other	BUB
297	149	PN575	C-EBPa	T226+T230	CCAAT/enhancer-binding protein alpha	0	3978	12	645	2558.07	4494.9	4430.09	64.8194	1.46316	0	4240	18	620	2617.64	4573.58	4102.11	471.472	11.4934	12.9566	-7.4034		0	3653	14	615	2237.99	3828.84	3682.95	145.888	3.96117	5.42433	-16.865						Transcription protein					X
298	149	PN575	C-EBPa	T226+T230	CCAAT/enhancer-binding protein alpha	0	3731	12	668	2484.29	4365.27				0	3530	14	591	2077.96	3630.64							0	3458	18	601	2067.44	3537.06											Transcription protein					X
299	150	PN216	C3G (RapGEF1)	Y504	Rap guanine nucleotide exchange factor 1	0	126	8	503	59.354	104.294	98.4319	5.86184	5.95523	0	108	12	543	52.128	91.0788	86.1202	4.9586	5.75776	11.713	-12.5078		0	118	10	478	51.624	88.3205	98.4538	10.1333	10.2925	16.2477	0.0222846
300	150	PN216	C3G (RapGEF1)	Y504	Rap guanine nucleotide exchange factor 1	0	116	10	497	52.682	92.57				0	106	8	474	46.452	81.1616							0	120	10	577	63.47	108.587
301	151	PN691	CAD	S1859	Aspartate carbamoyltransferase	0	2544	14	628	1588.84	2791.83	2623.72	168.106	6.40717	0	2199	14	633	1383.11	2416.58	2569.42	152.833	5.94817	12.3553	-2.06972		0	2670	16	666	1767.56	3024.02	2727.36	296.66	10.8772	17.2843	3.95022						De novo pyrimidine synthesis
302	151	PN691	CAD	S1859	Aspartate carbamoyltransferase	0	2248	12	625	1397.5	2455.61				0	2560	10	611	1558.05	2722.25							0	2374	10	601	1420.76	2430.7											De novo pyrimidine synthesis
303	153	PN015	CALD1	S789	Caldesmon	0	248	8	300	72	126.515	128.564	2.04971	1.59431	0	486	10	333	158.508	276.948	188.03	88.9175	47.289	48.8833	46.2537		0	208	11	295	58.115	99.4255	85.1614	14.2641	16.7495	18.3438	-33.7597
304	153	PN015	CALD1	S789	Caldesmon	0	297	10	259	74.333	130.614				0	234	8	251	56.726	99.1125							0	156	8	280	41.44	70.8973
305	154	NK211	CaMK1a (CAMK1)	Pan-specific	Calcium/calmodulin-dependent protein-serine kinase 1 alpha	0	204	12	605	116.16	204.11	174.4	29.7098	17.0354	0	148	12	594	80.784	141.147	136.557	4.58993	3.36118	20.3966	-21.6991		0	180	14	664	110.224	188.576	200.275	11.6987	5.84135	22.8768	14.8361			CaMK1a	X	PSTK	Protein kinase - Non-receptor- tyrosine kinase	Protein-tyrosine kinase	TK	Tec
306	154	NK211	CaMK1a (CAMK1)	Pan-specific	Calcium/calmodulin-dependent protein-serine kinase 1 alpha	0	156	10	564	82.344	144.691				0	144	14	581	75.53	131.967							0	196	19	700	123.9	211.973								CaMK1a	X	PSTK	Protein kinase - Non-receptor- tyrosine kinase	Protein-tyrosine kinase	TK	Tec
307	155	PK553	CaMK1a (CAMK1)	T177	Calcium/calmodulin-dependent protein-serine kinase 1 alpha	0	3148	12	666	2088.58	3669.93	3190.59	479.344	15.0237	0	2366	14	574	1350.05	2358.82	2818.47	459.65	16.3085	31.3322	-11.6629		0	3092	14	628	1932.98	3307.03	3231.77	75.2633	2.32886	17.3526	1.29052			CaMK1a	X	PSTK	Protein kinase - Non-receptor- tyrosine kinase	Protein-tyrosine kinase	TK	Tec
308	155	PK553	CaMK1a (CAMK1)	T177	Calcium/calmodulin-dependent protein-serine kinase 1 alpha	0	2525	12	614	1542.98	2711.25				0	2962	12	636	1876.2	3278.13							0	2966	14	625	1845	3156.5								CaMK1a	X	PSTK	Protein kinase - Non-receptor- tyrosine kinase	Protein-tyrosine kinase	TK	Tec
309	156	PK874	CaMK1a (CAMK1)	Y235	Calcium/calmodulin-dependent protein-serine kinase 1 alpha	0	4334	12	866	3742.85	6576.74	6033.43	543.312	9.00502	0	4481	18	795	3548.09	6199.27	6284.68	85.417	1.35913	10.3642	4.16439		0	4056	20	953	3846.31	6580.42	6371.96	208.464	3.27159	12.2766	5.6109			CaMK1a	X	PSTK	Protein kinase - Non-receptor- tyrosine kinase	Protein-tyrosine kinase	TK	Tec
310	156	PK874	CaMK1a (CAMK1)	Y235	Calcium/calmodulin-dependent protein-serine kinase 1 alpha	0	3966	16	791	3124.45	5490.12				0	4344	14	842	3645.86	6370.1							0	3659	20	990	3602.61	6163.49								CaMK1a	X	PSTK	Protein kinase - Non-receptor- tyrosine kinase	Protein-tyrosine kinase	TK	Tec
311	157	NK016-3	CaMK1d	Pan-specific	Calcium/calmodulin-dependent protein-serine kinase 1 delta	0	50	10	655	26.2	46.0372	55.9159	9.87868	17.667	0	88	10	556	43.368	75.7732	54.0064	21.7668	40.3041	57.9711	-3.41496		0	58	8	662	33.1	56.6289	56.4646	0.164241	0.290874	17.9579	0.981261			CaMK1d	X	PSTK	Protein kinase - Non-receptor- tyrosine kinase	Protein-tyrosine kinase	TK	Tec
312	157	NK016-3	CaMK1d	Pan-specific	Calcium/calmodulin-dependent protein-serine kinase 1 delta	0	84	10	506	37.444	65.7946				0	38	10	659	18.452	32.2396							0	88	12	433	32.908	56.3004								CaMK1d	X	PSTK	Protein kinase - Non-receptor protein-serine/threonine	Protein-serine/threonine kinase	CAMK	CAMK1
313	158	NK016-2	CaMK1d	Pan-specific	Calcium/calmodulin-dependent protein-serine kinase 1 delta	0	210	8	594	119.988	210.837	207.755	3.08204	1.4835	0	212	10	610	123.22	215.292	233.655	18.3632	7.85912	9.34262	12.4669		0	322	8	596	187.144	320.174	266.71	53.4638	20.0457	21.5292	28.3774			CaMK1d	X	PSTK	Protein kinase - Non-receptor protein-serine/threonine	Protein-serine/threonine kinase	CAMK	CAMK1
314	158	NK016-2	CaMK1d	Pan-specific	Calcium/calmodulin-dependent protein-serine kinase 1 delta	0	222	14	560	116.48	204.672				0	250	10	601	144.24	252.018							0	231	10	564	124.644	213.246								CaMK1d	X	PSTK	Protein kinase - Non-receptor protein-serine/threonine	Protein-serine/threonine kinase	CAMK	CAMK1
315	159	PK554	CaMK1d	T180	Calcium/calmodulin-dependent protein-serine kinase 1 delta	0	3398	16	781	2641.34	4641.23	4386.77	254.454	5.80049	0	3614	16	771	2774.06	4846.88	4744.65	102.23	2.15463	7.95512	8.15805		0	3608	14	885	3180.69	5441.66	5045.22	396.439	7.85771	13.6582	15.0098			CaMK1d	X	PSTK	Protein kinase - Non-receptor protein-serine/threonine	Protein-serine/threonine kinase	CAMK	CAMK1
316	159	PK554	CaMK1d	T180	Calcium/calmodulin-dependent protein-serine kinase 1 delta	0	3190	12	740	2351.72	4132.32				0	3554	16	751	2657.04	4642.42							0	3679	12	741	2717.25	4648.78								CaMK1d	X	PSTK	Protein kinase - Non-receptor protein-serine/threonine	Protein-serine/threonine kinase	CAMK	CAMK1
317	160	NK302-2	CaMK2a	Pan-specific	Calcium/calmodulin-dependent protein kinase type II subunit alpha	0	26	10	914	14.624	25.6965	41.184	15.4875	37.6056	0	7834	10	416	3254.78	5686.81	6694.76	1007.95	15.0559	52.6615	16155.7	Likely Ab spot mis-print	0	1344	10	374	498.916	853.566	2611.88	1758.32	67.3199	104.925	6241.98	Likely Ab spot mis-print		CaMK2a	X	PSTK	Protein kinase - Non-receptor protein-serine/threonine	Protein-serine/threonine kinase	CAMK	CAMK2
318	160	NK302-2	CaMK2a	Pan-specific	Calcium/calmodulin-dependent protein kinase type II subunit alpha	0	54	10	733	32.252	56.6715				0	12650	18	349	4408.57	7702.72							0	5268	12	486	2554.42	4370.2								CaMK2a	X	PSTK	Protein kinase - Non-receptor protein-serine/threonine	Protein-serine/threonine kinase	CAMK	CAMK2
319	161	PK875	CaMK2a	Y230	Calcium/calmodulin-dependent protein-serine kinase 2 alpha	0	5614	14	798	4468.8	7852.34	10590.8	2738.43	25.8568	0	10746	20	857	9192.18	16060.7	14875.1	1185.62	7.97049	33.8273	40.4535		0	8898	16	817	7256.59	12414.9	11874.5	540.36	4.55058	30.4074	12.1214			CaMK2a	X	PSTK	Protein kinase - Non-receptor protein-serine/threonine	Protein-serine/threonine kinase	CAMK	CAMK2
320	161	PK875	CaMK2a	Y230	Calcium/calmodulin-dependent protein-serine kinase 2 alpha	0	9508	14	799	7585.71	13329.2				0	9612	22	817	7835.03	13689.5							0	8865	20	749	6624.9	11334.2								CaMK2a	X	PSTK	Protein kinase - Non-receptor protein-serine/threonine	Protein-serine/threonine kinase	CAMK	CAMK2
321	162	PK555	CaMK2a	T286	Calcium/calmodulin-dependent protein-serine kinase 2 alpha	0	6721	12	857	5749.61	10102.9	9828.27	274.646	2.79445	0	8224	24	941	7716.2	13481.9	11358.8	2123.08	18.6911	21.4856	15.5725		0	6682	16	806	5372.8	9192	9657.23	465.233	4.81745	7.61191	-1.74022			CaMK2a	X	PSTK	Protein kinase - Non-receptor protein-serine/threonine	Protein-serine/threonine kinase	CAMK	CAMK2
322	162	PK555	CaMK2a	T286	Calcium/calmodulin-dependent protein-serine kinase 2 alpha	0	6679	16	816	5437.01	9553.62				0	7010	18	756	5285.95	9235.7							0	6386	24	930	5916.66	10122.5								CaMK2a	X	PSTK	Protein kinase - Non-receptor protein-serine/threonine	Protein-serine/threonine kinase	CAMK	CAMK2
323	163	PK178	CaMK2a	T286	Calcium/calmodulin-dependent protein-serine kinase 2 alpha	0	128	10	457	53.926	94.7559	87.4989	7.25702	8.29384	0	48	14	786	26.724	46.6926	78.3084	31.6159	40.3735	48.6673	-10.5035		0	206	14	457	87.744	150.116	133.815	16.3009	12.1817	20.4755	52.9336			CaMK2a	X	PSTK	Protein kinase - Non-receptor protein-serine/threonine	Protein-serine/threonine kinase	CAMK	CAMK2
324	163	PK178	CaMK2a	T286	Calcium/calmodulin-dependent protein-serine kinase 2 alpha	0	130	12	387	45.666	80.2419				0	184	18	379	62.914	109.924							0	124	18	648	68.688	117.514								CaMK2a	X	PSTK	Protein kinase - Non-receptor protein-serine/threonine	Protein-serine/threonine kinase	CAMK	CAMK2
325	164	NK018-3	CaMK2b	Pan-specific	Calcium/calmodulin-dependent protein-serine kinase 2 beta	0	4648	14	859	3980.61	6994.51	6395.16	599.346	9.37187	0	4554	20	771	3495.71	6107.76	6311.65	203.884	3.23029	12.6022	-1.3059		0	4420	18	796	3503.99	5994.77	6561.66	566.889	8.63941	18.0113	2.60353			CAMK2b	X	PSTK	Protein kinase - Non-receptor protein-serine/threonine	Protein-serine/threonine kinase	CAMK	CAMK2
326	164	NK018-3	CaMK2b	Pan-specific	Calcium/calmodulin-dependent protein-serine kinase 2 beta	0	2997	12	1105	3298.43	5795.82				0	4130	14	906	3729.1	6515.53							0	3960	18	1057	4166.69	7128.55								CAMK2b	X	PSTK	Protein kinase - Non-receptor protein-serine/threonine	Protein-serine/threonine kinase	CAMK	CAMK2
327	165	NK019-3	CaMK2d	Pan-specific	Calcium/calmodulin-dependent protein-serine kinase 2 delta	0	9056	22	882	7967.99	14000.9	13158.3	842.65	6.40396	0	9730	21	925	8980.83	15691.4	15135.3	556.092	3.67413	10.0781	15.0253		0	8256	16	887	7308.88	12504.3	12820.4	316.027	2.46504	8.86899	-2.56807			CAMK2d	X	PSTK	Protein kinase - Non-receptor protein-serine/threonine	Protein-serine/threonine kinase	CAMK	CAMK2
328	165	NK019-3	CaMK2d	Pan-specific	Calcium/calmodulin-dependent protein-serine kinase 2 delta	0	8013	12	876	7008.88	12315.6				0	8996	14	929	8344.28	14579.2							0	7198	22	1070	7678.32	13136.4								CAMK2d	X	PSTK	Protein kinase - Non-receptor protein-serine/threonine	Protein-serine/threonine kinase	CAMK	CAMK2
329	166	NK020-1	CaMK2g	Pan-specific	Calcium/calmodulin-dependent protein-serine kinase 2 gamma	0	2210	14	869	1908.32	3353.21	3151.34	201.865	6.40567	0	2358	16	888	2079.7	3633.68	3493.02	140.654	4.02672	10.4324	10.8424		0	2600	16	749	1935.42	3311.19	3139.16	172.029	5.48008	11.8858	-0.386494			CaMK2g	X	PSTK	Protein kinase - Non-receptor protein-serine/threonine	Protein-serine/threonine kinase	CAMK	CAMK2
330	166	NK020-1	CaMK2g	Pan-specific	Calcium/calmodulin-dependent protein-serine kinase 2 gamma	0	2164	12	780	1678.56	2949.48				0	2694	18	717	1918.69	3352.37							0	2290	14	762	1734.31	2967.13								CaMK2g	X	PSTK	Protein kinase - Non-receptor protein-serine/threonine	Protein-serine/threonine kinase	CAMK	CAMK2
331	167	NK021-2 (NK021-3)	CaMK4 (CaMPK4)	Pan-specific	Calcium/calmodulin-dependent protein-serine kinase 4	0	2057	16	801	1634.84	2872.66	2705.41	167.25	6.18205	0	2048	16	689	1400.05	2446.19	2457.98	11.7989	0.480025	6.66208	-9.14547		0	1994	14	771	1526.58	2611.74	2466.76	144.973	5.87707	12.0591	-8.82097			CAMK4	X	PSTK	Protein kinase - Non-receptor protein-serine/threonine	Protein-serine/threonine kinase	CAMK	CAMK1
332	167	NK021-2 (NK021-3)	CaMK4 (CaMPK4)	Pan-specific	Calcium/calmodulin-dependent protein-serine kinase 4	0	2060	14	706	1444.48	2538.16				0	1984	18	719	1413.55	2469.78							0	1747	16	784	1357.1	2321.79								CAMK4	X	PSTK	Protein kinase - Non-receptor protein-serine/threonine	Protein-serine/threonine kinase	CAMK	CAMK1
333	168	NK021 SG-KAP-CA003	CaMK4 (CaMPK4)	Pan-specific	Calcium/calmodulin-dependent protein-serine kinase 4	0	2399	20	856	2036.42	3578.3	3334	244.296	7.32742	0	2265	28	838	1874.61	3275.34	3256.11	19.2316	0.590631	7.91805	-2.33628		0	3030	28	683	2050.37	3507.85	3412.53	95.3247	2.79338	10.1208	2.35532			CAMK4	X	PSTK	Protein kinase - Non-receptor protein-serine/threonine	Protein-serine/threonine kinase	CAMK	CAMK1
334	168	NK021 SG-KAP-CA003	CaMK4 (CaMPK4)	Pan-specific	Calcium/calmodulin-dependent protein-serine kinase 4	0	2233	24	796	1758.36	3089.7				0	2385	22	784	1852.59	3236.88							0	2660	22	735	1938.93	3317.2								CAMK4	X	PSTK	Protein kinase - Non-receptor protein-serine/threonine	Protein-serine/threonine kinase	CAMK	CAMK1
335	169	PK556	CaMK4 (CaMPK4)	T200	Calcium/calmodulin-dependent protein-serine kinase 4	0	9042	18	1109	10007.6	17584.9	16653.8	931.086	5.59084	0	9495	20	1022	9683.45	16919.1	17208.6	289.557	1.68263	7.27347	3.33175		0	9274	19	1118	10347.1	17702.2	16398.9	1303.32	7.94758	13.5384	-1.5303			CAMK4	X	PSTK	Protein kinase - Non-receptor protein-serine/threonine	Protein-serine/threonine kinase	CAMK	CAMK1
336	169	PK556	CaMK4 (CaMPK4)	T200	Calcium/calmodulin-dependent protein-serine kinase 4	0	8680	18	1033	8947.85	15722.7				0	9557	19	1050	10014.9	17498.2							0	8696	20	1017	8823.49	15095.6								CAMK4	X	PSTK	Protein kinase - Non-receptor protein-serine/threonine	Protein-serine/threonine kinase	CAMK	CAMK1
337	170	NK022	CaMKK1 (CaMKK)	Pan-specific	Calcium/calmodulin-dependent protein-serine kinase kinase	0	5711	28	858	4876.01	8567.87	8705.48	137.603	1.58065	0	6522	28	720	4675.68	8169.42	8103.3	66.1234	0.816006	2.39666	-6.91726		0	6480	26	613	3956.3	6768.61	6577.76	190.848	2.90141	4.48206	-24.4412			CaMKK1	X	PSTK	Protein kinase - Non-receptor protein-serine/threonine	Protein-serine/threonine kinase	Other	CAMKK	Meta
338	170	NK022	CaMKK1 (CaMKK)	Pan-specific	Calcium/calmodulin-dependent protein-serine kinase kinase	0	6451	40	785	5032.64	8843.08				0	5721	42	810	4599.99	8037.17							0	6566	28	571	3733.2	6386.91								CaMKK1	X	PSTK	Protein kinase - Non-receptor protein-serine/threonine	Protein-serine/threonine kinase	Other	CAMKK	Meta
339	171	PK557	CaMKK1 (CaMKK)	S74	Calcium/calmodulin-dependent protein-serine kinase kinase	0	920	12	560	508.48	893.474	875.897	17.5767	2.00671	0	622	16	514	311.484	544.23	748.783	204.553	27.3181	29.3248	-14.5125		0	1077	10	503	536.701	918.21	1056.06	137.851	13.0533	15.06	20.5691			CaMKK1	X	PSTK	Protein kinase - Non-receptor protein-serine/threonine	Protein-serine/threonine kinase	Other	CAMKK	Meta
340	171	PK557	CaMKK1 (CaMKK)	S74	Calcium/calmodulin-dependent protein-serine kinase kinase	0	592	18	851	488.474	858.321				0	958	14	578	545.632	953.336							0	1209	12	583	697.851	1193.91								CaMKK1	X	PSTK	Protein kinase - Non-receptor protein-serine/threonine	Protein-serine/threonine kinase	Other	CAMKK	Meta
341	172	NK366-1	CaMKKb (CaMKK2)	Pan-specific	Calcium/calmodulin-dependent protein kinase kinase 2	0	100	12	436	38.368	67.4182	67.868	0.44983	0.6628	0	119	10	425	46.325	80.9397	79.4502	1.4895	1.87476	2.53756	17.0658		0	50	12	654	24.852	42.5178	63.9256	21.4078	33.4886	34.1514	-5.809				X	PSTK	Protein kinase - Non-receptor protein-serine/threonine	Protein-serine/threonine kinase	Other	CAMKK	Meta
342	172	NK366-1	CaMKKb (CaMKK2)	Pan-specific	Calcium/calmodulin-dependent protein kinase kinase 2	0	88	8	486	38.88	68.3179				0	102	10	485	44.62	77.9607							0	114	12	489	49.878	85.3333									X	PSTK	Protein kinase - Non-receptor protein-serine/threonine	Protein-serine/threonine kinase	Other	CAMKK	Meta
343	173	PN505	Cas-L	Y166	Enhancer of filamentation 1	0	4086	14	968	3941.7	6926.14	6150	776.137	12.6201	0	4368	14	739	3217.61	5621.85	5429.09	192.762	3.55055	16.1707	-11.7222		0	4457	18	740	3284.86	5619.87	5748.72	128.85	2.24137	14.8615	-6.52483
344	173	PN505	Cas-L	Y166	Enhancer of filamentation 1	0	4244	14	723	3058.29	5373.86				0	4269	18	705	2996.95	5236.33							0	4398	16	784	3435.49	5877.58
345	174	NK023-1	CASK (/Lin2)	Pan-specific	Calcium/calmodulin-dependent protein-serine kinase (Lin2 homolog)	0	450	20	591	254.13	446.544	464.393	17.8491	3.84353	0	338	12	551	179.626	313.845	365.317	51.4721	14.0897	17.9332	-21.3344		0	456	12	570	253.08	432.98	524.106	91.1263	17.387	21.2305	12.8583				X	PSTK	Protein kinase - Non-receptor protein-serine/threonine	Protein-serine/threonine kinase	CAMK	CASK
346	174	NK023-1	CASK (/Lin2)	Pan-specific	Calcium/calmodulin-dependent protein-serine kinase (Lin2 homolog)	0	488	14	579	274.446	482.242				0	419	14	589	238.545	416.789							0	586	17	632	359.608	615.232									X	PSTK	Protein kinase - Non-receptor protein-serine/threonine	Protein-serine/threonine kinase	CAMK	CASK
347	181	NN147-2	Caveolin 1	Pan-specific	Caveolin 1	0	178	12	491	81.506	143.218	172.509	29.2908	16.9793	0	276	17	553	143.227	250.248	198.703	51.5455	25.941	42.9203	15.1842		0	230	10	454	99.88	170.879	190.266	19.3873	10.1895	27.1688	10.2936
348	181	NN147-2	Caveolin 1	Pan-specific	Caveolin 1	0	235	12	515	114.845	201.8				0	140	12	658	84.224	147.157							0	234	12	552	122.544	209.653
349	182	PN147	Caveolin 1	Y14	Caveolin 1	0	14	2	771	9.252	16.2571	13.5195	2.73763	20.2495	0	10	2	770	6.16	10.7628	11.4617	0.698886	6.09756	26.3471	-15.2207		0	14	4	716	7.16	12.2496	11.3737	0.875951	7.70156	27.9511	-15.872
350	182	PN147	Caveolin 1	Y14	Caveolin 1	0	12	4	767	6.136	10.7819				0	16	6	696	6.96	12.1606							0	14	6	767	6.136	10.4977
351	183	PN217	Caveolin 1	Y14	Caveolin 1	0	360	18	608	207.936	365.374	385.855	20.4813	5.30803	0	366	18	563	195.924	342.321	333.472	8.84964	2.65379	7.96182	-13.576		0	394	14	580	220.4	377.069	408.688	31.6181	7.73649	13.0445	5.91727
352	183	PN217	Caveolin 1	Y14	Caveolin 1	0	406	18	596	231.248	406.337				0	338	16	577	185.794	324.622							0	450	16	593	257.362	440.306
353	184	NN022-1	Caveolin 2	Pan-specific	Caveolin 2	0	942	10	348	324.336	569.906	416.349	153.557	36.8818	0	2787	12	312	865.8	1512.74	993.236	519.503	52.3041	89.1859	138.559	Possible	0	828	10	316	258.488	442.232	365.153	77.0794	21.1088	57.9906	-12.2965
354	184	NN022-1	Caveolin 2	Pan-specific	Caveolin 2	0	422	10	363	149.556	262.792				0	928	12	296	271.136	473.733							0	485	8	353	168.381	288.073
355	185	PN018	Caveolin 2	S36	Caveolin 2	0	98	10	350	30.8	54.1201	45.5031	8.61705	18.9373	0	174	12	319	51.678	90.2926	60.1147	30.1779	50.2005	69.1378	32.1113		0	110	10	350	35	59.8794	45.7239	14.1555	30.9586	49.8959	0.485398
356	185	PN018	Caveolin 2	S36	Caveolin 2	0	40	8	656	20.992	36.886				0	32	6	659	17.134	29.9368							0	36	8	659	18.452	31.5684
357	186	NN171-2	Cbl	Pan-specific	E3 ubiquitin-protein ligase CBL	0	946	16	579	538.47	946.171	883.555	62.6159	7.08682	0	873	14	556	477.604	834.477	845.963	11.4862	1.35777	8.44458	-4.25461		0	1013	14	586	585.414	1001.55	995.058	6.49264	0.652489	7.73931	12.6198						Ubiquitin protein ligase
358	186	NN171-2	Cbl	Pan-specific	E3 ubiquitin-protein ligase CBL	0	812	12	584	467.2	820.939				0	880	16	568	490.752	857.449							0	940	14	624	577.824	988.565											Ubiquitin protein ligase
359	187	PN743	Cbl	Y674	E3 ubiquitin-protein ligase CBL	0	6424	18	696	4458.58	7834.37	8463.87	629.494	7.43743	0	6014	16	721	4324.56	7555.93	8261.17	705.234	8.53673	15.9742	-2.39489		0	5814	14	690	4002	6846.79	8034.58	1187.8	14.7835	22.221	-5.07196						Ubiquitin protein ligase
360	187	PN743	Cbl	Y674	E3 ubiquitin-protein ligase CBL	0	7264	16	714	5175.07	9093.36				0	7770	18	662	5131.82	8966.4							0	7589	18	712	5390.55	9222.38											Ubiquitin protein ligase
361	188	PN171	Cbl	Y700	E3 ubiquitin-protein ligase CBL	0	1332	16	392	515.872	906.463	547.32	359.143	65.6186	0	2848	16	355	1005.36	1756.58	1398.68	357.9	25.5884	91.2069	155.551	Possible	0	1385	20	456	622.44	1064.9	955.84	109.056	11.4094	77.028	74.6402						Ubiquitin protein ligase
362	188	PN171	Cbl	Y700	E3 ubiquitin-protein ligase CBL	0	178	14	653	107.092	188.176				0	1474	14	408	595.68	1040.78							0	996	12	503	494.952	846.784											Ubiquitin protein ligase
363	189	PN218	Cbl	Y700	E3 ubiquitin-protein ligase CBL	0	226	10	548	118.368	207.99	194.847	13.1435	6.74555	0	163	12	553	83.503	145.898	162.177	16.2797	10.0382	16.7837	-16.7666		0	192	10	521	94.822	162.225	172.617	10.3917	6.02006	12.7656	-11.4087						Ubiquitin protein ligase
364	189	PN218	Cbl	Y700	E3 ubiquitin-protein ligase CBL	0	194	10	562	103.408	181.703				0	182	8	587	102.138	178.457							0	198	8	563	106.97	183.009											Ubiquitin protein ligase
365	190	PN744	CBS	S227	Cystathionine beta-synthase	0	1868	14	643	1192.12	2094.73	1900.88	193.85	10.1979	0	1774	10	663	1169.53	2043.42	1733.86	309.561	17.8538	28.0517	-8.78646		0	1860	14	629	1161.13	1986.52	1869.35	117.167	6.2678	16.4657	-1.65892
366	190	PN744	CBS	S227	Cystathionine beta-synthase	0	1504	14	652	971.48	1707.03				0	1346	14	612	815.184	1424.3							0	1578	12	654	1024.16	1752.18
367	191	NP001	CD45 (PTPRC; Receptor-type tyrosine-protein phosphatase C)	Pan-specific	Receptor protein-tyrosine phosphatase CD45	0	328	12	317	100.172	176.017	147.58	28.4368	19.2687	0	560	12	335	183.58	320.754	196.873	123.881	62.9244	82.1931	33.4005		0	337	14	380	122.74	209.989	185.832	24.1571	12.9994	32.2682	25.9191					PYP	Protein phosphatase - Receptor protein-tyrosine phosphatase
368	191	NP001	CD45 (PTPRC; Receptor-type tyrosine-protein phosphatase C)	Pan-specific	Receptor protein-tyrosine phosphatase CD45	1	203	12	355	67.805	119.143				1	124	12	373	41.776	72.9917							1	327	12	300	94.5	161.675										PYP	Protein phosphatase - Receptor protein-tyrosine phosphatase
369	192	PP527	CD45 (PTPRC; Receptor-type tyrosine-protein phosphatase C)	Y1216		0	9241	16	716	6605.1	11606.1	11754.6	148.518	1.26348	0	9720	16	740	7180.96	12546.7	11695.1	851.558	7.28131	8.54478	-0.506389		0	4460	12	943	4194.46	7176.06	9528.19	2352.13	24.686	25.9495	-18.9411					PYP	Protein phosphatase - Receptor protein-tyrosine phosphatase
370	192	PP527	CD45 (PTPRC; Receptor-type tyrosine-protein phosphatase C)	Y1216		0	9586	18	708	6774.14	11903.2				0	9564	16	650	6206.2	10843.6							0	9767	14	712	6944.14	11880.3										PYP	Protein phosphatase - Receptor protein-tyrosine phosphatase
371	193	NK024	CDC2L5 (CHED, CDK13)	Pan-specific	Cholinesterase-related cell division controller	0	222	16	606	124.836	219.355	224.179	4.82337	2.15157	0	282	16	717	190.722	333.232	298.108	35.1243	11.7824	13.934	32.978		0	326	12	654	205.356	351.332	325.826	25.5052	7.82786	9.97943	45.3423			CHED	X	PSTK	Protein kinase - Non-receptor protein-serine/threonine	Protein-serine/threonine kinase	CMGC	CDK	CRK7	X
372	193	NK024	CDC2L5 (CHED, CDK13)	Pan-specific	Cholinesterase-related cell division controller	0	226	12	609	130.326	229.002				0	238	12	666	150.516	262.984							0	274	12	670	175.54	300.321								CHED	X	PSTK	Protein kinase - Non-receptor protein-serine/threonine	Protein-serine/threonine kinase	CMGC	CDK	CRK7	X
373	194	NK024-2	CDC2L5 (CHED, CDK13)	Pan-specific	CDC2-related protein kinase 5	0	1150	20	698	788.74	1385.93	1321.01	64.9178	4.91424	0	1196	20	809	951.384	1662.27	1346.48	315.788	23.4528	28.367	1.92807		0	1408	14	768	1070.59	1831.61	1689.12	142.489	8.43568	13.3499	27.8657			CHED	X	PSTK	Protein kinase - Non-receptor protein-serine/threonine	Protein-serine/threonine kinase	CMGC	CDK	CRK7
374	194	NK024-2	CDC2L5 (CHED, CDK13)	Pan-specific	CDC2-related protein kinase 5	0	1000	14	725	714.85	1256.1				0	920	18	654	589.908	1030.7							0	1240	20	741	904.02	1546.63								CHED	X	PSTK	Protein kinase - Non-receptor protein-serine/threonine	Protein-serine/threonine kinase	CMGC	CDK	CRK7
375	195	PN576	CDC5L	T385	Cell division cycle 5-like protein	0	13352	20	939	12518.7	21997.3	22230.4	233.082	1.04849	0	13654	20	1004	13688.5	23916.8	21369.4	2547.43	11.9209	12.9694	-3.87296		0	12924	20	1012	13058.8	22341.6	21634.9	706.755	3.26674	4.31523	-2.67876						Transcription protein; RNA processing					X
376	195	PN576	CDC5L	T385	Cell division cycle 5-like protein	0	13258	24	966	12784	22463.4				0	12814	20	842	10772.5	18822							0	12062	22	1016	12232.6	20928.1											Transcription protein; RNA processing					X
377	196	PK558	CDC7	T376	Cell division cycle 7-related protein kinase	0	7705	18	760	5842.12	10265.5	9990.61	274.849	2.75108	0	8387	16	707	5918.3	10340.5	10358.4	17.8452	0.172278	2.92335	3.68115		0	7877	12	670	5269.55	9015.36	9366.54	351.176	3.74926	6.50034	-6.2466			CDC7	X	PSTK	Protein kinase - Non-receptor protein-serine/threonine	Protein-serine/threonine kinase	Other	CDC7
378	196	PK558	CDC7	T376	Cell division cycle 7-related protein kinase	0	7580	16	731	5529.28	9715.76				0	7618	14	781	5938.72	10376.2							0	7905	16	720	5680.08	9717.72								CDC7	X	PSTK	Protein kinase - Non-receptor protein-serine/threonine	Protein-serine/threonine kinase	Other	CDC7
379	197	NK025-6	CDK1 (CDC2)	Pan-specific	Cyclin-dependent protein-serine kinase 1; Cell division control protein 2 homologue	0	208	14	542	105.148	184.76	166.887	17.8737	10.7101	0	180	10	515	87.55	152.969	168.283	15.3143	9.10035	19.8104	0.836641		0	174	10	492	80.688	138.044	163.662	25.6173	15.6526	26.3627	-1.93253			CDK1	X	PSTK	Protein kinase - Non-receptor protein-serine/threonine	Protein-serine/threonine kinase	CMGC	CDK	CDC2
380	197	NK025-6	CDK1 (CDC2)	Pan-specific	Cyclin-dependent protein-serine kinase 1; Cell division control protein 2 homologue	0	158	10	573	84.804	149.013				0	195	10	568	105.08	183.597							0	213	10	545	110.635	189.279								CDK1	X	PSTK	Protein kinase - Non-receptor protein-serine/threonine	Protein-serine/threonine kinase	CMGC	CDK	CDC2
381	198	NK025-1	CDK1 (CDC2)	Pan-specific	Cyclin-dependent protein-serine kinase 1; Cell division control protein 2 homologue	0	201	12	481	90.909	159.74	155.305	4.43592	2.85627	0	180	12	444	74.592	130.328	117.125	13.2037	11.2732	14.1295	-24.5839		0	202	8	470	91.18	155.995	162.148	6.1539	3.79522	6.65149	4.40674			CDK1	X	PSTK	Protein kinase - Non-receptor protein-serine/threonine	Protein-serine/threonine kinase	CMGC	CDK	CDC2
382	198	NK025-1	CDK1 (CDC2)	Pan-specific	Cyclin-dependent protein-serine kinase 1; Cell division control protein 2 homologue	0	190	10	477	85.86	150.869				0	148	10	431	59.478	103.921							0	214	12	487	98.374	168.302								CDK1	X	PSTK	Protein kinase - Non-receptor protein-serine/threonine	Protein-serine/threonine kinase	CMGC	CDK	CDC2
383	199	NK204	CDK1 (CDC2)	Pan-specific	Cyclin-dependent protein-serine kinase 1; Cell division control protein 2 homologue	0	10	2	353	2.824	4.96218	6.47684	1.51466	23.3858	0	8	2	362	2.172	3.79495	7.0902	3.29525	46.4761	69.8619	9.46998		0	8	2	423	2.538	4.34212	5.79462	1.4525	25.0664	48.4522	-10.5333			CDK1	X	PSTK	Protein kinase - Non-receptor protein-serine/threonine	Protein-serine/threonine kinase	CMGC	CDK	CDC2
384	199	NK204	CDK1 (CDC2)	Pan-specific	Cyclin-dependent protein-serine kinase 1; Cell division control protein 2 homologue	0	8	2	758	4.548	7.9915				0	10	2	743	5.944	10.3854							0	8	2	706	4.236	7.24712								CDK1	X	PSTK	Protein kinase - Non-receptor protein-serine/threonine	Protein-serine/threonine kinase	CMGC	CDK	CDC2
385	200	PK559	CDK1 (CDC2)	T14	Cyclin-dependent protein-serine kinase 1; Cell division control protein 2 homologue	0	8851	18	742	6554.09	11516.5	11298.6	217.918	1.92872	0	8432	14	659	5547.46	9692.61	9645.18	47.4264	0.491711	2.42043	-14.6336		0	8357	18	701	5845.64	10001	10409.4	408.427	3.92364	5.85236	-7.8699			CDK1	X	PSTK	Protein kinase - Non-receptor protein-serine/threonine	Protein-serine/threonine kinase	CMGC	CDK	CDC2
386	200	PK559	CDK1 (CDC2)	T14	Cyclin-dependent protein-serine kinase 1; Cell division control protein 2 homologue	0	8712	14	725	6306.05	11080.7				0	8694	16	633	5493.17	9597.76							0	8490	14	746	6323.1	10817.8								CDK1	X	PSTK	Protein kinase - Non-receptor protein-serine/threonine	Protein-serine/threonine kinase	CMGC	CDK	CDC2
387	201	PK560	CDK1 (CDC2)	T14+Y15	Cyclin-dependent protein-serine kinase 1; Cell division control protein 2 homologue	0	9788	18	763	7454.51	13098.7	12642.2	456.456	3.61057	0	9890	16	732	7227.77	12628.5	12243	385.453	3.14835	6.75892	-3.15768		0	10550	20	698	7349.94	12574.6	12504.5	70.1051	0.56064	4.17121	-1.0895			CDK1	X	PSTK	Protein kinase - Non-receptor protein-serine/threonine	Protein-serine/threonine kinase	CMGC	CDK	CDC2
388	201	PK560	CDK1 (CDC2)	T14+Y15	Cyclin-dependent protein-serine kinase 1; Cell division control protein 2 homologue	0	9492	18	732	6934.97	12185.8				0	9584	12	709	6786.55	11857.6							0	10027	16	726	7267.99	12434.4								CDK1	X	PSTK	Protein kinase - Non-receptor protein-serine/threonine	Protein-serine/threonine kinase	CMGC	CDK	CDC2
389	202	PK007-1	CDK1 (CDC2)	Y15	Cyclin-dependent protein-serine kinase 1; Cell division control protein 2 homologue	0	543	10	385	205.205	360.575	318.062	42.5133	13.3664	0	188	8	319	57.42	100.325	211.067	110.742	52.4677	65.834	-33.6396		0	466	10	413	188.328	322.199	287.991	34.2083	11.8782	25.2446	-9.45444			CDK1	X	PSTK	Protein kinase - Non-receptor protein-serine/threonine	Protein-serine/threonine kinase	CMGC	CDK	CDC2
390	202	PK007-1	CDK1 (CDC2)	Y15	Cyclin-dependent protein-serine kinase 1; Cell division control protein 2 homologue	0	410	14	396	156.816	275.549				0	516	10	364	184.184	321.809							0	381	12	402	148.338	253.783								CDK1	X	PSTK	Protein kinase - Non-receptor protein-serine/threonine	Protein-serine/threonine kinase	CMGC	CDK	CDC2
391	203	PK008-1	CDK1 (CDC2)	T161	Cyclin-dependent protein-serine kinase 1; Cell division control protein 2 homologue	0	2552	10	370	940.54	1652.67	1371.53	281.142	20.4985	0	3593	12	323	1156.66	2020.94	1621.29	399.65	24.6501	45.1486	18.2107		0	2356	14	375	878.25	1502.55	1317.99	184.553	14.0026	34.501	-3.90306			CDK1	X	PSTK	Protein kinase - Non-receptor protein-serine/threonine	Protein-serine/threonine kinase	CMGC	CDK	CDC2
392	203	PK008-1	CDK1 (CDC2)	T161	Cyclin-dependent protein-serine kinase 1; Cell division control protein 2 homologue	0	1658	12	377	620.542	1090.38				0	2004	12	351	699.192	1221.64							0	1537	14	435	662.505	1133.44								CDK1	X	PSTK	Protein kinase - Non-receptor protein-serine/threonine	Protein-serine/threonine kinase	CMGC	CDK	CDC2
393	204	PK561	CDK1 (CDC2)	T161	Cyclin-dependent protein-serine kinase 1; Cell division control protein 2 homologue	0	16316	29	903	14707.2	25842.6	25709.3	133.367	0.518752	0	15768	24	815	12831.4	22419.1	22764.6	345.417	1.51735	2.0361	-11.4539		0	14420	26	886	12753.1	21818.5	22845.1	1026.64	4.49392	5.01268	-11.1404			CDK1	X	PSTK	Protein kinase - Non-receptor protein-serine/threonine	Protein-serine/threonine kinase	CMGC	CDK	CDC2
394	204	PK561	CDK1 (CDC2)	T161	Cyclin-dependent protein-serine kinase 1; Cell division control protein 2 homologue	0	16587	28	879	14555.4	25575.9				0	15644	28	847	13226.8	23110							0	15902	28	879	13953.2	23871.8								CDK1	X	PSTK	Protein kinase - Non-receptor protein-serine/threonine	Protein-serine/threonine kinase	CMGC	CDK	CDC2
395	205	NK026-6	CDK2	Pan-specific	Cyclin-dependent protein-serine kinase 2	0	424	14	623	255.43	448.828	525.363	76.5352	14.568	0	406	14	551	215.992	377.384	355.957	21.4278	6.01979	20.5878	-32.2456		0	484	14	645	303.15	518.642	542.025	23.3838	4.31415	18.8822	3.17155			CDK2	X	PSTK	Protein kinase - Non-receptor protein-serine/threonine	Protein-serine/threonine kinase	CMGC	CDK	CDC2
396	205	NK026-6	CDK2	Pan-specific	Cyclin-dependent protein-serine kinase 2	0	523	20	681	342.543	601.898				0	376	12	526	191.464	334.529							0	506	12	669	330.486	565.409								CDK2	X	PSTK	Protein kinase - Non-receptor protein-serine/threonine	Protein-serine/threonine kinase	CMGC	CDK	CDC2
397	206	NK026-3	CDK2	Pan-specific	Cyclin-dependent protein-serine kinase 2	0	715	14	399	279.699	491.472	412.182	79.2904	19.2367	0	872	16	351	300.456	524.961	357.37	167.591	46.8957	66.1324	-13.2979		0	710	16	382	265.108	453.558	403.871	49.6863	12.3025	31.5392	-2.01619			CDK2	X	PSTK	Protein kinase - Non-receptor protein-serine/threonine	Protein-serine/threonine kinase	CMGC	CDK	CDC2
398	206	NK026-3	CDK2	Pan-specific	Cyclin-dependent protein-serine kinase 2	0	466	16	421	189.45	332.891				0	272	14	421	108.618	189.779							0	468	14	456	207.024	354.185								CDK2	X	PSTK	Protein kinase - Non-receptor protein-serine/threonine	Protein-serine/threonine kinase	CMGC	CDK	CDC2
399	207	PK568	CDK2	T160	Cyclin-dependent protein-serine kinase 2	0	4500	24	987	4417.81	7762.74	7807.84	45.0919	0.577521	0	4699	20	907	4243.85	7414.92	7198.23	216.69	3.01033	3.58785	-7.80758		0	5218	32	1009	5232.67	8952.28	8809.69	142.583	1.61848	2.196	12.8314			CDK2	X	PSTK	Protein kinase - Non-receptor protein-serine/threonine	Protein-serine/threonine kinase	CMGC	CDK	CDC2
400	207	PK568	CDK2	T160	Cyclin-dependent protein-serine kinase 2	0	4550	22	987	4469.14	7852.93				0	4370	22	919	3995.81	6981.54							0	5142	30	991	5065.99	8667.11								CDK2	X	PSTK	Protein kinase - Non-receptor protein-serine/threonine	Protein-serine/threonine kinase	CMGC	CDK	CDC2
401	208	NK027-2	CDK4	Pan-specific	Cyclin-dependent protein-serine kinase 4	0	146	18	627	80.256	141.022	126.683	14.3383	11.3182	0	170	18	562	85.424	149.254	126.456	22.7977	18.0281	29.3463	-0.179045		0	164	22	633	89.886	153.781	135.524	18.2564	13.4709	24.7892	6.97885			CDK4	X	PSTK	Protein kinase - Non-receptor protein-serine/threonine	Protein-serine/threonine kinase	CMGC	CDK	CDK4
402	208	NK027-2	CDK4	Pan-specific	Cyclin-dependent protein-serine kinase 4	0	114	18	666	63.936	112.345				0	110	14	618	59.328	103.659							0	120	18	672	68.544	117.268								CDK4	X	PSTK	Protein kinase - Non-receptor protein-serine/threonine	Protein-serine/threonine kinase	CMGC	CDK	CDK4
403	209	PK569	CDK4	T172	Cyclin-dependent protein-serine kinase 4	0	13620	20	792	10771.2	18926.6	18671.2	255.408	1.36793	0	14844	18	656	9725.86	16993.2	17958.4	965.2	5.37466	6.74258	-3.8177		0	14146	16	708	10004	17115.3	17812.5	697.171	3.91394	5.28187	-4.59894			CDK4	X	PSTK	Protein kinase - Non-receptor protein-serine/threonine	Protein-serine/threonine kinase	CMGC	CDK	CDK4
404	209	PK569	CDK4	T172	Cyclin-dependent protein-serine kinase 4	0	13796	24	761	10480.5	18415.8				0	13872	22	782	10830.7	18923.6							0	13652	26	794	10819	18509.7								CDK4	X	PSTK	Protein kinase - Non-receptor protein-serine/threonine	Protein-serine/threonine kinase	CMGC	CDK	CDK4
405	210	NK028-4	CDK5	Pan-specific	Cyclin-dependent protein-serine kinase 5	0	311	12	653	195.247	343.078	295.467	47.6108	16.1137	0	332	12	520	166.4	290.737	264.825	25.9112	9.78426	25.898	-10.3705		0	352	14	652	220.376	377.028	322.973	54.0557	16.7369	32.8507	9.30925			CDK5	X	PSTK	Protein kinase - Non-receptor protein-serine/threonine	Protein-serine/threonine kinase	CMGC	CDK	CDK5
406	210	NK028-4	CDK5	Pan-specific	Cyclin-dependent protein-serine kinase 5	0	244	12	608	141.056	247.856				0	226	14	645	136.74	238.914							0	270	14	614	157.184	268.917								CDK5	X	PSTK	Protein kinase - Non-receptor protein-serine/threonine	Protein-serine/threonine kinase	CMGC	CDK	CDK5
407	211	NK028-5	CDK5	Pan-specific	Cyclin-dependent protein-serine kinase 5	0	338	12	656	213.856	375.776	323.891	51.885	16.0193	0	225	16	564	117.876	205.955	221.325	15.3703	6.94465	22.9639	-31.6669		0	296	10	567	162.162	277.433	299.837	22.4035	7.47188	23.4912	-7.4267			CDK5	X	PSTK	Protein kinase - Non-receptor protein-serine/threonine	Protein-serine/threonine kinase	CMGC	CDK	CDK5
408	211	NK028-5	CDK5	Pan-specific	Cyclin-dependent protein-serine kinase 5	0	186	14	900	154.8	272.006				0	202	12	713	135.47	236.695							0	304	16	654	188.352	322.24								CDK5	X	PSTK	Protein kinase - Non-receptor protein-serine/threonine	Protein-serine/threonine kinase	CMGC	CDK	CDK5
409	212	PK570	CDK5	Y15	Cyclin-dependent protein-serine kinase 5	0	6238	18	682	4242.04	7453.89	8031.31	577.418	7.18959	0	6042	20	604	3637.29	6355.12	7773.36	1418.23	18.2448	25.4344	-3.21177		0	6254	14	692	4318.08	7387.55	6969.74	417.811	5.99464	13.1842	-13.2178			CDK5	X	PSTK	Protein kinase - Non-receptor protein-serine/threonine	Protein-serine/threonine kinase	CMGC	CDK	CDK5
410	212	PK570	CDK5	Y15	Cyclin-dependent protein-serine kinase 5	0	7035	16	698	4899.26	8608.72				0	7480	18	705	5260.71	9191.59							0	6365	14	603	3829.65	6551.93								CDK5	X	PSTK	Protein kinase - Non-receptor protein-serine/threonine	Protein-serine/threonine kinase	CMGC	CDK	CDK5
411	213	PK179	CDK5	S159	Cyclin-dependent protein-serine kinase 5	0	282	10	576	156.672	275.296	281.453	6.15704	2.18759	0	248	14	591	138.294	241.629	212.367	29.2624	13.7791	15.9667	-24.5461		0	320	14	560	171.36	293.17	279.851	13.3189	4.75928	6.94688	-0.569147			CDK5	X	PSTK	Protein kinase - Non-receptor protein-serine/threonine	Protein-serine/threonine kinase	CMGC	CDK	CDK5
412	213	PK179	CDK5	S159	Cyclin-dependent protein-serine kinase 5	0	262	14	660	163.68	287.61				0	136	14	859	104.798	183.105							0	284	14	577	155.79	266.532								CDK5	X	PSTK	Protein kinase - Non-receptor protein-serine/threonine	Protein-serine/threonine kinase	CMGC	CDK	CDK5
413	214	NK029-3	CDK6	Pan-specific	Cyclin-dependent protein-serine kinase 6	0	424	12	702	289.224	508.209	430.735	77.4744	17.9866	0	418	16	658	264.516	462.166	432.733	29.4336	6.80179	24.7884	0.463878		0	502	16	687	333.882	571.219	497.172	74.0469	14.8936	32.8802	15.4242			CDK6	X	PSTK	Protein kinase - Non-receptor protein-serine/threonine	Protein-serine/threonine kinase	CMGC	CDK	CDK4
414	214	NK029-3	CDK6	Pan-specific	Cyclin-dependent protein-serine kinase 6	0	318	12	657	201.042	353.26				0	356	12	671	230.824	403.299							0	372	12	687	247.32	423.125								CDK6	X	PSTK	Protein kinase - Non-receptor protein-serine/threonine	Protein-serine/threonine kinase	CMGC	CDK	CDK4
415	215	NK029-4	CDK6	Pan-specific	Cyclin-dependent protein-serine kinase 6	0	52	6	591	27.186	47.7698	42.3613	5.4085	12.7675	0	46	10	668	24.048	42.017	40.6123	1.40476	3.45896	16.2265	-4.12884		0	48	6	666	27.972	47.8557	50.7504	2.89474	5.70388	18.4714	19.8037			CDK6	X	PSTK	Protein kinase - Non-receptor protein-serine/threonine	Protein-serine/threonine kinase	CMGC	CDK	CDK4
416	215	NK029-4	CDK6	Pan-specific	Cyclin-dependent protein-serine kinase 6	0	38	8	701	21.03	36.9528				0	54	10	510	22.44	39.2075							0	60	8	603	31.356	53.6451								CDK6	X	PSTK	Protein kinase - Non-receptor protein-serine/threonine	Protein-serine/threonine kinase	CMGC	CDK	CDK4
417	216	PK571	CDK6	Y13	Cyclin-dependent protein-serine kinase 6	0	8346	15	793	6606.48	11608.6	11006.8	601.762	5.46719	0	7949	18	656	5202.74	9090.3	10040.9	950.628	9.46753	14.9347	-8.77523		0	7920	18	783	6187.27	10585.4	10617.1	31.6694	0.298287	5.76547	-3.54053			CDK6	X	PSTK	Protein kinase - Non-receptor protein-serine/threonine	Protein-serine/threonine kinase	CMGC	CDK	CDK4
418	216	PK571	CDK6	Y13	Cyclin-dependent protein-serine kinase 6	0	8154	20	728	5921.55	10405				0	8198	28	770	6290.9	10991.6							0	8312	24	751	6224.29	10648.8								CDK6	X	PSTK	Protein kinase - Non-receptor protein-serine/threonine	Protein-serine/threonine kinase	CMGC	CDK	CDK4
419	217	PK572	CDK6	Y24	Cyclin-dependent protein-serine kinase 6	0	3686	26	930	3403.8	5980.98	6101.18	120.206	1.97021	0	3915	30	899	3492.61	6102.35	5941.61	160.736	2.70526	4.67547	-2.61538		0	3986	42	956	3770.46	6450.67	6301.77	148.893	2.36271	4.33293	3.28772			CDK6	X	PSTK	Protein kinase - Non-receptor protein-serine/threonine	Protein-serine/threonine kinase	CMGC	CDK	CDK4
420	217	PK572	CDK6	Y24	Cyclin-dependent protein-serine kinase 6	0	3606	26	989	3540.62	6221.39				0	3456	38	968	3308.62	5780.88							0	3794	36	957	3596.41	6152.88								CDK6	X	PSTK	Protein kinase - Non-receptor protein-serine/threonine	Protein-serine/threonine kinase	CMGC	CDK	CDK4
421	218	NK030-2	CDK7	Pan-specific	Cyclin-dependent protein-serine kinase 7	0	1284	20	843	1065.55	1872.33	1782.95	89.3764	5.01282	0	1411	14	703	982.091	1715.92	1371.07	344.853	25.1521	30.1649	-23.1012		0	1509	20	902	1343.08	2297.79	2058.85	238.943	11.6056	16.6185	15.4741			CDK7	X	PSTK	Protein kinase - Non-receptor protein-serine/threonine	Protein-serine/threonine kinase	CMGC	CDK	CDK7
422	218	NK030-2	CDK7	Pan-specific	Cyclin-dependent protein-serine kinase 7	0	1115	16	877	963.823	1693.58				0	924	19	649	587.345	1026.22							0	1274	24	851	1063.75	1819.91								CDK7	X	PSTK	Protein kinase - Non-receptor protein-serine/threonine	Protein-serine/threonine kinase	CMGC	CDK	CDK7
423	219	NK030-1	CDK7	Pan-specific	Cyclin-dependent protein-serine kinase 7	0	852	14	681	570.678	1002.77	1025.15	22.3878	2.18385	0	822	18	614	493.656	862.523	750.773	111.75	14.8847	17.0685	-26.7648		0	1078	16	644	683.928	1170.09	1158.47	11.62	1.00305	3.1869	13.0048			CDK7	X	PSTK	Protein kinase - Non-receptor protein-serine/threonine	Protein-serine/threonine kinase	CMGC	CDK	CDK7
424	219	NK030-1	CDK7	Pan-specific	Cyclin-dependent protein-serine kinase 7	0	978	18	621	596.16	1047.54				0	712	18	527	365.738	639.023							0	1074	20	636	670.344	1146.85								CDK7	X	PSTK	Protein kinase - Non-receptor protein-serine/threonine	Protein-serine/threonine kinase	CMGC	CDK	CDK7
425	220	PK573	CDK7	T170	Cyclin-dependent protein-serine kinase 7	0	5006	20	867	4322.86	7595.9	7745.86	149.955	1.93594	0	5202	18	739	3830.98	6693.54	7020.1	326.558	4.65176	6.5877	-9.36967		0	5574	16	844	4690.95	8025.47	7966.04	59.4363	0.746122	2.68206	2.84255			CDK7	X	PSTK	Protein kinase - Non-receptor protein-serine/threonine	Protein-serine/threonine kinase	CMGC	CDK	CDK7
426	220	PK573	CDK7	T170	Cyclin-dependent protein-serine kinase 7	0	5102	36	887	4493.54	7895.81				0	5092	26	830	4204.78	7346.66							0	5623	28	826	4621.47	7906.6								CDK7	X	PSTK	Protein kinase - Non-receptor protein-serine/threonine	Protein-serine/threonine kinase	CMGC	CDK	CDK7
427	221	NK031-5	CDK8	Pan-specific	Cyclin-dependent protein-serine kinase 8	0	144	12	966	127.512	224.057	190.751	33.3067	17.4609	0	94	10	967	81.228	141.923	130.01	11.9125	9.16275	26.6236	-31.8428		0	158	8	963	144.45	247.131	226.509	20.6225	9.1045	26.5654	18.7459			CDK8	X	PSTK	Protein kinase - Non-receptor protein-serine/threonine	Protein-serine/threonine kinase	CMGC	CDK	CDK8
428	221	NK031-5	CDK8	Pan-specific	Cyclin-dependent protein-serine kinase 8	0	156	14	631	89.602	157.444				0	132	13	568	67.592	118.098							0	208	22	647	120.342	205.886								CDK8	X	PSTK	Protein kinase - Non-receptor protein-serine/threonine	Protein-serine/threonine kinase	CMGC	CDK	CDK8
429	222	NK031-4	CDK8	Pan-specific	Cyclin-dependent protein-serine kinase 8	0	4880	16	837	4071.17	7153.64	7231.19	77.5534	1.07248	0	4962	16	696	3442.42	6014.64	6050.85	36.2093	0.598416	1.6709	-16.3229		0	5128	16	732	3741.98	6401.94	6596.65	194.707	2.95161	4.0241	-8.77511			CDK8	X	PSTK	Protein kinase - Non-receptor protein-serine/threonine	Protein-serine/threonine kinase	CMGC	CDK	CDK8
430	222	NK031-4	CDK8	Pan-specific	Cyclin-dependent protein-serine kinase 8	0	4786	16	872	4159.44	7308.75				0	4588	16	762	3483.86	6087.06							0	4818	18	827	3969.6	6791.36								CDK8	X	PSTK	Protein kinase - Non-receptor protein-serine/threonine	Protein-serine/threonine kinase	CMGC	CDK	CDK8
431	223	NK032	CDK9	Pan-specific	Cyclin-dependent protein-serine kinase 9	0	842	14	719	595.332	1046.09	970.585	75.5011	7.77893	0	544	12	517	275.044	480.561	607.041	126.48	20.8355	28.6144	-37.4561		0	688	12	615	415.74	711.265	775.649	64.3841	8.30067	16.0796	-20.0843			CDK9	X	PSTK	Protein kinase - Non-receptor protein-serine/threonine	Protein-serine/threonine kinase	CMGC	CDK	CDK9
432	223	NK032	CDK9	Pan-specific	Cyclin-dependent protein-serine kinase 9	0	744	10	694	509.396	895.084				0	669	12	639	419.823	733.521							0	780	14	641	491.006	840.033								CDK9	X	PSTK	Protein kinase - Non-receptor protein-serine/threonine	Protein-serine/threonine kinase	CMGC	CDK	CDK9
433	224	PK575	CDK9	T186	Cyclin-dependent protein-serine kinase 9	0	7110	18	809	5737.43	10081.5	9712.14	369.359	3.80307	0	6552	22	706	4610.18	8054.98	8163.91	108.93	1.33429	5.13736	-15.9413		0	7166	18	741	5296.67	9061.76	9293.93	232.171	2.4981	6.30116	-4.30609			CDK9	X	PSTK	Protein kinase - Non-receptor protein-serine/threonine	Protein-serine/threonine kinase	CMGC	CDK	CDK9
434	224	PK575	CDK9	T186	Cyclin-dependent protein-serine kinase 9	0	6558	18	813	5317.02	9342.79				0	6456	14	735	4734.87	8272.84							0	6856	24	815	5568.08	9526.1								CDK9	X	PSTK	Protein kinase - Non-receptor protein-serine/threonine	Protein-serine/threonine kinase	CMGC	CDK	CDK9
435	225	PK574	CDK9	S347	Cyclin-dependent protein-serine kinase 9	0	7198	18	765	5492.7	9651.48	9707.58	56.0978	0.577876	0	6858	26	681	4652.59	8129.08	8566.15	437.069	5.10229	5.68016	-11.7581		0	7712	24	714	5489.23	9391.21	9124.33	266.876	2.92488	3.50276	-6.00818			CDK9	X	PSTK	Protein kinase - Non-receptor protein-serine/threonine	Protein-serine/threonine kinase	CMGC	CDK	CDK9
436	225	PK574	CDK9	S347	Cyclin-dependent protein-serine kinase 9	0	7029	22	793	5556.55	9763.68				0	6840	24	756	5152.9	9003.22							0	7403	28	702	5177.25	8857.45								CDK9	X	PSTK	Protein kinase - Non-receptor protein-serine/threonine	Protein-serine/threonine kinase	CMGC	CDK	CDK9
437	226	NK033-2	CDK10 (PISSLRE)	Pan-specific	Cyclin-dependent protein-serine kinase 10 [PISSLRE]	0	9507	22	845	8014.82	14083.2	12643.1	1440.1	11.3904	0	9940	20	757	7509.44	13120.6	13568.7	448.114	3.30255	14.6929	7.32094		0	11072	18	790	8732.66	14940.2	13640.1	1300.06	9.53115	20.9215	7.88578			CDK10	X	PSTK	Protein kinase - Non-receptor protein-serine/threonine	Protein-serine/threonine kinase	CMGC	CDK	CDK10
438	226	NK033-2	CDK10 (PISSLRE)	Pan-specific	Cyclin-dependent protein-serine kinase 10 [PISSLRE]	0	7506	14	851	6375.69	11203				0	9958	17	807	8022.39	14016.8							0	9422	18	767	7212.87	12340.1								CDK10	X	PSTK	Protein kinase - Non-receptor protein-serine/threonine	Protein-serine/threonine kinase	CMGC	CDK	CDK10
439	227	NK033-3	CDK10 (PISSLRE)	Pan-specific	Cyclin-dependent protein-serine kinase 10 [PISSLRE]	0	9385	14	876	8209	14424.4	14494.1	69.641	0.48048	0	9014	18	842	7574.63	13234.5	13913.7	679.198	4.8815	5.36198	-4.00401		0	10541	18	808	8502.58	14546.6	14284.7	261.9	1.83343	2.31391	-1.44459			CDK10	X	PSTK	Protein kinase - Non-receptor protein-serine/threonine	Protein-serine/threonine kinase	CMGC	CDK	CDK10
440	227	NK033-3	CDK10 (PISSLRE)	Pan-specific	Cyclin-dependent protein-serine kinase 10 [PISSLRE]	0	9136	18	909	8288.26	14563.7				0	9174	16	912	8352.1	14592.9							0	9697	20	847	8196.42	14022.8								CDK10	X	PSTK	Protein kinase - Non-receptor protein-serine/threonine	Protein-serine/threonine kinase	CMGC	CDK	CDK10
441	228	PK564	CDK10 (PISSLRE)	T196	Cyclin-dependent protein-serine kinase 10 [PISSLRE]	0	6576	26	682	4467.1	7849.35	7719.01	130.336	1.68851	0	6056	20	605	3651.78	6380.45	7026.09	645.646	9.18926	10.8778	-8.97684		0	7440	20	687	5097.54	8721.08	8452.12	268.967	3.18224	4.87075	9.49734			CDK10	X	PSTK	Protein kinase - Non-receptor protein-serine/threonine	Protein-serine/threonine kinase	CMGC	CDK	CDK10
442	228	PK564	CDK10 (PISSLRE)	T196	Cyclin-dependent protein-serine kinase 10 [PISSLRE]	0	6268	18	691	4318.75	7588.68				0	6220	27	709	4390.84	7671.74							0	6656	22	721	4783.11	8183.15								CDK10	X	PSTK	Protein kinase - Non-receptor protein-serine/threonine	Protein-serine/threonine kinase	CMGC	CDK	CDK10
443	229	PK565	CDK11A (Cdc2L2; PITSLRE)	T583(labeledasT580)	Cell division cycle 2-like 2 protein kinase	0	7926	25	934	7379.53	12966.9	12841	125.924	0.980641	0	7906	20	833	6569.04	11477.5	11786.2	308.721	2.61933	3.59997	-8.21398		0	6752	30	910	6117.02	10465.3	11416.5	951.253	8.33227	9.31291	-11.0933			CDK11	X	PSTK	Protein kinase - Non-receptor protein-serine/threonine	Protein-serine/threonine kinase	CMGC	CDK	CDK8
444	229	PK565	CDK11A (Cdc2L2; PITSLRE)	T583(labeledasT580)	Cell division cycle 2-like 2 protein kinase	0	7912	38	919	7236.21	12715.1				0	8457	56	824	6922.42	12095							0	8178	28	887	7229.05	12367.8								CDK11	X	PSTK	Protein kinase - Non-receptor protein-serine/threonine	Protein-serine/threonine kinase	CMGC	CDK	CDK8
445	230	PK566	CDK12 (Cdc2L7)	S383+S385	Cell division protein kinase 12; Cell division cycle 2-related protein kinase 7	0	7522	30	1015	7604.38	13362	13250.9	111.133	0.83868	0	7851	22	908	7108.73	12420.5	12999.3	578.814	4.45266	5.29134	-1.89861		0	7362	78	982	7152.89	12237.5	12056.6	180.891	1.50035	2.33903	-9.01309			CRK7	X	PSTK	Protein kinase - Non-receptor protein-serine/threonine	Protein-serine/threonine kinase	CMGC	CDK	CRK7
446	230	PK566	CDK12 (Cdc2L7)	S383+S385	Cell division protein kinase 12; Cell division cycle 2-related protein kinase 7	0	7264	32	1034	7477.89	13139.7				0	7640	36	1022	7771.29	13578.1							0	6838	46	1022	6941.42	11875.7								CRK7	X	PSTK	Protein kinase - Non-receptor protein-serine/threonine	Protein-serine/threonine kinase	CMGC	CDK	CRK7
447	231	PK567	CDK12 (Cdc2L7)	T893	Cell division protein kinase 12; Cell division cycle 2-related protein kinase 7	0	7819	20	813	6340.59	11141.3	11801.5	660.172	5.59396	0	7866	22	831	6518.36	11389	11552.3	163.309	1.41365	7.0076	-2.11177		0	8816	28	881	7742.23	13245.7	12789.4	456.329	3.56803	9.16198	8.3708			CRK7	X	PSTK	Protein kinase - Non-receptor protein-serine/threonine	Protein-serine/threonine kinase	CMGC	CDK	CRK7
448	231	PK567	CDK12 (Cdc2L7)	T893	Cell division protein kinase 12; Cell division cycle 2-related protein kinase 7	0	7902	22	900	7092	12461.7				0	7751	26	868	6705.3	11715.6							0	8481	20	852	7208.77	12333.1								CRK7	X	PSTK	Protein kinase - Non-receptor protein-serine/threonine	Protein-serine/threonine kinase	CMGC	CDK	CRK7
449	232	NK199	CDKL1	Pan-specific	Cyclin-dependent kinase-like 1; Serine/threonine protein kinase KKIALRE	0	3536	18	737	2592.77	4555.87	4702.04	146.165	3.10854	0	3324	16	620	2050.96	3583.47	3690.28	106.807	2.89429	6.00283	-21.5175		0	3927	16	652	2549.97	4362.6	4624.61	262.009	5.66553	8.77407	-1.64672			CDKL1	X	PSTK	Protein kinase - Non-receptor protein-serine/threonine	Protein-serine/threonine kinase	CMGC	CDKL
450	232	NK199	CDKL1	Pan-specific	Cyclin-dependent kinase-like 1; Serine/threonine protein kinase KKIALRE	0	3618	16	766	2759.13	4848.2				0	3288	20	665	2173.22	3797.08							0	3922	20	732	2856.26	4886.61								CDKL1	X	PSTK	Protein kinase - Non-receptor protein-serine/threonine	Protein-serine/threonine kinase	CMGC	CDKL
451	233	NK261-1	CDKL2	Pan-specific	Cyclin-dependent kinase-like 2; Serine/threonine protein kinase KKIAMRE	0	10400	20	778	8075.64	14190.1	15017.9	827.813	5.51218	0	10142	22	681	6891.72	12041.3	11709.4	331.922	2.83466	8.34684	-22.0304		0	11038	20	801	8825.42	15098.9	14614.4	484.478	3.31507	8.82724	-2.6867			CDKL2	X	PSTK	Protein kinase - Non-receptor protein-serine/threonine	Protein-serine/threonine kinase	CMGC	CDKL
452	233	NK261-1	CDKL2	Pan-specific	Cyclin-dependent kinase-like 2; Serine/threonine protein kinase KKIAMRE	0	11006	22	821	9017.86	15845.7				0	9374	18	696	6511.78	11377.5							0	10790	22	767	8259.06	14129.9								CDKL2	X	PSTK	Protein kinase - Non-receptor protein-serine/threonine	Protein-serine/threonine kinase	CMGC	CDKL
453	234	NK262-1	CDKL3	Pan-specific	Cyclin-dependent kinase-like 3; Serine/threonine protein kinase NKIAMRE	0	9432	18	800	7531.2	13233.4	13220.6	12.8527	0.0972171	0	8684	12	693	6009.7	10500.2	10361.6	138.678	1.33839	1.43561	-21.6255		0	10333	20	765	7889.44	13497.6	12448.5	1049.04	8.42703	8.52425	-5.83958			CDKL3	X	PSTK	Protein kinase - Non-receptor protein-serine/threonine	Protein-serine/threonine kinase	CMGC	CDKL
454	234	NK262-1	CDKL3	Pan-specific	Cyclin-dependent kinase-like 3; Serine/threonine protein kinase NKIAMRE	0	9671	22	779	7516.57	13207.7				0	8042	16	729	5850.95	10222.9							0	8861	24	754	6663.1	11399.5								CDKL3	X	PSTK	Protein kinase - Non-receptor protein-serine/threonine	Protein-serine/threonine kinase	CMGC	CDKL
455	235	PK576	CDKL5 (STK9)	Y171	Cyclin-dependent kinase-like 5; Serine-threonine-protein kinase 9	0	8548	18	751	6406.03	11256.3	11236.4	19.9137	0.177225	0	7450	15	604	4490.74	7846.29	10465	2618.71	25.0235	25.2008	-6.86534		0	8304	16	744	6166.27	10549.5	10487.4	62.1617	0.59273	0.769955	-6.66645			CDKL5	X	PSTK	Protein kinase - Non-receptor protein-serine/threonine	Protein-serine/threonine kinase	CMGC	CDKL
456	235	PK576	CDKL5 (STK9)	Y171	Cyclin-dependent kinase-like 5; Serine-threonine-protein kinase 9	0	8484	18	754	6383.36	11216.5				0	8864	23	847	7488.33	13083.7							0	8686	18	703	6093.6	10425.2								CDKL5	X	PSTK	Protein kinase - Non-receptor protein-serine/threonine	Protein-serine/threonine kinase	CMGC	CDKL
457	255	PN019	CFL1	S3	Cofilin 1	0	436	10	300	127.8	224.563	201.095	23.4685	11.6703	0	558	10	262	143.576	250.858	246.63	4.22826	1.71442	13.3848	22.6435		0	426	14	413	170.156	291.11	232.582	58.5279	25.1644	36.8347	15.6578
458	255	PN019	CFL1	S3	Cofilin 1	0	334	10	312	101.088	177.626				0	472	8	299	138.736	242.402							0	326	12	324	101.736	174.054
459	256	PN220	CFL1	S3	Cofilin 1	0	464	14	521	234.45	411.963	386.581	25.382	6.56576	0	376	16	457	164.52	287.452	294.308	6.85607	2.32956	8.89532	-23.869		0	664	20	634	408.296	698.53	567.274	131.256	23.138	29.7037	46.7413
460	256	PN220	CFL1	S3	Cofilin 1	0	372	12	571	205.56	361.199				0	358	16	504	172.368	301.164							0	460	16	574	254.856	436.018
461	236	NK034-2	Chk1 (CHEK1)	Pan-specific	Checkpoint protein-serine kinase 1	0	458	10	682	305.536	536.872	511.119	25.7527	5.0385	0	465	10	615	279.825	488.914	492.771	3.85698	0.782711	5.82122	-3.58966		0	474	12	635	293.37	501.91	492.269	9.64059	1.9584	6.9969	-3.68798			CHK1	X	PSTK	Protein kinase - Non-receptor protein-serine/threonine	Protein-serine/threonine kinase	CAMK	CAMKL	CHK1
462	236	NK034-2	Chk1 (CHEK1)	Pan-specific	Checkpoint protein-serine kinase 1	0	428	12	664	276.224	485.366				0	434	16	680	284.24	496.628							0	446	12	650	282.1	482.628								CHK1	X	PSTK	Protein kinase - Non-receptor protein-serine/threonine	Protein-serine/threonine kinase	CAMK	CAMKL	CHK1
463	237	NK034	Chk1 (CHEK1)	Pan-specific	Checkpoint protein-serine kinase 1	0	1012	12	723	723	1270.42	1248	22.4212	1.79658	0	1052	14	573	594.774	1039.2	1107.52	68.3248	6.16916	7.96573	-11.2559		0	1276	14	694	875.828	1498.4	1356.84	141.565	10.4335	12.23	8.7213			CHK1	X	PSTK	Protein kinase - Non-receptor protein-serine/threonine	Protein-serine/threonine kinase	CAMK	CAMKL	CHK1
464	237	NK034	Chk1 (CHEK1)	Pan-specific	Checkpoint protein-serine kinase 1	0	954	14	742	697.48	1225.57				0	954	18	719	672.984	1175.85							0	1026	17	704	710.336	1215.27								CHK1	X	PSTK	Protein kinase - Non-receptor protein-serine/threonine	Protein-serine/threonine kinase	CAMK	CAMKL	CHK1
465	238	PK577	Chk1 (CHEK1)	S280	Checkpoint protein-serine kinase 1	0	7520	16	806	6048.22	10627.6	10437.1	190.512	1.82533	0	8589	22	757	6485.22	11331.1	11360.3	29.2169	0.257185	2.08251	8.8452		0	8380	16	748	6256.27	10703.5	10416	287.483	2.76001	4.58534	-0.202165			CHK1	X	PSTK	Protein kinase - Non-receptor protein-serine/threonine	Protein-serine/threonine kinase	CAMK	CAMKL	CHK1
466	238	PK577	Chk1 (CHEK1)	S280	Checkpoint protein-serine kinase 1	0	7246	20	807	5831.38	10246.6				0	8198	19	797	6518.66	11389.5							0	7820	20	759	5920.2	10128.5								CHK1	X	PSTK	Protein kinase - Non-receptor protein-serine/threonine	Protein-serine/threonine kinase	CAMK	CAMKL	CHK1
467	239	PK578	Chk1 (CHEK1)	S317	Checkpoint protein-serine kinase 1	0	6192	20	851	5252.37	9229.19	8956.71	272.479	3.04218	0	5856	24	800	4665.6	8151.81	8985.44	833.636	9.27762	12.3198	0.320793		0	6736	20	800	5372.8	9192.01	9084.78	107.229	1.18031	4.22249	1.42988			CHK1	X	PSTK	Protein kinase - Non-receptor protein-serine/threonine	Protein-serine/threonine kinase	CAMK	CAMKL	CHK1
468	239	PK578	Chk1 (CHEK1)	S317	Checkpoint protein-serine kinase 1	0	6108	14	811	4942.23	8684.23				0	6666	31	847	5619.85	9819.08							0	6404	28	823	5247.45	8977.55								CHK1	X	PSTK	Protein kinase - Non-receptor protein-serine/threonine	Protein-serine/threonine kinase	CAMK	CAMKL	CHK1
469	240	PK579	Chk1 (CHEK1)	S345	Checkpoint protein-serine kinase 1	0	3390	20	783	2638.71	4636.6	4357.48	279.123	6.4056	0	3187	18	703	2227.81	3892.46	4124.13	231.675	5.61754	12.0231	-5.35506		0	3696	18	793	2916.65	4989.93	4775.73	214.199	4.48516	10.8908	9.59856			CHK1	X	PSTK	Protein kinase - Non-receptor protein-serine/threonine	Protein-serine/threonine kinase	CAMK	CAMKL	CHK1
470	240	PK579	Chk1 (CHEK1)	S345	Checkpoint protein-serine kinase 1	0	3050	16	765	2321.01	4078.36				0	3014	14	831	2493	4355.81							0	3372	14	794	2666.25	4561.53								CHK1	X	PSTK	Protein kinase - Non-receptor protein-serine/threonine	Protein-serine/threonine kinase	CAMK	CAMKL	CHK1
471	241	NK035	Chk2 (CHEK2)	Pan-specific	Checkpoint protein-serine kinase 2	0	796	16	760	592.8	1041.64	918.433	123.204	13.4146	0	750	14	664	488.704	853.871	862.853	8.98243	1.04101	14.4556	-6.05152		0	889	12	711	623.547	1066.79	989.902	76.8878	7.76721	21.1818	7.7817			CHK2	X	PSTK	Protein kinase - Non-receptor protein-serine/threonine	Protein-serine/threonine kinase	CAMK	RAD53
472	241	NK035	Chk2 (CHEK2)	Pan-specific	Checkpoint protein-serine kinase 2	0	707	15	654	452.568	795.228				0	712	18	719	498.986	871.836							0	832	16	654	533.664	913.014								CHK2	X	PSTK	Protein kinase - Non-receptor protein-serine/threonine	Protein-serine/threonine kinase	CAMK	RAD53
473	242	NK035-2	Chk2 (CHEK2)	Pan-specific	Checkpoint protein-serine kinase 2	0	136	12	634	78.616	138.14	133.128	5.01138	3.76432	0	352	18	705	235.47	411.417	278.169	133.248	47.9018	51.6661	108.948		0	176	16	639	102.24	174.916	154.906	20.01	12.9175	16.6818	16.3586			CHK2	X	PSTK	Protein kinase - Non-receptor protein-serine/threonine	Protein-serine/threonine kinase	CAMK	RAD53
474	242	NK035-2	Chk2 (CHEK2)	Pan-specific	Checkpoint protein-serine kinase 2	0	124	12	651	72.912	128.117				0	142	14	648	82.944	144.921							0	144	16	616	78.848	134.896								CHK2	X	PSTK	Protein kinase - Non-receptor protein-serine/threonine	Protein-serine/threonine kinase	CAMK	RAD53
475	243	PK581	Chk2 (CHEK2)	T68	Checkpoint protein-serine kinase 2	0	9128	24	837	7620.05	13389.5	13682.1	292.573	2.13836	0	9230	30	844	7764.8	13566.8	14470	903.24	6.24215	8.38051	5.75861		0	9587	36	794	7583.49	12974.2	13404.6	430.467	3.21133	5.34969	-2.02816			CHK2	X	PSTK	Protein kinase - Non-receptor protein-serine/threonine	Protein-serine/threonine kinase	CAMK	RAD53
476	243	PK581	Chk2 (CHEK2)	T68	Checkpoint protein-serine kinase 2	0	9257	20	861	7953.06	13974.7				0	9850	30	896	8798.72	15373.3							0	9106	30	891	8086.72	13835.1								CHK2	X	PSTK	Protein kinase - Non-receptor protein-serine/threonine	Protein-serine/threonine kinase	CAMK	RAD53
477	244	PK580	Chk2 (CHEK2)	T383	Checkpoint protein-serine kinase 2	0	9076	18	813	7364.15	12939.9	12663.8	276.055	2.17987	0	9322	18	749	6968.7	12175.8	13555.6	1379.75	10.1785	12.3583	7.0414		0	10243	54	578	5889.24	10075.6	11831.5	1755.96	14.8414	17.0213	-6.57244			CHK2	X	PSTK	Protein kinase - Non-receptor protein-serine/threonine	Protein-serine/threonine kinase	CAMK	RAD53
478	244	PK580	Chk2 (CHEK2)	T383	Checkpoint protein-serine kinase 2	0	8978	20	787	7049.95	12387.8				0	9539	20	898	8548.06	14935.3							0	9635	20	826	7941.99	13587.5								CHK2	X	PSTK	Protein kinase - Non-receptor protein-serine/threonine	Protein-serine/threonine kinase	CAMK	RAD53
479	849	PN249	Cip (WAF1; p21) p21(WAF1/CIP1)	T145	Cyclin-dependent kinase inhibitor 1	0	42	6	652	23.472	41.2438	83.7316	42.4878	50.7429	0	108	8	340	34	59.4053	64.612	5.2067	8.05841	58.8013	-22.8343		0	127	10	368	43.056	73.662	86.1759	12.5139	14.5214	65.2643	2.9193
480	849	PN249	Cip (WAF1; p21) p21(WAF1/CIP1)	T145	Cyclin-dependent kinase inhibitor 1	0	156	10	492	71.832	126.219				0	128	8	333	39.96	69.8187							0	147	8	415	57.685	98.6899
481	850	PN248	Cip (WAF1; p21) p21(WAF1/CIP1)	S146	Cyclin-dependent kinase inhibitor 1	0	24	8	657	10.512	18.4711	58.5411	40.07	68.4476	0	28	6	656	14.432	25.2158	27.6899	2.47406	8.93488	77.3825	-52.7001		0	26	6	658	13.16	22.5147	39.5889	17.0742	43.1288	111.576	-32.3742
482	850	PN248	Cip (WAF1; p21) p21(WAF1/CIP1)	S146	Cyclin-dependent kinase inhibitor 1	0	130	8	460	56.12	98.6111				0	36	10	664	17.264	30.1639							0	102	10	360	33.12	56.6631
483	245	NK036	CK1 delta (CSNK1D)	Pan-specific	Casein protein-serine kinase 1 delta	0	388	16	660	245.52	431.415	428.705	2.70952	0.632024	0	367	16	587	206.037	359.991	374.424	14.4329	3.85469	4.48671	-12.6617		0	408	16	621	243.432	416.474	425.579	9.1051	2.13946	2.77149	-0.729299			CK1d	X	PSTK	Protein kinase - Non-receptor protein-serine/threonine	Protein-serine/threonine kinase	CK1	CK1
484	245	NK036	CK1 delta (CSNK1D)	Pan-specific	Casein protein-serine kinase 1 delta	0	368	12	681	242.436	425.996				0	310	16	757	222.558	388.857							0	388	16	683	254.076	434.684								CK1d	X	PSTK	Protein kinase - Non-receptor protein-serine/threonine	Protein-serine/threonine kinase	CK1	CK1
485	246	NK037-1	CK1 epsilon (CSNK1E)	Pan-specific	Casein protein-serine kinase 1 epsilon	0	3598	14	513	1838.59	3230.68	3028.22	202.455	6.68561	0	3866	16	541	2082.85	3639.19	3344.3	294.886	8.81758	15.5032	10.4378		0	3904	12	552	2148.38	3675.54	3332.51	343.034	10.2936	16.9792	10.0484			CK1e	X	PSTK	Protein kinase - Non-receptor protein-serine/threonine	Protein-serine/threonine kinase	CK1	CK1
486	246	NK037-1	CK1 epsilon (CSNK1E)	Pan-specific	Casein protein-serine kinase 1 epsilon	0	3085	16	524	1608.16	2825.77				0	3116	16	563	1745.3	3049.41							0	3336	14	526	1747.37	2989.48								CK1e	X	PSTK	Protein kinase - Non-receptor protein-serine/threonine	Protein-serine/threonine kinase	CK1	CK1
487	247	NK041-3	CK2a1 (CSNK2A1)	Pan-specific	Casein protein-serine kinase 2 alpha/ alpha prime	0	238	14	668	149.632	262.925	262.709	0.216129	0.0822693	0	252	14	503	119.714	209.166	183.984	25.1826	13.6874	13.7697	-29.9669		0	242	22	647	142.34	243.521	247.867	4.34554	1.75318	1.83544	-5.64981			CK2a1	X	PSTK	Protein kinase - Non-receptor protein-serine/threonine	Protein-serine/threonine kinase	Other	CK2
488	247	NK041-3	CK2a1 (CSNK2A1)	Pan-specific	Casein protein-serine kinase 2 alpha/ alpha prime	0	246	20	661	149.386	262.493				0	182	14	541	90.888	158.801							0	252	18	630	147.42	252.212								CK2a1	X	PSTK	Protein kinase - Non-receptor protein-serine/threonine	Protein-serine/threonine kinase	Other	CK2
489	248	NK041-2	CK2a1 (CSNK2A1)	Pan-specific	Casein protein-serine kinase 2 alpha/ alpha prime	0	2562	14	1004	2558.19	4495.12	4656.89	161.77	3.47378	0	3668	16	642	2344.58	4096.49	4546.85	450.355	9.90478	13.3786	-2.36298		0	3948	16	648	2547.94	4359.11	4574.95	215.836	4.71778	8.19156	-1.75951			CK2a1	X	DSK	Protein kinase - Non-receptor protein-serine/threonine	Protein-serine/threonine kinase	Other	CK2
490	248	NK041-2	CK2a1 (CSNK2A1)	Pan-specific	Casein protein-serine kinase 2 alpha/ alpha prime	0	4146	16	664	2742.32	4818.66				0	3906	20	736	2860.1	4997.2							0	4098	16	686	2800.25	4790.79								CK2a1	X	DSK	Protein kinase - Non-receptor protein-serine/threonine	Protein-serine/threonine kinase	Other	CK2
491	249	PK582	CK2a1 (CSNK2A1)	Y255	Casein protein-serine kinase 2 alpha/ alpha prime	0	268	12	422	108.032	189.828	174.184	15.6439	8.98123	0	187	16	364	62.244	108.754	128.14	19.3862	15.129	24.1102	-26.4343		0	255	14	371	89.411	152.968	155.788	2.82032	1.81035	10.7916	-10.5611			CK2a1	X	DSK	Protein kinase - Non-receptor protein-serine/threonine	Protein-serine/threonine kinase	Other	CK2
492	249	PK582	CK2a1 (CSNK2A1)	Y255	Casein protein-serine kinase 2 alpha/ alpha prime	0	209	12	458	90.226	158.54				0	211	16	433	84.435	147.526							0	208	12	473	92.708	158.609								CK2a1	X	DSK	Protein kinase - Non-receptor protein-serine/threonine	Protein-serine/threonine kinase	Other	CK2
493	250	PK167	CK2a1 (CSNK2A1)	T360+S362	Casein protein-serine kinase 2 alpha/ alpha prime	0	1598	12	338	536.068	941.95	1022.4	80.4475	7.86851	0	2581	12	303	778.407	1360.04	1234.49	125.554	10.1705	18.039	20.7446		0	9	2	475	3.325	5.68855	445.631	439.942	98.7235	106.592	-56.4132			CK2a1	X	DSK	Protein kinase - Non-receptor protein-serine/threonine	Protein-serine/threonine kinase	Other	CK2
494	250	PK167	CK2a1 (CSNK2A1)	T360+S362	Casein protein-serine kinase 2 alpha/ alpha prime	0	1790	12	353	627.634	1102.85				0	1702	14	376	634.688	1108.94							0	1466	12	356	517.624	885.573								CK2a1	X	DSK	Protein kinase - Non-receptor protein-serine/threonine	Protein-serine/threonine kinase	Other	CK2
495	251	PK583	CLK1	S337	Dual specificity protein kinase CLK1	0	4630	18	710	3274.52	5753.81	5787.49	33.6775	0.581901	0	4094	26	687	2794.72	4882.97	6044.38	1161.41	19.2147	19.7966	4.43875		0	3994	14	670	2666.6	4562.13	5089.39	527.257	10.3599	10.9418	-12.0623			CLK1	X	DSK	Protein kinase - Non-receptor protein-serine/threonine	Protein-serine/threonine kinase	CMGC	CLK
496	251	PK583	CLK1	S337	Dual specificity protein kinase CLK1	0	4628	14	718	3312.85	5821.17				0	5390	20	768	4124.16	7205.79							0	4536	14	726	3282.97	5616.64								CLK1	X	DSK	Protein kinase - Non-receptor protein-serine/threonine	Protein-serine/threonine kinase	CMGC	CLK
497	252	PK584	CLK1	S337+T338	Dual specificity protein kinase CLK1	0	4326	20	866	3729	6552.39	5998.54	553.856	9.23319	0	4430	22	908	4002.46	6993.17	6197.29	795.877	12.8424	22.0755	3.31332		0	4595	18	831	3803.49	6507.16	5847.81	659.352	11.2752	20.5084	-2.51273			CLK1	X	DSK	Protein kinase - Non-receptor protein-serine/threonine	Protein-serine/threonine kinase	CMGC	CLK
498	252	PK584	CLK1	S337+T338	Dual specificity protein kinase CLK1	0	4200	24	742	3098.59	5444.68				0	4728	44	660	3091.44	5401.41							0	4784	38	639	3032.69	5188.46								CLK1	X	DSK	Protein kinase - Non-receptor protein-serine/threonine	Protein-serine/threonine kinase	CMGC	CLK
499	253	NK370-1	CLK1/4	Pan-specific	Dual specificity protein kinase CLK1/4	0	182	14	552	92.736	162.951	147.884	15.0667	10.1882	0	210	14	504	98.784	172.597	163.099	9.49786	5.82337	16.0115	10.2884		0	204	18	612	113.832	194.748	175.466	19.2829	10.9896	21.1777	18.6507			CLK1	X	DSK	Protein kinase - Non-receptor protein-serine/threonine	Protein-serine/threonine kinase	CMGC	CLK
500	253	NK370-1	CLK1/4	Pan-specific	Dual specificity protein kinase CLK1/4	0	148	17	577	75.587	132.817				0	166	18	594	87.912	153.601							0	188	18	537	91.29	156.183								CLK1	X	DSK	Protein kinase - Non-receptor protein-serine/threonine	Protein-serine/threonine kinase	CMGC	CLK
501	254	NK372-1	CLK3	Pan-specific	Dual specificity protein kinase CLK3	0	754	14	672	497.28	873.794	851.949	21.8449	2.5641	0	906	18	661	586.968	1025.56	892.149	133.41	14.9538	17.5179	4.71857		0	890	14	708	620.208	1061.08	997.67	63.4072	6.35553	8.91963	17.1044			CLK3	X	DSK	Protein kinase - Non-receptor protein-serine/threonine	Protein-serine/threonine kinase	CMGC	CLK
502	254	NK372-1	CLK3	Pan-specific	Dual specificity protein kinase CLK3	0	690	18	703	472.416	830.104				0	680	16	654	434.256	758.739							0	806	18	693	546.084	934.263								CLK3	X	DSK	Protein kinase - Non-receptor protein-serine/threonine	Protein-serine/threonine kinase	CMGC	CLK
503	284	NN029	CLNB1	Pan-specific	Cyclin B1	0	166	12	601	92.554	162.631	155.796	6.8353	4.38735	0	202	14	600	112.8	197.086	184.925	12.1606	6.57596	10.9633	18.6973		0	204	12	548	105.216	180.008	183.929	3.92125	2.13193	6.51928	18.0579
504	284	NN029	CLNB1	Pan-specific	Cyclin B1	0	156	14	597	84.774	148.96				0	172	12	618	98.88	172.765							0	192	12	610	109.8	187.85
505	285	PN190	CLNB1	S147	Cyclin B1	0	538	12	382	200.932	353.067	323.354	29.7134	9.18912	0	962	14	334	316.632	553.224	484.882	68.3423	14.0946	23.2838	49.954		0	695	16	390	264.81	453.048	383.1	69.9478	18.2583	27.4475	18.4771
506	285	PN190	CLNB1	S147	Cyclin B1	0	432	10	396	167.112	293.64				0	613	14	398	238.402	416.54							0	534	14	352	183.04	313.152
507	286	PN191	CLNE	T395	Cyclin E	0	702	14	382	262.816	461.806	520.692	58.8855	11.3091	0	1188	12	389	457.464	799.288	504.82	294.468	58.3312	69.6403	-3.04817		0	20	6	753	10.542	18.0357	18.3522	0.316506	1.72462	13.0337	-96.4754
508	286	PN191	CLNE	T395	Cyclin E	1	634	14	532	329.84	579.577				1	653	16	189	120.393	210.352							1	26	10	682	10.912	18.6687
509	257	PN148	Connexin 43	S368	Gap junction alpha-1 protein	0	1782	12	394	697.38	1225.4	1198.61	26.7895	2.23504	0	2465	14	286	700.986	1224.77	1251.38	26.6092	2.12639	4.36143	4.40285		0	1946	12	383	740.722	1267.26	1210.38	56.8752	4.69894	6.93399	0.982222
510	257	PN148	Connexin 43	S368	Gap junction alpha-1 protein	0	1512	10	444	666.888	1171.82				0	1829	14	403	731.445	1277.99							0	1625	12	418	674.234	1153.51
511	258	NN398-1	Connexin 43	Pan-specific	Gap junction alpha-1 protein	0	308	12	582	172.272	302.707	330.723	28.016	8.47112	0	298	14	583	165.572	289.29	251.442	37.8482	15.0525	23.5236	-23.9721		0	383	16	584	214.328	366.681	375.862	9.18037	2.44249	10.9136	13.6484
512	258	NN398-1	Connexin 43	Pan-specific	Gap junction alpha-1 protein	0	332	12	638	204.16	358.739				0	250	14	518	122.248	213.594							0	390	18	605	225.06	385.042
513	259	NK042-1	COT (MAP3K8, TPL2)	Pan-specific	Osaka thyroid oncogene protein-serine kinase (Tpl2); Mitogen-activated protein kinase kinase kinase 8	0	4084	16	832	3384.58	5947.2	5900.41	46.7893	0.792984	0	4180	16	695	2893.98	5056.41	5385.13	328.727	6.10435	6.89733	-8.73287		0	4526	16	850	3833.5	6558.51	6399.75	158.758	2.48068	3.27367	8.46289			COT	X	PSTK	Protein kinase - Non-receptor protein-serine/threonine	Protein-serine/threonine kinase	STE	STE-Unique
514	259	NK042-1	COT (MAP3K8, TPL2)	Pan-specific	Osaka thyroid oncogene protein-serine kinase (Tpl2); Mitogen-activated protein kinase kinase kinase 8	0	3928	18	852	3331.32	5853.62				0	4010	17	819	3270.27	5713.86							0	4205	12	870	3647.91	6241								COT	X	PSTK	Protein kinase - Non-receptor protein-serine/threonine	Protein-serine/threonine kinase	STE	STE-Unique
515	260	NK042-2	COT (MAP3K8, TPL2)	Pan-specific	Osaka thyroid oncogene protein-serine kinase (Tpl2); Mitogen-activated protein kinase kinase kinase 8	0	3322	16	878	2902.67	5100.41	4735.24	365.174	7.71183	0	3243	16	710	2291.17	4003.17	3835.86	167.308	4.36169	12.0735	-18.9934		0	3746	18	870	3243.36	5548.87	5203.15	345.727	6.64457	14.3564	9.88139			COT	X	PSTK	Protein kinase - Non-receptor protein-serine/threonine	Protein-serine/threonine kinase	STE	STE-Unique
516	260	NK042-2	COT (MAP3K8, TPL2)	Pan-specific	Osaka thyroid oncogene protein-serine kinase (Tpl2); Mitogen-activated protein kinase kinase kinase 8	0	3102	24	808	2487.02	4370.07				0	3124	18	676	2099.66	3668.55							0	3386	26	845	2839.2	4857.42								COT	X	PSTK	Protein kinase - Non-receptor protein-serine/threonine	Protein-serine/threonine kinase	STE	STE-Unique
517	261	PK585	COT (MAP3K8, TPL2)	S334	Osaka thyroid oncogene protein-serine kinase (Tpl2); Mitogen-activated protein kinase kinase kinase 8	0	9890	18	815	8045.68	14137.4	13784.8	352.652	2.55827	0	9806	18	754	7380.15	12894.7	13481.7	587.015	4.35416	6.91243	-2.19851		0	9586	14	800	7657.6	13100.9	13267.6	166.65	1.25607	3.81434	-3.75197			COT	X	PSTK	Protein kinase - Non-receptor protein-serine/threonine	Protein-serine/threonine kinase	STE	STE-Unique
518	261	PK585	COT (MAP3K8, TPL2)	S334	Osaka thyroid oncogene protein-serine kinase (Tpl2); Mitogen-activated protein kinase kinase kinase 8	0	9384	16	816	7644.29	13432.1				0	9694	16	832	8052.1	14068.7							0	9462	24	832	7852.42	13434.2								COT	X	PSTK	Protein kinase - Non-receptor protein-serine/threonine	Protein-serine/threonine kinase	STE	STE-Unique
519	262	PN695	COX2	Y446	Prostaglandin G/H synthase 2	0	580	16	579	326.556	573.807	562.333	11.4742	2.04046	0	410	16	443	174.542	304.962	461.403	156.44	33.9054	35.9458	-17.9484		0	542	10	551	293.132	501.502	520.717	19.2145	3.69	5.73046	-7.40058
520	262	PN695	COX2	Y446	Prostaglandin G/H synthase 2	0	538	12	596	313.496	550.859				0	578	22	636	353.616	617.843							0	548	14	591	315.594	539.931
521	263	NN027-2	COX2	Pan-specific	Prostaglandin G/H synthase 2	0	220	12	582	121.056	212.713	211.668	1.0455	0.493936	0	228	10	503	109.654	191.589	262.523	70.9334	27.0199	27.5139	24.0258		0	210	10	553	110.6	189.219	210.69	21.4711	10.1908	10.6848	-0.461834
522	263	NN027-2	COX2	Pan-specific	Prostaglandin G/H synthase 2	0	156	10	821	119.866	210.622				0	288	13	694	190.85	333.456							0	240	10	590	135.7	232.161
523	265	PN221	CPS2 (CAD)	T456	Carbamoyl phosphate synthetase 2	0	538	18	590	306.8	539.093	503.739	35.3538	7.01828	0	454	12	503	222.326	388.451	424.958	36.5063	8.59058	15.6089	-15.6393		0	474	14	610	280.6	480.062	533.414	53.3517	10.0019	17.0202	5.89094
524	265	PN221	CPS2 (CAD)	T456	Carbamoyl phosphate synthetase 2	0	462	14	595	266.56	468.385				0	450	12	603	264.114	461.464							0	561	14	627	342.969	586.766
525	266	PN577	CREB1	S129+S133	cAMP-response element-binding protein 1	0	9098	18	983	8925.64	15683.7	15530.5	153.118	0.985914	0	9155	20	800	7308	12768.6	14996.9	2228.2	14.8578	15.8437	-3.4364		0	9037	22	1009	9096.14	15562	14598.3	963.747	6.60178	7.58769	-6.00266						Transcription protein					X
526	266	PN577	CREB1	S129+S133	cAMP-response element-binding protein 1	0	8498	18	1032	8751.36	15377.4				0	9536	20	1036	9858.58	17225.1							0	8272	22	966	7969.5	13634.6											Transcription protein					X
527	267	PN553	CREB1	S133	cAMP-response element-binding protein 1	0	12822	20	794	10164.8	17861	16654.2	1206.87	7.24666	0	13402	20	799	10692.2	18681.6	18594.9	86.7248	0.466391	7.71305	11.6531		0	13961	18	793	11056.8	18916.4	17772.2	1144.19	6.43809	13.6848	6.71353						Transcription protein					X
528	267	PN553	CREB1	S133	cAMP-response element-binding protein 1	0	11997	20	734	8791.12	15447.3				0	14074	25	754	10592.9	18508.2							0	13334	20	730	9719.22	16628											Transcription protein					X
529	268	NN182-2	CrkL	Pan-specific	Crk-like protein	0	1110	16	642	702.348	1234.13	1239.04	4.91562	0.396727	0	1113	14	536	589.064	1029.22	1200.72	171.5	14.2831	14.6798	-3.09295		0	1312	20	649	838.508	1434.55	1367.85	66.704	4.87656	5.27328	10.3956
530	268	NN182-2	CrkL	Pan-specific	Crk-like protein	0	1119	18	643	707.943	1243.96				0	1228	16	648	785.376	1372.22							0	1273	18	606	760.53	1301.15
531	269	PN507	CrkL	Y251	Crk-like protein	0	1073	15	630	666.54	1171.21	1155.48	15.73	1.36134	0	756	20	569	418.784	731.706	1086.89	355.181	32.6787	34.0401	-5.93625		0	1212	24	545	647.46	1107.7	1142.23	34.5248	3.02259	4.38393	-1.14693
532	269	PN507	CrkL	Y251	Crk-like protein	0	1148	16	573	648.636	1139.75				0	1265	22	664	825.352	1442.07							0	1176	20	595	687.82	1176.75
533	270	PN025	CRYAB	S19	Crystallin aB	0	856	12	381	321.564	565.035	577.499	12.4634	2.15818	0	750	12	382	281.916	492.568	498.519	5.95101	1.19374	3.35192	-13.6762		0	959	12	391	370.277	633.485	630.1	3.3849	0.5372	2.69538	9.10854												X
534	270	PN025	CRYAB	S19	Crystallin aB	0	798	8	425	335.75	589.962				0	762	14	386	288.728	504.47							0	978	14	380	366.32	626.715																	X
535	271	PN110	CRYAB	S45	Crystallin aB	0	1922	14	433	826.164	1451.69	1416.04	35.6508	2.51764	0	1871	14	395	733.515	1281.61	1456.54	174.927	12.0098	14.5274	2.8597		0	2303	14	432	988.848	1691.76	1732.72	40.9593	2.36387	4.8815	22.3638												X
536	271	PN110	CRYAB	S45	Crystallin aB	0	1878	12	421	785.586	1380.39				0	2087	12	450	933.75	1631.46							0	2423	12	430	1036.73	1773.68																	X
537	272	NK234-3	CSF1R (Fms)	Pan-specific	Macrophage colony-stimulating factor 1 receptor	0	9498	18	809	7669.32	13476.1	13248.5	227.589	1.71784	0	5619	12	1000	5607	9796.64	12112.8	2316.2	19.1219	20.8397	-8.57222		0	10504	20	731	7663.8	13111.6	13487.3	375.701	2.7856	4.50344	1.80187			Fms	X	PYK	Protein kinase - Receptor protein-tyrosine	Protein-tyrosine kinase	TK	PDGFR
538	272	NK234-3	CSF1R (Fms)	Pan-specific	Macrophage colony-stimulating factor 1 receptor	0	9592	18	774	7410.28	13020.9				0	10332	22	801	8258.31	14429							0	10260	16	791	8103	13863								Fms	X	PYK	Protein kinase - Receptor protein-tyrosine	Protein-tyrosine kinase	TK	PDGFR
539	273	NK234-4	CSF1R (Fms)	Pan-specific	Macrophage colony-stimulating factor 1 receptor	0	9658	22	889	8566.4	15052.4	14911.2	141.243	0.947228	0	10059	18	752	7550.83	13192.9	13636.1	443.147	3.24981	4.19704	-8.55138		0	10278	22	857	8789.39	15037.3	15515	477.732	3.07916	4.02639	4.04931			Fms	X	PYK	Protein kinase - Receptor protein-tyrosine	Protein-tyrosine kinase	TK	PDGFR
540	273	NK234-4	CSF1R (Fms)	Pan-specific	Macrophage colony-stimulating factor 1 receptor	0	9310	22	905	8405.64	14769.9				0	10255	16	787	8058.09	14079.2							0	10104	20	927	9347.87	15992.7								Fms	X	PYK	Protein kinase - Receptor protein-tyrosine	Protein-tyrosine kinase	TK	PDGFR
541	274	PK587	CSF1R (Fms)	Y699	Macrophage colony-stimulating factor 1 receptor	0	1464	18	643	929.778	1633.76	1617.34	16.4205	1.01528	0	1362	20	605	811.91	1418.58	1577.09	158.506	10.0505	11.0658	-2.48859		0	1478	16	640	935.68	1600.8	1619.43	18.6276	1.15026	2.16554	0.129332			Fms	X	PYK	Protein kinase - Receptor protein-tyrosine	Protein-tyrosine kinase	TK	PDGFR
542	274	PK587	CSF1R (Fms)	Y699	Macrophage colony-stimulating factor 1 receptor	0	1348	16	684	911.088	1600.92				0	1494	18	673	993.348	1735.59							0	1482	18	654	957.456	1638.06								Fms	X	PYK	Protein kinase - Receptor protein-tyrosine	Protein-tyrosine kinase	TK	PDGFR
543	275	PK586	CSF1R (Fms)	S807+Y809	Macrophage colony-stimulating factor 1 receptor	0	5958	16	837	4973.45	8739.09	8768.34	29.2477	0.333561	0	5646	18	723	4069.04	7109.5	7965.14	855.643	10.7423	11.0759	-9.16022		0	6070	18	778	4708.46	8055.42	8154.97	99.5504	1.22073	1.55429	-6.99523			Fms	X	PYK	Protein kinase - Receptor protein-tyrosine	Protein-tyrosine kinase	TK	PDGFR
544	275	PK586	CSF1R (Fms)	S807+Y809	Macrophage colony-stimulating factor 1 receptor	0	5863	14	856	5006.74	8797.58				0	5584	24	908	5048.48	8820.78							0	6032	16	802	4824.83	8254.52								Fms	X	PYK	Protein kinase - Receptor protein-tyrosine	Protein-tyrosine kinase	TK	PDGFR
545	276	PK588	CSF1R (Fms)	Y809	Macrophage colony-stimulating factor 1 receptor	0	2837	14	670	1891.41	3323.49	3494.73	171.248	4.90017	0	2512	16	578	1442.69	2520.69	2990.68	469.994	15.7153	20.6155	-14.4232		0	3138	16	700	2185.4	3738.87	3595.71	143.163	3.9815	8.88168	2.88939			Fms	X	PYK	Protein kinase - Receptor protein-tyrosine	Protein-tyrosine kinase	TK	PDGFR
546	276	PK588	CSF1R (Fms)	Y809	Macrophage colony-stimulating factor 1 receptor	0	2845	18	738	2086.33	3665.98				0	2956	26	676	1980.68	3460.67							0	3034	22	670	2018.04	3452.55								Fms	X	PYK	Protein kinase - Receptor protein-tyrosine	Protein-tyrosine kinase	TK	PDGFR
547	277	NK044-3	Csk	Pan-specific	C-terminus of Src tyrosine kinase	0	2350	10	760	1778.4	3124.91	2928.51	196.4	6.70648	0	2562	14	753	1918.64	3352.28	3357.42	5.13507	0.152947	6.85942	14.646		0	2412	13	689	1652.91	2827.87	2803.55	24.3205	0.867489	7.57396	-4.26709			CSK	X	PYK	Protein kinase - Non-receptor-tyrosine kinase	Protein-tyrosine kinase	TK	Csk
548	277	NK044-3	Csk	Pan-specific	C-terminus of Src tyrosine kinase	0	2116	12	739	1554.86	2732.11				0	1998	16	971	1924.52	3362.55							0	2284	12	715	1624.48	2779.23								CSK	X	PYK	Protein kinase - Non-receptor-tyrosine kinase	Protein-tyrosine kinase	TK	Csk
549	278	NK044	Csk	Pan-specific	C-terminus of Src tyrosine kinase	0	28	6	671	14.762	25.939	27.3693	1.43032	5.22599	0	24	2	696	15.312	26.7534	26.1838	0.569592	2.17536	7.40135	-4.33169		0	28	8	665	13.3	22.7542	23.1477	0.393494	1.69993	6.92591	-15.4247			CSK	X	PYK	Protein kinase - Non-receptor-tyrosine kinase	Protein-tyrosine kinase	TK	Csk
550	278	NK044	Csk	Pan-specific	C-terminus of Src tyrosine kinase	0	24	2	745	16.39	28.7996				0	22	2	733	14.66	25.6142							0	28	8	688	13.76	23.5412								CSK	X	PYK	Protein kinase - Non-receptor-tyrosine kinase	Protein-tyrosine kinase	TK	Csk
551	279	PK589	Csk	Y184	C-terminus of Src tyrosine kinase	0	2866	12	807	2303.18	4047.02	4022.95	24.0747	0.598434	0	2804	20	637	1773.41	3098.53	3571.68	473.153	13.2474	13.8458	-11.2174		0	2949	20	782	2290.48	3918.64	3925.41	6.76296	0.172287	0.77072	-2.42459			CSK	X	PYK	Protein kinase - Non-receptor-tyrosine kinase	Protein-tyrosine kinase	TK	Csk
552	279	PK589	Csk	Y184	C-terminus of Src tyrosine kinase	0	2644	10	864	2275.78	3998.87				0	2862	18	814	2315.02	4044.83							0	2916	14	792	2298.38	3932.17								CSK	X	PYK	Protein kinase - Non-receptor-tyrosine kinase	Protein-tyrosine kinase	TK	Csk
553	175	PN162	CTNNA1	S641	Catenin alpha-1	0	2101	14	297	619.839	1089.15	1003.47	85.6758	8.53794	0	2408	12	326	781.096	1364.74	1191.47	173.277	14.5431	23.0811	18.7343		0	1900	12	317	598.496	1023.93	908.939	114.992	12.6513	21.1892	-9.4206
554	175	PN162	CTNNA1	S641	Catenin alpha-1	0	1473	14	358	522.322	917.796				0	1864	14	315	582.75	1018.19							0	1176	10	398	464.068	793.947
555	176	NN021-2	CTNNB1	Pan-specific	Catenin (cadherin-associated protein) beta 1	0	94	10	456	38.304	67.3058	72.0975	4.79174	6.64619	0	110	10	502	50.2	87.7102	76.1436	11.5666	15.1905	21.8366	5.61204		0	102	10	465	42.78	73.1898	82.7021	9.51228	11.5019	18.1481	14.7087						Transcription protein; Cytoskeletal protein					X
556	176	NN021-2	CTNNB1	Pan-specific	Catenin (cadherin-associated protein) beta 1	0	74	8	663	43.758	76.8892				0	78	8	528	36.96	64.5771							0	106	8	550	53.9	92.2144											Transcription protein; Cytoskeletal protein					X
557	177	NN021	CTNNB1	Pan-specific	Catenin (cadherin-associated protein) beta 1	0	1118	10	876	970.608	1705.5	1567.61	137.89	8.79621	0	1076	9	875	933.625	1631.24	1441.24	190.007	13.1836	21.9798	-8.06155		0	2498	14	639	1587.28	2715.58	2032.92	682.654	33.5799	42.3761	29.683						Transcription protein; Cytoskeletal protein					X
558	177	NN021	CTNNB1	Pan-specific	Catenin (cadherin-associated protein) beta 1	0	1158	12	710	813.66	1429.72				0	1128	16	644	716.128	1251.23							0	1257	18	637	789.243	1350.27											Transcription protein; Cytoskeletal protein					X
559	178	PN166	CTNNB1	S33	Catenin (cadherin-associated protein) beta 1	0	2796	20	316	877.216	1541.4	841.621	699.777	83.1463	0	3912	22	339	1318.71	2304.07	1778.51	525.555	29.5502	112.697	111.32		0	2628	18	338	882.18	1509.27	1061.77	447.505	42.1472	125.294	26.1572						Transcription protein; Cytoskeletal protein					X
560	178	PN166	CTNNB1	S33	Catenin (cadherin-associated protein) beta 1	0	136	12	651	80.724	141.844				0	1974	20	367	717.118	1252.96							0	896	16	408	359.04	614.26											Transcription protein; Cytoskeletal protein					X
561	179	PN278	CTNNB1	S33+S37	Catenin (cadherin-associated protein) beta 1	0	26	8	684	12.312	21.634	25.324	3.69001	14.5712	0	26	4	666	14.652	25.6002	25.6579	0.0576581	0.224719	14.7959	1.31833		0	26	10	691	11.056	18.9151	21.9347	3.01964	13.7665	28.3377	-13.3838						Transcription protein; Cytoskeletal protein					X
562	179	PN278	CTNNB1	S33+S37	Catenin (cadherin-associated protein) beta 1	0	28	4	688	16.512	29.014				0	28	6	669	14.718	25.7155							0	28	6	663	14.586	24.9543											Transcription protein; Cytoskeletal protein					X
563	280	PN578	CTNNB1	S33+S37+T41+S45	Catenin (cadherin-associated protein) beta 1	0	9220	16	843	7758.97	13633.7	12783.9	849.769	6.64719	0	9178	16	745	6825.69	11925.9	12459.6	533.626	4.28286	10.93	-2.53686		0	8686	18	805	6977.74	11937.8	11288.8	648.999	5.74905	12.3962	-11.695						Transcription protein; Cytoskeletal protein					X
564	280	PN578	CTNNB1	S33+S37+T41+S45	Catenin (cadherin-associated protein) beta 1	0	8767	26	777	6791.76	11934.1				0	9570	36	780	7436.52	12993.2							0	8616	38	725	6219.05	10639.8											Transcription protein; Cytoskeletal protein					X
565	180	PN167	CTNNB1	Y333	Catenin (cadherin-associated protein) beta 1	0	2092	12	301	626.08	1100.11	584.48	515.635	88.2211	0	2823	16	312	875.784	1530.18	788.085	742.098	94.1648	182.386	34.8353		0	1986	16	302	594.94	1017.85	852.967	164.881	19.3302	107.551	45.9362						Transcription protein; Cytoskeletal protein					X
566	180	PN167	CTNNB1	Y333	Catenin (cadherin-associated protein) beta 1	0	68	8	653	39.18	68.845				0	48	8	658	26.32	45.9867							0	1190	14	342	402.192	688.087											Transcription protein; Cytoskeletal protein					X
567	281	PN745	CTNNB1	Y489	Catenin (cadherin-associated protein) beta 1	0	11719	20	709	8294.59	14574.8	14676.7	101.886	0.694199	0	11634	18	636	7387.78	12908	7468.02	5440.01	72.844	73.5382	-49.1165		0	11146	22	729	8109.4	13873.9	13604.1	269.776	1.98305	2.67724	-7.30808						Transcription protein; Cytoskeletal protein					X
568	281	PN745	CTNNB1	Y489	Catenin (cadherin-associated protein) beta 1	0	10626	20	793	8410.56	14778.6				0	1142	14	1029	1160.71	2028.01							0	10940	24	714	7794.02	13334.3											Transcription protein; Cytoskeletal protein					X
569	282	PN579	CTNNB1	Y654	Catenin (cadherin-associated protein) beta 1	0	7781	26	897	6956.23	12223.1	10277.1	1946.04	18.9357	0	8790	25	870	7625.55	13323.5	13155.3	168.202	1.27859	20.2143	28.0058		0	5672	22	810	4576.5	7829.67	9552.14	1722.47	18.0323	36.968	-7.05409						Transcription protein; Cytoskeletal protein					X
570	282	PN579	CTNNB1	Y654	Catenin (cadherin-associated protein) beta 1	0	5762	22	826	4741.24	8331.06				0	8657	24	861	7433.01	12987.1							0	7674	20	861	6590.09	11274.6											Transcription protein; Cytoskeletal protein					X
571	283	PN580	CUX1 (CUTL1)	S1270	Homeobox protein cut-like 1	0	5421	18	814	4398.04	7728.01	7143.79	584.22	8.17801	0	5827	16	686	3986.35	6965	7755.23	790.225	10.1896	18.3676	8.55909		0	5642	16	793	4461.42	7632.78	7799.31	166.532	2.13521	10.3132	9.17614						Transcription protein					X
572	283	PN580	CUX1 (CUTL1)	S1270	Homeobox protein cut-like 1	0	4528	14	827	3733.08	6559.57				0	5970	20	822	4890.9	8545.45							0	5726	20	816	4656.1	7965.84											Transcription protein					X
573	1351	NK188-1	DAPK3 (ZIPK)	Pan-specific	ZIP kinase (death associated protein-serine kinase 3 (DAPK3))	0	426	42	1028	394.752	693.637	558.822	134.815	24.1249	0	464	44	1021	428.82	749.241	539.664	209.577	38.8347	62.9596	-3.42825		0	530	61	958	449.302	768.684	546.345	222.339	40.6957	64.8207	-2.23268			DAPK3	X	PSTK	Protein kinase - Non-receptor protein-serine/threonine	Protein-serine/threonine kinase	CAMK	DAPK
574	1351	NK188-1	DAPK3 (ZIPK)	Pan-specific	ZIP kinase (death associated protein-serine kinase 3 (DAPK3))	0	286	38	973	241.304	424.007				0	278	56	851	188.922	330.087							0	452	140	607	189.384	324.006								DAPK3	X	PSTK	Protein kinase - Non-receptor protein-serine/threonine	Protein-serine/threonine kinase	CAMK	DAPK
575	264	NK043	DCAMLK1 (CaMKinase VI, DCLK1)	Pan-specific	Serine-threonine-protein kinase DCAMKL1	0	410	10	359	143.6	252.326	199.805	52.5211	26.2862	0	694	12	297	202.554	353.905	224.379	129.526	57.7265	84.0127	12.299		0	500	10	341	167.09	285.864	226.64	59.2242	26.1314	52.4175	13.4306			DCAMKL1	X	PSTK	Protein kinase - Non-receptor protein-serine/threonine	Protein-serine/threonine kinase	CAMK	DCAMKL
576	264	NK043	DCAMLK1 (CaMKinase VI, DCLK1)	Pan-specific	Serine-threonine-protein kinase DCAMKL1	0	264	10	330	83.82	147.284				0	184	10	312	54.288	94.8528							0	288	10	352	97.856	167.416								DCAMKL1	X	PSTK	Protein kinase - Non-receptor protein-serine/threonine	Protein-serine/threonine kinase	CAMK	DCAMKL
577	287	PN696	DCK	S74	Deoxycytidine kinase	0	12821	18	779	9973.54	17525	16386.4	1138.59	6.94839	0	12748	16	653	8314	14526.3	16235.3	1709.01	10.5265	17.4749	-0.921698		0	12700	16	702	8904.17	15233.6	15544.6	310.99	2.00063	8.94902	-5.13701						Enzyme - Metabolite kinase
578	287	PN696	DCK	S74	Deoxycytidine kinase	0	11466	18	758	8677.58	15247.8				0	12888	18	798	10270.3	17944.4							0	12412	22	748	9267.72	15855.6											Enzyme - Metabolite kinase
579	288	NK263-1	DDR1	Pan-specific	Epithelial discoidin domain-containing receptor 1	0	3370	14	776	2604.26	4576.06	4320.51	255.545	5.9147	0	2860	18	689	1958.14	3421.29	3726.49	305.202	8.19006	14.1048	-13.7489		0	3122	14	719	2234.65	3823.14	4027.06	203.922	5.0638	10.9785	-6.79219			DDR1	X	PYK	Protein kinase - Receptor-tyrosine kinase	Protein-tyrosine kinase	TK	DDR
580	288	NK263-1	DDR1	Pan-specific	Epithelial discoidin domain-containing receptor 1	0	3070	14	757	2313.39	4064.97				0	2750	16	844	2307.5	4031.69							0	3268	14	760	2473.04	4230.98								DDR1	X	PYK	Protein kinase - Receptor-tyrosine kinase	Protein-tyrosine kinase	TK	DDR
581	289	PK591	DDR1	Y796+Y797	Epithelial discoidin domain-containing receptor 1	0	3952	18	709	2789.21	4901.04	4719.39	181.652	3.84906	0	3064	20	617	1878.15	3281.53	3442.14	160.611	4.66602	8.51508	-27.0639		0	3710	18	671	2477.33	4238.32	4564.7	326.374	7.14996	10.999	-3.27789			DDR1	X	PYK	Protein kinase - Receptor-tyrosine kinase	Protein-tyrosine kinase	TK	DDR
582	289	PK591	DDR1	Y796+Y797	Epithelial discoidin domain-containing receptor 1	0	3522	18	737	2582.45	4537.74				0	2876	24	723	2062	3602.75							0	3724	16	771	2858.87	4891.07								DDR1	X	PYK	Protein kinase - Receptor-tyrosine kinase	Protein-tyrosine kinase	TK	DDR
583	290	PK592	DDR1	Y797	Epithelial discoidin domain-containing receptor 1	0	6833	18	840	5724.6	10059	9978.6	80.3631	0.805355	0	6639	18	851	5634.47	9844.63	9836.4	8.232	0.0836892	0.889044	-1.42504		0	6549	20	836	5458.24	9338.19	9422.7	84.5104	0.896881	1.70224	-5.57092			DDR1	X	PYK	Protein kinase - Receptor-tyrosine kinase	Protein-tyrosine kinase	TK	DDR
584	290	PK592	DDR1	Y797	Epithelial discoidin domain-containing receptor 1	0	6308	14	895	5633.13	9898.24				0	6576	20	858	5625.05	9828.17							0	6334	12	879	5557.04	9507.21								DDR1	X	PYK	Protein kinase - Receptor-tyrosine kinase	Protein-tyrosine kinase	TK	DDR
585	1293	NK183-1	DDR2 (Tyro10)	Pan-specific	Neurotrophic receptor-tyrosine kinase of discoidin domain receptor family, member 2 precursor	0	28	6	659	14.498	25.4751	28.7021	3.227	11.2431	0	32	8	680	16.32	28.5146	27.0958	1.41874	5.23601	16.4791	-5.59646		0	40	8	662	21.184	36.2425	41.3339	5.09146	12.3179	23.561	44.01				X	PYK	Protein kinase - Receptor-tyrosine kinase	Protein-tyrosine kinase	TK	DDR
586	1293	NK183-1	DDR2 (Tyro10)	Pan-specific	Neurotrophic receptor-tyrosine kinase of discoidin domain receptor family, member 2 precursor	0	38	11	673	18.171	31.9291				0	32	10	668	14.696	25.6771							0	76	12	424	27.136	46.4254									X	PYK	Protein kinase - Receptor-tyrosine kinase	Protein-tyrosine kinase	TK	DDR
587	291	NK183-3	DDR2 (Tyro10)	Pan-specific	Neurotrophic receptor-tyrosine kinase of discoidin domain receptor family, member 2 precursor	0	116	10	549	58.194	102.255	105.592	3.33682	3.1601	0	96	10	475	40.85	71.3737	77.2793	5.90559	7.64187	10.802	-26.8134		0	110	6	498	51.792	88.6079	107.106	18.4976	17.2705	20.4306	1.43314			DDR2	X	PYK	Protein kinase - Receptor-tyrosine kinase	Protein-tyrosine kinase	TK	DDR
588	291	NK183-3	DDR2 (Tyro10)	Pan-specific	Neurotrophic receptor-tyrosine kinase of discoidin domain receptor family, member 2 precursor	0	116	8	574	61.992	108.929				0	100	10	529	47.61	83.1849							0	150	12	532	73.416	125.603								DDR2	X	PYK	Protein kinase - Receptor-tyrosine kinase	Protein-tyrosine kinase	TK	DDR
589	292	PK593	DDR2 (Tyro10)	Y736	Discoidin domain-containing receptor 2	0	7422	16	656	4858.34	8536.81	8764.12	227.314	2.59369	0	7221	20	656	4723.86	8253.59	8874.59	620.994	6.99744	9.59113	1.2604		0	7702	18	642	4933.13	8439.8	8742.01	302.213	3.45702	6.05071	-0.252293			DDR2	X	PYK	Protein kinase - Receptor-tyrosine kinase	Protein-tyrosine kinase	TK	DDR
590	292	PK593	DDR2 (Tyro10)	Y736	Discoidin domain-containing receptor 2	0	7213	16	711	5117.07	8991.44				0	7471	16	729	5434.69	9495.58							0	7756	16	683	5286.42	9044.23								DDR2	X	PYK	Protein kinase - Receptor-tyrosine kinase	Protein-tyrosine kinase	TK	DDR
591	293	PK594	DDR2 (Tyro10)	Y740	Discoidin domain-containing receptor 2	0	6384	20	843	5364.85	9426.83	8717.57	709.264	8.13602	0	6564	24	795	5199.3	9084.3	8442.29	642.007	7.60466	15.7407	-3.15777		0	6450	16	760	4889.84	8365.74	8194.58	171.156	2.08865	10.2247	-5.9992			DDR2	X	PYK	Protein kinase - Receptor-tyrosine kinase	Protein-tyrosine kinase	TK	DDR
592	293	PK594	DDR2 (Tyro10)	Y740	Discoidin domain-containing receptor 2	0	6158	24	743	4557.56	8008.31				0	6440	44	698	4464.41	7800.28							0	6625	29	711	4689.76	8023.43								DDR2	X	PYK	Protein kinase - Receptor-tyrosine kinase	Protein-tyrosine kinase	TK	DDR
593	294	PK590	DLK (ZPK)	S269	Mitogen-activated protein kinase kinase kinase 12	0	8108	18	877	7094.93	12466.8	12237.1	229.7	1.87707	0	8888	20	713	6322.88	11047.4	11286.3	238.881	2.11655	3.99362	-7.76992		0	7896	24	789	6211.01	10626	10679.1	53.0121	0.496412	2.37348	-12.7323			DLK	X	PSTK	Protein kinase - Non-receptor protein-serine/threonine	Protein-serine/threonine kinase	TKL	MLK	LZK
594	294	PK590	DLK (ZPK)	S269	Mitogen-activated protein kinase kinase kinase 12	0	7468	16	917	6833.48	12007.4				0	8464	18	781	6596.33	11525.2							0	7270	18	865	6272.98	10732.1								DLK	X	PSTK	Protein kinase - Non-receptor protein-serine/threonine	Protein-serine/threonine kinase	TKL	MLK	LZK
595	295	NK264-1	DMPK1 (DMPK)	Pan-specific	Myotonic dystrophy protein kinase	0	4175	22	934	3878.9	6815.8	6941.33	125.528	1.80841	0	4608	20	861	3950.27	6901.97	7167.43	265.458	3.70367	5.51208	3.25726		0	4373	18	931	4054.51	6936.62	6867.83	68.7835	1.00153	2.80995	-1.05883			DMPK1	X	PSTK	Protein kinase - Non-receptor protein-serine/threonine	Protein-serine/threonine kinase	AGC	DMPK	GEK
596	295	NK264-1	DMPK1 (DMPK)	Pan-specific	Myotonic dystrophy protein kinase	0	4247	18	951	4021.78	7066.86				0	4429	16	964	4254.13	7432.88							0	4162	18	959	3974.1	6799.05								DMPK1	X	PSTK	Protein kinase - Non-receptor protein-serine/threonine	Protein-serine/threonine kinase	AGC	DMPK	GEK
597	296	NK265-1	DMPK2 (MRCK-g)	Pan-specific	Myotonic dystrophy protein kinase 2; Serine-threonine-protein kinase MRCK gamma	0	4760	18	689	3267.24	5741.02	6078.88	337.867	5.55804	0	5029	16	568	2847.38	4974.99	5442.2	467.211	8.58495	14.143	-10.4736		0	5016	16	692	3460	5919.51	6322.06	402.551	6.3674	11.9254	4.00037			DMPK2	X	PSTK	Protein kinase - Non-receptor protein-serine/threonine	Protein-serine/threonine kinase	AGC	DMPK	GEK
598	296	NK265-1	DMPK2 (MRCK-g)	Pan-specific	Myotonic dystrophy protein kinase 2; Serine-threonine-protein kinase MRCK gamma	0	5097	18	719	3651.8	6416.75				0	5104	18	665	3382.19	5909.41							0	5346	20	738	3930.59	6724.61								DMPK2	X	PSTK	Protein kinase - Non-receptor protein-serine/threonine	Protein-serine/threonine kinase	AGC	DMPK	GEK
599	297	NK048-4	DNAPK (PRKDC)	Pan-specific	DNA-dependent protein kinase catalytic subunit	0	6484	16	874	5653.03	9933.21	9723.19	210.015	2.15994	0	6362	12	749	4756.15	8310.02	8861.2	551.183	6.22019	8.38013	-8.86532		0	6676	22	858	5709.13	9767.42	10209	441.551	4.32513	6.48507	4.99607			DNAPK	X	PSTK	Protein kinase - Non-receptor protein-serine/threonine	Protein-serine/threonine kinase	Atypical	PIKK	DNAPK
600	297	NK048-4	DNAPK (PRKDC)	Pan-specific	DNA-dependent protein kinase catalytic subunit	0	6363	16	853	5413.99	9513.18				0	6530	16	827	5387.08	9412.38							0	6842	16	912	6225.31	10650.5								DNAPK	X	PSTK	Protein kinase - Non-receptor protein-serine/threonine	Protein-serine/threonine kinase	Atypical	PIKK	DNAPK
601	298	NK048-7	DNAPK (PRKDC)	Pan-specific	DNA-dependent protein kinase catalytic subunit	0	6952	20	870	6030.84	10597.1	10368.7	228.38	2.20259	0	7872	20	810	6360.12	11112.5	10105.1	1007.41	9.96933	12.1719	-2.5423		0	7296	22	852	6197.45	10602.9	10758.4	155.563	1.44597	3.64856	3.75864			DNAPK	X	PSTK	Protein kinase - Non-receptor protein-serine/threonine	Protein-serine/threonine kinase	Atypical	PIKK	DNAPK
602	298	NK048-7	DNAPK (PRKDC)	Pan-specific	DNA-dependent protein kinase catalytic subunit	0	6638	20	872	5770.9	10140.3				0	6730	20	776	5206.96	9097.68							0	7212	20	887	6379.3	10914								DNAPK	X	PSTK	Protein kinase - Non-receptor protein-serine/threonine	Protein-serine/threonine kinase	Atypical	PIKK	DNAPK
603	299	PK596	DNAPK (PRKDC)	Y883	DNA-dependent protein kinase catalytic subunit	0	6095	18	843	5122.91	9001.71	9067.04	65.3351	0.720578	0	6378	12	688	4379.81	7652.47	7641.02	11.4425	0.149751	0.870329	-15.7275		0	6732	16	881	5916.8	10122.7	10095.1	27.6061	0.273461	0.994039	11.3383			DNAPK	X	PSTK	Protein kinase - Non-receptor protein-serine/threonine	Protein-serine/threonine kinase	Atypical	PIKK	DNAPK
604	299	PK596	DNAPK (PRKDC)	Y883	DNA-dependent protein kinase catalytic subunit	0	6222	20	838	5197.28	9132.38				0	6006	16	729	4366.71	7629.58							0	6613	16	892	5884.52	10067.5								DNAPK	X	PSTK	Protein kinase - Non-receptor protein-serine/threonine	Protein-serine/threonine kinase	Atypical	PIKK	DNAPK
605	300	PK595	DNAPK (PRKDC)	T2609	DNA-dependent protein kinase catalytic subunit	0	2788	18	800	2216	3893.84	3809.3	84.5399	2.2193	0	2784	18	707	1955.56	3416.79	3848.64	431.857	11.221	13.4403	1.0329		0	2756	12	767	2104.65	3600.72	3776.38	175.662	4.65161	6.87091	-0.864107			DNAPK	X	PSTK	Protein kinase - Non-receptor protein-serine/threonine	Protein-serine/threonine kinase	Atypical	PIKK	DNAPK
606	300	PK595	DNAPK (PRKDC)	T2609	DNA-dependent protein kinase catalytic subunit	0	2508	20	852	2119.78	3724.76				0	2939	12	837	2449.9	4280.5							0	2764	14	840	2310	3952.04								DNAPK	X	PSTK	Protein kinase - Non-receptor protein-serine/threonine	Protein-serine/threonine kinase	Atypical	PIKK	DNAPK
607	301	PN746	DNMT3A	S105	DNA (cytosine-5)-methyltransferase 3A	0	5248	14	741	3878.39	6814.91	6987.34	172.432	2.46778	0	4719	16	630	2962.89	5176.81	5867.32	690.517	11.7689	14.2366	-16.0292		0	4794	14	740	3537.2	6051.59	6297.03	245.444	3.89777	6.36556	-9.87941						Methyltransferase
608	301	PN746	DNMT3A	S105	DNA (cytosine-5)-methyltransferase 3A	0	4949	16	826	4074.66	7159.77				0	5058	20	745	3753.31	6557.84							0	5452	20	704	3824.13	6542.48											Methyltransferase
609	302	PN508	Dok3	Y398	Docking protein 3	0	8456	22	945	7970.13	14004.7	13405.8	598.851	4.46709	0	8344	22	749	6233.18	10890.7	11722.2	831.522	7.09355	11.5606	-12.5588		0	8482	16	979	8288.21	14179.8	13479.9	699.873	5.19195	9.65905	0.552813
610	302	PN508	Dok3	Y398	Docking protein 3	0	7872	18	928	7288.51	12807				0	7937	24	908	7185	12553.7							0	8262	26	907	7470.05	12780.1
611	303	PN747	DPYD	S766+T768	Dihydropyrimidine dehydrogenase [NADP()]	0	14391	18	788	11325.9	19901.3	18279.3	1622	8.8734	0	13488	16	664	8945.41	15629.6	16758.2	1128.6	6.73465	15.608	-8.32176		0	13544	18	743	10049.8	17193.6	17290.7	97.0937	0.561536	9.43493	-5.40818
612	303	PN747	DPYD	S766+T768	Dihydropyrimidine dehydrogenase [NADP()]	0	13219	16	718	9479.75	16657.3				0	13030	22	787	10237.3	17886.8							0	13198	16	771	10163.3	17387.8
613	304	PN222	Dynamin I	S795	Dynamin-1	0	136	12	562	69.688	122.452	105.924	16.5277	15.6033	0	100	8	479	44.068	76.9963	86.8086	9.81236	11.3034	26.9068	-18.0466		0	126	12	537	61.218	104.734	132.886	28.1519	21.185	36.7883	25.4539
614	304	PN222	Dynamin I	S795	Dynamin-1	0	104	12	553	50.876	89.3966				0	110	10	553	55.3	96.621							0	164	16	636	94.128	161.038
615	305	PK597	DYRK1A	Y321	Dual specificity tyrosine-phosphorylation-regulated kinase 1A	0	2233	14	688	1526.67	2682.59	2913.49	230.903	7.92531	0	2068	14	603	1238.56	2164.03	2462.55	298.517	12.1223	20.0476	-15.4776		0	2312	18	655	1502.57	2570.66	2764.09	193.43	6.99798	14.9233	-5.1279			DYRK1A	X	PSTK	Protein Kinase - Dual specificity kinase	Protein-serine/threonine kinase	CMGC	DYRK	Dyrk1
616	305	PK597	DYRK1A	Y321	Dual specificity tyrosine-phosphorylation-regulated kinase 1A	0	2326	14	774	1789.49	3144.39				0	2220	16	717	1580.27	2761.07							0	2403	12	723	1728.69	2957.52								DYRK1A	X	PSTK	Protein Kinase - Dual specificity kinase	Protein-serine/threonine kinase	CMGC	DYRK	Dyrk1
617	306	NK266-1	DYRK2	Pan-specific	Dual specificity tyrosine-phosphorylation-regulated kinase 2	0	2746	14	812	2218.38	3898.03	3804.15	93.8721	2.46762	0	2899	18	715	2059.91	3599.11	3662.19	63.0788	1.72243	4.19005	-3.73174		0	2170	16	812	1749.05	2992.34	2746.67	245.677	8.94454	11.4122	-27.7982			DYRK2	X	PSTK	Protein kinase - Non-receptor protein-serine/threonine	Protein-serine/threonine kinase	CMGC	DYRK	Dyrk2
618	306	NK266-1	DYRK2	Pan-specific	Dual specificity tyrosine-phosphorylation-regulated kinase 2	0	2802	20	759	2111.54	3710.28				0	2864	40	755	2132.12	3725.27							0	2068	32	718	1461.85	2500.99								DYRK2	X	PSTK	Protein kinase - Non-receptor protein-serine/threonine	Protein-serine/threonine kinase	CMGC	DYRK	Dyrk2
619	307	PK598	DYRK2	Y382	Dual specificity tyrosine-phosphorylation-regulated kinase 2	0	1402	16	885	1226.61	2155.33	2071.38	83.9512	4.05291	0	1472	20	807	1171.76	2047.32	1992.82	54.5026	2.73495	6.78785	-3.79271		0	1456	18	900	1294.2	2214.17	2152.81	61.3593	2.85019	6.9031	3.93114			DYRK2	X	PSTK	Protein kinase - Non-receptor protein-serine/threonine	Protein-serine/threonine kinase	CMGC	DYRK	Dyrk2
620	307	PK598	DYRK2	Y382	Dual specificity tyrosine-phosphorylation-regulated kinase 2	0	1284	16	892	1131.06	1987.43				0	1304	20	864	1109.38	1938.32							0	1430	20	867	1222.47	2091.45								DYRK2	X	PSTK	Protein kinase - Non-receptor protein-serine/threonine	Protein-serine/threonine kinase	CMGC	DYRK	Dyrk2
621	308	NK374-1	DYRK3	Pan-specific	Dual specificity tyrosine-phosphorylation-regulated kinase 3	0	76	12	566	36.224	63.6509	59.7008	3.95007	6.61644	0	88	10	568	44.304	77.4086	76.5071	0.901563	1.17841	7.79484	28.1508		0	84	12	545	39.24	67.1334	65.8126	1.32077	2.00686	8.6233	10.2374			DYRK3	X	PSTK	Protein kinase - Non-receptor protein-serine/threonine	Protein-serine/threonine kinase	CMGC	DYRK	Dyrk2
622	308	NK374-1	DYRK3	Pan-specific	Dual specificity tyrosine-phosphorylation-regulated kinase 3	0	56	8	661	31.728	55.7508				0	88	16	601	43.272	75.6055							0	90	14	496	37.696	64.4919								DYRK3	X	PSTK	Protein kinase - Non-receptor protein-serine/threonine	Protein-serine/threonine kinase	CMGC	DYRK	Dyrk2
623	309	NK375-2	DYRK4	Pan-specific	Dual specificity tyrosine-phosphorylation-regulated kinase 4	0	492	12	612	293.76	516.179	493.723	22.4563	4.54837	0	503	12	567	278.397	486.419	506.021	19.6011	3.87358	8.42195	2.49076		0	572	16	630	350.28	599.274	621.75	22.4762	3.61499	8.16335	25.9308			DYRK4	X	PSTK	Protein kinase - Non-receptor protein-serine/threonine	Protein-serine/threonine kinase	CMGC	DYRK	Dyrk2
624	309	NK375-2	DYRK4	Pan-specific	Dual specificity tyrosine-phosphorylation-regulated kinase 4	0	462	12	596	268.2	471.267				0	502	16	619	300.834	525.622							0	605	12	635	376.555	644.226								DYRK4	X	PSTK	Protein kinase - Non-receptor protein-serine/threonine	Protein-serine/threonine kinase	CMGC	DYRK	Dyrk2
625	310	NK375-1	DYRK4	Pan-specific	Dual specificity tyrosine-phosphorylation-regulated kinase 4	0	210	10	662	132.4	232.646	267.325	34.6791	12.9726	0	198	14	526	96.784	169.102	150.979	18.1239	12.0043	24.9769	-43.5225		0	260	14	636	156.456	267.671	273.269	5.59787	2.04848	15.0211	2.2235			DYRK4	X	PSTK	Protein kinase - Non-receptor protein-serine/threonine	Protein-serine/threonine kinase	CMGC	DYRK	Dyrk2
626	310	NK375-1	DYRK4	Pan-specific	Dual specificity tyrosine-phosphorylation-regulated kinase 4	0	272	10	656	171.872	302.004				0	150	12	551	76.038	132.855							0	264	14	652	163	278.867								DYRK4	X	PSTK	Protein kinase - Non-receptor protein-serine/threonine	Protein-serine/threonine kinase	CMGC	DYRK	Dyrk2
627	311	PN509	EEF1A1	Y141	Eukaryotic elongation factor 1-alpha 1	0	5578	24	858	4765.33	8373.39	9020.25	646.862	7.17122	0	6521	20	747	4856.25	8484.91	9367.82	882.911	9.42493	16.5962	3.8532		0	6414	22	845	5401.24	9240.67	9468.94	228.274	2.41077	9.58199	4.97424			EEF1A1
628	311	PN509	EEF1A1	Y141	Eukaryotic elongation factor 1-alpha 1	0	5917	14	932	5501.6	9667.11				0	6409	25	919	5866.9	10250.7							0	6348	22	896	5668.1	9697.21								EEF1A1
629	312	PN555	EEF2	T57	Eukaryotic elongation factor 2	0	9369	18	807	7546.26	13259.9	13047.2	212.717	1.63037	0	10369	20	743	7689.31	13434.9	13642.5	207.61	1.52179	3.15216	4.56282		0	10621	21	815	8639	14780	15050.2	270.191	1.79527	3.42564	15.3519
630	312	PN555	EEF2	T57	Eukaryotic elongation factor 2	0	9546	23	767	7304.14	12834.4				0	10224	22	777	7926.95	13850.1							0	10826	24	829	8954.86	15320.3
631	313	PK180	eEF2K	S366	Eukaryotic elongation factor 2 kinase	0	862	16	644	544.824	957.336	916.566	40.7693	4.44805	0	586	14	477	272.844	476.717	705.945	229.228	32.471	36.9191	-22.9794		0	902	12	651	579.39	991.244	917.621	73.6235	8.0233	12.4714	0.115041			eEF2K	X	PSTK	Protein kinase - Non-receptor protein-serine/threonine	Protein-serine/threonine kinase	Atypical	Alpha	eEF2K
632	313	PK180	eEF2K	S366	Eukaryotic elongation factor 2 kinase	0	794	14	639	498.42	875.797				0	890	14	611	535.236	935.172							0	881	14	569	493.323	843.997								eEF2K	X	PSTK	Protein kinase - Non-receptor protein-serine/threonine	Protein-serine/threonine kinase	Atypical	Alpha	eEF2K
633	314	NK052-6	EGFR (ErbB1)	Pan-specific	Epidermal growth factor receptor-tyrosine kinase	0	16770	20	971	16264.2	28578.7	28400.9	177.768	0.625923	0	16444	16	937	15393	26894.9	27679.5	784.559	2.83444	3.46036	-2.54007		0	16612	18	1013	16809.7	28758.8	27798	960.773	3.45627	4.08219	-2.12286			EGFR	X	PYK	Protein kinase - Receptor-tyrosine kinase	Protein-tyrosine kinase	TK	EGFR
634	314	NK052-6	EGFR (ErbB1)	Pan-specific	Epidermal growth factor receptor-tyrosine kinase	0	16394	21	981	16061.9	28223.1				0	16578	22	984	16291.1	28464.1							0	15732	14	998	15686.6	26837.2								EGFR	X	PYK	Protein kinase - Receptor-tyrosine kinase	Protein-tyrosine kinase	TK	EGFR
635	315	NK052-4	EGFR (ErbB1)	Pan-specific	Epidermal growth factor receptor-tyrosine kinase	0	6324	14	924	5830.44	10244.9	9820.45	424.488	4.32249	0	6214	16	802	4970.8	8685.05	9408.97	723.918	7.69392	12.0164	-4.19006		0	6392	16	915	5834.04	9981.12	9950.81	30.3024	0.304522	4.62701	1.32747			EGFR	X	PYK	Protein kinase - Receptor-tyrosine kinase	Protein-tyrosine kinase	TK	EGFR
636	315	NK052-4	EGFR (ErbB1)	Pan-specific	Epidermal growth factor receptor-tyrosine kinase	0	6002	14	893	5347.28	9395.96				0	6166	16	943	5799.45	10132.9							0	6310	14	921	5798.62	9920.51								EGFR	X	PYK	Protein kinase - Receptor-tyrosine kinase	Protein-tyrosine kinase	TK	EGFR
637	338	NK052-5	EGFR (ErbB1)	Pan-specific	Epidermal growth factor receptor-tyrosine kinase	0	13595	26	1024	13894.7	24415	25068.2	653.237	2.60584	0	13554	22	948	12828.3	22413.9	24926.5	2512.63	10.0802	12.686	-0.565241		0	13655	31	1087	14809.3	25336.3	25165.2	171.147	0.680096	3.28594	0.386972			EGFR	X	PYK	Protein kinase - Receptor-tyrosine kinase	Protein-tyrosine kinase	TK	EGFR
638	338	NK052-5	EGFR (ErbB1)	Pan-specific	Epidermal growth factor receptor-tyrosine kinase	0	13180	28	1113	14638.2	25721.4				0	14368	26	1095	15704.5	27439.1							0	13279	22	1102	14609.2	24994								EGFR	X	PYK	Protein kinase - Receptor-tyrosine kinase	Protein-tyrosine kinase	TK	EGFR
639	316	PK602	EGFR (ErbB1)	Y869	Epidermal growth factor receptor-tyrosine kinase	0	6895	16	886	6094.79	10709.4	10514.5	194.913	1.85375	0	6948	18	829	5744.97	10037.7	10589.6	551.884	5.21158	7.06533	0.713751		0	7240	16	899	6494.38	11110.8	10723.3	387.588	3.61446	5.46821	1.9851			EGFR	X	PYK	Protein kinase - Receptor-tyrosine kinase	Protein-tyrosine kinase	TK	EGFR
640	316	PK602	EGFR (ErbB1)	Y869	Epidermal growth factor receptor-tyrosine kinase	0	6709	20	878	5872.94	10319.6				0	6860	40	935	6376.7	11141.5							0	6964	20	870	6041.28	10335.7								EGFR	X	PYK	Protein kinase - Receptor-tyrosine kinase	Protein-tyrosine kinase	TK	EGFR
641	317	PK603	EGFR (ErbB1)	Y998	Epidermal growth factor receptor-tyrosine kinase	0	6310	16	884	5563.9	9776.58	9976.08	199.492	1.99971	0	6336	18	752	4751.14	8301.26	8934.82	633.566	7.09098	9.09069	-10.4375		0	6887	20	903	6200.9	10608.8	10221.9	386.856	3.78458	5.78429	2.46416			EGFR	X	PYK	Protein kinase - Receptor-tyrosine kinase	Protein-tyrosine kinase	TK	EGFR
642	317	PK603	EGFR (ErbB1)	Y998	Epidermal growth factor receptor-tyrosine kinase	0	6142	14	945	5790.96	10175.6				0	6220	18	883	5476.37	9568.39							0	6560	20	879	5748.66	9835.05								EGFR	X	PYK	Protein kinase - Receptor-tyrosine kinase	Protein-tyrosine kinase	TK	EGFR
643	318	PK599	EGFR (ErbB1)	Y1069	Epidermal growth factor receptor-tyrosine kinase	0	5888	14	786	4616.96	8112.68	8087.92	24.7652	0.3062	0	6124	18	792	4835.95	8449.45	8499.09	49.6384	0.584044	0.890244	5.08373		0	6208	18	823	5094.37	8715.66	8573.98	141.682	1.65246	1.95866	6.00969			EGFR	X	PYK	Protein kinase - Receptor-tyrosine kinase	Protein-tyrosine kinase	TK	EGFR
644	318	PK599	EGFR (ErbB1)	Y1069	Epidermal growth factor receptor-tyrosine kinase	0	5884	16	782	4588.78	8063.15				0	5822	18	843	4892.77	8548.73							0	6032	14	819	4928.74	8432.3								EGFR	X	PYK	Protein kinase - Receptor-tyrosine kinase	Protein-tyrosine kinase	TK	EGFR
645	319	PK600	EGFR (ErbB1)	Y1110	Epidermal growth factor receptor-tyrosine kinase	0	666	12	606	396.324	696.399	687.482	8.91752	1.29713	0	642	14	464	291.392	509.125	556.501	47.3766	8.5133	9.81043	-19.0523		0	730	14	601	430.316	736.202	729.465	6.73729	0.923594	2.22072	6.1068			EGFR	X	PYK	Protein kinase - Receptor-tyrosine kinase	Protein-tyrosine kinase	TK	EGFR
646	319	PK600	EGFR (ErbB1)	Y1110	Epidermal growth factor receptor-tyrosine kinase	0	675	16	586	386.174	678.564				0	617	18	577	345.623	603.878							0	734	18	590	422.44	722.728								EGFR	X	PYK	Protein kinase - Receptor-tyrosine kinase	Protein-tyrosine kinase	TK	EGFR
647	320	PK601	EGFR (ErbB1)	Y1172	Epidermal growth factor receptor-tyrosine kinase	0	4666	16	791	3678.15	6463.05	6370.12	92.9267	1.45879	0	4920	20	774	3792.6	6626.49	6937.31	310.819	4.4804	5.93919	8.90382		0	5107	18	765	3893.09	6660.45	6328.35	332.104	5.24788	6.70667	-0.655818			EGFR	X	PYK	Protein kinase - Receptor-tyrosine kinase	Protein-tyrosine kinase	TK	EGFR
648	320	PK601	EGFR (ErbB1)	Y1172	Epidermal growth factor receptor-tyrosine kinase	0	4536	14	790	3572.38	6277.2				0	4887	18	852	4148.39	7248.13							0	4791	16	734	3504.85	5996.24								EGFR	X	PYK	Protein kinase - Receptor-tyrosine kinase	Protein-tyrosine kinase	TK	EGFR
649	321	PK010	EGFR (ErbB1)	Y1172	Epidermal growth factor receptor-tyrosine kinase	0	652	12	328	209.92	368.86	465.798	96.9374	20.8111	0	859	12	336	284.592	497.243	383.665	113.579	29.6036	50.4146	-17.6327		0	706	12	347	240.818	412.001	232.895	179.106	76.9043	97.7153	-50.0008			EGFR	X	PYK	Protein kinase - Receptor-tyrosine kinase	Protein-tyrosine kinase	TK	EGFR
650	321	PK010	EGFR (ErbB1)	Y1172	Epidermal growth factor receptor-tyrosine kinase	0	861	16	379	320.255	562.735				0	447	14	357	154.581	270.086							0	62	14	655	31.44	53.7889								EGFR	X	PYK	Protein kinase - Receptor-tyrosine kinase	Protein-tyrosine kinase	TK	EGFR
651	322	NN038-1	eIF2a	Pan-specific	Eukaryotic translation initiation factor 2 alpha	0	587	8	304	176.016	309.286	323.872	14.5861	4.50365	0	830	10	305	250.1	436.979	414.563	22.415	5.4069	9.91055	28.0022		0	532	14	329	170.422	291.565	184.944	106.621	57.6507	62.1544	-42.8961
652	322	NN038-1	eIF2a	Pan-specific	Eukaryotic translation initiation factor 2 alpha	0	532	10	369	192.618	338.458				0	678	12	337	224.442	392.148							0	80	10	654	45.78	78.3223
653	323	PN028-1	eIF2a	S52	Eukaryotic translation initiation factor 2 alpha	0	1022	12	372	375.72	660.195	609.502	50.6928	8.31708	0	854	12	372	313.224	547.27	574.407	27.1377	4.72448	13.0416	-5.75797		0	931	14	410	375.97	643.225	616.969	26.2563	4.25569	12.5728	1.22499
654	323	PN028-1	eIF2a	S52	Eukaryotic translation initiation factor 2 alpha	0	771	12	419	318.021	558.81				0	940	12	371	344.288	601.545							0	846	12	414	345.276	590.712
655	324	PK604	EIF2AK3 (PERK)	T982	Eukaryotic translation initiation factor 2-alpha kinase 3	0	7762	16	878	6800.99	11950.3	11680.4	269.953	2.31117	0	8100	18	818	6611.08	11551	11540.3	10.6248	0.0920667	2.40323	-1.19889		0	8406	18	863	7238.84	12384.5	11845.8	538.739	4.54794	6.85911	1.41599			PERK	X	PSTK	Protein kinase - Non-receptor protein-serine/threonine	Protein-serine/threonine kinase	Other	PEK	PEK
656	324	PK604	EIF2AK3 (PERK)	T982	Eukaryotic translation initiation factor 2-alpha kinase 3	0	7615	20	855	6493.73	11410.4				0	8011	22	826	6598.91	11529.7							0	8232	22	805	6609.05	11307								PERK	X	PSTK	Protein kinase - Non-receptor protein-serine/threonine	Protein-serine/threonine kinase	Other	PEK	PEK
657	325	NN407-1	eIF4B	Pan-specific	Eukaryotic translation initiation factor 4B	0	262	18	651	158.844	279.112	341.101	61.9886	18.1731	0	300	16	585	166.14	290.282	304.347	14.0651	4.62139	22.7945	-10.775		0	326	22	659	200.336	342.743	347.93	5.18727	1.49089	19.664	2.0022
658	325	NN407-1	eIF4B	Pan-specific	Eukaryotic translation initiation factor 4B	0	314	18	775	229.4	403.089				0	282	14	680	182.24	318.412							0	318	18	688	206.4	353.118
659	326	PN172	eIF4B	S422	Eukaryotic translation initiation factor 4B	0	1014	18	663	660.348	1160.33	798.365	361.963	45.3381	0	1222	18	330	397.32	694.204	621.659	72.5444	11.6695	57.0076	-22.1335		0	1468	16	580	842.16	1440.8	1132.93	307.869	27.1745	72.5126	41.9066
660	326	PN172	eIF4B	S422	Eukaryotic translation initiation factor 4B	0	799	18	318	248.358	436.401				0	889	16	360	314.28	549.115							0	834	18	591	482.256	825.064
661	327	NN039-3	eIF4E	Pan-specific	Eukaryotic translation initiation factor 4 (mRNA cap binding protein)	0	598	12	765	448.29	787.711	666.879	120.832	18.119	0	344	12	624	207.168	361.967	490.677	128.71	26.2312	44.3502	-26.4219		0	806	14	789	624.888	1069.08	1062.49	6.597	0.620902	18.7399	59.3222	Possible
662	327	NN039-3	eIF4E	Pan-specific	Eukaryotic translation initiation factor 4 (mRNA cap binding protein)	0	467	14	686	310.758	546.047				0	518	18	709	354.5	619.388							0	870	14	721	617.176	1055.89
663	328	PN030-2	eIF4E	S209	Eukaryotic translation initiation factor 4 (mRNA cap binding protein)	0	226	12	310	66.34	116.569	181.065	64.4961	35.6204	0	391	14	276	104.052	181.801	268.231	86.4295	32.2221	67.8424	48.1404		0	690	14	421	284.596	486.899	474.399	12.4994	2.63479	38.2551	162.005
664	328	PN030-2	eIF4E	S209	Eukaryotic translation initiation factor 4 (mRNA cap binding protein)	0	262	12	559	139.75	245.561				0	392	14	537	202.986	354.66							0	586	14	472	269.984	461.9
665	329	NN408-1	eIF4G (eIF4G1)	Pan-specific	Eukaryotic translation initiation factor 4 gamma 1	0	248	12	707	166.852	293.183	269.416	23.7672	8.82173	0	202	12	572	108.68	189.887	197.386	7.49905	3.79917	12.6209	-26.7355		0	292	18	693	189.882	324.858	344.723	19.8646	5.76248	14.5842	27.9516
666	329	NN408-1	eIF4G (eIF4G1)	Pan-specific	Eukaryotic translation initiation factor 4 gamma 1	0	214	14	699	139.8	245.649				0	194	26	698	117.264	204.885							0	318	14	701	213.104	364.587
667	330	PN031	eIF4G (eIF4G1)	S1106	Eukaryotic translation initiation factor 4 gamma 1	0	312	10	474	143.148	251.532	262.957	11.425	4.3448	0	324	12	448	139.776	244.219	366.178	121.959	33.306	37.6508	39.2539		0	368	12	507	180.492	308.793	332.789	23.9963	7.21064	11.5554	26.5566
668	330	PN031	eIF4G (eIF4G1)	S1106	Eukaryotic translation initiation factor 4 gamma 1	0	310	12	524	156.152	274.382				0	474	16	610	279.38	488.137							0	404	12	532	208.544	356.786
669	331	PN193	eIF4G (eIF4G1)	S1231	Eukaryotic translation initiation factor 4 gamma 1	0	2514	15	344	859.656	1510.54	2061.13	550.586	26.7129	0	1595	14	537	848.997	1483.38	1704.52	221.139	12.9737	39.6865	-17.3016		0	2326	18	552	1274.02	2179.64	2276.6	96.9568	4.25885	30.9717	10.4539
670	331	PN193	eIF4G (eIF4G1)	S1231	Eukaryotic translation initiation factor 4 gamma 1	0	2485	16	602	1486.34	2611.71				0	1815	20	614	1102.13	1925.66							0	2690	22	520	1387.36	2373.55
671	332	PN581	Elk-1	S324	ETS domain-containing protein Elk-1	0	11074	12	942	10420.4	18310.2	16141.3	2168.85	13.4366	0	11323	20	910	10285.7	17971.4	18320.7	349.363	1.90692	15.3435	13.5021		0	10546	18	922	9706.82	16606.8	15958.8	648.067	4.06088	17.4975	-1.1311						Transcription protein					X
672	332	PN581	Elk-1	S324	ETS domain-containing protein Elk-1	0	8718	18	914	7951.8	13972.5				0	11982	16	893	10685.6	18670.1							0	10236	20	876	8949.22	15310.7											Transcription protein					X
673	333	PN223	Elk-1	S383	ETS domain-containing protein Elk-1	0	144	15	664	85.656	150.51	173.341	22.8306	13.1709	0	154	18	717	97.512	170.374	179.118	8.74306	4.88119	18.0521	3.33258		0	172	16	734	114.504	195.898	208.388	12.49	5.99362	19.1646	20.2188						Transcription protein					X
674	333	PN223	Elk-1	S383	ETS domain-containing protein Elk-1	0	154	16	809	111.642	196.171				0	142	14	840	107.52	187.861							0	187	16	755	129.105	220.878											Transcription protein					X
675	334	PN510	EML4	Y226	Echinoderm microtubule-associated protein-like 4	0	6494	14	953	6175.44	10851.2	10817.9	33.3023	0.307846	0	6451	18	1000	6433	11239.8	11540.2	300.32	2.60239	2.91024	6.67695		0	5782	18	955	5504.62	9417.53	9450.82	33.2913	0.352258	0.660104	-12.6368			EML4
676	334	PN510	EML4	Y226	Echinoderm microtubule-associated protein-like 4	0	6251	20	985	6137.53	10784.6				0	6788	18	1001	6776.77	11840.5							0	6026	20	923	5543.54	9484.11								EML4
677	350	NN410-1	ENFB2	Pan-specific	Ephrin-B2	0	115	10	469	49.245	86.5307	74.5109	12.0198	16.1315	0	110	8	490	49.98	87.3258	88.8406	1.51484	1.70512	17.8367	19.2317		0	116	8	555	59.94	102.548	90.4351	12.1128	13.3939	29.5254	21.3715
678	350	NN410-1	ENFB2	Pan-specific	Ephrin-B2	0	78	10	523	35.564	62.4912				0	110	8	507	51.714	90.3555							0	92	8	545	45.78	78.3223
679	351	PN173	ENFB2	Y316	Ephrin-B2	0	1304	12	245	316.54	556.207	501.845	54.3626	10.8326	0	1396	12	254	351.536	614.209	521.138	93.0707	17.8591	28.6917	3.84456		0	1240	10	276	339.48	580.796	519.514	61.2823	11.7961	22.6286	3.5209
680	351	PN173	ENFB2	Y316	Ephrin-B2	0	1060	12	243	254.664	447.482				0	994	14	250	245	428.068							0	944	14	288	267.84	458.232
681	335	PN511	ENO1	Y44	Alpha-enolase	0	6095	18	954	5797.46	10187	9734.01	452.975	4.65353	0	6206	20	882	5456.05	9532.9	10004.9	472.023	4.71791	9.37144	2.78312		0	6642	20	937	6204.81	10615.5	10295.5	320.001	3.10818	7.76171	5.76783			ENO1
682	335	PN511	ENO1	Y44	Alpha-enolase	0	5653	22	938	5281.88	9281.04				0	6225	24	967	5996.37	10476.9							0	6346	22	922	5830.73	9975.45								ENO1
683	336	PN512	ENO2	Y25	Gamma-enolase	0	6340	12	881	5574.97	9796.04	9757.71	38.3269	0.392786	0	7886	18	807	6349.48	11093.9	11688.6	594.675	5.08766	5.48045	19.7881		0	7081	14	840	5936.28	10156	10184.7	28.6566	0.281369	0.674155	4.37581			ENO2
684	336	PN512	ENO2	Y25	Gamma-enolase	0	6054	22	917	5531.34	9719.38				0	8136	18	866	7030.19	12283.3							0	7108	18	842	5969.78	10213.3								ENO2
685	337	PN748	EP300 (p300)	S2279	Histone acetyltransferase p300	0	3763	20	741	2773.56	4873.56	5242.56	369.005	7.03864	0	3595	18	708	2532.52	4424.85	5284.1	859.252	16.2611	23.2997	0.792359		0	4403	19	823	3608.03	6172.77	6130.7	42.0662	0.686156	7.7248	16.941						Histone acetyltransferase and transcriptional co-activator					X
686	337	PN748	EP300 (p300)	S2279	Histone acetyltransferase p300	0	3786	20	848	3193.57	5611.57				0	4120	22	858	3516.08	6143.36							0	4339	20	824	3558.86	6088.64											Histone acetyltransferase and transcriptional co-activator					X
687	339	PK605	EphA1	Y781	Ephrin type-A receptor 1 protein-tyrosine kinase	0	7896	22	768	6047.23	10625.9	10872.7	246.833	2.27021	0	8823	18	753	6630.16	11584.3	10678.7	905.605	8.48047	10.7507	-1.78418		0	8334	16	820	6820.76	11669.2	10895.7	773.514	7.09924	9.36946	0.211686			EPHA1	X	PYK	Protein kinase - Receptor-tyrosine kinase	Protein-tyrosine kinase	TK	Eph
688	339	PK605	EphA1	Y781	Ephrin type-A receptor 1 protein-tyrosine kinase	0	7960	20	797	6328.18	11119.5				0	7716	22	727	5593.54	9773.11							0	7756	22	765	5916.51	10122.2								EPHA1	X	PYK	Protein kinase - Receptor-tyrosine kinase	Protein-tyrosine kinase	TK	Eph
689	340	PK606	EphA2	Y588	Ephrin type-A receptor 2 protein-tyrosine kinase	0	5119	20	694	3538.71	6218.03	6491.64	273.611	4.21482	0	5404	16	701	3776.99	6599.21	6667.87	68.6586	1.02969	5.24451	2.71476		0	5120	18	765	3903.03	6677.47	7766.7	1089.23	14.0244	18.2392	19.6416			EPHA2	X	PYK	Protein kinase - Receptor-tyrosine kinase	Protein-tyrosine kinase	TK	Eph
690	340	PK606	EphA2	Y588	Ephrin type-A receptor 2 protein-tyrosine kinase	0	5606	18	689	3850.13	6765.25				0	5284	24	733	3855.58	6736.53							0	6831	20	760	5176.36	8855.93								EPHA2	X	PYK	Protein kinase - Receptor-tyrosine kinase	Protein-tyrosine kinase	TK	Eph
691	341	PK607	EphA2	Y772	Ephrin type-A receptor 2 protein-tyrosine kinase	0	660	16	439	282.716	496.774	509.334	12.5601	2.46598	0	506	16	436	213.64	373.275	443.389	70.114	15.8132	18.2792	-12.9472		0	894	18	473	414.348	708.884	692.573	16.3112	2.35516	4.82114	35.9762			EPHA2	X	PYK	Protein kinase - Receptor-tyrosine kinase	Protein-tyrosine kinase	TK	Eph
692	341	PK607	EphA2	Y772	Ephrin type-A receptor 2 protein-tyrosine kinase	0	650	14	467	297.012	521.894				0	689	18	438	293.898	513.503							0	826	16	488	395.28	676.261								EPHA2	X	PYK	Protein kinase - Receptor-tyrosine kinase	Protein-tyrosine kinase	TK	Eph
693	342	PK608	EphA3	Y779	Ephrin type-A receptor 3 protein-tyrosine kinase	0	10010	22	642	6412.3	11267.3	10974.2	293.167	2.67142	0	9706	16	593	5746.17	10039.8	10476	436.163	4.16346	6.83489	-4.53994		0	11110	18	678	7520.38	12866.2	13166.5	300.28	2.28065	4.95207	19.9766			EPHA3	X	PYK	Protein kinase - Receptor-tyrosine kinase	Protein-tyrosine kinase	TK	Eph
694	342	PK608	EphA3	Y779	Ephrin type-A receptor 3 protein-tyrosine kinase	0	9775	18	623	6078.61	10681				0	10328	22	606	6245.44	10912.1							0	11718	22	673	7871.41	13466.7								EPHA3	X	PYK	Protein kinase - Receptor-tyrosine kinase	Protein-tyrosine kinase	TK	Eph
695	343	NK376-1	EphA4	Pan-specific	Ephrin type-A receptor 4 protein-tyrosine kinase	0	347	14	413	137.529	241.659	267.586	25.9276	9.68943	0	398	10	402	155.976	272.524	260.104	12.4192	4.7747	14.4641	-2.79604		0	490	10	565	271.2	463.98	445.657	18.3231	4.11148	13.8009	66.5471			EPHA4	X	PYK	Protein kinase - Receptor-tyrosine kinase	Protein-tyrosine kinase	TK	Eph
696	343	NK376-1	EphA4	Pan-specific	Ephrin type-A receptor 4 protein-tyrosine kinase	0	372	12	464	167.04	293.514				0	338	18	443	141.76	247.685							0	474	14	543	249.78	427.334								EPHA4	X	PYK	Protein kinase - Receptor-tyrosine kinase	Protein-tyrosine kinase	TK	Eph
697	344	PK609	EphB1	Y594	Ephrin type-B receptor 1 protein-tyrosine kinase	0	5484	18	577	3153.88	5541.83	6098.22	556.388	9.12378	0	6021	14	574	3448.02	6024.43	6319.67	295.244	4.67183	13.7956	3.63141		0	6362	16	633	4017.02	6872.48	7044.82	172.335	2.44626	11.57	15.5224			EPHB1	X	PYK	Protein kinase - Receptor protein-tyrosine	Protein-tyrosine kinase	TK	Eph
698	344	PK609	EphB1	Y594	Ephrin type-B receptor 1 protein-tyrosine kinase	0	6510	14	583	3787.17	6654.61				0	6315	26	602	3785.98	6614.92							0	6822	18	620	4218.48	7217.15								EPHB1	X	PYK	Protein kinase - Receptor protein-tyrosine	Protein-tyrosine kinase	TK	Eph
699	345	NK267-1	EphB2	Pan-specific	Ephrin type-B receptor 2 protein-tyrosine kinase	0	2032	14	930	1876.74	3297.71	11167.2	7869.45	70.4696	0	14847	14	683	10130.9	17700.9	19253.8	1552.88	8.06532	78.5349	72.4145		0	14594	16	717	10452.4	17882.4	19296.4	1413.94	7.32748	77.7971	72.7957			EPHB2	X	PYK	Protein kinase - Receptor-tyrosine kinase	Protein-tyrosine kinase	TK	Eph
700	345	NK267-1	EphB2	Pan-specific	Ephrin type-B receptor 2 protein-tyrosine kinase	0	16285	18	666	10833.8	19036.6				0	16337	24	730	11908.5	20806.7							0	16249	22	746	12105.3	20710.3								EPHB2	X	PYK	Protein kinase - Receptor-tyrosine kinase	Protein-tyrosine kinase	TK	Eph
701	346	NK267-2	EphB2	Pan-specific	Ephrin type-B receptor 2 protein-tyrosine kinase	0	8404	16	667	5594.8	9830.88	9567.79	263.084	2.74968	0	9186	14	644	5906.77	10320.4	10423.9	103.555	0.993432	3.74311	8.94829		0	8545	16	710	6055.59	10360.2	10726.1	365.973	3.41198	6.16165	12.1066			EPHB2	X	PYK	Protein kinase - Receptor-tyrosine kinase	Protein-tyrosine kinase	TK	Eph
702	346	NK267-2	EphB2	Pan-specific	Ephrin type-B receptor 2 protein-tyrosine kinase	0	8408	16	631	5295.35	9304.71				0	8447	20	715	6025.31	10527.5							0	8746	20	743	6483.42	11092.1								EPHB2	X	PYK	Protein kinase - Receptor-tyrosine kinase	Protein-tyrosine kinase	TK	Eph
703	347	PK610	EphB2	Y780	Ephrin type-B receptor 2 protein-tyrosine kinase	0	728	14	472	337.008	592.173	736.392	144.22	19.5846	0	502	14	459	223.992	391.362	636.192	244.829	38.4836	58.0682	-13.607		0	1180	14	548	638.968	1093.17	1155.01	61.8401	5.35406	24.9387	56.8475	Possible		EPHB2	X	PYK	Protein kinase - Receptor-tyrosine kinase	Protein-tyrosine kinase	TK	Eph
704	347	PK610	EphB2	Y780	Ephrin type-B receptor 2 protein-tyrosine kinase	0	950	15	536	501.16	880.612				0	957	18	537	504.243	881.021							0	1234	14	583	711.26	1216.85								EPHB2	X	PYK	Protein kinase - Receptor-tyrosine kinase	Protein-tyrosine kinase	TK	Eph
705	348	PK611	EphB3	Y600	Ephrin type-B receptor 3 protein-tyrosine kinase	0	1234	14	515	628.3	1104.02	1080.52	23.5001	2.1749	0	882	16	499	432.134	755.031	921.584	166.553	18.0725	20.2474	-14.7088		0	1830	14	600	1089.6	1864.13	1721.08	143.057	8.31208	10.487	59.2829	Possible		EPHB3	X	PYK	Protein kinase - Receptor-tyrosine kinase	Protein-tyrosine kinase	TK	Eph
706	348	PK611	EphB3	Y600	Ephrin type-B receptor 3 protein-tyrosine kinase	0	1162	14	524	601.552	1057.02				0	1198	14	526	622.784	1088.14							0	1592	18	586	922.364	1578.02								EPHB3	X	PYK	Protein kinase - Receptor-tyrosine kinase	Protein-tyrosine kinase	TK	Eph
707	349	PK612	EphB4	Y596	Ephrin type-B receptor 4 protein-tyrosine kinase	0	4931	18	764	3753.53	6595.51	6632.74	37.2322	0.56134	0	5037	16	743	3730.6	6518.17	6507.55	10.617	0.163148	0.724488	-1.88746		0	5368	16	814	4356.53	7453.33	7525.84	72.5123	0.963511	1.52485	13.465			EPHB4	X	PYK	Protein kinase - Non-receptor protein-tyrosine	Protein-tyrosine kinase	TK	Eph
708	349	PK612	EphB4	Y596	Ephrin type-B receptor 4 protein-tyrosine kinase	0	4564	18	835	3795.91	6669.97				0	4820	22	775	3718.45	6496.93							0	5546	22	804	4441.3	7598.35								EPHB4	X	PYK	Protein kinase - Non-receptor protein-tyrosine	Protein-tyrosine kinase	TK	Eph
709	352	NN411-1	ERa (ESR1)	Pan-specific	Estrogen receptor	0	124	16	551	59.508	104.564	99.6478	4.9165	4.93387	0	170	18	538	81.776	142.88	110.955	31.9251	28.773	33.7069	11.3473		0	152	20	589	77.748	133.014	112.192	20.8227	18.5599	23.4937	12.5884						Transcription protein (receptor)					X
710	352	NN411-1	ERa (ESR1)	Pan-specific	Estrogen receptor	0	108	16	586	53.912	94.7313				0	100	12	514	45.232	79.03							0	98	12	621	53.406	91.3692											Transcription protein (receptor)					X
711	353	PN198	ERa (ESR1)	S104	Estrogen receptor	0	2367	12	401	944.355	1659.37	1558.9	100.469	6.44488	0	3590	14	330	1180.08	2061.85	1768.34	293.518	16.5986	23.0434	13.4347		0	2547	16	425	1075.67	1840.31	926.279	914.03	98.6775	105.122	-40.5813						Transcription protein (receptor)					X
712	353	PN198	ERa (ESR1)	S104	Estrogen receptor	1	2087	12	400	830	1458.43				1	2412	14	352	844.096	1474.82							1	12	2	716	7.16	12.2496											Transcription protein (receptor)					X
713	354	PN583	ERa (ESR1)	S167	Estrogen receptor	0	10530	17	658	6917.55	12155.2	12285.9	130.7	1.06383	0	10480	20	669	6997.74	12226.6	12368.4	141.828	1.1467	2.21053	0.671724		0	10946	18	730	7977.44	13648.1	13659.4	11.2916	0.0826649	1.14649	11.1801						Transcription protein (receptor)					X
714	354	PN583	ERa (ESR1)	S167	Estrogen receptor	0	10364	18	683	7066.32	12416.6				0	10408	16	689	7160.09	12510.2							0	10660	20	751	7990.64	13670.7											Transcription protein (receptor)					X
715	355	NK054-4	ErbB2 (HER2, Neu)	Pan-specific	ErbB2 (Neu) receptor-tyrosine kinase	0	6514	12	698	4538.4	7974.63	7730.09	244.539	3.16346	0	2152	18	920	1963.28	3430.27	5287.27	1857	35.1221	38.2855	-31.6014		0	6915	14	722	4982.52	8524.3	8850.81	326.509	3.68903	6.85249	14.4982			ERBB2	X	PYK	Protein kinase - Receptor-tyrosine kinase	Protein-tyrosine kinase	TK	EGFR
716	355	NK054-4	ErbB2 (HER2, Neu)	Pan-specific	ErbB2 (Neu) receptor-tyrosine kinase	0	6190	16	690	4260.06	7485.55				0	6202	16	661	4088.95	7144.27							0	6789	16	792	5364.22	9177.32								ERBB2	X	PYK	Protein kinase - Receptor-tyrosine kinase	Protein-tyrosine kinase	TK	EGFR
717	356	NK054-6	ErbB2 (HER2, Neu)	Pan-specific	ErbB2 (Neu) receptor-tyrosine kinase	0	5036	14	639	3209.06	5638.79	5626.83	11.9609	0.212569	0	5969	18	642	3820.54	6675.31	6055.27	620.036	10.2396	10.4522	7.61437		0	5553	16	668	3698.72	6327.92	6291.83	36.0868	0.57355	0.786119	11.8185			ERBB2	X	PYK	Protein kinase - Receptor-tyrosine kinase	Protein-tyrosine kinase	TK	EGFR
718	356	NK054-6	ErbB2 (HER2, Neu)	Pan-specific	ErbB2 (Neu) receptor-tyrosine kinase	0	4896	10	654	3195.44	5614.86				0	5070	20	616	3110.8	5435.24							0	5352	14	685	3656.53	6255.74								ERBB2	X	PYK	Protein kinase - Receptor-tyrosine kinase	Protein-tyrosine kinase	TK	EGFR
719	357	PK614	ErbB2 (HER2, Neu)	Y735	ErbB2 (Neu) receptor-tyrosine kinase	0	4850	16	643	3108.26	5461.67	5198.93	262.743	5.05378	0	5241	16	652	3406.7	5952.24	5436.03	516.204	9.49597	14.5498	4.56062		0	5189	14	685	3544.88	6064.72	6089.88	25.1579	0.413111	5.46689	17.1371			ERBB2	X	PYK	Protein kinase - Receptor-tyrosine kinase	Protein-tyrosine kinase	TK	EGFR
720	357	PK614	ErbB2 (HER2, Neu)	Y735	ErbB2 (Neu) receptor-tyrosine kinase	0	4314	12	653	2809.21	4936.19				0	4619	18	612	2815.81	4919.83							0	5015	16	715	3574.28	6115.03								ERBB2	X	PYK	Protein kinase - Receptor-tyrosine kinase	Protein-tyrosine kinase	TK	EGFR
721	358	PK615	ErbB2 (HER2, Neu)	Y877	ErbB2 (Neu) receptor-tyrosine kinase	0	3296	14	691	2267.86	3984.97	3532.97	452.001	12.7938	0	3726	14	687	2550.14	4455.65	3701.24	754.408	20.3826	33.1764	4.76305		0	2988	14	719	2138.31	3658.3	3694.61	36.3075	0.982715	13.7765	4.57533			ERBB2	X	PYK	Protein kinase - Receptor-tyrosine kinase	Protein-tyrosine kinase	TK	EGFR
722	358	PK615	ErbB2 (HER2, Neu)	Y877	ErbB2 (Neu) receptor-tyrosine kinase	0	2633	16	670	1753.39	3080.96				0	2641	18	643	1686.59	2946.83							0	3070	20	715	2180.75	3730.92								ERBB2	X	PYK	Protein kinase - Receptor-tyrosine kinase	Protein-tyrosine kinase	TK	EGFR
723	359	PK613	ErbB2 (HER2, Neu)	Y1248	ErbB2 (Neu) receptor-tyrosine kinase	0	8938	22	689	6143.12	10794.4	10804.6	10.202	0.0944229	0	10121	19	639	6455.18	11278.6	10999.1	279.457	2.54072	2.63514	1.80067		0	9352	18	717	6692.48	11449.8	11491	41.1988	0.358532	0.452955	6.35281			ERBB2	X	PYK	Protein kinase - Receptor-tyrosine kinase	Protein-tyrosine kinase	TK	EGFR
724	359	PK613	ErbB2 (HER2, Neu)	Y1248	ErbB2 (Neu) receptor-tyrosine kinase	0	8614	18	716	6154.74	10814.8				0	9242	16	665	6135.29	10719.7							0	9382	20	720	6740.64	11532.2								ERBB2	X	PYK	Protein kinase - Receptor-tyrosine kinase	Protein-tyrosine kinase	TK	EGFR
725	360	PN513	ERBB2IP (Erbin)	Y1104	Protein LAP2	0	11643	18	707	8218.88	14441.8	14872.8	430.983	2.8978	0	11162	18	709	7901.1	13804.9	14352.3	547.389	3.81394	6.71175	-3.49936		0	11981	18	734	8780.84	15022.6	15222.3	199.662	1.31164	4.20945	2.35018
726	360	PN513	ERBB2IP (Erbin)	Y1104	Protein LAP2	0	12182	18	716	8709.42	15303.7				0	12116	20	705	8527.68	14899.7							0	12037	18	750	9014.25	15422
727	361	NK231-2	ErbB3 (HER3)	Pan-specific	ErbB3 (HER3) receptor-tyrosine kinase	0	17700	18	716	12660.3	22246	22293.1	47.1161	0.211348	0	17377	20	702	12184.6	21289.1	21348.8	59.6552	0.279431	0.490779	-4.23604		0	17643	18	759	13377.4	22886.6	22826.3	60.2687	0.264032	0.47538	2.39156			ERBB3	X	PYK	Protein kinase - Receptor-tyrosine kinase	Protein-tyrosine kinase	TK	EGFR
728	361	NK231-2	ErbB3 (HER3)	Pan-specific	ErbB3 (HER3) receptor-tyrosine kinase	0	17200	19	740	12713.9	22340.3				0	17398	18	705	12252.9	21408.5							0	17812	22	748	13306.9	22766								ERBB3	X	PYK	Protein kinase - Receptor-tyrosine kinase	Protein-tyrosine kinase	TK	EGFR
729	362	NK231-3	ErbB3 (HER3)	Pan-specific	ErbB3 (HER3) receptor-tyrosine kinase	0	6028	20	805	4836.44	8498.34	8413.76	84.5715	1.00516	0	6414	16	806	5156.79	9010.02	8381.1	628.917	7.50399	8.50915	-0.38821		0	6524	18	830	5399.98	9238.51	9164.82	73.6859	0.804008	1.80916	8.92656			ERBB3	X	PYK	Protein kinase - Receptor-tyrosine kinase	Protein-tyrosine kinase	TK	EGFR
730	362	NK231-3	ErbB3 (HER3)	Pan-specific	ErbB3 (HER3) receptor-tyrosine kinase	0	5972	17	796	4740.18	8329.19				0	5856	18	760	4436.88	7752.18							0	6342	16	840	5313.84	9091.14								ERBB3	X	PYK	Protein kinase - Receptor-tyrosine kinase	Protein-tyrosine kinase	TK	EGFR
731	363	PK616	ErbB3 (HER3)	Y1289	ErbB3 (HER3) receptor-tyrosine kinase	0	6125	14	721	4406.03	7742.04	7989.23	247.191	3.09405	0	6185	16	733	4521.88	7900.69	7675.84	224.85	2.92932	6.02337	-3.92269		0	6477	14	757	4892.49	8370.28	8241.82	128.458	1.55861	4.65266	3.16155			ERBB3	X	PYK	Protein kinase - Receptor-tyrosine kinase	Protein-tyrosine kinase	TK	EGFR
732	363	PK616	ErbB3 (HER3)	Y1289	ErbB3 (HER3) receptor-tyrosine kinase	0	5230	16	899	4687.39	8236.43				0	5972	16	716	4264.5	7450.99							0	6371	14	746	4742.32	8113.36								ERBB3	X	PYK	Protein kinase - Receptor-tyrosine kinase	Protein-tyrosine kinase	TK	EGFR
733	364	PK617	ErbB3 (HER3)	Y1307	ErbB3 (HER3) receptor-tyrosine kinase	0	4857	12	683	3309.14	5814.64	5577.12	237.513	4.25869	0	5192	16	676	3498.98	6113.46	5641.49	471.972	8.36608	12.6248	1.15415		0	4932	14	712	3501.62	5990.71	5638.87	351.838	6.23951	10.4982	1.10717			ERBB3	X	PYK	Protein kinase - Receptor-tyrosine kinase	Protein-tyrosine kinase	TK	EGFR
734	364	PK617	ErbB3 (HER3)	Y1307	ErbB3 (HER3) receptor-tyrosine kinase	0	4500	18	678	3038.8	5339.61				0	4302	14	690	2958.72	5169.52							0	4536	18	684	3090.31	5287.03								ERBB3	X	PYK	Protein kinase - Receptor-tyrosine kinase	Protein-tyrosine kinase	TK	EGFR
735	365	PK618	ErbB3 (HER3)	Y1328	ErbB3 (HER3) receptor-tyrosine kinase	0	6388	18	588	3745.56	6581.5	6624.38	42.8779	0.647274	0	6780	16	621	4200.44	7339.08	6882.63	456.446	6.63185	7.27913	3.89858		0	7294	16	657	4781.65	8180.64	7787.61	393.023	5.04677	5.69404	17.56			ERBB3	X	PYK	Protein kinase - Receptor-tyrosine kinase	Protein-tyrosine kinase	TK	EGFR
736	365	PK618	ErbB3 (HER3)	Y1328	ErbB3 (HER3) receptor-tyrosine kinase	0	6471	18	588	3794.36	6667.25				0	6448	18	572	3677.96	6426.19							0	6784	20	639	4322.2	7394.59								ERBB3	X	PYK	Protein kinase - Receptor-tyrosine kinase	Protein-tyrosine kinase	TK	EGFR
737	366	NK235-1	ErbB4 (HER4)	Pan-specific	ErbB4 receptor-tyrosine kinase	0	5169	16	690	3555.57	6247.66	6143.67	103.992	1.69268	0	5059	16	645	3252.74	5683.23	5436	247.223	4.54788	6.24056	-11.5186		0	5524	16	674	3712.39	6351.31	6077.73	273.582	4.50137	6.19405	-1.0732			ERBB4	X	PYK	Protein kinase - Receptor-tyrosine kinase	Protein-tyrosine kinase	TK	EGFR
738	366	NK235-1	ErbB4 (HER4)	Pan-specific	ErbB4 receptor-tyrosine kinase	0	5345	16	645	3437.2	6039.67				0	4762	18	626	2969.74	5188.78							0	5135	18	663	3392.57	5804.15								ERBB4	X	PYK	Protein kinase - Receptor-tyrosine kinase	Protein-tyrosine kinase	TK	EGFR
739	367	NK235-3	ErbB4 (HER4)	Pan-specific	ErbB4 receptor-tyrosine kinase	0	12353	16	646	7969.7	14003.9	13977.7	26.2606	0.187875	0	11210	14	617	6907.93	12069.6	12710.8	641.12	5.04391	5.23179	-9.06384		0	11828	22	648	7650.29	13088.4	13652.7	564.29	4.13317	4.32105	-2.32483			ERBB4	X	PYK	Protein kinase - Receptor-tyrosine kinase	Protein-tyrosine kinase	TK	EGFR
740	367	NK235-3	ErbB4 (HER4)	Pan-specific	ErbB4 receptor-tyrosine kinase	0	13120	18	606	7939.81	13951.4				0	12670	18	604	7641.81	13351.9							0	12388	22	672	8309.95	14217								ERBB4	X	PYK	Protein kinase - Receptor-tyrosine kinase	Protein-tyrosine kinase	TK	EGFR
741	368	PK619	ErbB4 (HER4)	Y733	ErbB4 receptor-tyrosine kinase	0	406	10	438	173.448	304.774	306.834	2.06025	0.671456	0	496	16	421	202.08	353.077	320.431	32.6467	10.1884	10.8598	4.43127		0	507	12	502	248.49	425.127	397.369	27.7584	6.98556	7.65701	29.5061			ERBB4	X	PYK	Protein kinase - Receptor-tyrosine kinase	Protein-tyrosine kinase	TK	EGFR
742	368	PK619	ErbB4 (HER4)	Y733	ErbB4 receptor-tyrosine kinase	0	378	11	479	175.793	308.894				0	376	14	455	164.71	287.784							0	452	12	491	216.04	369.61								ERBB4	X	PYK	Protein kinase - Receptor-tyrosine kinase	Protein-tyrosine kinase	TK	EGFR
743	369	PK620	ErbB4 (HER4)	Y875	ErbB4 receptor-tyrosine kinase	0	38	10	655	18.34	32.2261	34.6404	2.41432	6.96967	0	50	16	657	22.338	39.0293	42.7299	3.7006	8.66045	15.6301	23.3528		0	58	12	651	29.946	51.2329	61.4047	10.1718	16.5652	23.5349	77.2632			ERBB4	X	PYK	Protein kinase - Receptor-tyrosine kinase	Protein-tyrosine kinase	TK	EGFR
744	369	PK620	ErbB4 (HER4)	Y875	ErbB4 receptor-tyrosine kinase	0	40	8	659	21.088	37.0547				0	100	14	309	26.574	46.4305							0	119	12	391	41.837	71.5765								ERBB4	X	PYK	Protein kinase - Receptor-tyrosine kinase	Protein-tyrosine kinase	TK	EGFR
745	370	PN584	ERF	T526	ETS domain-containing transcription factor ERF	0	8821	16	655	5767.27	10133.9	10220.7	86.7864	0.849121	0	10311	22	613	6307.16	11020	10262.4	757.52	7.38148	8.2306	0.408038		0	9567	20	668	6377.4	10910.7	11269.5	358.767	3.18353	4.03265	10.2609						Transcription protein					X
746	370	PN584	ERF	T526	ETS domain-containing transcription factor ERF	0	8666	14	678	5866.06	10307.5				0	8878	18	614	5440.04	9504.92							0	9614	14	708	6796.8	11628.2											Transcription protein					X
747	371	NK055-1	ERK1 (MAPK3)	Pan-specific	Extracellular regulated protein-serine kinase 1 (p44 MAP kinase)	0	8414	14	757	6358.8	11173.3	11498.6	325.301	2.82903	0	10466	18	769	8034.51	14038	12847.9	1190.11	9.26302	12.0921	11.7342		0	8571	16	769	6578.8	11255.3	11741.9	486.663	4.14466	6.97369	2.11583			ERK1	X	PSTK	Protein kinase - Non-receptor protein-serine/threonine	Protein-serine/threonine kinase	CMGC	MAPK	ERK
748	371	NK055-1	ERK1 (MAPK3)	Pan-specific	Extracellular regulated protein-serine kinase 1 (p44 MAP kinase)	0	8642	15	780	6729.06	11823.9				0	9716	18	688	6672.22	11657.8							0	9174	22	781	7147.71	12228.6								ERK1	X	PSTK	Protein kinase - Non-receptor protein-serine/threonine	Protein-serine/threonine kinase	CMGC	MAPK	ERK
749	372	NK055-3	ERK1 (MAPK3)	Pan-specific	Extracellular regulated protein-serine kinase 1 (p44 MAP kinase)	0	9122	17	680	6191.4	10879.2	10793	86.1722	0.798407	0	9716	14	677	6568.25	11476.2	11240.5	235.689	2.09679	2.8952	4.14561		0	10084	18	729	7338.11	12554.3	12465.7	88.6644	0.711267	1.50967	15.4976			ERK1	X	PSTK	Protein kinase - Non-receptor protein-serine/threonine	Protein-serine/threonine kinase	CMGC	MAPK	ERK
750	372	NK055-3	ERK1 (MAPK3)	Pan-specific	Extracellular regulated protein-serine kinase 1 (p44 MAP kinase)	0	9331	14	654	6093.32	10706.9				0	9844	18	641	6298.47	11004.8							0	10124	20	716	7234.46	12377								ERK1	X	PSTK	Protein kinase - Non-receptor protein-serine/threonine	Protein-serine/threonine kinase	CMGC	MAPK	ERK
751	373	NK055-4	ERK1 (MAPK3)	Pan-specific	Extracellular regulated protein-serine kinase 1 (p44 MAP kinase)	0	626	14	502	307.224	539.838	542.178	2.34052	0.431688	0	638	14	509	317.616	554.943	524.584	30.3596	5.78737	6.21906	-3.24512		0	778	12	536	410.576	702.43	685.697	16.7337	2.4404	2.87209	26.4707			ERK1	X	PSTK	Protein kinase - Non-receptor protein-serine/threonine	Protein-serine/threonine kinase	CMGC	MAPK	ERK
752	373	NK055-4	ERK1 (MAPK3)	Pan-specific	Extracellular regulated protein-serine kinase 1 (p44 MAP kinase)	0	590	14	538	309.888	544.519				0	580	12	498	282.864	494.224							0	714	12	557	391.014	668.963								ERK1	X	PSTK	Protein kinase - Non-receptor protein-serine/threonine	Protein-serine/threonine kinase	CMGC	MAPK	ERK
753	374	PK621	ERK1 (MAPK3)	T202+Y204	Extracellular regulated protein-serine kinase 1 (p44 MAP kinase)	0	5506	14	755	4146.46	7285.94	6915.27	370.67	5.36017	0	6112	18	725	4418.15	7719.46	7200.49	518.967	7.20738	12.5675	4.12454		0	5881	14	805	4722.94	8080.19	7751.58	328.609	4.23925	9.59942	12.0937			ERK1	X	PSTK	Protein kinase - Non-receptor protein-serine/threonine	Protein-serine/threonine kinase	CMGC	MAPK	ERK
754	374	PK621	ERK1 (MAPK3)	T202+Y204	Extracellular regulated protein-serine kinase 1 (p44 MAP kinase)	0	5185	12	720	3724.56	6544.6				0	5479	16	700	3824.1	6681.53							0	5782	20	753	4338.79	7422.97								ERK1	X	PSTK	Protein kinase - Non-receptor protein-serine/threonine	Protein-serine/threonine kinase	CMGC	MAPK	ERK
755	375	PK182	ERK1 (MAPK3)	T202+Y204	Extracellular regulated protein-serine kinase 1 (p44 MAP kinase)	0	934	12	559	515.398	905.63	917.412	11.7817	1.28423	0	881	12	513	445.797	778.903	878.279	99.3755	11.3148	12.599	-4.26558		0	1105	16	654	712.206	1218.47	1141.98	76.4934	6.69833	7.98256	24.4783			ERK1	X	PSTK	Protein kinase - Non-receptor protein-serine/threonine	Protein-serine/threonine kinase	CMGC	MAPK	ERK
756	375	PK182	ERK1 (MAPK3)	T202+Y204	Extracellular regulated protein-serine kinase 1 (p44 MAP kinase)	0	947	16	568	528.808	929.193				0	962	12	589	559.55	977.654							0	1066	14	592	622.784	1065.48								ERK1	X	PSTK	Protein kinase - Non-receptor protein-serine/threonine	Protein-serine/threonine kinase	CMGC	MAPK	ERK
757	376	PK864	ERK1 (MAPK3)	Y204	Extracellular regulated protein-serine kinase 1 (p44 MAP kinase)	0	7146	12	682	4865.39	8549.2	8011.73	537.471	6.70855	0	7682	18	643	4927.95	8610.19	8061.34	548.854	6.80848	13.517	0.619183		0	7328	14	695	5083.23	8696.6	8811.37	114.767	1.30248	8.01103	9.98082			ERK1	X	PSTK	Protein kinase - Non-receptor protein-serine/threonine	Protein-serine/threonine kinase	CMGC	MAPK	ERK
758	376	PK864	ERK1 (MAPK3)	Y204	Extracellular regulated protein-serine kinase 1 (p44 MAP kinase)	0	6546	12	651	4253.63	7474.26				0	6509	14	662	4299.69	7512.48							0	6854	16	763	5217.39	8926.13								ERK1	X	PSTK	Protein kinase - Non-receptor protein-serine/threonine	Protein-serine/threonine kinase	CMGC	MAPK	ERK
759	377	PK183	ERK1 (MAPK3)	Y204	Extracellular regulated protein-serine kinase 1 (p44 MAP kinase)	0	340	12	462	151.536	266.271	286.387	20.1158	7.024	0	301	10	461	134.151	234.391	280.583	46.192	16.4629	23.4869	-2.02669		0	468	12	538	245.328	419.717	447.802	28.0852	6.27178	13.2958	56.3628			ERK1	X	PSTK	Protein kinase - Non-receptor protein-serine/threonine	Protein-serine/threonine kinase	CMGC	MAPK	ERK
760	377	PK183	ERK1 (MAPK3)	Y204	Extracellular regulated protein-serine kinase 1 (p44 MAP kinase)	0	378	10	474	174.432	306.503				0	376	10	511	187.026	326.775							0	500	12	570	278.16	475.888								ERK1	X	PSTK	Protein kinase - Non-receptor protein-serine/threonine	Protein-serine/threonine kinase	CMGC	MAPK	ERK
761	378	PK866	ERK1 (MAPK3)	Y204+T207	Extracellular regulated protein-serine kinase 1 (p44 MAP kinase)	0	7117	18	658	4671.14	8207.88	7848.98	358.903	4.5726	0	7397	18	611	4508.57	7877.44	7489.05	388.386	5.18605	9.75865	-4.58564		0	8101	18	684	5528.77	9458.85	9079.56	379.29	4.17741	8.75001	15.6782			ERK1	X	PSTK	Protein kinase - Non-receptor protein-serine/threonine	Protein-serine/threonine kinase	CMGC	MAPK	ERK
762	378	PK866	ERK1 (MAPK3)	Y204+T207	Extracellular regulated protein-serine kinase 1 (p44 MAP kinase)	0	6635	16	644	4262.64	7490.08				0	6506	14	626	4063.99	7100.67							0	7040	16	724	5085.38	8700.27								ERK1	X	PSTK	Protein kinase - Non-receptor protein-serine/threonine	Protein-serine/threonine kinase	CMGC	MAPK	ERK
763	379	PK865	ERK1 (MAPK3)	T207	Extracellular regulated protein-serine kinase 1 (p44 MAP kinase)	0	9666	16	643	6204.95	10903	11143.1	240.132	2.15497	0	9680	18	618	5971.12	10432.8	10353.7	79.0825	0.763806	2.91878	-7.08417		0	9998	20	653	6515.63	11147.2	11586.7	439.52	3.79331	5.94828	3.98089			ERK1	X	PSTK	Protein kinase - Non-receptor protein-serine/threonine	Protein-serine/threonine kinase	CMGC	MAPK	ERK
764	379	PK865	ERK1 (MAPK3)	T207	Extracellular regulated protein-serine kinase 1 (p44 MAP kinase)	0	10220	18	635	6478.27	11383.3				0	9382	18	628	5880.59	10274.7							0	10003	18	704	7029.44	12026.3								ERK1	X	PSTK	Protein kinase - Non-receptor protein-serine/threonine	Protein-serine/threonine kinase	CMGC	MAPK	ERK
765	380	PK878	ERK1 (MAPK3)	S265	Extracellular regulated protein-serine kinase 1 (p44 MAP kinase)	0	10785	20	648	6975.72	12257.4	12368.5	111.143	0.898597	0	10966	18	686	7510.33	13122.2	12892.5	229.659	1.78134	2.67994	4.2365		0	10944	20	744	8127.46	13904.8	13499.7	405.127	3.00102	3.89962	9.14543			ERK1	X	PSTK	Protein kinase - Non-receptor protein-serine/threonine	Protein-serine/threonine kinase	CMGC	MAPK	ERK
766	380	PK878	ERK1 (MAPK3)	S265	Extracellular regulated protein-serine kinase 1 (p44 MAP kinase)	0	10341	18	688	7102.22	12479.7				0	10465	22	694	7247.44	12662.8							0	10546	18	727	7653.86	13094.5								ERK1	X	PSTK	Protein kinase - Non-receptor protein-serine/threonine	Protein-serine/threonine kinase	CMGC	MAPK	ERK
767	381	PK879	ERK1 (MAPK3)	S283	Extracellular regulated protein-serine kinase 1 (p44 MAP kinase)	0	13686	20	690	9429.54	16569.1	16977.4	408.317	2.40506	0	13908	24	678	9413.35	16447.2	16784.7	337.528	2.01093	4.41599	-1.13518		0	13454	20	731	9820.25	16800.9	16665.4	135.511	0.813126	3.21819	-1.83784			ERK1	X	PSTK	Protein kinase - Non-receptor protein-serine/threonine	Protein-serine/threonine kinase	CMGC	MAPK	ERK
768	381	PK879	ERK1 (MAPK3)	S283	Extracellular regulated protein-serine kinase 1 (p44 MAP kinase)	0	13228	18	749	9894.29	17385.7				0	13807	24	711	9799.71	17122.2							0	13592	22	712	9661.84	16529.9								ERK1	X	PSTK	Protein kinase - Non-receptor protein-serine/threonine	Protein-serine/threonine kinase	CMGC	MAPK	ERK
769	382	NK056-3	ERK2 (MAPK1)	Pan-specific	Extracellular regulated protein-serine kinase 2 (p42 MAP kinase)	0	10300	20	686	7052.08	12391.5	12146.9	244.63	2.01393	0	11666	22	660	7685.04	13427.4	12584.7	842.741	6.69657	8.71049	3.60393		0	9692	20	727	7031.54	12029.9	12442.7	412.863	3.31811	5.33204	2.43526			ERK2	X	PSTK	Protein kinase - Non-receptor protein-serine/threonine	Protein-serine/threonine kinase	CMGC	MAPK	ERK
770	382	NK056-3	ERK2 (MAPK1)	Pan-specific	Extracellular regulated protein-serine kinase 2 (p42 MAP kinase)	0	9624	16	705	6773.64	11902.3				0	9474	22	711	6720.37	11741.9							0	10001	22	753	7514.19	12855.6								ERK2	X	PSTK	Protein kinase - Non-receptor protein-serine/threonine	Protein-serine/threonine kinase	CMGC	MAPK	ERK
771	383	NK056-4	ERK2 (MAPK1)	Pan-specific	Extracellular regulated protein-serine kinase 2 (p42 MAP kinase)	0	17954	20	706	12661.4	22247.9	22316.8	68.8134	0.308348	0	19434	22	712	13821.3	24148.9	22423	1725.82	7.69664	8.00499	0.476238		0	18987	20	748	14187.3	24272.2	23312.4	959.846	4.11732	4.42567	4.46141			ERK2	X	PSTK	Protein kinase - Non-receptor protein-serine/threonine	Protein-serine/threonine kinase	CMGC	MAPK	ERK
772	383	NK056-4	ERK2 (MAPK1)	Pan-specific	Extracellular regulated protein-serine kinase 2 (p42 MAP kinase)	0	17424	20	732	12739.7	22385.6				0	17466	20	679	11845.8	20697.2							0	18143	22	721	13065.2	22352.6								ERK2	X	PSTK	Protein kinase - Non-receptor protein-serine/threonine	Protein-serine/threonine kinase	CMGC	MAPK	ERK
773	384	PK880	ERK2 (MAPK1)	Y263+S266	Extracellular regulated protein-serine kinase 2 (p42 MAP kinase)	0	3950	16	953	3749.1	6587.72	8697.07	2109.34	24.2535	0	9094	16	677	6145.81	10738	9371.74	1366.31	14.5791	38.8326	7.75743		0	8578	14	719	6157.52	10534.5	10559.1	24.6122	0.233089	24.4866	21.4104			ERK2	X	PSTK	Protein kinase - Non-receptor protein-serine/threonine	Protein-serine/threonine kinase	CMGC	MAPK	ERK
774	384	PK880	ERK2 (MAPK1)	Y263+S266	Extracellular regulated protein-serine kinase 2 (p42 MAP kinase)	0	8267	12	745	6149.98	10806.4				0	4760	12	965	4581.82	8005.43							0	8634	18	718	6186.29	10583.8								ERK2	X	PSTK	Protein kinase - Non-receptor protein-serine/threonine	Protein-serine/threonine kinase	CMGC	MAPK	ERK
775	385	NK057-2	ERK3 (MAPK6)	Pan-specific	Extracellular regulated protein-serine kinase 3	0	1402	12	592	822.88	1445.92	1405.64	40.2773	2.8654	0	1399	13	584	809.424	1414.24	1375.04	39.1988	2.85074	5.71614	-2.17727		0	1614	14	613	980.8	1677.99	1694.68	16.6841	0.984502	3.8499	20.5624			ERK3	X	PSTK	Protein kinase - Non-receptor protein-serine/threonine	Protein-serine/threonine kinase	CMGC	MAPK	ERK
776	385	NK057-2	ERK3 (MAPK6)	Pan-specific	Extracellular regulated protein-serine kinase 3	0	1340	14	586	777.036	1365.37				0	1372	14	563	764.554	1335.84							0	1630	14	619	1000.3	1711.36								ERK3	X	PSTK	Protein kinase - Non-receptor protein-serine/threonine	Protein-serine/threonine kinase	CMGC	MAPK	ERK
777	386	PK623	ERK3 (MAPK6)	S189	Extracellular regulated protein-serine kinase 3	0	4987	14	763	3794.4	6667.32	6362.81	304.506	4.78571	0	5030	16	713	3574.98	6246.26	6089.76	156.502	2.56993	7.35564	-4.29135		0	5593	12	762	4252.72	7275.73	7108.31	167.423	2.35531	7.14102	11.7165			ERK3	X	PSTK	Protein kinase - Non-receptor protein-serine/threonine	Protein-serine/threonine kinase	CMGC	MAPK	ERK
778	386	PK623	ERK3 (MAPK6)	S189	Extracellular regulated protein-serine kinase 3	0	4748	12	728	3447.81	6058.31				0	4739	16	719	3395.84	5933.26							0	5280	18	771	4057	6940.89								ERK3	X	PSTK	Protein kinase - Non-receptor protein-serine/threonine	Protein-serine/threonine kinase	CMGC	MAPK	ERK
779	387	NK058	ERK4 (MAPK4)	Pan-specific	Extracellular regulated protein-serine kinase 4	0	158	8	409	61.35	107.801	94.2446	13.5564	14.3843	0	164	13	401	60.551	105.796	101.96	3.83601	3.76228	18.1465	8.18619		0	188	14	464	80.736	138.126	126.787	11.3395	8.9437	23.328	34.5298			ERK4	X	PSTK	Protein kinase - Non-receptor protein-serine/threonine	Protein-serine/threonine kinase	CMGC	MAPK	ERK
780	387	NK058	ERK4 (MAPK4)	Pan-specific	Extracellular regulated protein-serine kinase 4	0	80	10	656	45.92	80.6882				0	140	10	432	56.16	98.1236							0	154	14	482	67.48	115.448								ERK4	X	PSTK	Protein kinase - Non-receptor protein-serine/threonine	Protein-serine/threonine kinase	CMGC	MAPK	ERK
781	388	PK624	ERK4 (MAPK4)	S186	Extracellular regulated protein-serine kinase 4	0	2859	12	932	2653.4	4662.42	9445.68	4783.26	50.6397	0	9850	10	687	6760.08	11811.3	13921.9	2110.55	15.16	65.7996	47.3886		0	10754	14	760	8162.4	13964.6	14147.1	182.519	1.29015	51.9298	49.7731			ERK4	X	PSTK	Protein kinase - Non-receptor protein-serine/threonine	Protein-serine/threonine kinase	CMGC	MAPK	ERK
782	388	PK624	ERK4 (MAPK4)	S186	Extracellular regulated protein-serine kinase 4	0	11942	16	679	8097.75	14228.9				0	13921	18	660	9175.98	16032.4							0	11714	16	716	8375.77	14329.6								ERK4	X	PSTK	Protein kinase - Non-receptor protein-serine/threonine	Protein-serine/threonine kinase	CMGC	MAPK	ERK
783	389	NK206-3	ERK5 (MAPK7)	Pan-specific	Extracellular regulated protein-serine kinase 5 (Big MAP kinase 1 (BMK1))	0	400	12	565	219.22	385.202	338.852	46.35	13.6786	0	377	12	534	194.91	340.55	327.105	13.4448	4.11025	17.7888	-3.46666		0	432	10	578	243.916	417.302	399.647	17.6542	4.41744	18.096	17.9417			ERK5	X	PSTK	Protein kinase - Non-receptor protein-serine/threonine	Protein-serine/threonine kinase	CMGC	MAPK	ERK
784	389	NK206-3	ERK5 (MAPK7)	Pan-specific	Extracellular regulated protein-serine kinase 5 (Big MAP kinase 1 (BMK1))	0	316	10	544	166.464	292.502				0	350	10	528	179.52	313.66							0	408	10	561	223.278	381.993								ERK5	X	PSTK	Protein kinase - Non-receptor protein-serine/threonine	Protein-serine/threonine kinase	CMGC	MAPK	ERK
785	390	NK206-5	ERK5 (MAPK7)	Pan-specific	Extracellular regulated protein-serine kinase 5 (Big MAP kinase 1 (BMK1))	0	5150	12	703	3612.01	6346.84	6248.86	97.9768	1.56791	0	4242	12	608	2571.84	4493.56	5260.41	766.853	14.5778	16.1457	-15.8181		0	5621	10	680	3815.48	6527.68	6593.14	65.4568	0.992802	2.56072	5.50941			ERK5	X	PSTK	Protein kinase - Non-receptor protein-serine/threonine	Protein-serine/threonine kinase	CMGC	MAPK	ERK
786	390	NK206-5	ERK5 (MAPK7)	Pan-specific	Extracellular regulated protein-serine kinase 5 (Big MAP kinase 1 (BMK1))	0	5268	12	666	3500.5	6150.89				0	5356	16	646	3449.64	6027.26							0	5572	12	700	3892	6658.59								ERK5	X	PSTK	Protein kinase - Non-receptor protein-serine/threonine	Protein-serine/threonine kinase	CMGC	MAPK	ERK
787	391	PK184	ERK5 (MAPK7)	T219+Y221	Extracellular regulated protein-serine kinase 5 (Big MAP kinase 1 (BMK1))	0	183	15	502	84.336	148.191	130.017	18.1742	13.9783	0	174	11	446	72.698	127.019	110.573	16.4465	14.874	28.8523	-14.9551		0	228	18	570	119.7	204.788	180.023	24.7644	13.7562	27.7346	38.4618			ERK5	X	PSTK	Protein kinase - Non-receptor protein-serine/threonine	Protein-serine/threonine kinase	CMGC	MAPK	ERK
788	391	PK184	ERK5 (MAPK7)	T219+Y221	Extracellular regulated protein-serine kinase 5 (Big MAP kinase 1 (BMK1))	0	150	16	475	63.65	111.842				0	126	14	481	53.872	94.126							0	164	14	605	90.75	155.259								ERK5	X	PSTK	Protein kinase - Non-receptor protein-serine/threonine	Protein-serine/threonine kinase	CMGC	MAPK	ERK
789	392	PK626	ERK5 (MAPK7)	Y221	Extracellular regulated protein-serine kinase 5 (Big MAP kinase 1 (BMK1))	0	13233	18	704	9303.36	16347.4	16642	294.674	1.77066	0	13942	20	677	9425.19	16467.8	16602.1	134.289	0.808867	2.57952	-0.239831		0	13770	20	737	10133.8	17337.2	16527.8	809.418	4.89731	6.66796	-0.686349			ERK5	X	PSTK	Protein kinase - Non-receptor protein-serine/threonine	Protein-serine/threonine kinase	CMGC	MAPK	ERK
790	392	PK626	ERK5 (MAPK7)	Y221	Extracellular regulated protein-serine kinase 5 (Big MAP kinase 1 (BMK1))	0	13692	20	705	9638.76	16936.7				0	14622	20	656	9578.91	16736.4							0	12816	20	718	9187.53	15718.4								ERK5	X	PSTK	Protein kinase - Non-receptor protein-serine/threonine	Protein-serine/threonine kinase	CMGC	MAPK	ERK
791	393	PN585	ESRRA (ERR1)	S19+S22	Steroid hormone receptor ERR1	0	7156	21	647	4616.35	8111.6	7940.74	170.852	2.15158	0	7431	20	623	4617.05	8066.98	7811.74	255.25	3.26752	5.4191	-1.62465		0	7008	20	667	4661	7974.22	7803.51	170.713	2.18764	4.33923	-1.72821						Receptor, nuclear					X
792	393	PN585	ESRRA (ERR1)	S19+S22	Steroid hormone receptor ERR1	0	6938	18	639	4421.88	7769.89				0	6874	20	631	4324.87	7556.49							0	6608	18	677	4461.43	7632.8											Receptor, nuclear					X
793	394	PN514	ESYT1	Y822	Extended synaptotagmin-1	0	14198	22	695	9852.32	17312	17376.2	64.2518	0.369769	0	12931	20	657	8482.53	14820.8	15596.6	775.845	4.97443	5.3442	-10.2415		0	13611	24	715	9714.7	16620.3	16775	154.677	0.92207	1.29184	-3.46006
794	394	PN514	ESYT1	Y822	Extended synaptotagmin-1	0	14041	22	708	9925.45	17440.5				0	14092	22	666	9370.62	16372.5							0	13669	20	725	9895.52	16929.7
795	395	PN586	Ets-1	S282	Protein C-ets-1	0	7366	18	646	4746.81	8340.84	8423.24	82.3979	0.978221	0	7677	20	634	4854.54	8481.92	8150.68	331.244	4.06401	5.04223	-3.23579		0	6897	18	695	4780.9	8179.37	8232.65	53.2816	0.647198	1.62542	-2.26261						Transcription protein					X
796	395	PN586	Ets-1	S282	Protein C-ets-1	0	7234	20	671	4840.59	8505.63				0	7252	22	619	4475.37	7819.43							0	7342	26	662	4843.19	8285.93											Transcription protein					X
797	396	PN587	ETV6 (Tel)	S22	Transcription factor ETV6	0	10834	22	639	6908.87	12139.9	11902.2	237.679	1.99693	0	13588	22	635	8614.41	15051.2	14180.8	870.433	6.13811	8.13504	19.1441		0	11368	20	652	7398.9	12658.3	12860.5	202.144	1.57183	3.56875	8.05115						Transcription protein					X
798	396	PN587	ETV6 (Tel)	S22	Transcription factor ETV6	0	10310	18	645	6638.34	11664.5				0	12248	20	623	7618.04	13310.4							0	11296	18	677	7635.21	13062.6											Transcription protein					X
799	397	PN697	EZH2	T487	Histone-lysine N-methyltransferase EZH2	0	8874	16	628	5562.82	9774.7	9620.98	153.714	1.5977	0	10335	20	617	6364.35	11119.9	10890.4	229.457	2.10696	3.70466	13.1947		0	8844	18	668	5895.77	10086.7	10806.9	720.144	6.66376	8.26146	12.326						Enzyme - Histone H3 Lys 27 (H3K27) methyltransferase
800	397	PN697	EZH2	T487	Histone-lysine N-methyltransferase EZH2	0	7949	14	679	5387.86	9467.27				0	9265	20	660	6101.7	10661							0	9235	18	731	6737.63	11527											Enzyme - Histone H3 Lys 27 (H3K27) methyltransferase
801	398	PN224	EZR	Y146	Ezrin; Cytovilin	0	455	14	477	210.357	369.628	377.488	7.85972	2.08211	0	526	12	467	240.038	419.398	400.594	18.8035	4.69391	6.77602	6.12116		0	540	10	526	278.78	476.948	472.642	4.30619	0.911088	2.9932	25.2072
802	398	PN224	EZR	Y146	Ezrin; Cytovilin	0	425	12	531	219.303	385.348				0	486	12	461	218.514	381.791							0	520	14	541	273.746	468.336
803	399	PN175	EZR	Y354	Ezrin; Cytovilin	0	968	12	326	311.656	547.625	325.78	221.845	68.0965	0	60	10	650	32.5	56.7845	204.966	148.181	72.2956	140.392	-37.0847		0	926	12	363	331.782	567.626	668.794	101.167	15.1268	83.2233	105.29
804	399	PN175	EZR	Y354	Ezrin; Cytovilin	0	99	8	650	59.15	103.935				0	662	10	310	202.12	353.147							0	1184	12	384	450.048	769.961
805	400	PN174	EZR	T567	Ezrin; Cytovilin	0	535	8	259	136.493	239.838	211.542	28.2962	13.3762	0	594	12	228	132.696	231.848	141.077	90.7713	64.3416	77.7178	-33.3101		0	472	8	286	132.704	227.035	194.928	32.1074	16.4714	29.8475	-7.85371
806	400	PN174	EZR	T567	Ezrin; Cytovilin	0	390	8	273	104.286	183.246				0	67	8	488	28.792	50.3058							0	315	8	310	95.17	162.821
807	401	NK060	FAK (PTK2)	Pan-specific	Focal adhesion protein-tyrosine kinase	0	200	14	537	99.882	175.507	170.944	4.56331	2.66948	0	234	14	537	118.14	206.416	171.895	34.5215	20.0829	22.7524	0.556021		0	204	12	552	105.984	181.322	192.437	11.1153	5.77609	8.44556	12.5732			FAK	X	PYK	Protein kinase - Non-receptor protein-tyrosine	Protein-tyrosine kinase	TK	Fak
808	401	NK060	FAK (PTK2)	Pan-specific	Focal adhesion protein-tyrosine kinase	0	188	12	538	94.688	166.381				0	168	12	504	78.624	137.373							0	212	10	589	118.978	203.552								FAK	X	PYK	Protein kinase - Non-receptor protein-tyrosine	Protein-tyrosine kinase	TK	Fak
809	402	NK060-2	FAK (PTK2)	Pan-specific	Focal adhesion protein-tyrosine kinase	0	126	8	463	54.634	96	109.117	13.1171	12.0211	0	176	10	475	78.85	137.768	129.656	8.11232	6.25682	18.2779	18.8225		0	142	8	546	73.164	125.172	118.428	6.74414	5.69472	17.7158	8.53285			FAK	X	PYK	Protein kinase - Non-receptor protein-tyrosine	Protein-tyrosine kinase	TK	Fak
810	402	NK060-2	FAK (PTK2)	Pan-specific	Focal adhesion protein-tyrosine kinase	0	140	8	527	69.564	122.234				0	142	10	527	69.564	121.543							0	128	8	544	65.28	111.684								FAK	X	PYK	Protein kinase - Non-receptor protein-tyrosine	Protein-tyrosine kinase	TK	Fak
811	403	PK017-1	FAK (PTK2)	Y397	Focal adhesion protein-tyrosine kinase	0	11396	12	368	4189.31	7361.24	7620.74	259.502	3.40521	0	10429	12	384	4000.13	6989.08	6805.54	183.541	2.69694	6.10215	-10.6971		0	14256	10	406	5783.88	9895.29	9321.89	573.409	6.15121	9.55643	22.3226			FAK	X	PYK	Protein kinase - Non-receptor protein-tyrosine	Protein-tyrosine kinase	TK	Fak
812	403	PK017-1	FAK (PTK2)	Y397	Focal adhesion protein-tyrosine kinase	0	11752	12	382	4484.68	7880.24				0	10313	14	368	3790.03	6622							0	12764	12	401	5113.55	8748.48								FAK	X	PYK	Protein kinase - Non-receptor protein-tyrosine	Protein-tyrosine kinase	TK	Fak
813	404	PK627	FAK (PTK2)	Y397	Focal adhesion protein-tyrosine kinase	0	8686	18	747	6475	11377.5	11385.8	8.31833	0.0730586	0	8782	20	712	6238.54	10900.1	10978.3	78.2088	0.712396	0.785454	-3.57945		0	9529	20	778	7398	12656.8	12103.2	553.603	4.57402	4.64708	6.30052			FAK	X	PYK	Protein kinase - Non-receptor protein-tyrosine	Protein-tyrosine kinase	TK	Fak
814	404	PK627	FAK (PTK2)	Y397	Focal adhesion protein-tyrosine kinase	0	8291	20	784	6484.46	11394.2				0	9086	20	698	6328.07	11056.5							0	8887	16	761	6750.83	11549.6								FAK	X	PYK	Protein kinase - Non-receptor protein-tyrosine	Protein-tyrosine kinase	TK	Fak
815	405	PK151	FAK (PTK2)	Y576+Y577	Focal adhesion protein-tyrosine kinase	0	1212	14	330	395.34	694.67	683.196	11.4742	1.67948	0	2254	16	340	760.92	1329.49	1039.16	290.333	27.9393	29.6187	52.1024	Possible	0	1424	18	376	528.656	904.447	771.986	132.46	17.1584	18.8378	12.9963			FAK	X	PYK	Protein kinase - Non-receptor protein-tyrosine	Protein-tyrosine kinase	TK	Fak
816	405	PK151	FAK (PTK2)	Y576+Y577	Focal adhesion protein-tyrosine kinase	0	1022	16	380	382.28	671.722				0	1345	14	322	428.582	748.825							0	988	12	383	373.808	639.526								FAK	X	PYK	Protein kinase - Non-receptor protein-tyrosine	Protein-tyrosine kinase	TK	Fak
817	406	PK628	FAK (PTK2)	Y576+Y577	Focal adhesion protein-tyrosine kinase	0	4702	16	949	4447.01	7814.06	8891.18	1077.12	12.1145	0	8368	18	728	6078.8	10621	10147.9	473.102	4.66208	16.7766	14.1341		0	8606	22	719	6171.9	10559.1	10421.9	137.228	1.31673	13.4313	17.2162			FAK	X	PYK	Protein kinase - Non-receptor protein-tyrosine	Protein-tyrosine kinase	TK	Fak
818	406	PK628	FAK (PTK2)	Y576+Y577	Focal adhesion protein-tyrosine kinase	0	7705	18	738	5673.01	9968.3				0	8043	18	690	5537.25	9674.77							0	8046	20	749	6011.47	10284.7								FAK	X	PYK	Protein kinase - Non-receptor protein-tyrosine	Protein-tyrosine kinase	TK	Fak
819	407	PK629	FAK (PTK2)	Y577	Focal adhesion protein-tyrosine kinase	0	7304	16	701	5108.89	8977.07	9033.04	55.9704	0.619619	0	7285	20	693	5034.65	8796.61	8448.04	348.565	4.12599	4.7456	-6.47616		0	7760	18	746	5775.53	9881.02	9488.29	392.73	4.1391	4.75872	5.03986			FAK	X	PYK	Protein kinase - Non-receptor protein-tyrosine	Protein-tyrosine kinase	TK	Fak
820	407	PK629	FAK (PTK2)	Y577	Focal adhesion protein-tyrosine kinase	0	6924	18	749	5172.59	9089.01				0	6964	14	667	4635.65	8099.48							0	7349	16	725	5316.43	9095.56								FAK	X	PYK	Protein kinase - Non-receptor protein-tyrosine	Protein-tyrosine kinase	TK	Fak
821	408	PK020-3	FAK (PTK2)	S722	Focal adhesion protein-tyrosine kinase	0	96	10	660	56.76	99.7357	217.728	117.992	54.1926	0	919	14	312	282.36	493.344	273.361	219.983	80.4736	134.666	25.5514		0	519	12	542	274.794	470.129	421.375	48.7538	11.5702	65.7627	93.5327			FAK	X	PYK	Protein kinase - Non-receptor protein-tyrosine	Protein-tyrosine kinase	TK	Fak
822	408	PK020-3	FAK (PTK2)	S722	Focal adhesion protein-tyrosine kinase	0	480	14	410	191.06	335.72				0	59	12	650	30.55	53.3774							0	456	16	495	217.8	372.621								FAK	X	PYK	Protein kinase - Non-receptor protein-tyrosine	Protein-tyrosine kinase	TK	Fak
823	409	PK024	FAK (PTK2)	S910	Focal adhesion protein-tyrosine kinase	0	44	10	659	22.406	39.3706	42.1873	2.81671	6.67666	0	44	14	661	19.83	34.6473	33.4924	1.15491	3.44828	10.1249	-20.6104		0	266	12	352	89.408	152.963	150.544	2.41913	1.60693	8.28359	256.846			FAK	X	PYK	Protein kinase - Non-receptor protein-tyrosine	Protein-tyrosine kinase	TK	Fak
824	409	PK024	FAK (PTK2)	S910	Focal adhesion protein-tyrosine kinase	0	48	10	674	25.612	45.004				0	38	10	661	18.508	32.3375							0	234	12	390	86.58	148.125								FAK	X	PYK	Protein kinase - Non-receptor protein-tyrosine	Protein-tyrosine kinase	TK	Fak
825	410	PN749	FASN (FAS)	Y45	Fatty acid synthase	0	6948	16	706	4893.99	8599.46	8433.73	165.736	1.96516	0	7030	20	710	4977.1	8696.06	8427.92	268.143	3.18161	5.14676	-0.0688412		0	6951	20	782	5420.04	9272.83	9177.42	95.4153	1.03968	3.00483	8.81805
826	410	PN749	FASN (FAS)	Y45	Fatty acid synthase	0	6366	16	741	4705.35	8267.99				0	6896	18	679	4670.16	8159.78							0	7094	16	750	5308.5	9082
827	411	PN698	FASN (FAS)	S207	Fatty acid synthase	0	9306	16	764	7097.56	12471.5	11297.9	1173.58	10.3876	0	5788	18	711	4102.47	7167.9	10262.7	3094.78	30.1557	40.5433	-9.16272		0	8957	20	789	7051.29	12063.6	12051.4	12.2607	0.101737	10.4894	6.66949						Enzyme - Fatty acid synthesis
828	411	PN698	FASN (FAS)	S207	Fatty acid synthase	0	7038	20	821	5761.78	10124.3				0	10594	20	723	7645	13357.5							0	8560	20	824	7036.96	12039.1											Enzyme - Fatty acid synthesis
829	412	PN750	FBPase (FBP1)	S88	Fructose-1,6-bisphosphatase isoform 1	0	14770	16	685	10106.5	17758.6	17848.4	89.8341	0.503317	0	15424	20	674	10382.3	18140.1	18190.5	50.3582	0.276839	0.780156	1.91637		0	16068	20	716	11490.4	19658.2	19615.8	42.3912	0.216108	0.719424	9.90219
830	412	PN750	FBPase (FBP1)	S88	Fructose-1,6-bisphosphatase isoform 1	0	14728	18	694	10208.7	17938.3				0	15600	18	670	10439.9	18240.8							0	15868	22	722	11440.8	19573.4
831	413	PN699	FBPase (FBP1)	Y265	Fructose-1,6-bisphosphatase isoform 1	0	9490	14	654	6197.3	10889.6	10826.5	63.0324	0.582202	0	10130	16	669	6766.27	11822.1	10986.1	836.03	7.6099	8.1921	1.4737		0	9886	14	705	6959.76	11907	11940.2	33.1082	0.277285	0.859487	10.286
832	413	PN699	FBPase (FBP1)	Y265	Fructose-1,6-bisphosphatase isoform 1	0	9370	18	655	6125.56	10763.5				0	9294	14	626	5809.28	10150.1							0	9955	14	704	6998.46	11973.3
833	414	PN700	FBPase 2 (FBP2)	Y216	Fructose-1,6-bisphosphatase isoform 2	0	5503	14	703	3858.77	6780.42	6766.05	14.3708	0.212396	0	5973	14	749	4463.29	7798.33	7516.95	281.381	3.74329	3.95569	11.098		0	6030	20	718	4315.18	7382.59	7727.04	344.452	4.45775	4.67015	14.2031
834	414	PN700	FBPase 2 (FBP2)	Y216	Fructose-1,6-bisphosphatase isoform 2	0	5388	14	715	3842.41	6751.68				0	5814	14	714	4141.2	7235.57							0	6026	16	785	4717.85	8071.49
835	415	PN751	FBPase 2 (FBP2)	Y259	Fructose-1,6-bisphosphatase isoform 2	0	5562	12	648	3596.4	6319.4	7050.19	730.79	10.3655	0	5924	16	663	3917	6843.85	6486.61	357.234	5.50725	15.8728	-7.9938		0	5471	12	665	3630.24	6210.76	6450.07	239.317	3.7103	14.0758	-8.51211
836	415	PN751	FBPase 2 (FBP2)	Y259	Fructose-1,6-bisphosphatase isoform 2	0	5748	12	772	4428.19	7780.98				0	5556	14	633	3508.09	6129.38							0	5764	14	680	3910	6689.39
837	416	PK630	Fer (TYK3)	Y402	Fer (fps/fes related) protein-tyrosine kinase	0	2698	12	694	1864.08	3275.47	3444.2	168.73	4.89896	0	2764	16	703	1931.84	3375.35	3305.85	69.4937	2.10214	7.0011	-4.01679		0	2966	16	759	2239.05	3830.66	3725.45	105.205	2.82394	7.72291	8.16605			FER	X	PYK	Protein kinase - Non-receptor-tyrosine kinase	Protein-tyrosine kinase	TK	Fer
838	416	PK630	Fer (TYK3)	Y402	Fer (fps/fes related) protein-tyrosine kinase	0	2620	14	789	2056.13	3612.93				0	2726	14	683	1852.3	3236.36							0	2862	14	743	2116.06	3620.25								FER	X	PYK	Protein kinase - Non-receptor-tyrosine kinase	Protein-tyrosine kinase	TK	Fer
839	417	NK061	Fes	Pan-specific	Fes/Fps protein-tyrosine kinase	0	154	10	487	70.128	123.225	125.534	2.30889	1.83925	0	174	12	437	70.794	123.692	120.007	3.68488	3.07054	4.90979	-4.40248		0	192	12	537	96.66	165.37	167.447	2.07696	1.24037	3.07962	33.3876			FES	X	PYK	Protein kinase - Non-receptor-tyrosine kinase	Protein-tyrosine kinase	TK	Fer
840	417	NK061	Fes	Pan-specific	Fes/Fps protein-tyrosine kinase	0	157	16	516	72.756	127.843				0	158	12	456	66.576	116.323							0	190	14	563	99.088	169.524								FES	X	PYK	Protein kinase - Non-receptor-tyrosine kinase	Protein-tyrosine kinase	TK	Fer
841	418	PK632	Fes	Y713	Fes/Fps protein-tyrosine kinase	0	2566	20	622	1583.61	2782.64	2766.82	15.8231	0.571889	0	2726	18	582	1576.06	2753.71	2775.72	22.0097	0.792936	1.36482	0.32177		0	3083	22	630	1928.43	3299.24	3255.75	43.4853	1.33565	1.90753	17.6715			FES	X	PYK	Protein kinase - Non-receptor-tyrosine kinase	Protein-tyrosine kinase	TK	Fer
842	418	PK632	Fes	Y713	Fes/Fps protein-tyrosine kinase	0	2570	16	613	1565.6	2750.99				0	2639	14	610	1601.25	2797.73							0	2931	20	645	1877.6	3212.27								FES	X	PYK	Protein kinase - Non-receptor-tyrosine kinase	Protein-tyrosine kinase	TK	Fer
843	419	PK633	Fes	Y713+S716	Fes/Fps protein-tyrosine kinase	0	5653	18	670	3775.45	6634.02	6384.91	249.106	3.90148	0	5796	20	683	3945.01	6892.78	6707.19	185.587	2.76699	6.66848	5.04747		0	4381	18	919	4009.6	6859.78	7276.67	416.883	5.72904	9.63052	13.9666			FES	X	PYK	Protein kinase - Non-receptor-tyrosine kinase	Protein-tyrosine kinase	TK	Fer
844	419	PK633	Fes	Y713+S716	Fes/Fps protein-tyrosine kinase	0	5269	18	665	3491.91	6135.81				0	5591	20	670	3732.57	6521.6							0	5830	20	774	4496.94	7693.55								FES	X	PYK	Protein kinase - Non-receptor-tyrosine kinase	Protein-tyrosine kinase	TK	Fer
845	420	NK062-3	FGFR1	Pan-specific	Fibroblast growth factor receptor-tyrosine kinase 1; Basic fibroblast growth factor receptor 1	0	5630	16	698	3918.57	6885.51	6873.13	12.3738	0.180032	0	5859	18	720	4205.52	7347.95	7205.72	142.225	1.97378	2.15381	4.83899		0	5880	16	770	4515.28	7724.93	7523.19	201.739	2.68156	2.86159	9.45793			FGFR1	X	PYK	Protein kinase - Receptor-tyrosine kinase	Protein-tyrosine kinase	TK	FGFR
846	420	NK062-3	FGFR1	Pan-specific	Fibroblast growth factor receptor-tyrosine kinase 1; Basic fibroblast growth factor receptor 1	0	5140	16	762	3904.49	6860.76				0	5718	16	709	4042.72	7063.5							0	5374	18	799	4279.44	7321.45								FGFR1	X	PYK	Protein kinase - Receptor-tyrosine kinase	Protein-tyrosine kinase	TK	FGFR
847	421	PK634	FGFR1	Y653+Y654	Fibroblast growth factor receptor-tyrosine kinase 1; Basic fibroblast growth factor receptor 1	0	7252	14	697	5044.89	8864.61	8628.29	236.32	2.7389	0	8538	16	698	5948.36	10393.1	9907.06	485.993	4.90552	7.64442	14.8208		0	7238	12	734	5303.88	9074.1	9107.48	33.3802	0.366514	3.10542	5.55382			FGFR1	X	PYK	Protein kinase - Receptor-tyrosine kinase	Protein-tyrosine kinase	TK	FGFR
848	421	PK634	FGFR1	Y653+Y654	Fibroblast growth factor receptor-tyrosine kinase 1; Basic fibroblast growth factor receptor 1	0	6638	14	721	4775.9	8391.96				0	7741	16	698	5392.05	9421.07							0	7076	18	757	5342.91	9140.86								FGFR1	X	PYK	Protein kinase - Receptor-tyrosine kinase	Protein-tyrosine kinase	TK	FGFR
849	422	NK063-4	FGFR2 (BEK)	Pan-specific	Fibroblast growth factor receptor-tyrosine kinase 2 (BEK)	0	5918	14	744	4392.58	7718.4	7587.03	131.376	1.73158	0	6234	16	720	4476.96	7822.21	7323.91	498.306	6.80382	8.53541	-3.46801		0	6093	16	731	4442.29	7600.05	7510.55	89.5001	1.19166	2.92324	-1.008			FGFR2	X	PYK	Protein kinase - Receptor-tyrosine kinase	Protein-tyrosine kinase	TK	FGFR
850	422	NK063-4	FGFR2 (BEK)	Pan-specific	Fibroblast growth factor receptor-tyrosine kinase 2 (BEK)	0	5583	22	763	4243.04	7455.65				0	6121	17	640	3906.56	6825.6							0	5962	20	730	4337.66	7421.05								FGFR2	X	PYK	Protein kinase - Receptor-tyrosine kinase	Protein-tyrosine kinase	TK	FGFR
851	423	NK063-2	FGFR2 (BEK)	Pan-specific	Fibroblast growth factor receptor-tyrosine kinase 2 (BEK)	0	9144	16	794	7247.63	12735.2	13689.5	954.296	6.97103	0	9294	20	805	7465.57	13044	13883.9	839.951	6.04982	13.0208	1.42049		0	9766	18	901	8782.95	15026.2	14796	230.187	1.55573	8.52676	8.08355			FGFR2	X	PYK	Protein kinase - Receptor-tyrosine kinase	Protein-tyrosine kinase	TK	FGFR
852	423	NK063-2	FGFR2 (BEK)	Pan-specific	Fibroblast growth factor receptor-tyrosine kinase 2 (BEK)	0	9120	12	915	8333.82	14643.7				0	9616	18	878	8427.04	14723.9							0	9878	24	864	8513.86	14565.9								FGFR2	X	PYK	Protein kinase - Receptor-tyrosine kinase	Protein-tyrosine kinase	TK	FGFR
853	424	PK635	FGFR2 (BEK)	Y656+Y657	Fibroblast growth factor receptor-tyrosine kinase 2 (BEK)	0	6270	21	756	4724.24	8301.19	8390.57	89.3825	1.06527	0	6910	17	741	5107.71	8924.27	8763.03	161.246	1.84007	2.90535	4.43896		0	6700	19	785	5244.59	8972.65	8942.95	29.7011	0.332117	1.39739	6.58333			FGFR2	X	PYK	Protein kinase - Receptor-tyrosine kinase	Protein-tyrosine kinase	TK	FGFR
854	424	PK635	FGFR2 (BEK)	Y656+Y657	Fibroblast growth factor receptor-tyrosine kinase 2 (BEK)	0	5976	18	810	4825.98	8479.96				0	6416	14	769	4923.14	8601.78							0	6508	20	803	5209.86	8913.25								FGFR2	X	PYK	Protein kinase - Receptor-tyrosine kinase	Protein-tyrosine kinase	TK	FGFR
855	425	NK236-2	FGFR3	Pan-specific	Fibroblast growth factor receptor 3	0	5488	16	708	3874.18	6807.5	6916.62	109.126	1.57773	0	5856	16	753	4397.52	7683.41	7600.79	82.6223	1.08702	2.66476	9.89166		0	5678	16	742	4201.2	7187.59	7343.36	155.769	2.12122	3.69895	6.16978			FGFR3	X	PYK	Protein kinase - Receptor-tyrosine kinase	Protein-tyrosine kinase	TK	FGFR
856	425	NK236-2	FGFR3	Pan-specific	Fibroblast growth factor receptor 3	0	5329	12	752	3998.38	7025.75				0	5738	16	752	4302.94	7518.17							0	5716	16	769	4383.3	7499.13								FGFR3	X	PYK	Protein kinase - Receptor-tyrosine kinase	Protein-tyrosine kinase	TK	FGFR
857	426	NK236-3	FGFR3	Pan-specific	Fibroblast growth factor receptor 3	0	5016	14	654	3271.31	5748.17	5817.87	69.7043	1.19811	0	5250	18	666	3484.51	6088.19	5837.95	250.247	4.28655	5.48466	0.345015		0	5242	14	703	3675.28	6287.83	6313.97	26.1425	0.414042	1.61215	8.52713			FGFR3	X	PYK	Protein kinase - Receptor-tyrosine kinase	Protein-tyrosine kinase	TK	FGFR
858	426	NK236-3	FGFR3	Pan-specific	Fibroblast growth factor receptor 3	0	4789	16	702	3350.65	5887.58				0	4902	12	654	3198.06	5587.7							0	5202	19	715	3705.84	6340.11								FGFR3	X	PYK	Protein kinase - Receptor-tyrosine kinase	Protein-tyrosine kinase	TK	FGFR
859	427	PK636	FGFR3	Y647+Y648	Fibroblast growth factor receptor 3	0	7594	18	691	5235.02	9198.69	9100.25	98.4424	1.08175	0	8264	18	774	6382.4	11151.4	10085.2	1066.23	10.5723	11.654	10.8233		0	7802	14	741	5770.91	9873.11	9917.92	44.8069	0.451778	1.53353	8.98509			FGFR3	X	PYK	Protein kinase - Receptor-tyrosine kinase	Protein-tyrosine kinase	TK	FGFR
860	427	PK636	FGFR3	Y647+Y648	Fibroblast growth factor receptor 3	0	7572	16	678	5122.97	9001.81				0	7686	16	673	5161.91	9018.97							0	7845	18	744	5823.29	9962.72								FGFR3	X	PYK	Protein kinase - Receptor-tyrosine kinase	Protein-tyrosine kinase	TK	FGFR
861	428	PK637	FGFR3	Y647+Y648	Fibroblast growth factor receptor 3	0	5403	20	658	3542.01	6223.84	6068.76	155.081	2.55539	0	4174	18	853	3545.07	6194	5931.7	262.295	4.42193	6.97732	-2.25841		0	5624	16	702	3936.82	6735.27	6860.15	124.878	1.82034	4.37573	13.0403			FGFR3	X	PYK	Protein kinase - Receptor-tyrosine kinase	Protein-tyrosine kinase	TK	FGFR
862	428	PK637	FGFR3	Y647+Y648	Fibroblast growth factor receptor 3	0	5316	16	635	3365.5	5913.68				0	5316	14	612	3244.82	5669.41							0	5918	18	692	4082.8	6985.02								FGFR3	X	PYK	Protein kinase - Receptor-tyrosine kinase	Protein-tyrosine kinase	TK	FGFR
863	429	NK239-3	FGFR4	Pan-specific	Fibroblast growth factor receptor 4	0	2694	12	608	1630.66	2865.3	3170.07	304.763	9.61378	0	2779	16	621	1715.82	2997.91	3136.83	138.923	4.42876	14.0425	-1.04826		0	2960	10	685	2020.75	3457.18	3453.38	3.80662	0.110229	9.72401	8.93707			FGFR4	X	PYK	Protein kinase - Receptor-tyrosine kinase	Protein-tyrosine kinase	TK	FGFR
864	429	NK239-3	FGFR4	Pan-specific	Fibroblast growth factor receptor 4	0	2884	18	690	1977.54	3474.83				0	2753	16	685	1874.85	3275.76							0	3067	12	660	2016.3	3449.57								FGFR4	X	PYK	Protein kinase - Receptor-tyrosine kinase	Protein-tyrosine kinase	TK	FGFR
865	430	NK268-1	Fgr	Pan-specific	Gardner-Rasheed feline sarcoma viral (v-fgr) oncogene	0	11061	18	690	7619.67	13388.9	13313.4	75.4765	0.566921	0	11822	18	628	7412.91	12952	12826.2	125.795	0.98077	1.54769	-3.65982		0	10856	22	734	7952.16	13604.9	14085.5	480.613	3.41211	3.97903	5.79933			FGR	X	PYK	Protein kinase - Non-receptor-tyrosine kinase	Protein-tyrosine kinase	TK	Src
866	430	NK268-1	Fgr	Pan-specific	Gardner-Rasheed feline sarcoma viral (v-fgr) oncogene	0	9959	20	758	7533.76	13237.9				0	11761	18	619	7268.92	12700.4							0	11024	24	774	8514	14566.1								FGR	X	PYK	Protein kinase - Non-receptor-tyrosine kinase	Protein-tyrosine kinase	TK	Src
867	431	PK638	Fgr	Y208+Y209	Gardner-Rasheed feline sarcoma viral (v-fgr) oncogene	0	4671	14	910	4237.87	7446.56	7272.44	174.124	2.39431	0	5488	20	712	3893.22	6802.29	6616.5	185.783	2.80788	5.20218	-9.01944		0	6024	24	787	4722	8078.59	7854.54	224.052	2.85251	5.24682	8.00427			FGR	X	PYK	Protein kinase - Non-receptor-tyrosine kinase	Protein-tyrosine kinase	TK	Src
868	431	PK638	Fgr	Y208+Y209	Gardner-Rasheed feline sarcoma viral (v-fgr) oncogene	0	5134	14	789	4039.68	7098.31				0	5291	18	698	3680.55	6430.72							0	5680	20	788	4460.08	7630.49								FGR	X	PYK	Protein kinase - Non-receptor-tyrosine kinase	Protein-tyrosine kinase	TK	Src
869	432	PK639	Fgr	Y412	Gardner-Rasheed feline sarcoma viral (v-fgr) oncogene	0	3972	20	737	2912.62	5117.91	5096.94	20.9663	0.41135	0	4046	20	734	2955.08	5163.17	4921.23	241.94	4.91626	5.32761	-3.44746		0	4090	22	800	3254.4	5567.76	5543.86	23.9056	0.431209	0.842559	8.76829			FGR	X	PYK	Protein kinase - Non-receptor-tyrosine kinase	Protein-tyrosine kinase	TK	Src
870	432	PK639	Fgr	Y412	Gardner-Rasheed feline sarcoma viral (v-fgr) oncogene	0	3640	20	798	2888.76	5075.98				0	3748	18	718	2678.14	4679.29							0	4040	22	803	3226.45	5519.95								FGR	X	PYK	Protein kinase - Non-receptor-tyrosine kinase	Protein-tyrosine kinase	TK	Src
871	435	NK240-1	Flt3 (STK1)	Pan-specific	Fetal liver fms-related tyrosine kinase 3; Receptor-type tyrosine-protein kinase FLT3	0	7414	18	781	5776.28	10149.8	10143.4	6.40656	0.0631601	0	7752	18	762	5893.31	10296.9	9970.21	326.665	3.27641	3.33957	-1.707		0	7340	22	871	6373.98	10904.9	11178.9	273.986	2.45093	2.51409	10.2086			FLT3	X	PYK	Protein kinase - Receptor-tyrosine kinase	Protein-tyrosine kinase	TK	PDGFR
872	435	NK240-1	Flt3 (STK1)	Pan-specific	Fetal liver fms-related tyrosine kinase 3; Receptor-type tyrosine-protein kinase FLT3	0	6540	14	884	5768.98	10137				0	7388	19	749	5519.38	9643.55							0	7768	20	864	6694.27	11452.8								FLT3	X	PYK	Protein kinase - Receptor-tyrosine kinase	Protein-tyrosine kinase	TK	PDGFR
873	436	NK240-2	Flt3 (STK1)	Pan-specific	Fetal liver fms-related tyrosine kinase 3; Receptor-type tyrosine-protein kinase FLT3	0	2951	19	666	1952.71	3431.2	3480.15	48.9436	1.40637	0	2412	18	655	1568.07	2739.76	3477.01	737.253	21.2037	22.61	-0.0901284		0	3278	24	709	2307.09	3947.06	4427.75	480.69	10.8563	12.2627	27.2288			FLT3	X	PYK	Protein kinase - Receptor-tyrosine kinase	Protein-tyrosine kinase	TK	PDGFR
874	436	NK240-2	Flt3 (STK1)	Pan-specific	Fetal liver fms-related tyrosine kinase 3; Receptor-type tyrosine-protein kinase FLT3	0	2756	16	733	2008.42	3529.09				0	3380	16	717	2411.99	4214.26							0	3584	20	805	2869.02	4908.44								FLT3	X	PYK	Protein kinase - Receptor-tyrosine kinase	Protein-tyrosine kinase	TK	PDGFR
875	437	PK640	Flt3 (STK1)	Y842	Fetal liver fms-related tyrosine kinase 3; Receptor-type tyrosine-protein kinase FLT3	0	94	12	299	24.518	43.0817	44.8195	1.73782	3.87737	0	91	12	357	28.203	49.2767	44.2072	5.06954	11.4677	15.3451	-1.36633		0	114	16	367	35.966	61.5321	59.6656	1.86653	3.12832	7.00568	33.124			FLT3	X	PYK	Protein kinase - Receptor-tyrosine kinase	Protein-tyrosine kinase	TK	PDGFR
876	437	PK640	Flt3 (STK1)	Y842	Fetal liver fms-related tyrosine kinase 3; Receptor-type tyrosine-protein kinase FLT3	0	82	10	368	26.496	46.5574				0	84	14	320	22.4	39.1376							0	94	12	412	33.784	57.7991								FLT3	X	PYK	Protein kinase - Receptor-tyrosine kinase	Protein-tyrosine kinase	TK	PDGFR
877	438	NN044	Fos	Pan-specific	Fos-c FBJ murine osteosarcoma oncoprotein-related transcription factor	0	527	14	558	286.254	502.99	526.878	23.8875	4.53379	0	556	14	576	312.192	545.467	499.197	46.2698	9.26884	13.8026	-5.25378		0	563	14	590	323.91	554.159	584.362	30.2032	5.16858	9.70237	10.9103						Transcription protein					X
878	438	NN044	Fos	Pan-specific	Fos-c FBJ murine osteosarcoma oncoprotein-related transcription factor	0	525	12	611	313.443	550.765				0	470	12	566	259.228	452.927							0	600	14	613	359.218	614.565											Transcription protein					X
879	439	PN033	Fos	T232	Proto-oncogene c-Fos	0	1004	12	380	376.96	662.374	584.903	77.4708	13.2451	0	1186	16	401	469.17	819.741	552.732	267.009	48.3073	61.5523	-5.50035		0	868	12	408	349.248	597.508	590.487	7.02129	1.18907	14.4341	0.954585						Transcription protein					X
880	439	PN033	Fos	T232	Proto-oncogene c-Fos	0	766	12	383	288.782	507.432				0	486	12	345	163.53	285.722							0	884	14	392	341.04	583.465											Transcription protein					X
881	440	PN588	Fos	T232	Proto-oncogene c-Fos	0	10564	16	651	6866.75	12065.9	12942.7	876.857	6.77489	0	12013	24	703	8428.27	14726	13815.4	910.616	6.59132	13.3662	6.7423		0	11032	20	713	7851.56	13432.8	13446.9	14.0871	0.104761	6.87965	3.89494						Transcription protein					X
882	440	PN588	Fos	T232	Proto-oncogene c-Fos	0	10896	18	723	7864.79	13819.6				0	11416	18	648	7385.9	12904.8							0	11246	22	701	7868.02	13460.9											Transcription protein					X
883	441	PN589	Fos	S362+S363	Proto-oncogene c-Fos	0	19694	18	722	14206.1	24962.2	27068.1	2105.95	7.78019	0	18461	19	752	13868.4	24231.1	25682.7	1451.65	5.65226	13.4324	-5.11821		0	19966	16	769	15341.5	26247	23924.7	2322.27	9.70658	17.4868	-11.613						Transcription protein					X
884	441	PN589	Fos	S362+S363	Proto-oncogene c-Fos	0	20243	20	821	16603.1	29174.1				0	20948	18	742	15530.1	27134.4							0	12721	18	994	12626.8	21602.4											Transcription protein					X
885	442	PN590	FOXK1	S441+S445	Forkhead box protein K1	0	9240	12	710	6551.88	11512.6	11619.7	107.131	0.921978	0	9806	14	732	7167.74	12523.6	12158.4	365.217	3.00383	3.92581	4.63544		0	9209	14	746	6859.47	11735.5	11349	386.453	3.40517	4.32715	-2.32996						Transcription protein					X
886	442	PN590	FOXK1	S441+S445	Forkhead box protein K1	0	9469	16	706	6673.82	11726.9				0	9784	16	691	6749.69	11793.2							0	9318	18	689	6407.7	10962.6											Transcription protein					X
887	443	PN591	FOXK2	S424+S428	Forkhead box protein K2	0	4444	14	687	3043.41	5347.72	5370.78	23.0661	0.429473	0	4948	18	711	3505.23	6124.39	6354.21	229.82	3.61681	4.04629	18.3107		0	5282	16	809	4260.19	7288.52	6977.2	311.32	4.46197	4.89144	29.9102						Transcription protein					X
888	443	PN591	FOXK2	S424+S428	Forkhead box protein K2	0	4100	18	752	3069.66	5393.85				0	5316	16	711	3768.3	6584.03							0	5374	22	728	3896.26	6665.88											Transcription protein					X
889	444	PN592	FOXM1	T611	Forkhead box protein M1	0	8452	18	739	6232.73	10951.8	10220.3	731.553	7.15787	0	9058	22	732	6614.35	11556.7	10532.8	1023.86	9.72066	16.8785	3.05836		0	8378	22	798	6668.09	11408	10814.9	593.181	5.48487	12.6427	5.81783						Transcription protein					X
890	444	PN592	FOXM1	T611	Forkhead box protein M1	0	7656	18	707	5400.07	9488.71				0	8202	18	665	5442.36	9508.97							0	8437	22	710	5974.65	10221.7											Transcription protein					X
891	433	PN194	FOXO1A (FKHR)	S256	Forkhead box protein O1	0	760	12	321	240.108	421.905	379.177	42.7277	11.2685	0	1438	12	304	433.504	757.425	603.181	154.244	25.5718	36.8403	59.0761		0	760	14	377	281.242	481.16	426.183	54.9779	12.9001	24.1686	12.3966						Transcription protein; Nuclear receptor co-regulator					X
892	433	PN194	FOXO1A (FKHR)	S256	Forkhead box protein O1	0	587	12	333	191.475	336.45				0	820	12	318	256.944	448.936							0	600	12	369	216.972	371.205											Transcription protein; Nuclear receptor co-regulator					X
893	434	PN195	FOXO1A (FKHR)	S319	Forkhead box protein O1	0	466	12	327	148.458	260.863	226.371	34.491	15.2365	0	651	18	288	182.304	318.524	276.568	41.9568	15.1705	30.407	22.1742		0	535	14	343	178.703	305.732	284.293	21.4394	7.54131	22.7778	25.587						Transcription protein; Nuclear receptor co-regulator					X
894	434	PN195	FOXO1A (FKHR)	S319	Forkhead box protein O1	0	348	12	325	109.2	191.88				0	443	14	313	134.277	234.611							0	476	16	334	153.64	262.854											Transcription protein; Nuclear receptor co-regulator					X
895	445	PN593	FOXO1A (FKHR)	S256	Forkhead box protein O1	0	3540	14	598	2108.55	3705.03	3803.79	98.7622	2.59642	0	4263	22	586	2485.23	4342.22	4125.03	217.195	5.26528	7.8617	8.44524		0	3738	16	660	2456.52	4202.72	4238.17	35.4555	0.836575	3.43299	11.4197						Transcription protein; Nuclear receptor co-regulator					X
896	445	PN593	FOXO1A (FKHR)	S256	Forkhead box protein O1	0	3372	12	661	2220.96	3902.55				0	3897	14	576	2236.61	3907.84							0	4002	18	627	2497.97	4273.63											Transcription protein; Nuclear receptor co-regulator					X
897	446	PN594	FOXO1A (FKHR)	S319	Forkhead box protein O1	0	5162	20	775	3985.05	7002.32	6683	319.32	4.7781	0	5334	18	795	4226.22	7384.12	6821.12	562.991	8.25364	13.0317	2.06683		0	5390	20	835	4483.95	7671.33	7603.49	67.8374	0.892188	5.67029	13.7736						Transcription protein; Nuclear receptor co-regulator					X
898	446	PN594	FOXO1A (FKHR)	S319	Forkhead box protein O1	0	4675	14	777	3621.6	6363.68				0	4781	18	752	3581.78	6258.13							0	5073	16	871	4404.65	7535.65											Transcription protein; Nuclear receptor co-regulator					X
899	447	PN595	FOXO1A (FKHR)	S329	Forkhead box protein O1	0	13510	18	825	11130.9	19558.6	18954.4	604.255	3.18794	0	14046	20	786	11024.4	19262.1	19064.5	197.584	1.0364	4.22434	0.5809		0	11906	19	908	10793.4	18465.8	19930.2	1464.44	7.34783	10.5358	5.14845						Transcription protein; Nuclear receptor co-regulator					X
900	447	PN595	FOXO1A (FKHR)	S329	Forkhead box protein O1	0	12881	20	812	10443.1	18350.1				0	13298	16	813	10798.3	18866.9							0	13702	20	914	12505.3	21394.7											Transcription protein; Nuclear receptor co-regulator					X
901	448	PN596	FOXO3 (FKHRL1)	T32	Forkhead box protein O3	0	6834	18	677	4614.43	8108.23	8890.58	782.345	8.79971	0	6984	24	707	4920.72	8597.56	8928.97	331.412	3.71165	12.5114	0.431787		0	6919	18	745	5141.24	8795.85	8894.63	98.7797	1.11055	9.91026	0.0456052						Transcription protein					X
902	448	PN596	FOXO3 (FKHRL1)	T32	Forkhead box protein O3	0	6829	16	808	5504.9	9672.92				0	7778	18	683	5300.08	9260.38							0	7168	16	735	5256.72	8993.41											Transcription protein					X
903	449	PN597	FOXO3 (FKHRL1)	S294	Forkhead box protein O3	0	13252	14	729	9650.5	16957.3	17305	347.664	2.00904	0	13426	14	776	10407.7	18184.5	16913.9	1270.59	7.5121	9.52113	-2.25999		0	12842	18	755	9682.12	16564.6	17057.8	493.245	2.89161	4.90064	-1.42847						Transcription protein					X
904	449	PN597	FOXO3 (FKHRL1)	S294	Forkhead box protein O3	0	13080	16	769	10046.2	17652.7				0	13204	18	679	8953.29	15643.3							0	13225	22	777	10258.7	17551.1											Transcription protein					X
905	450	PN599	FRA1	S265	Fos-related antigen 1	0	7650	16	679	5183.49	9108.15	9298.61	190.466	2.04833	0	8416	18	651	5467.1	9552.2	9082.85	469.342	5.16734	7.21567	-2.32033		0	7726	18	719	5542.05	9481.57	9172.6	308.968	3.36837	5.4167	-1.35513						Transcription protein					X
906	450	PN599	FRA1	S265	Fos-related antigen 1	0	7294	16	742	5400.28	9489.08				0	7550	12	654	4929.85	8613.51							0	7678	14	676	5180.86	8863.64											Transcription protein					X
907	451	NK269-1	Frk	Pan-specific	Fyn-related kinase; Tyrosine-protein kinase FRK	0	2444	10	628	1528.55	2685.89	2776.56	90.6705	3.26557	0	2412	12	603	1447.2	2528.57	2522.91	5.65661	0.224209	3.48978	-9.13532		0	2718	10	695	1882.06	3219.91	3297.34	77.431	2.34829	5.61386	18.7562			FRK	X	PYK	Protein kinase - Non-receptor-tyrosine kinase	Protein-tyrosine kinase	TK	Src
908	451	NK269-1	Frk	Pan-specific	Fyn-related kinase; Tyrosine-protein kinase FRK	0	2433	12	674	1631.75	2867.23				0	2031	16	715	1440.72	2517.26							0	2836	14	699	1972.58	3374.77								FRK	X	PYK	Protein kinase - Non-receptor-tyrosine kinase	Protein-tyrosine kinase	TK	Src
909	452	NK269-2	Frk	Pan-specific	Fyn-related kinase; Tyrosine-protein kinase FRK	0	5502	14	686	3764.77	6615.25	6324.13	291.117	4.60327	0	5902	16	656	3861.22	6746.38	6310.35	436.03	6.90976	11.513	-0.218023		0	5860	14	728	4255.89	7281.15	7127.42	153.73	2.15688	6.76016	12.7019			FRK	X	PYK	Protein kinase - Non-receptor-tyrosine kinase	Protein-tyrosine kinase	TK	Src
910	452	NK269-2	Frk	Pan-specific	Fyn-related kinase; Tyrosine-protein kinase FRK	0	5360	12	642	3433.42	6033.02				0	5317	14	634	3362.1	5874.32							0	5879	14	695	4076.18	6973.69								FRK	X	PYK	Protein kinase - Non-receptor-tyrosine kinase	Protein-tyrosine kinase	TK	Src
911	453	PK641	Frk	Y387	Fyn-related kinase; Tyrosine-protein kinase FRK	0	10712	16	689	7369.54	12949.4	13115.8	166.46	1.26915	0	10313	18	653	6722.64	11745.9	11204	541.877	4.83645	6.10561	-14.5764		0	10958	20	725	7930.05	13567.1	13836.5	269.483	1.94762	3.21677	5.49496			FRK	X	PYK	Protein kinase - Non-receptor-tyrosine kinase	Protein-tyrosine kinase	TK	Src
912	453	PK641	Frk	Y387	Fyn-related kinase; Tyrosine-protein kinase FRK	0	10738	16	705	7559.01	13282.3				0	9262	16	660	6102.36	10662.1							0	11162	20	740	8245.08	14106								FRK	X	PYK	Protein kinase - Non-receptor-tyrosine kinase	Protein-tyrosine kinase	TK	Src
913	454	PK642	Frk	Y497	Fyn-related kinase; Tyrosine-protein kinase FRK	0	4418	12	627	2762.56	4854.23	4809.72	44.5068	0.925351	0	4486	14	617	2759.22	4820.96	4830.74	9.77742	0.2024	1.12775	0.436926		0	4580	14	671	3063.79	5241.65	5206.5	35.1527	0.675169	1.60052	8.24952			FRK	X	PYK	Protein kinase - Non-receptor-tyrosine kinase	Protein-tyrosine kinase	TK	Src
914	454	PK642	Frk	Y497	Fyn-related kinase; Tyrosine-protein kinase FRK	0	4278	14	636	2711.9	4765.21				0	4372	16	636	2770.42	4840.51							0	4584	18	662	3022.69	5171.35								FRK	X	PYK	Protein kinase - Non-receptor-tyrosine kinase	Protein-tyrosine kinase	TK	Src
915	455	NN415-1	FRS2	Pan-specific	Fibroblast growth factor receptor substrate 2	0	374	10	512	186.368	327.476	336.388	8.91225	2.64939	0	504	12	485	238.62	416.92	368.288	48.632	13.2049	15.8543	9.48318		0	448	12	523	228.028	390.12	415.242	25.122	6.04997	8.69936	23.4412
916	455	NN415-1	FRS2	Pan-specific	Fibroblast growth factor receptor substrate 2	0	378	10	534	196.512	345.3				0	390	12	484	182.952	319.657							0	472	14	562	257.396	440.364
917	456	PN146	FRS2	Y349	Fibroblast growth factor receptor substrate 2	0	85	10	363	27.225	47.8383	56.4492	8.6109	15.2542	0	303	12	237	68.967	120.5	96.3423	24.1579	25.075	40.3293	70.6708		0	224	12	242	51.304	87.773	79.8279	7.94515	9.95285	25.2071	41.4153
918	456	PN146	FRS2	Y349	Fibroblast growth factor receptor substrate 2	0	199	12	198	37.026	65.0601				0	194	12	227	41.314	72.1844							0	220	12	202	42.016	71.8827
919	457	PK643	Fused (STK36)	S159	Serine/threonine-protein kinase 36	0	2561	14	712	1813.46	3186.52	3240.24	53.7125	1.65767	0	2958	16	679	1997.62	3490.27	3245.82	244.451	7.53127	9.18894	0.172277		0	2808	20	767	2138.4	3658.46	3661.97	3.51407	0.0959611	1.75363	13.0156			Fused	X	PYK	Protein kinase - Non-receptor protein-serine/threonine	Protein-serine/threonine kinase	Other	ULK
920	457	PK643	Fused (STK36)	S159	Serine/threonine-protein kinase 36	0	2618	18	721	1874.6	3293.95				0	2470	16	700	1717.8	3001.37							0	2824	16	763	2142.5	3665.48								Fused	X	PYK	Protein kinase - Non-receptor protein-serine/threonine	Protein-serine/threonine kinase	Other	ULK
921	458	NK065	Fyn	Pan-specific	Fyn proto-oncogene-encoded protein-tyrosine kinase	0	160	10	519	77.85	136.794	139.459	2.66559	1.91137	0	120	12	515	55.62	97.1801	101.576	4.39599	4.32778	6.23916	-27.1644		0	194	12	576	104.832	179.351	188.169	8.81768	4.68605	6.59742	34.9271			FYN	X	PYK	Protein kinase - Non-receptor-tyrosine kinase	Protein-tyrosine kinase	TK	Src
922	458	NK065	Fyn	Pan-specific	Fyn proto-oncogene-encoded protein-tyrosine kinase	0	158	12	554	80.884	142.125				0	130	12	514	60.652	105.972							0	204	14	606	115.14	196.986								FYN	X	PYK	Protein kinase - Non-receptor-tyrosine kinase	Protein-tyrosine kinase	TK	Src
923	459	NK065-2	Fyn	Pan-specific	Fyn proto-oncogene-encoded protein-tyrosine kinase	0	1330	12	532	701.176	1232.07	1331.76	99.6865	7.48534	0	1448	14	559	801.606	1400.58	1326.04	74.5414	5.62137	13.1067	-0.429432		0	1636	18	610	986.98	1688.57	1756.49	67.9238	3.86702	11.3524	31.8928			FYN	X	PYK	Protein kinase - Non-receptor-tyrosine kinase	Protein-tyrosine kinase	TK	Src
924	459	NK065-2	Fyn	Pan-specific	Fyn proto-oncogene-encoded protein-tyrosine kinase	0	1372	12	599	814.64	1431.44				0	1424	14	508	716.28	1251.5							0	1842	16	584	1066.38	1824.41								FYN	X	PYK	Protein kinase - Non-receptor-tyrosine kinase	Protein-tyrosine kinase	TK	Src
925	460	PK186	Fyn	T12	Fyn proto-oncogene-encoded protein-tyrosine kinase	0	86	10	668	50.768	89.2068	109.591	20.3847	18.6006	0	184	20	485	79.54	138.973	128.613	10.361	8.05597	26.6566	17.3563		0	126	14	547	61.264	104.813	111.064	6.25141	5.62864	24.2292	1.344			FYN	X	PYK	Protein kinase - Non-receptor-tyrosine kinase	Protein-tyrosine kinase	TK	Src
926	460	PK186	Fyn	T12	Fyn proto-oncogene-encoded protein-tyrosine kinase	0	144	14	569	73.97	129.976				0	160	16	470	67.68	118.252							0	138	14	553	68.572	117.316								FYN	X	PYK	Protein kinase - Non-receptor-tyrosine kinase	Protein-tyrosine kinase	TK	Src
927	461	PK644	Fyn	Y213+Y214	Fyn proto-oncogene-encoded protein-tyrosine kinase	0	1470	14	534	777.504	1366.19	1519.63	153.441	10.0973	0	1583	12	540	848.34	1482.23	1393.18	89.0538	6.39213	16.4894	-8.32118		0	1858	18	603	1109.52	1898.21	1935.88	37.6625	1.9455	12.0428	27.3912			FYN	X	PYK	Protein kinase - Non-receptor-tyrosine kinase	Protein-tyrosine kinase	TK	Src
928	461	PK644	Fyn	Y213+Y214	Fyn proto-oncogene-encoded protein-tyrosine kinase	0	1652	16	582	952.152	1673.07				0	1534	20	493	746.402	1304.12							0	1962	20	594	1153.55	1973.54								FYN	X	PYK	Protein kinase - Non-receptor-tyrosine kinase	Protein-tyrosine kinase	TK	Src
929	462	PK881	Fyn	Y420	Fyn proto-oncogene-encoded protein-tyrosine kinase	0	10640	16	687	7298.69	12824.9	13074.8	249.935	1.91158	0	11492	18	736	8444.86	14755	13612.9	1142.07	8.3896	10.3012	4.11572		0	10976	18	729	7988.38	13666.9	13905.2	238.38	1.71432	3.6259	6.3514			FYN	X	PYK	Protein kinase - Non-receptor-tyrosine kinase	Protein-tyrosine kinase	TK	Src
930	462	PK881	Fyn	Y420	Fyn proto-oncogene-encoded protein-tyrosine kinase	0	10521	18	722	7583.17	13324.7				0	10687	18	669	7137.56	12470.9							0	11536	22	718	8267.05	14143.6								FYN	X	PYK	Protein kinase - Non-receptor-tyrosine kinase	Protein-tyrosine kinase	TK	Src
931	463	PK645	Fyn	Y531	Fyn proto-oncogene-encoded protein-tyrosine kinase	0	1760	16	598	1042.91	1832.55	1868.39	35.844	1.91844	0	1794	16	558	992.124	1733.45	1620.26	113.195	6.98623	8.90468	-13.2806		0	1940	20	607	1165.44	1993.88	2073.41	79.5233	3.8354	5.75384	10.9727			FYN	X	PYK	Protein kinase - Non-receptor-tyrosine kinase	Protein-tyrosine kinase	TK	Src
932	463	PK645	Fyn	Y531	Fyn proto-oncogene-encoded protein-tyrosine kinase	0	1781	16	614	1083.71	1904.24				0	1586	12	548	862.552	1507.06							0	2006	18	633	1258.4	2152.93								FYN	X	PYK	Protein kinase - Non-receptor-tyrosine kinase	Protein-tyrosine kinase	TK	Src
933	464	PN515	G6PD	Y401	Glucose-6-phosphate 1-dehydrogenase	0	5902	14	690	4062.72	7138.8	7175	36.2078	0.504638	0	6182	14	707	4360.78	7619.21	6980.99	638.226	9.14235	9.64699	-2.70405		0	6214	12	720	4465.44	7639.66	7554.51	85.1486	1.12712	1.63176	5.2893						Enzyme - Glycolysis
934	464	PN515	G6PD	Y401	Glucose-6-phosphate 1-dehydrogenase	0	5706	14	721	4103.93	7211.21				0	5508	16	661	3630.21	6342.76							0	6316	16	693	4365.9	7469.36											Enzyme - Glycolysis
935	465	PN701	G6PD	Y503+Y507	Glucose-6-phosphate 1-dehydrogenase	0	7184	18	785	5625.31	9884.5	10260.6	376.095	3.66544	0	7834	16	822	6426.4	11228.3	10210.7	1017.6	9.96605	13.6315	-0.486302		0	7720	22	883	6797.33	11629.2	11308.1	321.096	2.83953	6.50496	10.2087						Enzyme - Glycolysis
936	465	PN701	G6PD	Y503+Y507	Glucose-6-phosphate 1-dehydrogenase	0	7233	18	839	6053.39	10636.7				0	7090	18	744	5261.57	9193.09							0	7746	18	831	6421.97	10987											Enzyme - Glycolysis
937	466	PN516	Gab1	Y406	GRB2-associated-binding protein 1	0	2010	12	560	1118.88	1966.04	2198.96	232.926	10.5925	0	2466	16	570	1396.5	2439.99	2083.69	356.296	17.0993	27.6918	-5.2421		0	2363	16	583	1368.3	2340.95	2532.82	191.877	7.57561	18.1681	15.1826
938	466	PN516	Gab1	Y406	GRB2-associated-binding protein 1	0	2315	16	602	1384	2431.89				0	1934	18	516	988.656	1727.39							0	2554	18	628	1592.61	2724.7
939	467	PN192	Gab1	Y627	GRB2-associated-binding protein 1	0	540	10	197	104.41	183.464	201.241	17.7771	8.83372	0	625	14	222	135.642	236.996	220.57	16.4256	7.44687	16.2806	9.60512		0	490	10	225	108	184.771	177.127	7.64404	4.31557	13.1493	-11.9826
940	467	PN192	Gab1	Y627	GRB2-associated-binding protein 1	0	450	8	282	124.644	219.018				0	470	10	254	116.84	204.145							0	416	10	244	99.064	169.483
941	468	PN196	GATA1	S142	Transcription factor GATA-1	0	1376	10	254	346.964	609.667	699.2	89.5337	12.8052	0	1540	12	254	388.112	678.115	649.884	28.2315	4.34409	17.1492	-7.0533		0	1464	12	278	403.656	690.591	649.689	40.9028	6.29575	19.1009	-7.0812											X
942	468	PN196	GATA1	S142	Transcription factor GATA-1	0	1426	10	317	448.872	788.734				0	1370	12	262	355.796	621.652							0	1292	12	278	355.84	608.786																X
943	469	PN702	GATA3	S369	Trans-acting T-cell-specific transcription factor GATA-3	0	1600	16	600	950.4	1669.99	1748	78.005	4.46254	0	1636	14	610	989.42	1728.73	1644.47	84.2551	5.12353	9.58606	-5.92237		0	1825	20	657	1185.88	2028.86	1981.32	47.54	2.39941	6.86195	13.3481						DNA-binding; Transcription protein					X
944	469	PN702	GATA3	S369	Trans-acting T-cell-specific transcription factor GATA-3	0	1572	14	667	1039.19	1826				0	1567	14	575	892.975	1560.22							0	1724	14	661	1130.31	1933.78											DNA-binding; Transcription protein					X
945	470	PN225	GATA4	S262	Transcription factor GATA-4	0	226	14	560	118.72	208.608	233.571	24.962	10.6871	0	224	14	557	116.97	204.372	193.097	11.2748	5.83892	16.5261	-17.3282		0	273	14	620	160.58	274.727	282.251	7.52428	2.66581	13.353	20.842											X
946	470	PN225	GATA4	S262	Transcription factor GATA-4	0	260	16	603	147.132	258.533				0	208	16	542	104.064	181.822							0	284	16	632	169.376	289.775																X
947	471	PN600	GATAD2B	T120+S122	Transcriptional repressor p66-beta	0	12925	16	768	9914.11	17420.6	17796.3	375.713	2.11119	0	14415	18	770	11085.7	19369.1	19352.3	16.8012	0.0868178	2.19801	8.74352		0	13772	18	849	11677.1	19977.7	19761.4	216.31	1.09461	3.2058	11.0426						Transcription protein					X
948	471	PN600	GATAD2B	T120+S122	Transcriptional repressor p66-beta	0	13343	16	776	10341.8	18172				0	14699	22	754	11066.5	19335.5							0	14070	18	813	11424.3	19545.1											Transcription protein					X
949	472	NK066	GCK (MAP4K2)	Pan-specific	Germinal centre protein-serine kinase	0	304	10	555	163.17	286.714	280.862	5.8513	2.08333	0	296	14	546	153.972	269.022	264.976	4.04655	1.52714	3.61047	-5.6564		0	361	14	592	205.424	351.448	352.119	0.67065	0.190461	2.27379	25.3705			GCK	X	PSTK	Protein kinase - Non-receptor protein-serine/threonine	Protein-serine/threonine kinase	STE	STE20	KHS
950	472	NK066	GCK (MAP4K2)	Pan-specific	Germinal centre protein-serine kinase	0	294	12	555	156.51	275.011				0	299	14	524	149.34	260.929							0	374	16	576	206.208	352.789								GCK	X	PSTK	Protein kinase - Non-receptor protein-serine/threonine	Protein-serine/threonine kinase	STE	STE20	KHS
951	473	PK646	GCK (MAP4K2)	S170	Germinal centre protein-serine kinase; Mitogen-activated protein kinase kinase kinase kinase 2	0	6128	18	730	4460.3	7837.4	8696.41	859.008	9.87773	0	8414	18	722	6061.91	10591.5	10047.3	544.165	5.41603	15.2938	15.5339		0	5782	26	819	4714.16	8065.19	9477.18	1411.99	14.8988	24.7766	8.97802			GCK	X	PSTK	Protein kinase - Non-receptor protein-serine/threonine	Protein-serine/threonine kinase	STE	STE20	KHS
952	473	PK646	GCK (MAP4K2)	S170	Germinal centre protein-serine kinase; Mitogen-activated protein kinase kinase kinase kinase 2	0	7106	16	767	5438.03	9555.42				0	8052	18	677	5439.02	9503.13							0	7976	20	800	6364.8	10889.2								GCK	X	PSTK	Protein kinase - Non-receptor protein-serine/threonine	Protein-serine/threonine kinase	STE	STE20	KHS
953	474	PK893	GCK (MAP4K2)	S411	Glucokinase	0	11787	18	679	7991.15	14041.6	15292.5	1250.89	8.17976	0	12376	18	684	8452.87	14769	14926.3	157.274	1.05367	9.23344	-2.39502		0	13805	28	705	9712.78	16617	17411.9	794.818	4.56481	12.7446	13.8586			GCK	X	PSTK	Protein kinase - Non-receptor protein-serine/threonine	Protein-serine/threonine kinase	STE	STE20	KHS
954	474	PK893	GCK (MAP4K2)	S411	Glucokinase	0	13145	14	717	9414.93	16543.4				0	13120	20	659	8632.9	15083.5							0	14036	15	759	10641.9	18206.7								GCK	X	PSTK	Protein kinase - Non-receptor protein-serine/threonine	Protein-serine/threonine kinase	STE	STE20	KHS
955	475	PN752	GCLC	S5+S8	Glutamate--cysteine ligase catalytic subunit	0	4150	14	583	2411.29	4236.99	4310.78	73.7931	1.71183	0	4366	16	582	2531.7	4423.42	4237.95	185.477	4.37659	6.08841	-1.68956		0	4502	18	604	2708.34	4633.53	4954.43	320.899	6.47701	8.18884	14.9312
956	475	PN752	GCLC	S5+S8	Glutamate--cysteine ligase catalytic subunit	0	4229	14	592	2495.28	4384.57				0	3974	16	586	2319.39	4052.47							0	4804	16	644	3083.47	5275.33
957	476	PK877	GCN2 (EIF2AK4)	T667	Eukaryotic translation initiation factor 2-alpha kinase 4	0	13250	18	685	9063.92	15926.6	16740.3	813.674	4.86057	0	12519	20	678	8474.32	14806.5	15427.1	620.616	4.0229	8.88347	-7.84474		0	12891	20	722	9292.86	15898.6	16679.2	780.583	4.67998	9.54055	-0.365086			GCN2	X	PSTK	Protein kinase - Non-receptor protein-serine/threonine	Protein-serine/threonine kinase
958	476	PK877	GCN2 (EIF2AK4)	T667	Eukaryotic translation initiation factor 2-alpha kinase 4	0	13283	16	753	9990.05	17554				0	14278	16	644	9184.73	16047.7							0	13882	16	736	10205.4	17459.8								GCN2	X	PSTK	Protein kinase - Non-receptor protein-serine/threonine	Protein-serine/threonine kinase
959	477	NN260-2	GFAP	Pan-specific	Glial fibrillary acidic protein	0	223	6	544	118.048	207.428	149.329	58.0983	38.9061	0	3330	14	341	1130.76	1975.67	1490.92	484.749	32.5133	71.4195	898.414	Possible	0	3111	12	374	1159.03	1982.91	1979.61	3.30021	0.16671	39.0729	1225.67	Priority
960	477	NN260-2	GFAP	Pan-specific	Glial fibrillary acidic protein	0	88	8	649	51.92	91.2311				0	1806	12	321	575.874	1006.18							0	3068	12	378	1155.17	1976.31
961	478	PN034	GFAP	S8	Glial fibrillary acidic protein	0	73	10	648	40.824	71.7338	1068.93	997.198	93.2892	0	3872	10	336	1297.63	2267.24	2032.02	235.219	11.5756	104.865	90.0986		0	3561	12	392	1391.21	2380.14	2240.63	139.502	6.22601	99.5152	109.614
962	478	PN034	GFAP	S8	Glial fibrillary acidic protein	0	3343	12	353	1175.84	2066.13				0	3406	12	303	1028.38	1796.8							0	3499	10	352	1228.13	2101.13
963	479	PN517	GIT1	Y545	ARF GTPase-activating protein GIT1	0	7230	14	676	4878.02	8571.39	8910.96	339.565	3.81065	0	7734	16	691	5333.14	9318.14	9132.91	185.231	2.02817	5.83882	2.49078		0	7964	18	744	5911.82	10114.2	10153.7	39.4588	0.388617	4.19926	13.9457
964	479	PN517	GIT1	Y545	ARF GTPase-activating protein GIT1	0	7492	14	704	5264.51	9250.52				0	7503	16	684	5121.11	8947.68							0	8200	16	728	5957.95	10193.1
965	480	PN178	GluR1	S849	Glutamate receptor 1	0	2672	14	345	917.01	1611.32	873.255	738.067	84.5191	0	2774	10	330	912.12	1593.67	827.499	766.171	92.5888	177.108	-5.23971		0	1966	8	333	652.014	1115.49	1119.37	3.87506	0.346183	84.8653	28.1834
966	480	PN178	GluR1	S849	Glutamate receptor 1	0	126	8	652	76.936	135.188				0	62	8	650	35.1	61.3273							0	1962	8	336	656.544	1123.24
967	481	PN226	GOLGA2 (GM130)	S25	Golgin subfamily A member 2	0	546	14	532	283.024	497.315	508.132	10.817	2.12878	0	678	12	560	372.96	651.641	607.591	44.0508	7.25008	9.37886	19.5734		0	634	10	624	389.376	666.161	635.41	30.7507	4.8395	6.96828	25.0483
968	481	PN226	GOLGA2 (GM130)	S25	Golgin subfamily A member 2	0	548	12	551	295.336	518.949				0	616	12	534	322.536	563.54							0	610	14	593	353.428	604.659
969	483	PN601	GR	S226	Glucocorticoid receptor	0	7268	14	663	4809.4	8450.83	8758.09	307.267	3.50838	0	7258	16	646	4678.33	8174.05	8131.01	43.0392	0.529321	4.0377	-7.16		0	8370	18	738	6163.78	10545.2	10155.9	389.367	3.83391	7.34229	15.9599						Receptor, nuclear; Transcription protein					X
970	483	PN601	GR	S226	Glucocorticoid receptor	0	7064	16	732	5159.14	9065.36				0	7000	18	663	4629.07	8087.97							0	7836	16	730	5708.6	9766.51											Receptor, nuclear; Transcription protein					X
971	484	NK382-1	GRK1 (Rhodopsin kinase)	Pan-specific	Rhodopsin kinase	0	216	12	539	109.956	193.209	191.448	1.76066	0.919654	0	222	14	517	107.536	187.889	192.54	4.65109	2.41565	3.33531	0.570092		0	254	18	585	138.06	236.199	237.904	1.70571	0.716972	1.63663	24.2657			GRK1	X	PSTK	Protein kinase - Non-receptor protein-serine/threonine	Protein-serine/threonine kinase
972	484	NK382-1	GRK1 (Rhodopsin kinase)	Pan-specific	Rhodopsin kinase	0	220	12	519	107.952	189.688				0	232	12	513	112.86	197.191							0	250	11	586	140.054	239.61								GRK1	X	PSTK	Protein kinase - Non-receptor protein-serine/threonine	Protein-serine/threonine kinase
973	485	NK067-2	GRK2 (BARK1, ADRBK1)	Pan-specific	Beta-adrenergic receptor kinase 1	0	424	12	506	208.472	366.316	396.293	29.9769	7.56434	0	437	12	487	206.975	361.63	374.53	12.8997	3.44424	11.0086	-5.49172		0	526	12	575	295.55	505.639	535.601	29.962	5.59408	13.1584	35.1529			GRK2	X	PSTK	Protein kinase - Non-receptor protein-serine/threonine	Protein-serine/threonine kinase
974	485	NK067-2	GRK2 (BARK1, ADRBK1)	Pan-specific	Beta-adrenergic receptor kinase 1	0	466	10	532	242.592	426.27				0	471	10	481	221.741	387.429							0	582	14	582	330.576	565.563								BARK1	X	PSTK	Protein kinase - Non-receptor protein-serine/threonine	Protein-serine/threonine kinase
975	486	NK067	GRK2 (BARK1, ADRBK1)	Pan-specific	G protein-coupled receptor-serine kinase 2	0	350	12	565	190.97	335.562	439.858	104.295	23.7112	0	488	14	559	264.966	462.953	432.067	30.8855	7.14832	30.8595	-1.77119		0	495	18	623	297.171	508.412	509.84	1.4277	0.280028	23.9912	15.9102			BARK1	X	PSTK	Protein kinase - Non-receptor protein-serine/threonine	Protein-serine/threonine kinase
976	486	NK067	GRK2 (BARK1, ADRBK1)	Pan-specific	G protein-coupled receptor-serine kinase 2	0	502	12	632	309.68	544.153				0	433	14	548	229.612	401.182							0	500	18	620	298.84	511.268								BARK1	X	PSTK	Protein kinase - Non-receptor protein-serine/threonine	Protein-serine/threonine kinase
977	117	PK537	GRK2 (BARK1, ADRBK1)	Y356	Beta-adrenergic receptor kinase 1	0	7262	16	708	5130.17	9014.46	8624.13	390.333	4.52605	0	8076	16	788	6351.28	11097.1	10093.1	1003.95	9.94689	14.4729	17.0333		0	7696	16	682	5237.76	8960.98	10143.9	1182.93	11.6615	16.1876	17.6225			BARK1	X	PSTK	Protein kinase - Non-receptor protein-serine/threonine	Protein-serine/threonine kinase	AGC	GRK	BARK
978	117	PK537	GRK2 (BARK1, ADRBK1)	Y356	Beta-adrenergic receptor kinase 1	0	6764	12	694	4685.89	8233.79				0	7944	14	656	5202.08	9089.15							0	8218	14	807	6620.63	11326.8								BARK1	X	PSTK	Protein kinase - Non-receptor protein-serine/threonine	Protein-serine/threonine kinase	AGC	GRK	BARK
979	118	PK536	GRK2 (BARK1, ADRBK1)	S670	Beta-adrenergic receptor kinase 1	0	3190	14	616	1956.42	3437.71	3742.39	304.68	8.14131	0	3197	20	678	2154.01	3763.51	3290.17	473.343	14.3866	22.5279	-12.0838		0	3438	12	540	1850.04	3165.13	3023.67	141.457	4.67834	12.8197	-19.2049			BARK1	X	PSTK	Protein kinase - Non-receptor protein-serine/threonine	Protein-serine/threonine kinase	AGC	GRK	BARK
980	118	PK536	GRK2 (BARK1, ADRBK1)	S670	Beta-adrenergic receptor kinase 1	0	3509	14	659	2303.2	4047.07				0	2992	12	541	1612.18	2816.83							0	3128	14	541	1684.67	2882.21								BARK1	X	PSTK	Protein kinase - Non-receptor protein-serine/threonine	Protein-serine/threonine kinase	AGC	GRK	BARK
981	487	PK025	GRK2 (BARK1, ADRBK1)	S670	G protein-coupled receptor-serine kinase 2	0	408	10	504	200.592	352.47	412.857	60.387	14.6266	0	442	14	522	223.416	390.356	394.834	4.47811	1.13418	15.7608	-4.36536		0	526	14	567	290.304	496.664	493.513	3.15137	0.638559	15.2652	19.5361			BARK1	X	PSTK	Protein kinase - Non-receptor protein-serine/threonine	Protein-serine/threonine kinase
982	487	PK025	GRK2 (BARK1, ADRBK1)	S670	G protein-coupled receptor-serine kinase 2	0	485	10	567	269.325	473.244				0	470	12	499	228.542	399.312							0	522	12	562	286.62	490.361								BARK1	X	PSTK	Protein kinase - Non-receptor protein-serine/threonine	Protein-serine/threonine kinase
983	488	NK067-2	GRK5	Pan-specific	G protein-coupled receptor kinase 5	0	308	8	230	69	121.243	74.3062	46.9369	63.1669	0	436	12	216	91.584	160.017	89.1779	70.8391	79.4357	142.603	20.014		0	346	10	272	91.392	156.357	95.944	60.4132	62.9672	126.134	29.1197			GRK5	X	PSTK	Protein kinase - Non-receptor protein-serine/threonine	Protein-serine/threonine kinase
984	488	NK067-2	GRK5	Pan-specific	G protein-coupled receptor kinase 5	0	32	8	649	15.576	27.3693				0	26	10	656	10.496	18.3388							0	42	10	649	20.768	35.5308								GRK5	X	PSTK	Protein kinase - Non-receptor protein-serine/threonine	Protein-serine/threonine kinase
985	489	NK381-1	GRK7	Pan-specific	Rhodopsin kinase	0	334	12	567	182.574	320.809	383.213	62.4033	16.2843	0	506	12	522	257.868	450.551	424.877	25.6736	6.04259	22.3268	10.8725		0	460	16	598	265.512	454.249	501.525	47.2757	9.42639	25.7106	30.8737			GRK7	X	PSTK	Protein kinase - Non-receptor protein-serine/threonine	Protein-serine/threonine kinase
986	489	NK381-1	GRK7	Pan-specific	Rhodopsin kinase	0	450	12	579	253.602	445.616				0	430	10	544	228.48	399.204							0	516	14	639	320.778	548.8								GRK7	X	PSTK	Protein kinase - Non-receptor protein-serine/threonine	Protein-serine/threonine kinase
987	490	NK069-NK070-3	GSK3a	Pan-specific	Glycogen synthase-serine kinase 3 alpha/beta	0	202	10	612	117.504	206.472	209.57	3.09785	1.4782	0	201	10	605	115.555	201.899	210.727	8.8278	4.18921	5.6674	0.552375		0	202	10	634	121.728	208.257	227.966	19.7089	8.64553	10.1237	8.77825			GSK3a	X	PSTK	Protein kinase - Non-receptor protein-serine/threonine	Protein-serine/threonine kinase	CMGC	GSK
988	490	NK069-NK070-3	GSK3a	Pan-specific	Glycogen synthase-serine kinase 3 alpha/beta	0	204	14	637	121.03	212.667				0	216	10	610	125.66	219.555							0	220	12	696	144.768	247.675								GSK3a	X	PSTK	Protein kinase - Non-receptor protein-serine/threonine	Protein-serine/threonine kinase	CMGC	GSK
989	491	NK069-3	GSK3a	Pan-specific	Glycogen synthase-serine kinase 3 alpha	0	1506	15	629	937.839	1647.92	1804.44	156.515	8.67391	0	1665	14	627	1035.18	1808.68	1741.13	67.5438	3.8793	12.5532	-3.50819		0	1743	20	683	1176.81	2013.33	2119.95	106.619	5.0293	13.7032	17.4856			GSK3a	X	PSTK	Protein kinase - Non-receptor protein-serine/threonine	Protein-serine/threonine kinase	CMGC	GSK
990	491	NK069-3	GSK3a	Pan-specific	Glycogen synthase-serine kinase 3 alpha	0	1514	12	743	1115.99	1960.95				0	1514	15	639	957.861	1673.59							0	1698	10	771	1301.45	2226.57								GSK3a	X	PSTK	Protein kinase - Non-receptor protein-serine/threonine	Protein-serine/threonine kinase	CMGC	GSK
991	492	PK648	GSK3a	T19+S21	Glycogen synthase-serine kinase 3 alpha	0	10443	20	738	7692.17	13516.3	13778.7	262.446	1.90472	0	11678	22	754	8788.62	15355.6	15318.9	36.7632	0.239986	2.1447	11.1776		0	10616	20	830	8794.68	15046.3	15139.8	93.5146	0.617673	2.52239	9.87821			GSK3a	X	PSTK	Protein kinase - Non-receptor protein-serine/threonine	Protein-serine/threonine kinase	CMGC	GSK
992	492	PK648	GSK3a	T19+S21	Glycogen synthase-serine kinase 3 alpha	0	10618	20	754	7990.89	14041.2				0	12018	20	729	8746.54	15282.1							0	11222	22	795	8904	15233.3								GSK3a	X	PSTK	Protein kinase - Non-receptor protein-serine/threonine	Protein-serine/threonine kinase	CMGC	GSK
993	493	PK187	GSK3a	S21	Glycogen synthase-serine kinase 3 alpha	0	24	3	721	15.141	26.605	25.1808	1.42417	5.65577	0	30	6	686	16.464	28.7662	26.2467	2.51948	9.59925	15.255	4.23288		0	32	6	707	18.382	31.4487	30.2186	1.23009	4.07066	9.72643	20.0065			GSK3a	X	PSTK	Protein kinase - Non-receptor protein-serine/threonine	Protein-serine/threonine kinase	CMGC	GSK
994	493	PK187	GSK3a	S21	Glycogen synthase-serine kinase 3 alpha	0	24	4	676	13.52	23.7566				0	24	4	679	13.58	23.7272							0	30	6	706	16.944	28.9885								GSK3a	X	PSTK	Protein kinase - Non-receptor protein-serine/threonine	Protein-serine/threonine kinase	CMGC	GSK
995	494	PK647	GSK3a	S278+Y279	Glycogen synthase-serine kinase 3 alpha	0	8593	19	817	7004.96	12308.7	12029.7	279.033	2.31953	0	11096	18	882	9770.8	17071.7	15679.7	1392.03	8.87791	11.1974	30.3411		0	7218	16	894	6438.59	11015.4	11638.7	623.347	5.35579	7.67532	-3.24993			GSK3a	X	PSTK	Protein kinase - Non-receptor protein-serine/threonine	Protein-serine/threonine kinase	CMGC	GSK
996	494	PK647	GSK3a	S278+Y279	Glycogen synthase-serine kinase 3 alpha	0	8659	19	774	6687.36	11750.7				0	10477	20	782	8177.37	14287.6							0	8500	18	845	7167.29	12262.1								GSK3a	X	PSTK	Protein kinase - Non-receptor protein-serine/threonine	Protein-serine/threonine kinase	CMGC	GSK
997	495	PK649	GSK3a	Y279	Glycogen synthase-serine kinase 3 alpha	0	442	14	609	260.652	458.004	429.166	28.8374	6.7194	0	428	19	561	229.449	400.897	404.894	3.99675	0.987113	7.70651	-5.65583		0	553	20	676	360.308	616.43	644.684	28.2537	4.38257	11.102	50.2176			GSK3a	X	PSTK	Protein kinase - Non-receptor protein-serine/threonine	Protein-serine/threonine kinase	CMGC	GSK
998	495	PK649	GSK3a	Y279	Glycogen synthase-serine kinase 3 alpha	0	415	16	571	227.829	400.329				0	410	18	597	234.024	408.89							0	604	23	677	393.337	672.937								GSK3a	X	PSTK	Protein kinase - Non-receptor protein-serine/threonine	Protein-serine/threonine kinase	CMGC	GSK
999	496	PK650	GSK3a	Y284+Y285	Glycogen synthase-serine kinase 3 alpha	0	4150	18	665	2747.78	4828.25	4834.79	6.53834	0.135235	0	4140	18	616	2539.15	4436.44	4605.11	168.66	3.66247	3.7977	-4.7507		0	5196	20	730	3778.48	6464.38	6819.21	354.829	5.20337	5.3386	41.0445			GSK3a	X	PSTK	Protein kinase - Non-receptor protein-serine/threonine	Protein-serine/threonine kinase	CMGC	GSK
1000	496	PK650	GSK3a	Y284+Y285	Glycogen synthase-serine kinase 3 alpha	0	4046	12	683	2755.22	4841.33				0	4162	16	659	2732.21	4773.77							0	5482	22	768	4193.28	7174.04								GSK3a	X	PSTK	Protein kinase - Non-receptor protein-serine/threonine	Protein-serine/threonine kinase	CMGC	GSK
1001	497	NK270-3	GSK3b	Pan-specific	Glycogen synthase-serine kinase 3 beta	0	7624	20	808	6144.03	10796	10791.3	4.66962	0.0432721	0	9016	16	753	6777	11840.9	11837.8	3.05763	0.0258293	0.0691014	9.69784		0	8250	20	849	6987.27	11954.1	12085.2	131.097	1.08477	1.12804	11.9903			GSK3B	X	PSTK	Protein kinase - Non-receptor protein-serine/threonine	Protein-serine/threonine kinase	CMGC	GSK
1002	497	NK270-3	GSK3b	Pan-specific	Glycogen synthase-serine kinase 3 beta	0	7697	14	799	6138.72	10786.6				0	8758	18	775	6773.5	11834.8							0	8350	18	857	7140.52	12216.3								GSK3B	X	PSTK	Protein kinase - Non-receptor protein-serine/threonine	Protein-serine/threonine kinase	CMGC	GSK
1003	498	NK070	GSK3b	Pan-specific	Glycogen synthase-serine kinase 3 beta	0	10991	14	730	8013.21	14080.4	14766.9	686.558	4.64929	0	11601	16	694	8039.99	14047.6	13688	359.638	2.62741	7.27669	-7.3068		0	10205	16	727	7407.4	12672.9	14012.1	1339.23	9.55766	14.2069	-5.11157			GSK3B	X	PSTK	Protein kinase - Non-receptor protein-serine/threonine	Protein-serine/threonine kinase	CMGC	GSK
1004	498	NK070	GSK3b	Pan-specific	Glycogen synthase-serine kinase 3 beta	0	11246	14	783	8794.66	15453.5				0	10990	14	695	7628.32	13328.3							0	11628	20	773	8972.98	15351.4								GSK3B	X	PSTK	Protein kinase - Non-receptor protein-serine/threonine	Protein-serine/threonine kinase	CMGC	GSK
1005	499	PK188	GSK3b	S9	Glycogen synthase-serine kinase 3 beta	0	500	16	652	315.568	554.499	629.514	75.0144	11.9162	0	688	14	674	454.276	793.718	931.448	137.73	14.7867	26.7029	47.9631	Possible	0	650	18	752	475.264	813.101	904.041	90.9398	10.0593	21.9755	43.6094			GSK3B	X	PSTK	Protein kinase - Non-receptor protein-serine/threonine	Protein-serine/threonine kinase	CMGC	GSK
1006	499	PK188	GSK3b	S9	Glycogen synthase-serine kinase 3 beta	0	570	20	729	400.95	704.528				0	831	14	749	611.933	1069.18							0	876	22	681	581.574	994.981								GSK3B	X	PSTK	Protein kinase - Non-receptor protein-serine/threonine	Protein-serine/threonine kinase	CMGC	GSK
1007	500	PK883	GSK3b	T275+T277	Glycogen synthase-serine kinase 3 beta	0	7954	16	713	5659.79	9945.09	8110.48	1834.61	22.6203	0	8876	16	746	6609.56	11548.3	11729.2	180.872	1.54206	24.1623	44.6178	Possible	0	10373	24	708	7327.09	12535.5	12613.7	78.2402	0.620278	23.2405	55.5239	Possible		GSK3B	X	PSTK	Protein kinase - Non-receptor protein-serine/threonine	Protein-serine/threonine kinase	CMGC	GSK
1008	500	PK883	GSK3b	T275+T277	Glycogen synthase-serine kinase 3 beta	0	4344	20	826	3571.62	6275.87				0	9758	20	700	6816.6	11910.1							0	9872	20	753	7418.56	12692								GSK3B	X	PSTK	Protein kinase - Non-receptor protein-serine/threonine	Protein-serine/threonine kinase	CMGC	GSK
1009	501	PK651	GTF2F1	S385+T389	General transcription factor IIF subunit 1	0	8044	18	812	6517.11	11451.5	12352	900.434	7.28981	0	8617	16	799	6872.2	12007.2	12677.3	670.065	5.28556	12.5754	2.63373		0	10038	16	799	8007.58	13699.7	14113.7	414.044	2.93362	10.2234	14.2632			GTF2F1	X	PSTK	Protein kinase - Non-receptor protein-serine/threonine; Transcription protein	Protein-serine/threonine kinase	Atypical			X
1010	501	PK651	GTF2F1	S385+T389	General transcription factor IIF subunit 1	0	8721	12	866	7541.99	13252.4				0	9136	20	838	7639.21	13347.3							0	10210	16	833	8491.6	14527.8								GTF2F1	X	PSTK	Protein kinase - Non-receptor protein-serine/threonine; Transcription protein	Protein-serine/threonine kinase	Atypical			X
1011	502	PN602	GTF2I	S412	General transcription factor II-I	0	5468	16	778	4241.66	7453.21	7476.04	22.8289	0.30536	0	6410	14	764	4886.54	8537.84	8118	419.84	5.17172	5.47708	8.58692		0	5634	14	769	4321.78	7393.88	8060.13	666.248	8.26597	8.57133	7.81278						Transcription, coactivator/corepressor					X
1012	502	PN602	GTF2I	S412	General transcription factor II-I	0	5676	16	754	4267.64	7498.87				0	6112	18	723	4405.96	7698.16							0	6040	18	847	5100.63	8726.38											Transcription, coactivator/corepressor					X
1013	503	PK652	GUK1	Y53	Guanylate kinase	0	7462	26	888	6603.17	11602.7	12040.6	437.907	3.63691	0	8030	31	892	7135.11	12466.6	11899.8	566.769	4.76284	8.39975	-1.16973		0	7900	22	891	7019.3	12008.9	12564.7	555.745	4.42308	8.05999	4.35198			GUK1	X	PSTK	Protein kinase - Non-receptor protein-serine/threonine	Protein-serine/threonine kinase	Atypical
1014	503	PK652	GUK1	Y53	Guanylate kinase	0	7593	22	938	7101.6	12478.6				0	7512	22	866	6486.34	11333							0	8378	24	918	7668.97	13120.4								GUK1	X	PSTK	Protein kinase - Non-receptor protein-serine/threonine	Protein-serine/threonine kinase	Atypical
1015	504	PN703	GYS1	S641+S645	Glycogen [starch] synthase, muscle	0	6494	18	800	5180.8	9103.43	9314.75	211.323	2.2687	0	7146	22	770	5485.48	9584.31	8811.19	773.125	8.77436	11.0431	-5.40606		0	6530	20	781	5084.31	8698.45	9305.24	606.791	6.52096	8.78966	-0.102106						Glycogen synthesis
1016	504	PN703	GYS1	S641+S645	Glycogen [starch] synthase, muscle	0	6709	16	810	5421.33	9526.07				0	6148	14	750	4600.5	8038.06							0	7320	14	793	5793.66	9912.03											Glycogen synthesis
1017	505	PN704	GYS2	Y45	Glycogen [starch] synthase, liver	0	546	16	533	282.49	496.376	535.986	39.6096	7.39004	0	612	16	542	323.032	564.406	539.4	25.0061	4.63592	12.026	0.636999		0	754	14	578	427.72	731.761	747.201	15.4403	2.06642	9.45647	39.4069						Glycogen synthesis
1018	505	PN704	GYS2	Y45	Glycogen [starch] synthase, liver	0	574	15	586	327.574	575.596				0	578	14	522	294.408	514.394							0	718	16	635	445.77	762.642											Glycogen synthesis
1019	520	PN036	H2AFX	S139	Histone H2A.X	0	32	9	578	13.294	23.3595	343.816	320.456	93.2058	0	724	8	243	173.988	303.994	304.267	0.272566	0.089581	93.2954	-11.5029		0	2472	6	280	690.48	1181.3	601.183	580.119	96.4963	189.702	74.8561
1020	520	PN036	H2AFX	S139	Histone H2A.X	0	1472	18	260	378.04	664.272				0	718	18	249	174.3	304.54							0	33	14	648	12.312	21.0639
1021	521	PN037	H2B	S14	Histone H2B	0	1943	10	299	577.967	1015.57	1072.04	56.4703	5.26754	0	1610	10	320	512	894.574	940.746	46.1719	4.90801	10.1755	-12.2474		0	1754	10	287	500.528	856.324	959.303	102.979	10.7348	16.0023	-10.5164
1022	521	PN037	H2B	S14	Histone H2B	0	2038	12	317	642.242	1128.51				0	1840	12	309	564.852	986.918							0	2068	12	302	620.912	1062.28
1023	522	PN101-2	H3F3A	T3	Histone H3	0	5456	10	302	1644.69	2889.97	3107.92	217.957	7.01293	0	6352	10	310	1966.02	3435.06	2978.41	456.652	15.3321	22.345	-4.16723		0	347	10	494	166.478	284.817	1699.29	1414.47	83.239	90.2519	-45.324
1024	522	PN101-2	H3F3A	T3	Histone H3	0	6452	14	294	1892.77	3325.88				0	5111	11	283	1443.3	2521.76							0	6138	10	297	1820.02	3113.76
1025	523	PN038	H3F3A	S10	Histone H3	0	4564	10	566	2577.56	4529.16	4593.93	64.7702	1.40991	0	5204	14	544	2823.36	4933.02	4808.12	124.898	2.59765	4.00755	4.66247		0	5318	14	569	3017.98	5163.28	5180.17	16.8894	0.32604	1.73595	12.7612
1026	523	PN038	H3F3A	S10	Histone H3	0	4597	10	578	2651.29	4658.7				0	4698	12	572	2680.39	4683.22							0	5332	12	571	3037.72	5197.06
1027	524	PN039	H3F3A	S28	Histone H3	0	2600	8	295	764.64	1343.58	1225.82	117.768	9.60734	0	2440	8	320	778.24	1359.75	1296.29	63.4589	4.89541	14.5027	5.74943		0	2616	10	312	813.072	1391.04	1298.87	92.1699	7.09617	16.7035	5.95937
1028	524	PN039	H3F3A	S28	Histone H3	0	2107	12	301	630.595	1108.05				0	2217	12	320	705.6	1232.84							0	2226	8	318	705.324	1206.7
1029	525	PN228	H3F3A	S28	Histone H3	0	104	8	406	38.976	68.4866	77.3426	8.85602	11.4504	0	132	12	389	46.68	81.56	80.7842	0.775764	0.960291	12.4107	4.44989		0	136	10	436	54.936	93.9868	95.0407	1.05388	1.10887	12.5593	22.8827
1030	525	PN228	H3F3A	S28	Histone H3	0	120	8	438	49.056	86.1986				0	116	8	424	45.792	80.0085							0	128	10	476	56.168	96.0945
1031	506	PN518	HCA59	Y147	Uncharacterized protein C9orf78	0	10379	22	919	9518.08	16724.7	17066.2	341.534	2.00123	0	12083	28	961	11584.9	20241.2	18920	1321.28	6.98353	8.98476	10.8621		0	10512	26	925	9699.55	16594.4	17089.7	495.264	2.89803	4.89926	0.137415
1032	506	PN518	HCA59	Y147	Uncharacterized protein C9orf78	0	10804	24	919	9906.82	17407.7				0	11253	24	897	10072.4	17598.7							0	10524	25	979	10278.5	17584.9
1033	507	PN604	HCFC1	S1507	Host cell factor 1	0	14513	22	885	12824.5	22534.6	22526.3	8.26825	0.0367049	0	16810	20	867	14556.9	25434.1	24236	1198.06	4.94329	4.97999	7.58982		0	15022	20	889	13336.8	22817.1	22927.8	110.661	0.482649	0.519354	1.78213						Transcription, coactivator/corepressor					X
1034	507	PN604	HCFC1	S1507	Host cell factor 1	0	14902	18	861	12815.1	22518.1				0	15826	16	834	13185.5	23038							0	14691	22	918	13466.1	23038.4											Transcription, coactivator/corepressor					X
1035	508	NK271-1	Hck	Pan-specific	Tyrosine-protein kinase Hck	0	2496	12	737	1830.71	3216.82	3253.28	36.459	1.12068	0	2458	12	765	1871.19	3269.37	3703.82	434.45	11.7298	12.8505	13.8488		0	3540	12	738	2603.66	4454.46	4169.4	285.06	6.83697	7.95766	28.1597			HCK	X	PYK	Protein kinase - Non-receptor-tyrosine kinase	Protein-tyrosine kinase	TK	Src
1036	508	NK271-1	Hck	Pan-specific	Tyrosine-protein kinase Hck	0	2432	10	773	1872.21	3289.74				0	3078	10	772	2368.5	4138.27							0	2976	12	766	2270.42	3884.34								HCK	X	PYK	Protein kinase - Non-receptor-tyrosine kinase	Protein-tyrosine kinase	TK	Src
1037	509	NN169	HDAC4	Pan-specific	Histone deacetylase 4	0	1246	12	193	238.162	418.486	435.4	16.9143	3.88477	0	1420	10	175	246.75	431.125	407.737	23.3882	5.7361	9.62088	-6.35342		0	1484	10	197	290.378	496.791	457.202	39.5889	8.65895	12.5437	5.00733
1038	509	NN169	HDAC4	Pan-specific	Histone deacetylase 4	0	1149	10	226	257.414	452.314				0	1121	10	198	219.978	384.349							0	1156	10	213	244.098	417.613
1039	510	PN179	HDAC4/5/9	S246/259/220	Histone deacetylase 4	0	2196	12	228	497.952	874.975	855.818	19.1573	2.23848	0	3198	11	226	720.262	1258.45	990.944	267.509	26.9954	29.2339	15.7891		0	2676	8	247	658.996	1127.44	1042.02	85.4206	8.19762	10.4361	21.7569
1040	510	PN179	HDAC4/5/9	S246/259/220	Histone deacetylase 4	0	1907	10	251	476.147	836.66				0	1702	12	245	414.05	723.434							0	2134	8	263	559.138	956.596
1041	511	PN188	HDAC5	S498	Histone deacetylase 5	0	1612	8	234	375.336	659.52	717.851	58.3302	8.12568	0	1962	8	238	465.052	812.546	731.611	80.9345	11.0625	19.1882	1.91692		0	1662	8	264	436.656	747.049	751.73	4.68086	0.622679	8.74836	4.71954
1042	511	PN188	HDAC5	S498	Histone deacetylase 5	0	1870	14	238	441.728	776.181				0	1592	14	236	372.408	650.677							0	1822	10	244	442.128	756.411
1043	512	PP500	HePTP (PTPN7)	S44	Tyrosine-protein phosphatase non-receptor type 7	0	4164	14	539	2236.85	3930.47	4796.14	865.669	18.0493	0	3882	14	539	2084.85	3642.68	4412	769.313	17.4368	35.4861	-8.00946		0	5326	14	620	3293.44	5634.55	6617.65	983.101	14.8557	32.905	37.9787					PYP	Protein phosphatase - Non-receptor protein-tyrosine phosphatase
1044	512	PP500	HePTP (PTPN7)	S44	Tyrosine-protein phosphatase non-receptor type 7	0	5946	12	543	3222.16	5661.81				0	5340	16	557	2965.47	5181.31							0	7542	12	590	4442.7	7600.76										PYP	Protein phosphatase - Non-receptor protein-tyrosine phosphatase
1045	513	PP501	HePTP (PTPN7)	T66	Tyrosine-protein phosphatase non-receptor type 7	0	9680	18	616	5951.79	10458.2	10199.7	258.455	2.53394	0	10268	16	644	6602.29	11535.6	11585.3	49.6899	0.428905	2.96285	13.5846		0	9962	20	648	6442.42	11022	9972.24	1049.71	10.5264	13.0603	-2.23026					PYP	Protein phosphatase - Non-receptor protein-tyrosine phosphatase
1046	513	PP501	HePTP (PTPN7)	T66	Tyrosine-protein phosphatase non-receptor type 7	0	9350	14	606	5657.62	9941.26				0	9657	20	691	6659.17	11635							0	8240	14	634	5215.28	8922.52										PYP	Protein phosphatase - Non-receptor protein-tyrosine phosphatase
1047	514	PP528	HePTP (PTPN7)	S143	Tyrosine-protein phosphatase non-receptor type 7	0	10504	16	587	6156.46	10817.8	10540	277.847	2.63613	0	12526	16	622	7781.22	13595.5	13111.3	484.155	3.69265	6.32878	24.3963		0	10370	14	623	6451.79	11038	10977.8	60.1771	0.548171	3.1843	4.15427					PYP	Protein phosphatase - Non-receptor protein-tyrosine phosphatase
1048	514	PP528	HePTP (PTPN7)	S143	Tyrosine-protein phosphatase non-receptor type 7	0	9846	14	594	5840.21	10262.1				0	11635	16	622	7227.02	12627.2							0	10830	14	590	6381.44	10917.6										PYP	Protein phosphatase - Non-receptor protein-tyrosine phosphatase
1049	515	NK300-1	HGK (ZC1)	Pan-specific	Mitogen-activated protein kinase kinase kinase kinase 4	0	8774	20	622	5444.99	9567.64	10066.1	498.457	4.95184	0	9003	16	649	5832.56	10190.7	10223.1	32.3313	0.316259	5.2681	1.55942		0	7204	16	651	4679.39	8005.69	9361.88	1356.19	14.4863	19.4382	-6.99591			ZC1	X	PSTK	Protein kinase - Non-receptor protein-serine/threonine	Protein-serine/threonine kinase	STE	STE20	MSN
1050	515	NK300-1	HGK (ZC1)	Pan-specific	Mitogen-activated protein kinase kinase kinase kinase 4	0	9282	18	649	6012.34	10564.6				0	9278	20	634	5869.57	10255.4							0	9568	18	656	6264.8	10718.1								ZC1	X	PSTK	Protein kinase - Non-receptor protein-serine/threonine	Protein-serine/threonine kinase	STE	STE20	MSN
1051	516	PK653	HGK (ZC1)	T187	Mitogen-activated protein kinase kinase kinase kinase 4	0	5952	22	636	3771.48	6627.04	6920.85	293.804	4.2452	0	6306	18	612	3848.26	6723.73	7390.38	666.653	9.02055	13.2657	6.78438		0	7162	20	645	4606.59	7881.14	7485.17	395.979	5.29018	9.53538	8.15389			ZC1	X	PSTK	Protein kinase - Non-receptor protein-serine/threonine	Protein-serine/threonine kinase	STE	STE20	MSN
1052	516	PK653	HGK (ZC1)	T187	Mitogen-activated protein kinase kinase kinase kinase 4	0	6008	14	685	4105.89	7214.65				0	6262	22	739	4611.36	8057.04							0	6523	18	637	4143.69	7089.19								ZC1	X	PSTK	Protein kinase - Non-receptor protein-serine/threonine	Protein-serine/threonine kinase	STE	STE20	MSN
1053	517	PN519	HGS (Hrs)	Y216	Hepatocyte growth factor-regulated tyrosine kinase substrate	0	10455	20	555	5791.43	10176.4	9942.09	234.294	2.35658	0	11714	18	547	6397.71	11178.2	10461.7	716.456	6.84836	9.20494	5.22659		0	10417	17	569	5917.6	10124.1	9800.15	323.929	3.30535	5.66193	-1.42772
1054	517	PN519	HGS (Hrs)	Y216	Hepatocyte growth factor-regulated tyrosine kinase substrate	0	10269	19	539	5524.75	9707.8				0	9978	18	560	5577.6	9745.27							0	10142	16	547	5538.92	9476.22
1055	518	PK654	HIPK1	Y352	Homeodomain-interacting protein-serine kinase 1	0	6396	16	682	4351.16	7645.63	7394.57	251.056	3.39514	0	7228	16	697	5026.76	8782.84	7945.56	837.278	10.5377	13.9328	7.45126		0	6501	16	720	4669.2	7988.26	7506.05	482.209	6.42427	9.81941	1.50759			HIPK1	X	PSTK	Protein kinase - Non-receptor protein-serine/threonine	Protein-serine/threonine kinase	CMGC	DYRK	HIPK
1056	518	PK654	HIPK1	Y352	Homeodomain-interacting protein-serine kinase 1	0	5752	18	709	4065.41	7143.52				0	5708	18	715	4068.35	7108.28							0	5724	14	719	4105.49	7023.84								HIPK1	X	PSTK	Protein kinase - Non-receptor protein-serine/threonine	Protein-serine/threonine kinase	CMGC	DYRK	HIPK
1057	519	NK272-1	HIPK2	Pan-specific	Homeodomain-interacting protein-serine kinase 2	0	1393	16	619	852.363	1497.73	1531.58	33.8488	2.21006	0	1660	18	642	1054.16	1841.85	1639.16	202.689	12.3654	14.5755	7.02455		0	1502	14	642	955.296	1634.36	1607.73	26.6284	1.65627	3.86633	4.97238			HIPK2	X	PSTK	Protein kinase - Non-receptor protein-serine/threonine	Protein-serine/threonine kinase	CMGC	DYRK	HIPK
1058	519	NK272-1	HIPK2	Pan-specific	Homeodomain-interacting protein-serine kinase 2	0	1452	22	623	890.89	1565.42				0	1327	22	630	822.15	1436.47							0	1513	20	619	924.167	1581.1								HIPK2	X	PSTK	Protein kinase - Non-receptor protein-serine/threonine	Protein-serine/threonine kinase	CMGC	DYRK	HIPK
1059	526	PN605	HMGA1	S36+T39	High mobility group protein HMG-I/HMG-Y	0	12698	16	605	7672.61	13481.9	13717.6	235.662	1.71795	0	14405	16	633	9108.24	15914	15450.6	463.49	2.99983	4.71778	12.6334		0	12579	20	606	7610.75	13020.8	12787.6	233.165	1.82337	3.54132	-6.77917						DNA binding protein					X
1060	526	PN605	HMGA1	S36+T39	High mobility group protein HMG-I/HMG-Y	0	13293	14	598	7940.84	13953.2				0	14196	18	605	8577.69	14987.1							0	11946	14	615	7338.18	12554.5											DNA binding protein					X
1061	527	PN606	HMGA1	T53	High mobility group protein HMG-I/HMG-Y	0	13054	20	576	7507.58	13191.9	13298.3	106.348	0.799711	0	15468	18	603	9316.35	16277.7	15882	395.698	2.49149	3.2912	19.4288		0	12634	16	601	7583.42	12974	13442.4	468.34	3.48406	4.28377	1.08352						DNA binding protein					X
1062	527	PN606	HMGA1	T53	High mobility group protein HMG-I/HMG-Y	0	13514	12	565	7628.63	13404.6				0	14813	16	599	8863.4	15486.3							0	14405	14	565	8130.91	13910.7											DNA binding protein					X
1063	528	PN607	HMGB1	S35+S39	High mobility group protein B1	0	10701	14	618	6604.57	11605.2	11952.3	347.072	2.90382	0	11410	16	612	6973.13	12183.6	11746	437.536	3.72497	6.62879	-1.72558		0	10728	16	610	6534.32	11179.2	11436.1	256.905	2.24644	5.15026	-4.31863						DNA repair; Nuclear receptor co-regulator					X
1064	528	PN607	HMGB1	S35+S39	High mobility group protein B1	0	10972	18	639	6999.61	12299.3				0	10714	16	605	6472.29	11308.5							0	11204	18	611	6834.65	11693											DNA repair; Nuclear receptor co-regulator					X
1065	529	PN705	HMGCR	S872	3-hydroxy-3-methylglutaryl-coenzyme A reductase	0	6745	18	718	4829.99	8486.99	8274.22	212.778	2.57158	0	7615	16	696	5288.9	9240.85	8988.88	251.97	2.80313	5.37471	8.63727		0	7142	20	738	5256.04	8992.24	8962.77	29.471	0.328815	2.9004	8.32171						Cholesterol synthesis
1066	529	PN705	HMGCR	S872	3-hydroxy-3-methylglutaryl-coenzyme A reductase	0	6340	12	725	4587.8	8061.44				0	5499	10	911	5000.48	8736.91							0	7364	20	711	5221.58	8933.3											Cholesterol synthesis
1067	530	PN754	HMGCS1	S495	HMG-CoA synthase 1	0	19692	18	617	12138.9	21329.8	20467.7	862.023	4.21162	0	20913	20	624	13037.2	22778.8	22392.9	385.953	1.72355	5.93517	9.40584		0	19210	18	596	11438.4	19569.3	20055.4	486.06	2.42359	6.63521	-2.01454						Ketogenesis
1068	530	PN754	HMGCS1	S495	HMG-CoA synthase 1	0	19028	20	587	11157.7	19605.7				0	20207	22	624	12595.4	22006.9							0	20100	22	598	12006.6	20541.5											Ketogenesis
1069	531	PN608	HNF4A	S167	Hepatocyte nuclear factor 4-alpha	0	10836	18	733	7929.59	13933.5	14029.3	95.8822	0.683441	0	12258	16	771	9438.58	16491.2	16139.1	352.118	2.18177	2.86521	15.0383		0	11488	16	765	8776.08	15014.5	13968.2	1046.29	7.4905	8.17395	-0.435878						Transcription protein					X
1070	531	PN608	HNF4A	S167	Hepatocyte nuclear factor 4-alpha	0	11212	16	718	8038.73	14125.2				0	12498	18	724	9035.52	15787							0	10638	15	711	7552.95	12921.9											Transcription protein					X
1071	532	PN229	hnRNP-K	S302	Heterogeneous nuclear ribonucleoprotein K	0	60	12	656	31.488	55.329	63.259	7.93	12.5358	0	120	10	425	46.75	81.6823	81.2717	0.410596	0.505213	13.041	28.4745		0	128	8	382	45.84	78.425	89.8089	11.3839	12.6757	25.2115	41.9701
1072	532	PN229	hnRNP-K	S302	Heterogeneous nuclear ribonucleoprotein K	0	102	8	431	40.514	71.189				0	114	10	445	46.28	80.8611							0	132	8	477	59.148	101.193
1073	533	NK072	HPK1 (MAP4K1)	Pan-specific	Mitogen-activated protein kinase kinase kinase kinase 1	0	696	10	484	332.024	583.415	572.96	10.455	1.82474	0	801	8	492	390.156	681.686	600.326	81.3608	13.5528	15.3775	4.7762		0	752	10	555	411.81	704.542	671.74	32.802	4.88314	6.70788	17.2402			HPK1	X	PSTK	Protein kinase - Non-receptor protein-serine/threonine	Protein-serine/threonine kinase	STE	STE20	KHS
1074	533	NK072	HPK1 (MAP4K1)	Pan-specific	Mitogen-activated protein kinase kinase kinase kinase 1	0	628	10	518	320.124	562.505				0	554	8	544	297.024	518.965							0	710	8	532	373.464	638.938								HPK1	X	PSTK	Protein kinase - Non-receptor protein-serine/threonine	Protein-serine/threonine kinase	STE	STE20	KHS
1075	534	NN281-3	HRAS	Pan-specific	GTPase HRas	0	5226	14	564	2939.57	5165.25	5115.35	49.9074	0.97564	0	5172	16	575	2964.7	5179.97	5141.33	38.6344	0.751447	1.72709	0.508057		0	5708	14	594	3382.24	5786.47	5670.73	115.738	2.04098	3.01662	10.8572						GTPase
1076	534	NN281-3	HRAS	Pan-specific	GTPase HRas	0	5043	12	573	2882.76	5065.44				0	5032	14	582	2920.48	5102.7							0	5538	16	588	3246.94	5554.99											GTPase
1077	535	PN755	HRAS	Y157	GTPase HRas	0	8688	15	574	4978.3	8747.61	8595.49	152.114	1.7697	0	9307	14	585	5436.4	9498.57	9020.8	477.772	5.29633	7.06603	4.94799		0	8408	14	539	4524.37	7740.47	8308.27	567.796	6.8341	8.6038	-3.34158						GTPase
1078	535	PN755	HRAS	Y157	GTPase HRas	0	8608	12	559	4805.16	8443.38				0	8670	16	565	4889.51	8543.03							0	9262	14	561	5188.13	8876.06											GTPase
1079	536	NK383-1	HRI (HCR; EIF2AK1)	Pan-specific	Eukaryotic translation initiation factor 2-alpha kinase 1	0	104	12	484	44.528	78.2422	67.6185	10.6237	15.7112	0	144	10	482	64.588	112.849	81.3538	31.4953	38.714	54.4252	20.3129		0	94	6	529	46.552	79.6431	70.6321	9.011	12.7577	28.4689	4.45671			HRI	X	PSTK	Protein kinase - Non-receptor protein-serine/threonine	Protein-serine/threonine kinase	Other	PEK
1080	536	NK383-1	HRI (HCR; EIF2AK1)	Pan-specific	Eukaryotic translation initiation factor 2-alpha kinase 1	0	80	12	477	32.436	56.9948				0	68	10	492	28.536	49.8585							0	62	8	667	36.018	61.6211								HRI	X	PSTK	Protein kinase - Non-receptor protein-serine/threonine	Protein-serine/threonine kinase	Other	PEK
1081	537	PK876	HRI (HCR; EIF2AK1)	S258	Eukaryotic translation initiation factor 2-alpha kinase 1	0	2797	14	472	1313.58	2308.15	2254.93	53.2205	2.36019	0	3390	10	503	1700.14	2970.51	2657.79	312.72	11.7662	14.1264	17.866		0	2936	10	504	1474.7	2522.98	2397.31	125.672	5.24218	7.60237	6.31451			HRI	X	PSTK	Protein kinase - Non-receptor protein-serine/threonine	Protein-serine/threonine kinase	Other	PEK
1082	537	PK876	HRI (HCR; EIF2AK1)	S258	Eukaryotic translation initiation factor 2-alpha kinase 1	0	2518	12	500	1253	2201.71				0	2718	12	496	1342.18	2345.07							0	2687	10	496	1327.79	2271.64								HRI	X	PSTK	Protein kinase - Non-receptor protein-serine/threonine	Protein-serine/threonine kinase	Other	PEK
1083	538	NN268-2	HSF1	Pan-specific	Heat shock factor protein 1	0	2016	12	283	567.132	996.534	707.712	288.822	40.8107	0	3842	10	276	1057.63	1847.91	1133.22	714.693	63.0676	103.878	60.1241		0	1610	10	265	424	725.397	542.203	183.193	33.7869	74.5976	-23.3865						Transcription protein					X	X
1084	538	NN268-2	HSF1	Pan-specific	Heat shock factor protein 1	0	958	12	252	238.392	418.89				0	974	12	249	239.538	418.524							0	816	12	261	209.844	359.01											Transcription protein					X	X
1085	539	PN609	HSF1	S303+S307	Heat shock factor protein 1	0	8018	16	621	4969.24	8731.69	8976.93	245.247	2.73197	0	9910	16	622	6154.07	10752.5	10410.7	341.745	3.28262	6.01458	15.9721		0	8113	12	651	5273.75	9022.55	9037.79	15.2393	0.168618	2.90058	0.677915						Transcription protein					X	X
1086	539	PN609	HSF1	S303+S307	Heat shock factor protein 1	0	8402	18	626	5248.38	9222.18				0	9298	18	621	5762.88	10069							0	8398	12	631	5291.57	9053.03											Transcription protein					X	X
1087	540	NN152-2	HSP27 (HSP28; HSPB1)	Pan-specific	Heat shock 27 kDa protein beta 1	0	4066	14	292	1183.18	2079.03	1940.3	138.73	7.14995	0	4644	10	295	1367.03	2388.5	1887.41	501.089	26.5491	33.699	-2.72594		0	3774	12	310	1166.22	1995.22	1857.31	137.908	7.42512	14.5751	-4.27707						Chaperone protein						X
1088	540	NN152-2	HSP27 (HSP28; HSPB1)	Pan-specific	Heat shock 27 kDa protein beta 1	0	3570	10	288	1025.28	1801.57				0	2718	10	293	793.444	1386.32							0	3524	10	286	1005	1719.4											Chaperone protein						X
1089	541	PN041	HSP27 (HSP28; HSPB1)	S78	Heat shock 27 kDa protein beta 1	0	2680	12	274	731.032	1284.53	1134.88	149.649	13.1863	0	3270	8	267	870.954	1521.74	1237.59	284.155	22.9604	36.1467	9.05009		0	2640	12	271	712.188	1218.44	1111.81	106.629	9.59057	22.7769	-2.03279						Chaperone protein						X
1090	541	PN041	HSP27 (HSP28; HSPB1)	S78	Heat shock 27 kDa protein beta 1	0	2237	12	252	560.7	985.232				0	2079	12	264	545.688	953.434							0	2043	10	289	587.537	1005.18											Chaperone protein						X
1091	542	PN230	HSP27 (HSP28; HSPB1)	S82	Heat shock 27 kDa protein beta 1	0	76	8	651	44.268	77.7854	92.2581	14.4727	15.6872	0	216	11	416	85.28	149.003	144.138	4.86425	3.37471	19.0619	56.2337		0	220	6	461	98.654	168.781	159.154	9.6269	6.04878	21.736	72.51						Chaperone protein						X
1092	542	PN230	HSP27 (HSP28; HSPB1)	S82	Heat shock 27 kDa protein beta 1	0	163	10	397	60.741	106.731				0	198	10	424	79.712	139.274							0	200	10	460	87.4	149.528											Chaperone protein						X
1093	543	NN061	HSP90a (HSP90AA1; HSP90; HSP86; HSPC; HSPCA; LAP2)	Pan-specific	Heat shock 90 kDa protein alpha	0	803	12	482	381.262	669.933	711.225	41.2912	5.80565	0	860	11	492	417.708	729.826	762.502	32.6764	4.28542	10.0911	7.20977		0	976	12	514	495.496	847.715	888.348	40.6333	4.57403	10.3797	24.9041						Chaperone protein						X
1094	543	NN061	HSP90a (HSP90AA1; HSP90; HSP86; HSPC; HSPCA; LAP2)	Pan-specific	Heat shock 90 kDa protein alpha	0	886	12	490	428.26	752.516				0	915	12	504	455.112	795.179							0	1084	13	507	542.997	928.982											Chaperone protein						X
1095	544	NN061-18	HSP90AB1 (HSP90; HSP84; HSP90B; HSPC2; HSPCB)	Pan-specific	Heat shock 90 kDa protein beta	0	2612	10	292	759.784	1335.05	1210.47	124.582	10.292	0	3032	14	284	857.112	1497.56	1268.85	228.713	18.0253	28.3173	4.82255		0	2463	12	289	708.339	1211.86	1130.95	80.9083	7.15402	17.446	-6.56959						Chaperone protein						X
1096	544	NN061-18	HSP90AB1 (HSP90; HSP84; HSP90B; HSPC2; HSPCB)	Pan-specific	Heat shock 90 kDa protein beta	0	2282	10	272	617.984	1085.89				0	2001	10	299	595.309	1040.13							0	2156	10	286	613.756	1050.04											Chaperone protein						X
1097	545	PN520	HSP90AB1 (HSP90B; HSP90-beta)	Y484	Heat shock 90 kDa protein beta	0	10434	14	624	6502.08	11425.1	11146.6	278.473	2.49827	0	10705	14	601	6425.29	11226.4	11025.4	200.99	1.82298	4.32124	-1.08787		0	10270	12	602	6175.32	10565	10519.8	45.2039	0.429703	2.92797	-5.62371						Chaperone protein						X
1098	545	PN520	HSP90AB1 (HSP90B; HSP90-beta)	Y484	Heat shock 90 kDa protein beta	0	10676	12	580	6185.12	10868.2				0	10286	12	603	6195.22	10824.4							0	10791	12	568	6122.47	10474.6											Chaperone protein						X
1099	546	NN422-1	Huntingtin	Pan-specific	Huntington's disease protein	0	80	8	322	23.184	40.7377	38.7837	1.95395	5.03806	0	112	6	392	41.552	72.6003	66.3295	6.27076	9.45394	14.492	71.024		0	146	10	308	41.888	71.6637	93.802	22.1383	23.6011	28.6391	141.859
1100	546	NN422-1	Huntingtin	Pan-specific	Huntington's disease protein	0	38	6	655	20.96	36.8298				0	110	8	337	34.374	60.0588							0	180	8	394	67.768	115.94
1101	547	PN103	Huntingtin	S419	Huntington's disease protein	0	345	12	229	76.257	133.995	129.482	4.51323	3.48562	0	353	12	313	106.733	186.486	165.745	20.7403	12.5134	15.999	28.0068		0	388	10	294	111.132	190.129	187.866	2.26344	1.20482	4.69044	45.0908
1102	547	PN103	Huntingtin	S419	Huntington's disease protein	0	264	10	280	71.12	124.968				0	312	8	273	82.992	145.005							0	304	10	369	108.486	185.602
1103	548	NK073-2	ICK	Pan-specific	Intestinal cell (MAK-like) kinase	0	428	10	431	180.158	316.564	331.393	14.8286	4.47462	0	520	12	465	236.22	412.727	368.22	44.5068	12.087	16.5616	11.113		0	556	12	521	283.424	484.894	456.694	28.1998	6.17477	10.6494	37.8105			ICK	X	PSTK	Protein kinase - Non-receptor protein-serine/threonine	Protein-serine/threonine kinase	CMGC	RCK
1104	548	NK073-2	ICK	Pan-specific	Intestinal cell (MAK-like) kinase	0	464	10	434	197.036	346.221				0	429	6	438	185.274	323.714							0	519	12	494	250.458	428.494								ICK	X	PSTK	Protein kinase - Non-receptor protein-serine/threonine	Protein-serine/threonine kinase	CMGC	RCK
1105	549	PK655	ICK	Y156+T157	Intestinal cell (MAK-like) kinase	0	9342	16	611	5698.19	10012.5	10085.3	72.7582	0.721427	0	10414	16	642	6675.52	11663.6	11104.9	558.691	5.03105	5.75247	10.1094		0	8920	12	672	5986.18	10241.4	9729.48	511.921	5.26155	5.98298	-3.52822			ICK	X	PSTK	Protein kinase - Non-receptor protein-serine/threonine	Protein-serine/threonine kinase	CMGC	RCK
1106	549	PK655	ICK	Y156+T157	Intestinal cell (MAK-like) kinase	0	9422	22	615	5781	10158.1				0	9460	14	639	6035.99	10546.2							0	8516	18	634	5387.73	9217.55								ICK	X	PSTK	Protein kinase - Non-receptor protein-serine/threonine	Protein-serine/threonine kinase	CMGC	RCK
1107	550	PK656	ICK	Y159	Intestinal cell (MAK-like) kinase	0	4342	20	576	2489.47	4374.37	4532.98	158.607	3.49896	0	5285	18	608	3202.34	5595.17	5209.62	385.547	7.40068	10.8996	14.9272		0	4848	12	603	2916.11	4989	4748.79	240.212	5.0584	8.55736	4.76091			ICK	X	PSTK	Protein kinase - Non-receptor protein-serine/threonine	Protein-serine/threonine kinase	CMGC	RCK
1108	550	PK656	ICK	Y159	Intestinal cell (MAK-like) kinase	0	4288	16	625	2670	4691.58				0	4678	22	593	2761.01	4824.07							0	4542	14	582	2635.3	4508.57								ICK	X	PSTK	Protein kinase - Non-receptor protein-serine/threonine	Protein-serine/threonine kinase	CMGC	RCK
1109	551	PN706	IDH1	T75+T77	Isocitrate dehydrogenase [NADP] cytoplasmic	0	18231	20	597	10872	19103.6	18405.2	698.43	3.79474	0	19916	20	632	12574.3	21970	21492.9	477.011	2.21938	6.01412	16.7764		0	18072	18	585	10561.6	18069.2	16826.9	1242.34	7.38305	11.1778	-8.57553						Carbohydrate Metabolism - citrate (TCA) cycle
1110	551	PN706	IDH1	T75+T77	Isocitrate dehydrogenase [NADP] cytoplasmic	0	17664	16	571	10077	17706.8				0	18988	16	634	12028.2	21015.9							0	15776	16	578	9109.28	15584.5											Carbohydrate Metabolism - citrate (TCA) cycle
1111	552	PN757	IDH1	Y391	Isocitrate dehydrogenase [NADP] cytoplasmic	0	6744	18	605	4069.23	7150.23	7299.79	149.556	2.04877	0	7854	18	608	4764.29	8324.24	7983.94	340.295	4.26224	6.31101	9.37219		0	7710	18	671	5161.33	8830.22	8164.08	666.14	8.1594	10.2082	11.8399						Carbohydrate Metabolism - citrate (TCA) cycle
1112	552	PN757	IDH1	Y391	Isocitrate dehydrogenase [NADP] cytoplasmic	0	6810	16	624	4239.46	7449.35				0	7176	16	611	4374.76	7643.65							0	7284	16	603	4382.6	7497.94											Carbohydrate Metabolism - citrate (TCA) cycle
1113	553	NK074-4	IGF1R	Pan-specific	Insulin-like growth factor 1 receptor protein-tyrosine kinase	0	239	12	524	118.948	209.009	171.259	37.7505	22.043	0	314	10	534	162.336	283.636	234.186	49.4497	21.1155	43.1585	36.7442		0	206	10	574	112.504	192.477	187.371	5.10515	2.72462	24.7676	9.40845			IGF1R	X	PYK	Protein kinase - Receptor-tyrosine kinase	Protein-tyrosine kinase	TK	InsR
1114	553	NK074-4	IGF1R	Pan-specific	Insulin-like growth factor 1 receptor protein-tyrosine kinase	0	153	8	524	75.98	133.508				0	208	10	534	105.732	184.737							0	196	12	579	106.536	182.266								IGF1R	X	PYK	Protein kinase - Receptor-tyrosine kinase	Protein-tyrosine kinase	TK	InsR
1115	554	NK074-2	IGF1R	Pan-specific	Insulin-like growth factor 1 receptor protein-tyrosine kinase	0	606	14	508	300.736	528.437	514.06	14.377	2.79675	0	698	12	517	354.662	619.671	616.645	3.02618	0.490749	3.2875	19.9557		0	774	12	541	412.242	705.281	679.394	25.8867	3.81027	6.60702	32.1623			IGF1R	X	PYK	Protein kinase - Receptor-tyrosine kinase	Protein-tyrosine kinase	TK	InsR
1116	554	NK074-2	IGF1R	Pan-specific	Insulin-like growth factor 1 receptor protein-tyrosine kinase	0	574	12	506	284.372	499.683				0	662	8	537	351.198	613.618							0	724	14	538	381.98	653.507								IGF1R	X	PYK	Protein kinase - Receptor-tyrosine kinase	Protein-tyrosine kinase	TK	InsR
1117	555	PK657	IGF1R	Y1161+T1163	Insulin-like growth factor 1 receptor protein-tyrosine kinase	0	3384	14	569	1917.53	3369.38	3382.25	12.8729	0.3806	0	3178	12	544	1722.3	3009.24	3205.63	196.394	6.12653	6.50713	-5.22211		0	4522	13	593	2673.84	4574.51	4359.98	214.53	4.92044	5.30104	28.9075			IGF1R	X	PYK	Protein kinase - Receptor-tyrosine kinase	Protein-tyrosine kinase	TK	InsR
1118	555	PK657	IGF1R	Y1161+T1163	Insulin-like growth factor 1 receptor protein-tyrosine kinase	0	3508	14	553	1932.18	3395.13				0	3516	14	556	1947.11	3402.02							0	4374	16	556	2423.05	4145.45								IGF1R	X	PYK	Protein kinase - Receptor-tyrosine kinase	Protein-tyrosine kinase	TK	InsR
1119	556	PK152	IGF1R	Y1280	Insulin-like growth factor 1 receptor protein-tyrosine kinase	0	3324	16	320	1058.56	1860.05	1509.37	350.677	23.2334	0	2520	16	294	736.176	1286.26	1135.2	151.06	13.3069	36.5403	-24.7899		0	2641	16	324	850.5	1455.07	1221.19	233.882	19.152	42.3854	-19.0927			IGF1R	X	PYK	Protein kinase - Receptor-tyrosine kinase	Protein-tyrosine kinase	TK	InsR
1120	556	PK152	IGF1R	Y1280	Insulin-like growth factor 1 receptor protein-tyrosine kinase	0	2386	14	278	659.416	1158.69				0	1963	14	289	563.261	984.138							0	2052	20	284	577.088	987.306								IGF1R	X	PYK	Protein kinase - Receptor-tyrosine kinase	Protein-tyrosine kinase	TK	InsR
1121	557	PK658	IGF1R	Y1346	Insulin-like growth factor 1 receptor	0	2554	12	593	1507.41	2648.73	2625.54	23.1926	0.883345	0	2937	16	618	1805.18	3154.03	2839.54	314.493	11.0755	11.9588	8.15069		0	2432	12	647	1565.74	2678.73	2508.78	169.955	6.77441	7.65776	-4.44721			IGF1R	X	PYK	Protein kinase - Receptor-tyrosine kinase	Protein-tyrosine kinase	TK	InsR
1122	557	PK658	IGF1R	Y1346	Insulin-like growth factor 1 receptor	0	2428	12	613	1481.01	2602.35				0	2326	10	624	1445.18	2525.05							0	2367	10	580	1367.06	2338.82								IGF1R	X	PYK	Protein kinase - Receptor-tyrosine kinase	Protein-tyrosine kinase	TK	InsR
1123	558	NN064	IkBa	Pan-specific	Inhibitor of NF-kappa-B alpha (MAD3)	0	2310	14	571	1311.02	2303.65	2212.42	91.2311	4.12359	0	2238	14	558	1240.99	2168.28	1809.25	359.03	19.8441	23.9677	-18.2229		0	1720	13	578	986.646	1687.99	1781.62	93.6224	5.25491	9.3785	-19.4719
1124	558	NN064	IkBa	Pan-specific	Inhibitor of NF-kappa-B alpha (MAD3)	0	2158	10	562	1207.18	2121.19				0	1426	12	587	830.018	1450.22							0	1846	10	597	1096.09	1875.24
1125	559	PN232	IkBa	S32	Inhibitor of NF-kappa-B alpha (MAD3)	0	34	4	655	19.65	34.5279	62.4051	27.8771	44.6713	0	146	8	428	59.064	103.198	88.2903	14.9072	16.8844	61.5556	41.4793		0	52	8	660	29.04	49.6828	83.3265	33.6437	40.3757	85.047	33.5253
1126	559	PN232	IkBa	S32	Inhibitor of NF-kappa-B alpha (MAD3)	0	148	8	367	51.38	90.2822				0	126	6	350	42	73.383							0	167	8	430	68.37	116.97
1127	560	PN164	IkBa	Y42	Inhibitor of NF-kappa-B alpha (MAD3)	0	543	8	179	95.765	168.273	156.445	11.8282	7.56064	0	692	10	178	121.396	212.105	173.748	38.3566	22.076	29.6366	11.0604		0	561	9	190	104.88	179.433	164.58	14.8535	9.02514	16.5858	5.19965
1128	560	PN164	IkBa	Y42	Inhibitor of NF-kappa-B alpha (MAD3)	0	483	10	174	82.302	144.617				0	420	10	189	77.49	135.392							0	452	10	198	87.516	149.726
1129	561	PN168	IkBe	S161	NF-kappa-B inhibitor epsilon	0	510	8	220	110.44	194.059	182.012	12.047	6.61878	0	690	12	212	143.736	251.138	203.746	47.3915	23.26	29.8788	11.9409		0	450	12	270	118.26	202.324	178.735	23.5891	13.1978	19.8166	-1.80058
1130	561	PN168	IkBe	S161	NF-kappa-B inhibitor epsilon	0	439	11	226	96.728	169.965				0	386	10	238	89.488	156.355							0	406	10	229	90.684	155.146
1131	562	PK154	IKKa (IkBKA)	T23	Inhibitor of NF-kappa-B protein-serine kinase alpha (CHUK)	0	2269	14	286	644.93	1133.24	1184.22	50.9836	4.30525	0	2604	14	276	714.84	1248.98	1047.38	201.598	19.2478	23.5531	-11.5552		0	2719	10	303	820.827	1404.3	1302.75	101.553	7.79527	12.1005	10.0092			IKKa	X	PSTK	Protein kinase - Non-receptor protein-serine/threonine	Protein-serine/threonine kinase	Other	IKK
1132	562	PK154	IKKa (IkBKA)	T23	Inhibitor of NF-kappa-B protein-serine kinase alpha (CHUK)	0	2436	12	290	702.96	1235.2				0	1685	10	289	484.075	845.783							0	2314	12	305	702.11	1201.2								IKKa	X	PSTK	Protein kinase - Non-receptor protein-serine/threonine	Protein-serine/threonine kinase	Other	IKK
1133	563	PK659	IKKa (IkBKA)	T179+S180	Inhibitor of NF-kappa-B protein-serine kinase alpha (CHUK)	0	13032	18	650	8459.1	14863.9	16159.7	1295.82	8.01883	0	16563	15	685	11335.4	19805.3	19173.7	631.679	3.29452	11.3133	18.6511		0	11665	18	679	7908.31	13529.9	13699.5	169.595	1.23797	9.25679	-15.2245			IKKa	X	PSTK	Protein kinase - Non-receptor protein-serine/threonine	Protein-serine/threonine kinase	Other	IKK
1134	563	PK659	IKKa (IkBKA)	T179+S180	Inhibitor of NF-kappa-B protein-serine kinase alpha (CHUK)	0	14588	22	682	9934.01	17455.5				0	16220	18	655	10612.3	18542							0	11636	22	698	8106.57	13869.1								IKKa	X	PSTK	Protein kinase - Non-receptor protein-serine/threonine	Protein-serine/threonine kinase	Other	IKK
1135	564	NK076-7	IKKb (IkBKB)	Pan-specific	Inhibitor of nuclear factor kappa B kinase beta subunit	0	634	14	504	312.48	549.073	593.743	44.6702	7.52348	0	822	14	547	441.976	772.227	676.19	96.0374	14.2027	21.7262	13.8858		0	754	14	539	398.86	682.386	685.252	2.86566	0.418191	7.94167	15.4121			IKKb	X	PSTK	Protein kinase - Non-receptor protein-serine/threonine	Protein-serine/threonine kinase	Other	IKK
1136	564	NK076-7	IKKb (IkBKB)	Pan-specific	Inhibitor of nuclear factor kappa B kinase beta subunit	0	675	12	548	363.324	638.414				0	658	12	514	332.044	580.152							0	750	12	545	402.21	688.118								IKKb	X	PSTK	Protein kinase - Non-receptor protein-serine/threonine	Protein-serine/threonine kinase	Other	IKK
1137	580	NK076-5	IKKb (IkBKB)	Pan-specific	Inhibitor of nuclear factor kappa B kinase beta subunit	0	8283	14	622	5143.32	9037.57	9273.62	236.057	2.54547	0	9144	18	620	5658.12	9885.95	9345.4	540.553	5.78417	8.32963	0.773995		0	8585	18	591	5063.1	8662.16	8778.96	116.802	1.33047	3.87594	-5.3341			IKKb	X	PSTK	Protein kinase - Non-receptor protein-serine/threonine	Protein-serine/threonine kinase	Other	IKK
1138	580	NK076-5	IKKb (IkBKB)	Pan-specific	Inhibitor of nuclear factor kappa B kinase beta subunit	0	8266	16	656	5412	9509.68				0	8142	14	620	5039.36	8804.85							0	8540	16	610	5199.64	8895.76								IKKb	X	PSTK	Protein kinase - Non-receptor protein-serine/threonine	Protein-serine/threonine kinase	Other	IKK
1139	565	PK660	IKKe (IkBKE)	S172	Inhibitor of nuclear factor kappa-B kinase subunit epsilon	0	7173	16	603	4315.67	7583.27	7893.94	310.671	3.93557	0	7495	16	621	4644.46	8114.87	7986.38	128.486	1.60881	5.54438	1.17107		0	7942	14	617	4891.58	8368.71	8299.53	69.1796	0.833536	4.76911	5.13801			IKKe	X	PSTK	Protein kinase - Non-receptor protein-serine/threonine	Protein-serine/threonine kinase	Other	IKK
1140	565	PK660	IKKe (IkBKE)	S172	Inhibitor of nuclear factor kappa-B kinase subunit epsilon	0	7590	10	616	4669.28	8204.61				0	7462	16	604	4497.38	7857.9							0	7578	14	636	4810.7	8230.35								IKKe	X	PSTK	Protein kinase - Non-receptor protein-serine/threonine	Protein-serine/threonine kinase	Other	IKK
1141	566	NN077-2	IKKg (NEMO)	Pan-specific	I-kappa-B kinase gamma/NF-kappa-B essential modulator	0	353	12	439	149.699	263.043	274.817	11.7738	4.28422	0	397	10	459	177.633	310.363	328.659	18.296	5.56685	9.85107	19.592		0	444	10	517	224.378	383.875	393.497	9.62177	2.4452	6.72942	43.1851						Regulatory subunit IKK
1142	566	NN077-2	IKKg (NEMO)	Pan-specific	I-kappa-B kinase gamma/NF-kappa-B essential modulator	0	360	10	466	163.1	286.591				0	404	10	504	198.576	346.955							0	466	12	519	235.626	403.119											Regulatory subunit IKK
1143	567	PK189	IKKg (NEMO)	S376	I-kappa-B kinase gamma/NF-kappa-B essential modulator	0	210	10	465	93	163.415	159.418	3.99663	2.50701	0	215	10	472	96.76	169.061	158.273	10.7873	6.81562	9.32264	-0.718112		0	222	12	456	95.76	163.83	180.867	17.0366	9.4194	11.9264	13.4544						Regulatory subunit IKK
1144	567	PK189	IKKg (NEMO)	S376	I-kappa-B kinase gamma/NF-kappa-B essential modulator	0	197	10	473	88.451	155.421				0	200	12	449	84.412	147.486							0	254	12	478	115.676	197.903											Regulatory subunit IKK
1145	568	PN758	IKKg (NEMO)	S377	I-kappa-B kinase gamma/NF-kappa-B essential modulator	0	13679	16	662	9044.91	15893.2	15319.9	573.313	3.74227	0	14941	16	662	9880.35	17263.1	17579.2	316.08	1.79804	5.54031	14.7472		0	13864	17	657	9097.48	15564.3	15722.2	157.879	1.00418	4.74645	2.62604						Regulatory subunit IKK
1146	568	PN758	IKKg (NEMO)	S377	I-kappa-B kinase gamma/NF-kappa-B essential modulator	0	12870	18	653	8392.36	14746.6				0	15078	16	680	10242.2	17895.3							0	13955	18	666	9282.04	15880.1											Regulatory subunit IKK
1147	569	PN707	IKZF1	Y413	DNA-binding protein IKZF1 (Ikaros)	0	854	12	512	431.104	757.513	753.577	3.93601	0.52231	0	870	12	524	449.592	785.534	769.816	15.7179	2.04178	2.56409	2.15492		0	946	10	517	483.912	827.897	821.686	6.21035	0.755806	1.27812	9.03813						Transcription protein					X
1148	569	PN707	IKZF1	Y413	DNA-binding protein IKZF1 (Ikaros)	0	816	8	528	426.624	749.641				0	840	10	520	431.6	754.098							0	954	12	506	476.652	815.476											Transcription protein					X
1149	482	PN227	IL6ST (GP130)	S782	Interleukin-6 receptor subunit beta	0	202	14	421	79.148	139.075	148.511	9.43588	6.35368	0	216	12	419	85.476	149.345	127.574	21.7712	17.0656	23.4192	-14.0978		0	286	16	488	131.76	225.42	225.443	0.0222409	0.00986545	6.36354	51.8025
1150	482	PN227	IL6ST (GP130)	S782	Interleukin-6 receptor subunit beta	0	228	16	424	89.888	157.946				0	181	16	367	60.555	105.803							0	276	14	503	131.786	225.465
1151	570	NK078-4	ILK1 (ILK)	Pan-specific	Integrin-linked protein-serine kinase-1	0	277	10	499	133.233	234.11	235.151	1.04111	0.442741	0	276	12	502	132.528	231.555	228.473	3.08209	1.349	1.79174	-2.83997		0	348	10	537	181.506	310.528	300.975	9.55334	3.17413	3.61687	27.992			ILK	X	PSTK	Protein kinase - Non-receptor protein-serine/threonine	Protein-serine/threonine kinase	TKL	MLK	ILK
1152	570	NK078-4	ILK1 (ILK)	Pan-specific	Integrin-linked protein-serine kinase-1	0	266	8	521	134.418	236.192				0	268	10	500	129	225.391							0	332	10	529	170.338	291.421								ILK	X	PSTK	Protein kinase - Non-receptor protein-serine/threonine	Protein-serine/threonine kinase	TKL	MLK	ILK
1153	571	PK661	ILK1 (ILK)	S343	Integrin-linked protein-serine kinase-1	0	1882	14	544	1016.19	1785.6	1994.35	208.754	10.4673	0	1564	16	570	882.36	1541.67	1867.06	325.386	17.4277	27.895	-6.38275		0	2637	14	568	1489.86	2548.92	2695.39	146.469	5.43404	15.9013	35.1511			ILK	X	PSTK	Protein kinase - Non-receptor protein-serine/threonine	Protein-serine/threonine kinase	TKL	MLK	ILK
1154	571	PK661	ILK1 (ILK)	S343	Integrin-linked protein-serine kinase-1	0	2174	16	581	1253.8	2203.11				0	2233	16	566	1254.82	2192.44							0	2918	14	572	1661.09	2841.86								ILK	X	PSTK	Protein kinase - Non-receptor protein-serine/threonine	Protein-serine/threonine kinase	TKL	MLK	ILK
1155	572	PK662	ILK1 (ILK)	Y351	Integrin-linked protein-serine kinase-1	0	178	8	256	43.52	76.471	58.2846	18.1865	31.2029	0	168	12	281	43.836	76.5909	67.4495	9.14143	13.553	44.7559	15.7245		0	208	10	285	56.43	96.5428	94.0946	2.44821	2.60187	33.8048	61.4399			ILK	X	PSTK	Protein kinase - Non-receptor protein-serine/threonine	Protein-serine/threonine kinase	TKL	MLK	ILK
1156	572	PK662	ILK1 (ILK)	Y351	Integrin-linked protein-serine kinase-1	0	40	5	652	22.82	40.0981				0	116	8	309	33.372	58.3081							0	152	8	372	53.568	91.6464								ILK	X	PSTK	Protein kinase - Non-receptor protein-serine/threonine	Protein-serine/threonine kinase	TKL	MLK	ILK
1157	573	NK079-2	InsR (IR)	Pan-specific	Insulin receptor	0	928	12	529	484.564	851.45	828.801	22.6496	2.73282	0	1209	12	537	642.789	1123.09	931.488	191.603	20.5696	23.3024	12.3898		0	1152	14	561	638.418	1092.23	1057.99	34.2442	3.23673	5.96955	27.6529			INSR	X	PYK	Protein kinase - Receptor protein-tyrosine	Protein-tyrosine kinase	TK	InsR
1158	573	NK079-2	InsR (IR)	Pan-specific	Insulin receptor	0	876	12	531	458.784	806.151				0	789	12	545	423.465	739.884							0	1096	10	551	598.386	1023.74								INSR	X	PYK	Protein kinase - Receptor protein-tyrosine	Protein-tyrosine kinase	TK	InsR
1159	574	NK079-3	InsR (IR)	Pan-specific	Insulin receptor	0	66	8	681	39.498	69.4038	76.8734	7.46963	9.71679	0	144	10	451	60.434	105.591	92.8051	12.7861	13.7774	23.4942	20.7245		0	116	8	464	50.112	85.7337	84.6456	1.0881	1.28547	11.0023	10.1103			INSR	X	PYK	Protein kinase - Receptor protein-tyrosine	Protein-tyrosine kinase	TK	InsR
1160	574	NK079-3	InsR (IR)	Pan-specific	Insulin receptor	0	106	10	500	48	84.3431				0	112	10	449	45.798	80.019							0	121	10	440	48.84	83.5575								INSR	X	PYK	Protein kinase - Receptor protein-tyrosine	Protein-tyrosine kinase	TK	InsR
1161	575	PK663	InsR (IR)	Y1189	Insulin receptor	0	3736	12	668	2487.63	4371.13	4464.15	93.0128	2.08355	0	4249	16	683	2891.14	5051.44	4813.37	238.073	4.94608	7.02963	7.8228		0	4192	16	693	2893.97	4951.12	4716.45	234.668	4.97553	7.05908	5.65179			INSR	X	PYK	Protein kinase - Receptor protein-tyrosine	Protein-tyrosine kinase	TK	InsR
1162	575	PK663	InsR (IR)	Y1189	Insulin receptor	0	3514	14	741	2593.5	4557.16				0	3848	14	683	2618.62	4575.3							0	3749	12	701	2619.64	4481.78								INSR	X	PYK	Protein kinase - Receptor protein-tyrosine	Protein-tyrosine kinase	TK	InsR
1163	578	NK080-2	IRAK1	Pan-specific	Interleukin 1 receptor-associated kinase 1 (Pelle-like protein kinase)	0	384	14	542	200.54	352.378	334.596	17.7823	5.31457	0	444	12	564	243.648	425.705	377.818	47.8877	12.6748	17.9894	12.9176		0	384	14	599	221.63	379.174	367.029	12.1453	3.30908	8.62365	9.69307			IRAK1	X	PSTK	Protein kinase - Non-receptor protein-serine/threonine	Protein-serine/threonine kinase	TKL	IRAK
1164	578	NK080-2	IRAK1	Pan-specific	Interleukin 1 receptor-associated kinase 1 (Pelle-like protein kinase)	0	312	12	601	180.3	316.814				0	348	12	562	188.832	329.93							0	358	14	603	207.432	354.883								IRAK1	X	PSTK	Protein kinase - Non-receptor protein-serine/threonine	Protein-serine/threonine kinase	TKL	IRAK
1165	579	PK664	IRAK1	T387	Interleukin 1 receptor-associated kinase 1 (Pelle-like protein kinase)	0	9478	16	646	6112.45	10740.5	11829.8	1089.32	9.2083	0	10722	16	660	7065.96	12345.8	11754.1	591.65	5.03356	14.2419	-0.639888		0	10460	14	719	7510.67	12849.6	12449.6	399.947	3.21252	12.4208	5.23952			IRAK1	X	PSTK	Protein kinase - Non-receptor protein-serine/threonine	Protein-serine/threonine kinase	TKL	IRAK
1166	579	PK664	IRAK1	T387	Interleukin 1 receptor-associated kinase 1 (Pelle-like protein kinase)	0	10382	12	709	7352.33	12919.1				0	9421	12	679	6388.71	11162.5							0	10146	12	695	7043.13	12049.7								IRAK1	X	PSTK	Protein kinase - Non-receptor protein-serine/threonine	Protein-serine/threonine kinase	TKL	IRAK
1167	581	PK665	IRAK4	T345+S346	Interleukin 1 receptor-associated kinase 4	0	12427	20	728	9032.3	15871.1	15701.8	169.298	1.07821	0	13048	20	730	9510.44	16616.8	16743.7	126.883	0.757796	1.836	6.63552		0	12316	14	766	9423.33	16121.8	16197.9	76.0606	0.469571	1.54778	3.1596			IRAK4	X	PSTK	Protein kinase - Non-receptor protein-serine/threonine	Protein-serine/threonine kinase	TKL	IRAK
1168	581	PK665	IRAK4	T345+S346	Interleukin 1 receptor-associated kinase 4	0	11494	14	770	8839.6	15532.5				0	12862	22	752	9655.68	16870.6							0	12182	18	782	9512.25	16273.9								IRAK4	X	PSTK	Protein kinase - Non-receptor protein-serine/threonine	Protein-serine/threonine kinase	TKL	IRAK
1169	582	PN610	IRF3	T135	Interferon regulatory factor 3	0	12360	18	662	8170.4	14356.6	14248.9	107.709	0.755909	0	13302	16	662	8795.33	15367.3	14751.9	615.471	4.17215	4.92806	3.52993		0	12216	16	682	8320.4	14234.9	13841.5	393.384	2.84206	3.59797	-2.8591						Transcription protein					X
1170	582	PN610	IRF3	T135	Interferon regulatory factor 3	0	11631	18	693	8047.81	14141.2				0	12128	16	668	8090.82	14136.4							0	11874	18	663	7860.53	13448.1											Transcription protein					X
1171	583	NK273-1	IRR (INSRR)	Pan-specific	Insulin receptor-related protein	0	2144	12	525	1119.3	1966.77	2063.04	96.2697	4.66639	0	2217	12	560	1234.8	2157.46	2106.85	50.6133	2.40232	7.06871	2.12326		0	2408	10	581	1393.24	2383.61	2308.39	75.224	3.25873	7.92512	11.8922			IRR	X	PYK	Protein kinase - Receptor protein-tyrosine	Protein-tyrosine kinase	TK	InsR
1172	583	NK273-1	IRR (INSRR)	Pan-specific	Insulin receptor-related protein	0	2183	8	565	1228.88	2159.31				0	2144	12	552	1176.86	2056.23							0	2300	10	570	1305.3	2233.16								IRR	X	PYK	Protein kinase - Receptor protein-tyrosine	Protein-tyrosine kinase	TK	InsR
1173	584	NN383-2	IRS1	Pan-specific	Insulin receptor substrate 1	0	130	10	406	48.72	85.6082	93.9054	8.29725	8.83575	0	132	10	398	48.556	84.8378	97.7549	12.9172	13.2138	22.0496	4.09933		0	136	10	444	55.944	95.7113	109.651	13.9399	12.713	21.5487	16.7677
1174	584	NN383-2	IRS1	Pan-specific	Insulin receptor substrate 1	0	141	10	444	58.164	102.203				0	148	10	459	63.342	110.672							0	178	10	430	72.24	123.591
1175	585	PN117	IRS1	S312	Insulin receptor substrate 1	0	1230	8	189	230.958	405.827	416.412	10.5851	2.54197	0	1218	8	191	231.11	403.799	227.057	176.742	77.8405	80.3825	-45.4731		0	1212	8	200	240.8	411.971	445.602	33.6317	7.54747	10.0894	7.00992
1176	585	PN117	IRS1	S312	Insulin receptor substrate 1	0	1211	8	202	243.006	426.997				0	93	6	331	28.797	50.3146							0	1516	10	186	280.116	479.234
1177	586	PN118	IRS1	S639	Insulin receptor substrate 1	0	1480	8	222	326.784	574.207	674.955	100.748	14.9266	0	1774	14	215	378.4	661.146	548.396	112.75	20.56	35.4866	-18.7508		0	1516	12	246	369.984	632.984	620.207	12.7774	2.06019	16.9868	-8.11146
1178	586	PN118	IRS1	S639	Insulin receptor substrate 1	0	1633	10	272	441.456	775.703				0	1201	8	209	249.337	435.645							0	1547	10	231	355.047	607.429
1179	576	NN424-1	ITGA4 (CD49D; Integrin a4 )	Pan-specific	Integrin alpha 4 (VLA4)	0	514	12	470	235.94	414.581	445.307	30.7255	6.89984	0	620	10	503	306.83	536.098	476.85	59.2481	12.4249	19.3247	7.08349		0	626	12	494	303.316	518.926	524.159	5.23346	0.99845	7.89829	17.7074
1180	576	NN424-1	ITGA4 (CD49D; Integrin a4 )	Pan-specific	Integrin alpha 4 (VLA4)	0	558	14	498	270.912	476.032				0	524	10	465	239.01	417.602							0	656	10	479	309.434	529.392
1181	577	PN231	ITGB3	Y785	Integrin beta-3	0	14	2	722	8.664	15.2239	16.4188	1.19486	7.2774	0	16	2	718	10.052	17.563	15.0103	2.55268	17.0062	24.2836	-8.57832		0	14	2	727	8.724	14.9254	15.8578	0.932409	5.87981	13.1572	-3.41677
1182	577	PN231	ITGB3	Y785	Integrin beta-3	0	16	2	716	10.024	17.6136				0	12	2	713	7.13	12.4576							0	16	2	701	9.814	16.7902
1183	587	NK274-1	ITK	Pan-specific	Tyrosine-protein kinase ITK/TSK	0	2090	14	845	1754.22	3082.42	3849.74	767.316	19.9316	0	5252	18	584	3056.66	5340.64	4822.8	517.836	10.7373	30.6689	25.276		0	4427	14	584	2577.19	4409.17	4606.78	197.616	4.28967	24.2213	19.6648			ITK	X	PYK	Protein kinase - Non-receptor-tyrosine kinase	Protein-tyrosine kinase	TK	Tec
1184	587	NK274-1	ITK	Pan-specific	Tyrosine-protein kinase ITK/TSK	0	4462	16	591	2627.59	4617.05				0	4314	14	573	2463.9	4304.96							0	4710	14	598	2808.21	4804.4								ITK	X	PYK	Protein kinase - Non-receptor-tyrosine kinase	Protein-tyrosine kinase	TK	Tec
1185	588	PK666	ITK	Y512	Tyrosine-protein kinase ITK/TSK	0	9552	18	665	6340.11	11140.5	10651.2	489.343	4.59426	0	10602	18	688	7281.79	12722.9	12177.5	545.373	4.47854	9.0728	14.3301		0	9894	18	668	6597.17	11286.7	11398.6	111.875	0.981485	5.57575	7.01728			ITK	X	PYK	Protein kinase - Non-receptor-tyrosine kinase	Protein-tyrosine kinase	TK	Tec
1186	588	PK666	ITK	Y512	Tyrosine-protein kinase ITK/TSK	0	9022	14	642	5783.14	10161.8				0	9735	16	685	6657.52	11632.1							0	9793	14	688	6727.95	11510.5								ITK	X	PYK	Protein kinase - Non-receptor-tyrosine kinase	Protein-tyrosine kinase	TK	Tec
1187	589	PN521	ITSN2	Y968	Intersectin-2	0	5059	16	626	3156.92	5547.17	5521.63	25.5401	0.462547	0	5970	20	684	4069.8	7110.82	6513.48	597.34	9.17083	9.63337	17.963		0	5411	14	679	3664.56	6269.49	6198.71	70.7749	1.14177	1.60432	12.2624
1188	589	PN521	ITSN2	Y968	Intersectin-2	0	4934	16	636	3127.85	5496.09				0	5282	16	643	3386.04	5916.14							0	5374	20	669	3581.83	6127.94
1189	590	PN611	IWS1	S720+T721+T725	Protein IWS1 homologue	0	15848	18	695	11001.9	19331.9	19095.2	236.679	1.23947	0	17432	28	724	12600.5	22015.8	20972.9	1042.9	4.97259	6.21206	9.83334		0	14757	16	760	11203.2	19166.8	17218.3	1948.53	11.3166	12.5561	-9.82911						Transcription protein					X
1190	590	PN611	IWS1	S720+T721+T725	Protein IWS1 homologue	0	14718	16	730	10732.5	18858.5				0	16362	20	698	11406.7	19930							0	12680	20	705	8925.3	15269.8											Transcription protein					X
1191	591	NK084-2	JAK1	Pan-specific	Janus protein-tyrosine kinase 1	0	178	10	481	80.808	141.992	117.328	24.6633	21.0208	0	230	10	391	86.02	150.295	120.928	29.3672	24.2848	45.3056	3.06835		0	180	8	422	72.584	124.18	109.201	14.9784	13.7163	34.7371	-6.92665			JAK1	X	PYK	Protein kinase - Non-receptor-tyrosine kinase	Protein-tyrosine kinase	TK	JakA
1192	591	NK084-2	JAK1	Pan-specific	Janus protein-tyrosine kinase 1	0	140	12	412	52.736	92.6649				0	142	10	397	52.404	91.5611							0	144	10	411	55.074	94.2229								JAK1	X	PYK	Protein kinase - Non-receptor-tyrosine kinase	Protein-tyrosine kinase	TK	JakA
1193	592	NK084-5	JAK1	Pan-specific	Janus protein-tyrosine kinase 1	0	10115	16	752	7594.45	13344.6	14217.4	872.821	6.13911	0	11588	14	778	9004.57	15732.9	15749	16.0499	0.101911	6.24102	10.7727		0	10932	18	779	8502.01	14545.6	13899.1	646.457	4.65106	10.7902	-2.23849			JAK1	X	PYK	Protein kinase - Non-receptor-tyrosine kinase	Protein-tyrosine kinase	TK	JakA
1194	592	NK084-5	JAK1	Pan-specific	Janus protein-tyrosine kinase 1	0	10954	14	785	8587.9	15090.2				0	11132	20	812	9022.94	15765							0	10372	16	748	7746.29	13252.7								JAK1	X	PYK	Protein kinase - Non-receptor-tyrosine kinase	Protein-tyrosine kinase	TK	JakA
1195	593	PK126	JAK1	Y1022	Janus protein-tyrosine kinase 1	0	2172	12	233	503.28	884.337	771.416	112.921	14.6382	0	1722	12	223	381.33	666.266	644.266	21.9992	3.41461	18.0528	-16.4826		0	2194	14	221	481.78	824.249	801.341	22.9082	2.85873	17.4969	3.87928			JAK1	X	PYK	Protein kinase - Non-receptor-tyrosine kinase	Protein-tyrosine kinase	TK	JakA
1196	593	PK126	JAK1	Y1022	Janus protein-tyrosine kinase 1	0	1578	10	239	374.752	658.494				0	1532	10	234	356.148	622.267							0	1832	12	250	455	778.433								JAK1	X	PYK	Protein kinase - Non-receptor-tyrosine kinase	Protein-tyrosine kinase	TK	JakA
1197	594	PK884	JAK1	Y1034+Y1035	Janus protein-tyrosine kinase 1	0	8518	12	716	6090.3	10701.5	10017.5	684.001	6.82803	0	9908	14	771	7628.27	13328.2	12032.1	1296.15	10.7724	17.6004	20.1102		0	8564	18	673	5751.46	9839.83	9783.63	56.2029	0.574458	7.40249	-2.33504			JAK1	X	PYK	Protein kinase - Non-receptor-tyrosine kinase	Protein-tyrosine kinase	TK	JakA
1198	594	PK884	JAK1	Y1034+Y1035	Janus protein-tyrosine kinase 1	0	7940	12	670	5311.76	9333.54				0	8470	18	727	6144.6	10735.9							0	7959	18	716	5685.76	9727.43								JAK1	X	PYK	Protein kinase - Non-receptor-tyrosine kinase	Protein-tyrosine kinase	TK	JakA
1199	595	PK895	JAK1	T1107	Janus protein-tyrosine kinase 1	0	9082	18	602	5456.53	9587.92	9643.61	55.6857	0.577437	0	10755	16	664	7130.7	12458.9	11693.2	765.705	6.54832	7.12575	21.2529		0	8668	16	617	5338.28	9132.96	9435.7	302.747	3.20853	3.78596	-2.15586			JAK1	X	PYK	Protein kinase - Non-receptor-tyrosine kinase	Protein-tyrosine kinase	TK	JakA
1200	595	PK895	JAK1	T1107	Janus protein-tyrosine kinase 1	0	8570	12	645	5519.91	9699.29				0	10069	14	622	6254.21	10927.5							0	8964	14	636	5692.2	9738.45								JAK1	X	PYK	Protein kinase - Non-receptor-tyrosine kinase	Protein-tyrosine kinase	TK	JakA
1201	596	NK085-3	JAK2	Pan-specific	Janus protein-tyrosine kinase 2	0	7114	14	645	4579.5	8046.85	7857.99	188.868	2.40351	0	7958	16	681	5408.5	9449.82	8204.39	1245.43	15.18	17.5835	4.40828		0	6653	18	682	4525.07	7741.68	7267.52	474.16	6.52437	8.92788	-7.51425			JAK2	X	PYK	Protein kinase - Non-receptor-tyrosine kinase	Protein-tyrosine kinase	TK	JakA
1202	596	NK085-3	JAK2	Pan-specific	Janus protein-tyrosine kinase 2	0	6595	12	663	4364.53	7669.12				0	6245	12	639	3982.89	6958.96							0	6197	12	642	3970.77	6793.36								JAK2	X	PYK	Protein kinase - Non-receptor-tyrosine kinase	Protein-tyrosine kinase	TK	JakA
[truncated: 1,508 more rows]
[truncated: 15 more columns]

## Sheet: Formulas
												Globally Normalized Values for the signal intensity of samples analyzed with the KAM-1325 antibody microarray data were colourized using the Conditional Formatting feature under Format in the pull down menu of MS-Excel. This feature lets users colourize cells in the spreadsheet according to their desired criteria. In the case of your data, the Globally Normalized intensity signals with a value of…
[truncated: 2,718 more rows]
[truncated: 15 more columns]

[truncated: 3 more sheets: Protein+Antibody Info, Gene Ontology Terms, Kinexus Ab Testing Links]
